# Supplementary material for: Mov10 suppresses retroelements and regulates neuronal development and function in the developing brain
Source: BMC Biol. 2017 Jun 29;15:54. doi: 10.1186/s12915-017-0387-1 (PMC5492891; doi:10.1186/s12915-017-0387-1)
Supplement: Supplementary file 7 — Brain iCLIP mRNA identities. (XLSX 71 kb) [file 12915_2017_387_MOESM7_ESM.xlsx]

## Sheet: Sheet1
Refseq gene name	Transcript ID	Ensembl Gene ID	Entrez Gene ID
1110028C15Rik	NM_001122738	ENSMUSG00000026004	68691
1200014J11Rik	NM_025818	ENSMUSG00000020783	66874
1700088E04Rik	NM_138581	ENSMUSG00000033029	27660
2410089E03Rik	NM_001162906	ENSMUSG00000039801	73692
2510009E07Rik	NM_001001881	ENSMUSG00000043391	72190
2900026A02Rik	NM_172884	ENSMUSG00000051339	243219
4933403F05Rik	NM_153794	ENSMUSG00000038121	108654
8430427H17Rik	NM_001001986	ENSMUSG00000061411	329540
9430020K01Rik	NM_001081963	ENSMUSG00000033960	240185
9530068E07Rik	NM_153117	ENSMUSG00000036275	213673
9530082P21Rik	NR_015472	ENSMUSG00000097006	638247
A130022J15Rik	NM_175313	ENSMUSG00000035245	101351
Abat	NM_001170978	ENSMUSG00000057880	268860
Abhd2	NM_018811	ENSMUSG00000039202	54608
Acadm	NM_007382	ENSMUSG00000062908	11364
Acin1	NM_001085472	ENSMUSG00000022185	56215
Acly	NM_001199296	ENSMUSG00000020917	104112
Acp2	NM_007387	ENSMUSG00000002103	11432
Actb	NM_007393	ENSMUSG00000029580	11461
Acvrl1	NM_009612	ENSMUSG00000000530	11482
Adam12	NM_007400	ENSMUSG00000054555	11489
Adamts2	NM_175643	ENSMUSG00000036545	216725
Add1	NM_001024458	ENSMUSG00000029106	11518
Afap1	NM_027373	ENSMUSG00000029094	70292
Agpat5	NM_026792	ENSMUSG00000031467	52123
Agrn	NM_021604	ENSMUSG00000041936	11603
Akirin2	NM_001007589	ENSMUSG00000028291	433693
Aldh2	NM_009656	ENSMUSG00000029455	11669
Alg12	NM_001142357	ENSMUSG00000035845	223774
Alx4	NM_007442	ENSMUSG00000040310	11695
Amot	NM_153319	ENSMUSG00000041688	27494
Angptl2	NM_011923	ENSMUSG00000004105	26360
Ankrd13c	NM_001013806	ENSMUSG00000039988	433667
Ankrd28	NM_001024604	ENSMUSG00000014496	105522
Ankrd46	NM_175134	ENSMUSG00000048307	68839
Ano6	NM_001253813	ENSMUSG00000064210	105722
Aplnr	NM_011784	ENSMUSG00000044338	23796
Aqp1	NM_007472	ENSMUSG00000004655	11826
Arf6	NM_007481	ENSMUSG00000044147	11845
Arhgef12	NM_027144	ENSMUSG00000059495	69632
Arhgef15	NM_177566	ENSMUSG00000052921	442801
Arl5b	NM_029466	ENSMUSG00000017418	75869
Arl6ip5	NM_022992	ENSMUSG00000035199	65106
Arpc2	NM_029711	ENSMUSG00000006304	76709
Arpc4	NM_001170485	ENSMUSG00000079426	68089
Atf5	NM_030693	ENSMUSG00000038539	107503
Atg16l1	NM_001205391	ENSMUSG00000026289	77040
Atp13a2	NM_001164366	ENSMUSG00000036622	74772
Atp1a2	NM_178405	ENSMUSG00000007097	98660
Atp1b2	NM_013415	ENSMUSG00000041329	11932
Atp2b4	NM_001167949	ENSMUSG00000026463	381290
Atp9a	NM_015731	ENSMUSG00000027546	11981
Atrn	NM_009730	ENSMUSG00000027312	11990
Atxn1	NM_001199304	ENSMUSG00000046876	20238
Atxn10	NM_016843	ENSMUSG00000016541	54138
Atxn2l	NM_183020	ENSMUSG00000032637	233871
AW551984	NM_001199556	ENSMUSG00000038112	244810
Azin1	NM_001102458	ENSMUSG00000037458	54375
Baz1b	NM_011714	ENSMUSG00000002748	22385
BC002230	NM_183155	ENSMUSG00000021179	217827
Bcl2l1	NM_009743	ENSMUSG00000007659	12048
Bcl2l13	NM_153516	ENSMUSG00000009112	94044
Bcl2l2	NM_007537	ENSMUSG00000089682	12050
Bcor	NM_001168321	ENSMUSG00000040363	71458
Bcr	NM_001081412	ENSMUSG00000009681	110279
Birc6	NM_007566	ENSMUSG00000024073	12211
C130074G19Rik	NM_178692	ENSMUSG00000039349	226777
C1qtnf2	NM_026979	ENSMUSG00000046491	69183
C230091D08Rik	NR_015479		330544
C330019G07Rik	NM_194340	ENSMUSG00000054280	215476
Cab39	NM_133781	ENSMUSG00000036707	12283
Cacna2d4	NM_001033382	ENSMUSG00000041460	319734
Cald1	NM_145575	ENSMUSG00000029761	109624
Calm3	NM_007590	ENSMUSG00000019370	12313
Calr	NM_007591	ENSMUSG00000003814	12317
Calu	NM_007594	ENSMUSG00000029767	12321
Capza2	NM_007604	ENSMUSG00000015733	12343
Cbx5	NM_001076789	ENSMUSG00000009575	12419
Cbx6	NM_028763	ENSMUSG00000089715	494448
Ccdc114	NM_001033243	ENSMUSG00000040189	211535
Ccdc91	NM_025911	ENSMUSG00000030301	67015
Ccnd1	NM_007631	ENSMUSG00000070348	12443
Ccnd3	NM_001081635	ENSMUSG00000034165	12445
Cd82	NM_001136055	ENSMUSG00000027215	12521
Cd93	NM_010740	ENSMUSG00000027435	17064
Cdc42	NM_001243769	ENSMUSG00000006699	12540
Cdc42bpb	NM_183016	ENSMUSG00000021279	217866
Celf1	NM_001244891	ENSMUSG00000005506	13046
Celf4	NM_001146292	ENSMUSG00000024268	108013
Cenpb	NM_007682	ENSMUSG00000068267	12616
Chmp7	NM_134078	ENSMUSG00000034190	105513
Chst15	NM_029935	ENSMUSG00000030930	77590
Chsy1	NM_001081163	ENSMUSG00000032640	269941
Cln6	NM_001033175	ENSMUSG00000032245	76524
Cnot6	NM_212484	ENSMUSG00000020362	104625
Col1a1	NM_007742	ENSMUSG00000001506	12842
Col4a1	NM_009931	ENSMUSG00000031502	12826
Col5a1	NM_015734	ENSMUSG00000026837	12831
Coro1c	NM_011779	ENSMUSG00000004530	23790
Coro2b	NM_175484	ENSMUSG00000041729	235431
Cplx2	NM_009946	ENSMUSG00000025867	12890
Cpsf6	NM_001013391	ENSMUSG00000055531	432508
Crtc1	NM_001004062	ENSMUSG00000003575	382056
Cs	NM_026444	ENSMUSG00000005683	12974
Csnk1g2	NM_001159591	ENSMUSG00000003345	103236
Csnk1g3	NM_152809	ENSMUSG00000073563	70425
Ctdsp2	NM_001113470	ENSMUSG00000078429	52468
Ctnnbip1	NM_001141930	ENSMUSG00000028988	67087
Ctnnd1	NM_001085448	ENSMUSG00000034101	12388
Cx3cr1	NM_009987	ENSMUSG00000052336	13051
Cxcl12	NM_001012477	ENSMUSG00000061353	20315
Cyfip1	NM_001164661	ENSMUSG00000030447	20430
D17Wsu92e	NM_001033279	ENSMUSG00000056692	224647
Daam1	NM_026102	ENSMUSG00000034574	208846
Dazap2	NM_011873	ENSMUSG00000000346	23994
Dcaf10	NM_153167	ENSMUSG00000035572	242418
Dcaf7	NM_027946	ENSMUSG00000049354	71833
Dck	NM_007832	ENSMUSG00000029366	13178
Ddb1	NM_015735	ENSMUSG00000024740	13194
Ddr2	NM_022563	ENSMUSG00000026674	18214
Ddx19b	NM_001190786	ENSMUSG00000033658	234733
Dpy19l1	NM_172920	ENSMUSG00000043067	244745
Dst	NM_133833	ENSMUSG00000026131	13518
Dym	NM_027727	ENSMUSG00000035765	69190
Dync1i2	NM_001198872	ENSMUSG00000027012	13427
Ehd1	NM_010119	ENSMUSG00000024772	13660
Ehd2	NM_153068	ENSMUSG00000074364	259300
Eif4ebp2	NM_010124	ENSMUSG00000020091	13688
Elk4	NM_007923	ENSMUSG00000026436	13714
Elovl1	NM_001039175	ENSMUSG00000006390	54325
Epb4.1	NM_001128606	ENSMUSG00000028906	269587
Erlin2	NM_153592	ENSMUSG00000031483	244373
Exoc6b	NM_177077	ENSMUSG00000033769	75914
Extl3	NM_018788	ENSMUSG00000021978	54616
F2r	NM_010169	ENSMUSG00000048376	14062
Faf2	NM_178397	ENSMUSG00000025873	76577
Fam125b	NM_175184	ENSMUSG00000038740	72543
Fam126a	NM_053090	ENSMUSG00000028995	84652
Fam168b	NM_001160235	ENSMUSG00000037503	214469
Fam171a1	NM_001081161	ENSMUSG00000050530	269233
Fam176b	NM_172145	ENSMUSG00000050212	230752
Fam63a	NM_133858	ENSMUSG00000038712	75007
Fasn	NM_007988	ENSMUSG00000025153	14104
Fbn2	NM_010181	ENSMUSG00000024598	14119
Fbxo11	NM_001081034	ENSMUSG00000005371	225055
Fbxo44	NM_001161851	ENSMUSG00000029001	230903
Ficd	NM_001010825	ENSMUSG00000053334	231630
Fkbp5	NM_010220	ENSMUSG00000024222	14229
Flt1	NM_010228	ENSMUSG00000029648	14254
Fmnl3	NM_011711	ENSMUSG00000023008	22379
Fndc3b	NM_173182	ENSMUSG00000039286	72007
Foxf2	NM_010225	ENSMUSG00000038402	14238
Foxk1	NM_199068	ENSMUSG00000056493	17425
Foxred1	NM_172291	ENSMUSG00000039048	235169
Fry	NM_172887	ENSMUSG00000056602	320365
Fstl1	NM_008047	ENSMUSG00000022816	14314
Fth1	NM_010239	ENSMUSG00000024661	14319
Fzd6	NM_001162494	ENSMUSG00000022297	14368
G6pdx	NM_008062	ENSMUSG00000031400	14381
Gabpb2	NM_029885	ENSMUSG00000038766	213054
Galnt2	NM_139272	ENSMUSG00000089704	108148
Glg1	NM_009149	ENSMUSG00000003316	20340
Glis2	NM_031184	ENSMUSG00000014303	83396
Glod4	NM_026029	ENSMUSG00000017286	67201
Glul	NM_008131	ENSMUSG00000026473	14645
Gmfb	NM_022023	ENSMUSG00000062014	63985
Gnas	NM_001077507	ENSMUSG00000027523	14683
Gne	NM_001190414	ENSMUSG00000028479	50798
Gnl1	NM_008136	ENSMUSG00000024429	14670
Gpr30	NM_029771	ENSMUSG00000053647	76854
Grb10	NM_001177629	ENSMUSG00000020176	14783
Grm8	NM_008174	ENSMUSG00000024211	14823
Grsf1	NM_001098476	ENSMUSG00000044221	231413
Gse1	NM_001145896	ENSMUSG00000031822	382034
Gsk3b	NM_019827	ENSMUSG00000022812	56637
Gtf2ird2	NM_053266	ENSMUSG00000015942	114674
H19	NR_001592		14955
H2-T24	NM_008207	ENSMUSG00000053835	15042
Heatr7b1	NM_001177364	ENSMUSG00000079429	100040766
Helq	NM_001081107	ENSMUSG00000035266	191578
Higd2a	NM_025933	ENSMUSG00000025868	67044
Hipk3	NM_001145824	ENSMUSG00000027177	15259
Hnrnpm	NM_001109913	ENSMUSG00000059208	76936
Hsp90ab1	NM_008302	ENSMUSG00000023944	15516
Hspg2	NM_008305	ENSMUSG00000028763	15530
Igf1r	NM_010513	ENSMUSG00000005533	16001
Igf2	NM_001122736	ENSMUSG00000048583	16002
Igfbp5	NM_010518	ENSMUSG00000026185	16011
Il6st	NM_010560	ENSMUSG00000021756	16195
Ilk	NM_001161724	ENSMUSG00000030890	16202
Impdh1	NM_011829	ENSMUSG00000003500	23917
Islr	NM_001195431	ENSMUSG00000037206	26968
Itm2c	NM_022417	ENSMUSG00000026223	64294
Jag2	NM_010588	ENSMUSG00000002799	16450
Jmy	NM_021310	ENSMUSG00000021690	57748
Kcnk10	NM_029911	ENSMUSG00000033854	72258
Kctd12	NM_177715	ENSMUSG00000098557	239217
Kdr	NM_010612	ENSMUSG00000062960	16542
Kif1a	NM_001110315	ENSMUSG00000014602	16560
Kif1c	NM_153103	ENSMUSG00000020821	16562
Kif5b	NM_008448	ENSMUSG00000006740	16573
Klf13	NM_021366	ENSMUSG00000052040	50794
Kpna6	NM_008468	ENSMUSG00000003731	16650
Kpnb1	NM_008379	ENSMUSG00000001440	16211
Kras	NM_021284	ENSMUSG00000030265	16653
L3mbtl2	NM_145993	ENSMUSG00000022394	214669
Lamc1	NM_010683	ENSMUSG00000026478	226519
Lamc2	NM_008485	ENSMUSG00000026479	16782
Laptm4b	NM_033521	ENSMUSG00000022257	114128
Large	NM_010687	ENSMUSG00000004383	16795
Lbh	NM_029999	ENSMUSG00000024063	77889
Lcp1	NM_001247984	ENSMUSG00000021998	18826
Lhfpl2	NM_172589	ENSMUSG00000045312	218454
Lifr	NM_001113386	ENSMUSG00000054263	16880
Lims1	NM_001193303	ENSMUSG00000019920	110829
Lix1l	NM_001163170	ENSMUSG00000049288	280411
Lmln	NM_172823	ENSMUSG00000022802	239833
Lmnb2	NM_010722	ENSMUSG00000062075	16907
Lox	NM_010728	ENSMUSG00000024529	16948
Lphn1	NM_181039	ENSMUSG00000013033	330814
Lpp	NM_001145952	ENSMUSG00000033306	210126
Lrp1	NM_008512	ENSMUSG00000040249	16971
Lrrc3	NM_145152	ENSMUSG00000051652	237387
Lrrc58	NM_177093	ENSMUSG00000034158	320184
Map2k6	NM_011943	ENSMUSG00000020623	26399
Map4k2	NM_009006	ENSMUSG00000024948	26412
Mapk3	NM_011952	ENSMUSG00000063065	26417
Mapk4	NM_172632	ENSMUSG00000024558	225724
Mapt	NM_001038609	ENSMUSG00000018411	17762
42435	NM_172606	ENSMUSG00000039100	223455
Mark4	NM_172279	ENSMUSG00000030397	232944
Mecp2	NM_001081979	ENSMUSG00000031393	17257
Med25	NM_029365	ENSMUSG00000002968	75613
Megf8	NM_001160400	ENSMUSG00000045039	269878
Met	NM_008591	ENSMUSG00000009376	17295
Metap2	NM_019648	ENSMUSG00000036112	56307
Mfap1a	NM_026220	ENSMUSG00000068479	67532
Mfhas1	NM_001081279	ENSMUSG00000070056	52065
Mlec	NM_175403	ENSMUSG00000048578	109154
Mll2	NM_001033276	ENSMUSG00000048154	381022
Mll5	NM_026984	ENSMUSG00000029004	69188
Mllt6	NM_139311	ENSMUSG00000038437	246198
Mmp17	NM_011846	ENSMUSG00000029436	23948
Mmp25	NM_001033339	ENSMUSG00000023903	240047
Mn1	NM_001081235	ENSMUSG00000070576	433938
Mprip	NM_012027	ENSMUSG00000005417	26936
Mrc2	NM_008626	ENSMUSG00000020695	17534
Mtap1b	NM_008634	ENSMUSG00000052727	17755
Mterfd2	NM_178051	ENSMUSG00000026273	69821
Mtmr12	NM_172958	ENSMUSG00000039458	268783
Mtss1l	NM_198625	ENSMUSG00000033763	244654
Myh9	NM_022410	ENSMUSG00000022443	17886
Myo10	NM_019472	ENSMUSG00000022272	17909
Myst4	NM_001205241	ENSMUSG00000021767	54169
Myt1l	NM_001093775	ENSMUSG00000061911	17933
Nacc2	NM_001037098	ENSMUSG00000026932	67991
Ncor1	NM_001252313	ENSMUSG00000018501	20185
Ncs1	NM_019681	ENSMUSG00000062661	14299
Nedd4	NM_010890	ENSMUSG00000032216	17999
Nfib	NM_001113209	ENSMUSG00000008575	18028
Nfic	NM_008688	ENSMUSG00000055053	18029
Nfix	NM_001081981	ENSMUSG00000001911	18032
Nnat	NM_010923	ENSMUSG00000067786	18111
Npepps	NM_008942	ENSMUSG00000001441	19155
Nrg2	NM_001167891	ENSMUSG00000060275	100042150
Nsd1	NM_008739	ENSMUSG00000021488	18193
Nsg2	NM_008741	ENSMUSG00000020297	18197
Nudt4	NM_027722	ENSMUSG00000020029	71207
Ociad1	NM_001159887	ENSMUSG00000029152	68095
Ogdh	NM_001252282	ENSMUSG00000020456	18293
Ogdhl	NM_001081130	ENSMUSG00000021913	239017
Orc3	NM_001159563	ENSMUSG00000040044	50793
Osgin2	NM_145950	ENSMUSG00000041153	209212
Otud4	NM_001081164	ENSMUSG00000036990	73945
Pacs2	NM_001081170	ENSMUSG00000021143	217893
Papola	NM_011112	ENSMUSG00000021111	18789
Parva	NM_020606	ENSMUSG00000030770	57342
Pbx1	NM_008783	ENSMUSG00000052534	18514
Pcdhga10	NM_033585		93710
Pcnx	NM_018814	ENSMUSG00000021140	54604
Pcnxl3	NM_144868	ENSMUSG00000054874	104401
Pea15a	NM_011063	ENSMUSG00000013698	18611
Phactr2	NM_001033257	ENSMUSG00000062866	215789
Phc3	NM_001165954	ENSMUSG00000037652	241915
Pigt	NM_133779	ENSMUSG00000017721	78928
Pik3ca	NM_008839	ENSMUSG00000027665	18706
Plagl1	NM_009538	ENSMUSG00000019817	22634
Plce1	NM_019588	ENSMUSG00000024998	74055
Plec	NM_001163540	ENSMUSG00000022565	18810
Pltp	NM_011125	ENSMUSG00000017754	18830
Plxna1	NM_008881	ENSMUSG00000030084	18844
Ppard	NM_011145	ENSMUSG00000002250	19015
Ppp1r9b	NM_172261	ENSMUSG00000038976	217124
Prex1	NM_177782	ENSMUSG00000039621	277360
Prkca	NM_011101	ENSMUSG00000050965	18750
Prnp	NM_011170	ENSMUSG00000079037	19122
Prrc2a	NM_001199044	ENSMUSG00000024393	53761
Prrc2b	NM_001159634	ENSMUSG00000039262	227723
Pspc1	NM_025682	ENSMUSG00000021938	66645
Ptbp2	NM_019550	ENSMUSG00000028134	56195
Ptgds	NM_008963	ENSMUSG00000015090	19215
Ptgfrn	NM_011197	ENSMUSG00000027864	19221
Ptpra	NM_001163688	ENSMUSG00000027303	19262
Ptprb	NM_029928	ENSMUSG00000020154	19263
Ptprt	NM_021464	ENSMUSG00000053141	19281
Ptpru	NM_001083119	ENSMUSG00000028909	19273
Ptrf	NM_008986	ENSMUSG00000004044	19285
Purb	NM_011221	ENSMUSG00000094483	19291
Pvrl1	NM_021424	ENSMUSG00000032012	58235
Pygb	NM_153781	ENSMUSG00000033059	110078
Rab5b	NM_177411	ENSMUSG00000000711	19344
Ralgapb	NM_177658	ENSMUSG00000027652	228850
Ralgds	NM_001145834	ENSMUSG00000026821	19730
Rapgef1	NM_001039086	ENSMUSG00000039844	107746
Rbm33	NM_028234	ENSMUSG00000048271	381626
Rbm4	NM_009032	ENSMUSG00000094936	19653
Rbpj	NM_001080927	ENSMUSG00000039191	19664
Rcc2	NM_173867	ENSMUSG00000040945	108911
Rdx	NM_001104616	ENSMUSG00000032050	19684
Rere	NM_001085492	ENSMUSG00000039852	68703
Rfx3	NM_001166414	ENSMUSG00000040929	19726
Rgma	NM_177740	ENSMUSG00000070509	244058
Rgs7bp	NM_029879	ENSMUSG00000021719	52882
Rhoc	NM_007484	ENSMUSG00000002233	11853
Rn45s	NR_046233		100861531
Rnf150	NM_177378	ENSMUSG00000047747	330812
Rnf207	NM_001033489	ENSMUSG00000058498	433809
Rpl14	NM_025974	ENSMUSG00000025794	67115
Rprd2	NM_001081293	ENSMUSG00000028106	75137
Rps24	NM_011297	ENSMUSG00000025290	20088
Rxra	NM_011305	ENSMUSG00000015846	20181
Samd8	NM_026283	ENSMUSG00000021770	67630
Satb1	NM_001163630	ENSMUSG00000023927	20230
Scd2	NM_009128	ENSMUSG00000025203	20250
Sdc3	NM_011520	ENSMUSG00000025743	20970
Sec11a	NM_019951	ENSMUSG00000025724	56529
Sec22c	NM_001164562	ENSMUSG00000061536	215474
Sec61a1	NM_016906	ENSMUSG00000030082	53421
Sel1l	NM_001039089	ENSMUSG00000020964	20338
Sema4g	NM_011976	ENSMUSG00000025207	26456
Sephs1	NM_175400	ENSMUSG00000026662	109079
Sepp1	NM_001042613	ENSMUSG00000064373	20363
42624	NM_001009818	ENSMUSG00000058013	52398
42621	NM_001252332	ENSMUSG00000018398	20362
Sepw1	NM_009156	ENSMUSG00000041571	20364
Setd3	NM_028262	ENSMUSG00000056770	52690
Sfrp1	NM_013834	ENSMUSG00000031548	20377
Sft2d2	NM_145512	ENSMUSG00000040848	108735
Sfxn1	NM_027324	ENSMUSG00000021474	14057
Sfxn5	NM_178639	ENSMUSG00000033720	94282
Sh3glb1	NM_019464	ENSMUSG00000037062	54673
Sh3pxd2a	NM_001164717	ENSMUSG00000053617	14218
Sidt2	NM_172257	ENSMUSG00000034908	214597
Sirt2	NM_001122765	ENSMUSG00000015149	64383
Slc11a2	NM_001146161	ENSMUSG00000023030	18174
Slc1a2	NM_001077514	ENSMUSG00000005089	20511
Slc1a4	NM_018861	ENSMUSG00000020142	55963
Slc22a6	NM_008766	ENSMUSG00000024650	18399
Slc25a4	NM_007450	ENSMUSG00000031633	11739
Slc30a4	NM_011774	ENSMUSG00000005802	22785
Slc31a1	NM_175090	ENSMUSG00000066150	20529
Slc44a1	NM_001159633	ENSMUSG00000028412	100434
Slc6a11	NM_172890	ENSMUSG00000030307	243616
Slc6a12	NM_133661	ENSMUSG00000030109	14411
Slc6a6	NM_009320	ENSMUSG00000030096	21366
Slc7a11	NM_011990	ENSMUSG00000027737	26570
Slc7a5	NM_011404	ENSMUSG00000040010	20539
Slco1c1	NM_001177772	ENSMUSG00000030235	58807
Slco2b1	NM_001252530	ENSMUSG00000030737	101488
Slk	NM_001164639	ENSMUSG00000025060	20874
Smad5	NM_001164041	ENSMUSG00000021540	17129
Smarcd1	NM_031842	ENSMUSG00000023018	83797
Snph	NM_198214	ENSMUSG00000027457	241727
Sp1	NM_013672	ENSMUSG00000001280	20683
Sparc	NM_009242	ENSMUSG00000018593	20692
Spcs3	NM_029701	ENSMUSG00000054408	76687
Sphk2	NM_001172561	ENSMUSG00000057342	56632
Spock2	NM_052994	ENSMUSG00000058297	94214
Srgap2	NM_001081011	ENSMUSG00000026425	14270
Stk39	NM_016866	ENSMUSG00000027030	53416
Strn3	NM_001172098	ENSMUSG00000020954	94186
Stx1b	NM_024414	ENSMUSG00000030806	56216
Stx6	NM_021433	ENSMUSG00000026470	58244
Surf4	NM_011512	ENSMUSG00000014867	20932
Svep1	NM_022814	ENSMUSG00000028369	64817
Sycp3	NM_011517	ENSMUSG00000020059	20962
Syne2	NM_001005510	ENSMUSG00000063450	319565
Sypl	NM_013635	ENSMUSG00000020570	19027
Szrd1	NM_001277195	ENSMUSG00000040842	213491
Tanc2	NM_181071	ENSMUSG00000053580	77097
Tbc1d16	NM_172443	ENSMUSG00000039976	207592
Tceb3	NM_013736	ENSMUSG00000028668	27224
Tead1	NM_001166584	ENSMUSG00000055320	21676
Tek	NM_013690	ENSMUSG00000006386	21687
Tenc1	NM_153533	ENSMUSG00000037003	209039
Tfrc	NM_011638	ENSMUSG00000022797	22042
Tgfbr1	NM_009370	ENSMUSG00000007613	21812
Tgfbr2	NM_009371	ENSMUSG00000032440	21813
Tgoln1	NM_009443	ENSMUSG00000056429	22134
Thsd4	NM_001040426	ENSMUSG00000032289	207596
Timp2	NM_011594	ENSMUSG00000017466	21858
Timp3	NM_011595	ENSMUSG00000020044	21859
Tmbim6	NM_001171034	ENSMUSG00000023010	110213
Tmeff1	NM_021436	ENSMUSG00000028347	230157
Tmem132a	NM_133804	ENSMUSG00000024736	98170
Tmem164	NM_001199357	ENSMUSG00000047045	209497
Tmem208	NM_025486	ENSMUSG00000014856	66320
Tmem9b	NM_020050	ENSMUSG00000031021	56786
Tmtc1	NM_198967	ENSMUSG00000030306	387314
Tnk2	NM_001110147	ENSMUSG00000022791	51789
Tnks2	NM_001163635	ENSMUSG00000024811	74493
Tnpo1	NM_001048267	ENSMUSG00000009470	238799
Tpm3	NM_001253738	ENSMUSG00000027940	59069
Trim32	NM_001161782	ENSMUSG00000051675	69807
Trp53inp2	NM_178111	ENSMUSG00000038375	68728
Tsn	NM_011650	ENSMUSG00000026374	22099
Ttc28	NM_001267622	ENSMUSG00000033209	209683
Ttll12	NM_183017	ENSMUSG00000016757	223723
Ttyh3	NM_175274	ENSMUSG00000036565	78339
Tug1	NR_002321	ENSMUSG00000056579	544752
Uba6	NM_172712	ENSMUSG00000035898	231380
Ube2h	NM_001169576	ENSMUSG00000039159	22214
Ube2l3	NM_009456	ENSMUSG00000038965	22195
Ube3a	NM_001033962	ENSMUSG00000025326	22215
Ube4a	NM_145400	ENSMUSG00000059890	140630
Ubfd1	NM_138589	ENSMUSG00000030870	28018
Unk	NM_172569	ENSMUSG00000020770	217331
Uvrag	NM_178635	ENSMUSG00000035354	78610
Vasp	NM_009499	ENSMUSG00000030403	22323
Vat1l	NM_173016	ENSMUSG00000046844	270097
Vps26b	NM_178027	ENSMUSG00000031988	69091
Vps33b	NM_178070	ENSMUSG00000030534	233405
Zfhx3	NM_007496	ENSMUSG00000038872	11906
Zfp292	NM_013889	ENSMUSG00000039967	30046
Zfp318	NM_021346	ENSMUSG00000015597	57908
Zfp335	NM_199027	ENSMUSG00000039834	329559
Zfp36	NM_011756	ENSMUSG00000044786	22695
Zfp516	NM_001177464	ENSMUSG00000058881	329003
Zfp644	NM_026856	ENSMUSG00000049606	52397
Zfp704	NM_133218	ENSMUSG00000040209	170753
Zhx3	NM_177263	ENSMUSG00000035877	320799
