# Supplementary material for: Mov10 suppresses retroelements and regulates neuronal development and function in the developing brain
Source: BMC Biol. 2017 Jun 29;15:54. doi: 10.1186/s12915-017-0387-1 (PMC5492891; doi:10.1186/s12915-017-0387-1)
Supplement: Supplementary file 9 — RNA-seq of N2a WT undifferentiated versus WT differentiated N2a. (XLSX 5557 kb) [file 12915_2017_387_MOESM9_ESM.xlsx]

## Sheet: OK
test_id	gene_id	gene	locus	sample_2	sample_1	status	value_2	value_1	log2(fold_change)	test_stat	p_value	q_value	significant
ENSMUSG00000000001.4	ENSMUSG00000000001.4	Gnai3	chr3:108107279-108146146	WT_U	WT_D	OK	52.5405	50.2617	-0.0639705	0.374672	0.5928	0.824641	no
ENSMUSG00000000028.14	ENSMUSG00000000028.14	Cdc45	chr16:18780446-18835261	WT_U	WT_D	OK	32.7228	32.6077	-0.00508352	0.0212913	0.97515	0.989009	no
ENSMUSG00000000037.16	ENSMUSG00000000037.16	Scml2	chrX:161117192-161258213	WT_U	WT_D	OK	6.68094	5.69158	-0.231222	0.630529	0.34185	0.608378	no
ENSMUSG00000000049.11	ENSMUSG00000000049.11	Apoh	chr11:107933386-108414396	WT_U	WT_D	OK	0.0394979	0.103277	1.38667	-0.194541	0.36285	0.630705	no
ENSMUSG00000000056.7	ENSMUSG00000000056.7	Narf	chr11:121237252-121255856	WT_U	WT_D	OK	6.06142	3.54251	-0.774884	3.78495	5e-05	0.00046241	yes
ENSMUSG00000000078.6	ENSMUSG00000000078.6	Klf6	chr13:5861488-5870393	WT_U	WT_D	OK	21.832	21.6658	-0.0110248	0.0643838	0.9281	0.974465	no
ENSMUSG00000000088.6	ENSMUSG00000000088.6	Cox5a	chr9:57521231-57543187	WT_U	WT_D	OK	242.907	220.027	-0.142723	0.765662	0.27545	0.53099	no
ENSMUSG00000000093.6	ENSMUSG00000000093.6	Tbx2	chr11:85832550-85841948	WT_U	WT_D	OK	11.7553	8.92727	-0.39702	2.0182	0.00365	0.0197639	yes
ENSMUSG00000000094.12	ENSMUSG00000000094.12	Tbx4	chr11:85886421-85916097	WT_U	WT_D	OK	1.10842	1.00538	-0.140764	0.604759	0.3873	0.65633	no
ENSMUSG00000000120.6	ENSMUSG00000000120.6	Ngfr	chr11:95568817-95587735	WT_U	WT_D	OK	93.5808	74.3631	-0.331626	1.93892	0.00645	0.0317759	yes
ENSMUSG00000000125.5	ENSMUSG00000000125.5	Wnt3	chr11:103774149-103817957	WT_U	WT_D	OK	2.20987	3.02174	0.451418	-2.13722	0.0023	0.0133873	yes
ENSMUSG00000000126.11	ENSMUSG00000000126.11	Wnt9a	chr11:59306927-59333552	WT_U	WT_D	OK	0.348958	0.479135	0.457379	-1.67115	0.0171	0.0700235	no
ENSMUSG00000000127.14	ENSMUSG00000000127.14	Fer	chr17:63896017-64139494	WT_U	WT_D	OK	17.575	16.8157	-0.0637159	0.326405	0.6376	0.852268	no
ENSMUSG00000000131.15	ENSMUSG00000000131.15	Xpo6	chr7:126101714-126200501	WT_U	WT_D	OK	28.3736	26.5241	-0.0972454	0.400102	0.49625	0.75392	no
ENSMUSG00000000134.17	ENSMUSG00000000134.17	Tfe3	chrX:7762559-7775202	WT_U	WT_D	OK	18.6426	23.5048	0.334352	-0.873069	0.18705	0.415803	no
ENSMUSG00000000142.15	ENSMUSG00000000142.15	Axin2	chr11:108920348-108950783	WT_U	WT_D	OK	3.73627	4.2741	0.194022	-0.690852	0.30195	0.562999	no
ENSMUSG00000000148.17	ENSMUSG00000000148.17	Brat1	chr5:140705010-140719379	WT_U	WT_D	OK	12.7678	13.3139	0.0604233	-0.302434	0.6706	0.871914	no
ENSMUSG00000000149.10	ENSMUSG00000000149.10	Gna12	chr5:140724126-140830431	WT_U	WT_D	OK	24.582	28.7564	0.226281	-1.28119	0.06415	0.194308	no
ENSMUSG00000000154.15	ENSMUSG00000000154.15	Slc22a18	chr7:143473720-143499334	WT_U	WT_D	OK	0.948369	0.99738	0.0726948	-0.125644	0.8572	0.952851	no
ENSMUSG00000000159.15	ENSMUSG00000000159.15	Igsf5	chr16:96361667-96525793	WT_U	WT_D	OK	0.485141	0.521173	0.103358	-0.0666146	0.9291	0.974695	no
ENSMUSG00000000167.14	ENSMUSG00000000167.14	Pih1d2	chr9:50603900-50625000	WT_U	WT_D	OK	2.94959	2.53867	-0.216442	0.214185	0.72825	0.902717	no
ENSMUSG00000000168.9	ENSMUSG00000000168.9	Dlat	chr9:50634632-50659780	WT_U	WT_D	OK	46.6665	46.5089	-0.00488045	0.0189943	0.97585	0.989148	no
ENSMUSG00000000171.4	ENSMUSG00000000171.4	Sdhd	chr9:50596337-50603849	WT_U	WT_D	OK	94.7292	74.8404	-0.339992	1.98507	0.0043	0.0226542	yes
ENSMUSG00000000184.12	ENSMUSG00000000184.12	Ccnd2	chr6:127122965-127212411	WT_U	WT_D	OK	0.185401	0.291079	0.650762	-0.678122	0.1271	0.31968	no
ENSMUSG00000000194.13	ENSMUSG00000000194.13	Gpr107	chr2:31152315-31218775	WT_U	WT_D	OK	20.3688	18.2492	-0.158528	0.57056	0.3371	0.603149	no
ENSMUSG00000000202.9	ENSMUSG00000000202.9	Btbd17	chr11:114791216-114795945	WT_U	WT_D	OK	0.0992665	0.0612123	-0.697485	0.489303	0.24685	0.496281	no
ENSMUSG00000000204.15	ENSMUSG00000000204.15	Slfn4	chr11:83175185-83190221	WT_U	WT_D	OK	0.0598919	0.0861849	0.525074	-1.14603	0.1032	0.275311	no
ENSMUSG00000000214.10	ENSMUSG00000000214.10	Th	chr7:142892751-142931128	WT_U	WT_D	OK	1.84539	1.45912	-0.338827	1.4102	0.04235	0.142148	no
ENSMUSG00000000223.13	ENSMUSG00000000223.13	Drp2	chrX:134404550-134456573	WT_U	WT_D	OK	0.689688	0.818478	0.247	-1.04168	0.13255	0.328799	no
ENSMUSG00000000244.16	ENSMUSG00000000244.16	Tspan32	chr7:142988968-143019644	WT_U	WT_D	OK	0.0932845	0.0590382	-0.659989	0.480816	0.27315	0.528355	no
ENSMUSG00000000247.11	ENSMUSG00000000247.11	Lhx2	chr2:38339280-38369733	WT_U	WT_D	OK	1.84557	2.04704	0.149473	-0.60208	0.37165	0.640303	no
ENSMUSG00000000253.12	ENSMUSG00000000253.12	Gmpr	chr13:45507443-45546382	WT_U	WT_D	OK	8.63107	6.25952	-0.463487	2.17349	0.0013	0.00823191	yes
ENSMUSG00000000266.11	ENSMUSG00000000266.11	Mid2	chrX:140664598-140767715	WT_U	WT_D	OK	4.89337	4.57687	-0.0964671	0.384264	0.5426	0.790155	no
ENSMUSG00000000275.16	ENSMUSG00000000275.16	Trim25	chr11:88999375-89020293	WT_U	WT_D	OK	16.1279	15.2479	-0.080948	0.381412	0.57555	0.813658	no
ENSMUSG00000000276.11	ENSMUSG00000000276.11	Dgke	chr11:89035178-89069098	WT_U	WT_D	OK	4.13174	3.81441	-0.11529	0.556	0.42865	0.695907	no
ENSMUSG00000000278.10	ENSMUSG00000000278.10	Scpep1	chr11:88905927-88955465	WT_U	WT_D	OK	58.3994	78.6192	0.428928	-2.5072	0.00035	0.00265006	yes
ENSMUSG00000000282.12	ENSMUSG00000000282.12	Mnt	chr11:74830919-74845725	WT_U	WT_D	OK	16.6366	19.6668	0.241402	-0.832144	0.2288	0.473317	no
ENSMUSG00000000290.13	ENSMUSG00000000290.13	Itgb2	chr10:77530251-77565708	WT_U	WT_D	OK	0.0855821	0.526577	2.62126	-4.67504	5e-05	0.00046241	yes
ENSMUSG00000000295.12	ENSMUSG00000000295.12	Hddc2	chr10:31313381-31328204	WT_U	WT_D	OK	35.4605	31.0694	-0.190718	0.947883	0.17415	0.396243	no
ENSMUSG00000000296.7	ENSMUSG00000000296.7	Tpd52l1	chr10:31332379-31445921	WT_U	WT_D	OK	1.12156	1.15064	0.0369297	-0.133623	0.8504	0.950491	no
ENSMUSG00000000301.16	ENSMUSG00000000301.16	Pemt	chr11:59970613-60046489	WT_U	WT_D	OK	11.1347	12.9855	0.221839	-0.862991	0.20985	0.448687	no
ENSMUSG00000000303.12	ENSMUSG00000000303.12	Cdh1	chr8:106603350-106670246	WT_U	WT_D	OK	0.0791798	0.0739987	-0.0976325	0.187909	0.7578	0.915366	no
ENSMUSG00000000308.14	ENSMUSG00000000308.14	Ckmt1	chr2:121357713-121387168	WT_U	WT_D	OK	6.75931	4.48516	-0.591717	2.75745	5e-05	0.00046241	yes
ENSMUSG00000000317.11	ENSMUSG00000000317.11	Bcl6b	chr11:70224127-70229798	WT_U	WT_D	OK	0.387092	0.293965	-0.397032	0.979264	0.1134	0.294967	no
ENSMUSG00000000325.15	ENSMUSG00000000325.15	Arvcf	chr16:18348181-18479073	WT_U	WT_D	OK	22.3611	30.8188	0.46282	-1.45251	0.0186	0.0748204	no
ENSMUSG00000000326.12	ENSMUSG00000000326.12	Comt	chr16:18348181-18479073	WT_U	WT_D	OK	34.1703	33.8543	-0.0134038	0.0392596	0.9561	0.982921	no
ENSMUSG00000000339.14	ENSMUSG00000000339.14	Rtca	chr3:116488962-116508208	WT_U	WT_D	OK	34.0477	32.2497	-0.0782716	0.365954	0.5977	0.827906	no
ENSMUSG00000000340.10	ENSMUSG00000000340.10	Dbt	chr3:116513069-116549981	WT_U	WT_D	OK	13.1391	10.4155	-0.335134	1.25502	0.04025	0.136596	no
ENSMUSG00000000346.8	ENSMUSG00000000346.8	Dazap2	chr15:100615627-100620731	WT_U	WT_D	OK	77.0826	77.097	0.000269488	-0.00158459	0.9983	0.999128	no
ENSMUSG00000000355.13	ENSMUSG00000000355.13	Mcts1	chrX:38600577-38613426	WT_U	WT_D	OK	24.6247	25.6796	0.0605166	-0.291255	0.67425	0.873635	no
ENSMUSG00000000359.3	ENSMUSG00000000359.3	Rem1	chr2:152626950-152635198	WT_U	WT_D	OK	0.313766	0.230354	-0.445836	1.01517	0.12355	0.313585	no
ENSMUSG00000000365.8	ENSMUSG00000000365.8	Rnf17	chr14:56402696-56525032	WT_U	WT_D	OK	0.119081	0.121656	0.0308642	-0.092263	0.8954	0.964238	no
ENSMUSG00000000374.7	ENSMUSG00000000374.7	Trappc10	chr10:78186724-78244642	WT_U	WT_D	OK	17.2205	16.8973	-0.0273343	0.159537	0.81575	0.938501	no
ENSMUSG00000000378.15	ENSMUSG00000000378.15	Ccm2	chr11:6546886-6596744	WT_U	WT_D	OK	15.4433	16.4591	0.0919044	-0.41399	0.5334	0.783258	no
ENSMUSG00000000384.15	ENSMUSG00000000384.15	Tbrg4	chr11:6615597-6626067	WT_U	WT_D	OK	59.156	54.5121	-0.117948	0.498204	0.47245	0.733772	no
ENSMUSG00000000386.14	ENSMUSG00000000386.14	Mx1	chr16:97447034-97462907	WT_U	WT_D	OK	0.318147	1.11825	1.81348	-5.12957	5e-05	0.00046241	yes
ENSMUSG00000000399.10	ENSMUSG00000000399.10	Ndufa9	chr6:126821720-126849136	WT_U	WT_D	OK	84.9252	83.7675	-0.0198021	0.115287	0.86695	0.955768	no
ENSMUSG00000000402.2	ENSMUSG00000000402.2	Egfl6	chrX:166523006-166585720	WT_U	WT_D	OK	0.0865453	0.0773769	-0.161553	0.3274	0.6436	0.855915	no
ENSMUSG00000000409.14	ENSMUSG00000000409.14	Lck	chr4:129548343-129573641	WT_U	WT_D	OK	19.7073	34.2224	0.796211	-2.9677	5e-05	0.00046241	yes
ENSMUSG00000000416.16	ENSMUSG00000000416.16	Cttnbp2	chr6:18366477-18514843	WT_U	WT_D	OK	0.442667	0.384112	-0.204695	0.56577	0.3316	0.596922	no
ENSMUSG00000000420.15	ENSMUSG00000000420.15	Galnt1	chr18:24205343-24286818	WT_U	WT_D	OK	45.0935	35.4486	-0.347191	1.54679	0.02525	0.0951564	no
ENSMUSG00000000439.9	ENSMUSG00000000439.9	Mkrn2	chr6:115601901-115677780	WT_U	WT_D	OK	19.2677	19.6263	0.0266039	-0.0298442	0.96445	0.98581	no
ENSMUSG00000000440.12	ENSMUSG00000000440.12	Pparg	chr6:115360950-115490399	WT_U	WT_D	OK	5.86211	10.5055	0.841653	-2.49863	5e-05	0.00046241	yes
ENSMUSG00000000441.17	ENSMUSG00000000441.17	Raf1	chr6:115601901-115677780	WT_U	WT_D	OK	50.0115	50.6277	0.0176671	-0.0739293	0.9121	0.969262	no
ENSMUSG00000000486.13	ENSMUSG00000000486.13	Sept1	chr7:127214446-127238179	WT_U	WT_D	OK	2.76399	2.3231	-0.250701	0.184203	0.78655	0.927594	no
ENSMUSG00000000489.6	ENSMUSG00000000489.6	Pdgfb	chr15:79995899-80014808	WT_U	WT_D	OK	0.109625	0.112093	0.0321193	-0.0759738	0.9199	0.971749	no
ENSMUSG00000000530.16	ENSMUSG00000000530.16	Acvrl1	chr15:101128521-101145336	WT_U	WT_D	OK	0.988849	0.247976	-1.99555	2.36005	0.0001	0.000870202	yes
ENSMUSG00000000531.4	ENSMUSG00000000531.4	Grasp	chr15:101224206-101232755	WT_U	WT_D	OK	9.33606	7.04576	-0.406058	2.00755	0.0052	0.0265674	yes
ENSMUSG00000000532.10	ENSMUSG00000000532.10	Acvr1b	chr15:101174066-101213679	WT_U	WT_D	OK	11.4577	10.9956	-0.0593911	0.304076	0.66085	0.866481	no
ENSMUSG00000000538.18	ENSMUSG00000000538.18	Tom1l2	chr11:60226713-60352905	WT_U	WT_D	OK	14.1131	16.0539	0.185889	-0.905514	0.1688	0.387831	no
ENSMUSG00000000552.9	ENSMUSG00000000552.9	Zfp385a	chr15:103313894-103340086	WT_U	WT_D	OK	12.2857	10.7051	-0.198682	1.00104	0.14985	0.358138	no
ENSMUSG00000000555.6	ENSMUSG00000000555.6	Itga5	chr15:103344288-103366763	WT_U	WT_D	OK	2.54409	1.67039	-0.606965	2.90403	5e-05	0.00046241	yes
ENSMUSG00000000561.14	ENSMUSG00000000561.14	Wdr77	chr3:105942697-105987423	WT_U	WT_D	OK	55.3785	58.4971	0.0790391	-0.187334	0.77705	0.92369	no
ENSMUSG00000000563.17	ENSMUSG00000000563.17	Atp5f1	chr3:105942697-105987423	WT_U	WT_D	OK	251.712	218.792	-0.202214	0.939293	0.17	0.389766	no
ENSMUSG00000000567.5	ENSMUSG00000000567.5	Sox9	chr11:112782223-112787760	WT_U	WT_D	OK	15.9287	10.0684	-0.661794	3.59119	5e-05	0.00046241	yes
ENSMUSG00000000568.15	ENSMUSG00000000568.15	Hnrnpd	chr5:99955934-99978938	WT_U	WT_D	OK	361.811	333.184	-0.118917	0.519853	0.4575	0.721673	no
ENSMUSG00000000579.14	ENSMUSG00000000579.14	Dynlt1c	chr17:6601670-6609774	WT_U	WT_D	OK	2.31034	2.59583	0.168091	-0.440707	0.52265	0.775048	no
ENSMUSG00000000581.8	ENSMUSG00000000581.8	C1d	chr11:17257578-17269176	WT_U	WT_D	OK	41.9967	39.2684	-0.0969072	0.227372	0.74125	0.908351	no
ENSMUSG00000000594.7	ENSMUSG00000000594.7	Gm2a	chr11:55098114-55113029	WT_U	WT_D	OK	3.82079	2.99964	-0.349082	1.71898	0.01335	0.0574153	no
ENSMUSG00000000600.15	ENSMUSG00000000600.15	Krit1	chr5:3803183-3866596	WT_U	WT_D	OK	29.4936	33.01	0.162501	-0.848768	0.2027	0.438973	no
ENSMUSG00000000605.8	ENSMUSG00000000605.8	Clcn4	chr7:7282315-7299511	WT_U	WT_D	OK	14.2248	17.1591	0.270566	-1.57544	0.02355	0.0901261	no
ENSMUSG00000000627.15	ENSMUSG00000000627.15	Sema4f	chr6:82911884-82939769	WT_U	WT_D	OK	0.46595	0.519619	0.157279	-0.408913	0.4625	0.72538	no
ENSMUSG00000000628.10	ENSMUSG00000000628.10	Hk2	chr6:82725024-82774454	WT_U	WT_D	OK	38.1006	30.7684	-0.308364	1.70428	0.01165	0.0514489	no
ENSMUSG00000000631.19	ENSMUSG00000000631.19	Myo18a	chr11:77763245-77865980	WT_U	WT_D	OK	19.9878	20.6904	0.0498418	-0.115187	0.8606	0.953869	no
ENSMUSG00000000632.13	ENSMUSG00000000632.13	Sez6	chr11:77930799-77979048	WT_U	WT_D	OK	18.9763	17.6514	-0.104416	0.314196	0.6517	0.860678	no
ENSMUSG00000000686.11	ENSMUSG00000000686.11	Abhd15	chr11:77508098-77607815	WT_U	WT_D	OK	1.04872	1.36795	0.383386	-0.219252	0.7558	0.914449	no
ENSMUSG00000000693.10	ENSMUSG00000000693.10	Loxl3	chr6:83034172-83057808	WT_U	WT_D	OK	1.54895	1.24937	-0.31009	0.150949	0.6587	0.864975	no
ENSMUSG00000000708.14	ENSMUSG00000000708.14	Kat2b	chr17:53566860-53672720	WT_U	WT_D	OK	15.3621	13.9915	-0.134825	0.301111	0.6237	0.843967	no
ENSMUSG00000000711.2	ENSMUSG00000000711.2	Rab5b	chr10:128677192-128696268	WT_U	WT_D	OK	28.4157	30.9989	0.125529	-0.733037	0.2963	0.556128	no
ENSMUSG00000000730.13	ENSMUSG00000000730.13	Dnmt3l	chr10:78030021-78063622	WT_U	WT_D	OK	0.0303538	0.570378	4.23197	-1.8317	0.0001	0.000870202	yes
ENSMUSG00000000731.15	ENSMUSG00000000731.15	Aire	chr10:78030021-78063622	WT_U	WT_D	OK	0.114148	0.00498251	-4.51789	0.701493	5e-05	0.00046241	yes
ENSMUSG00000000732.8	ENSMUSG00000000732.8	Icosl	chr10:78069359-78079525	WT_U	WT_D	OK	2.91364	2.58206	-0.1743	0.819454	0.2442	0.492713	no
ENSMUSG00000000751.13	ENSMUSG00000000751.13	Rpa1	chr11:75298165-75348324	WT_U	WT_D	OK	59.7733	51.8727	-0.204526	0.906855	0.19305	0.42488	no
ENSMUSG00000000753.15	ENSMUSG00000000753.15	Serpinf1	chr11:75409768-75422701	WT_U	WT_D	OK	14.5589	19.7719	0.44155	-1.82576	0.0085	0.0398455	yes
ENSMUSG00000000759.14	ENSMUSG00000000759.14	Tubgcp3	chr8:12614276-12679229	WT_U	WT_D	OK	62.5462	53.9844	-0.21238	0.537815	0.4095	0.678067	no
ENSMUSG00000000776.12	ENSMUSG00000000776.12	Polr3d	chr14:70438747-70443471	WT_U	WT_D	OK	23.2974	22.8279	-0.0293708	0.150757	0.83255	0.944308	no
ENSMUSG00000000782.15	ENSMUSG00000000782.15	Tcf7	chr11:51949881-52286179	WT_U	WT_D	OK	3.66087	4.59118	0.326678	-0.183763	0.82245	0.940658	no
ENSMUSG00000000787.12	ENSMUSG00000000787.12	Ddx3x	chrX:13280969-13294052	WT_U	WT_D	OK	244.299	227.698	-0.101526	0.358676	0.60865	0.835084	no
ENSMUSG00000000792.2	ENSMUSG00000000792.2	Slc5a5	chr8:70882888-70892757	WT_U	WT_D	OK	0.416493	0.286258	-0.540976	1.84194	0.00935	0.0430664	yes
ENSMUSG00000000794.9	ENSMUSG00000000794.9	Kcnn3	chr3:89520163-89675132	WT_U	WT_D	OK	3.95755	1.88747	-1.06815	4.50227	5e-05	0.00046241	yes
ENSMUSG00000000804.14	ENSMUSG00000000804.14	Usp32	chr11:84984441-85140161	WT_U	WT_D	OK	20.4167	20.3453	-0.00505415	0.00944072	0.9894	0.994801	no
ENSMUSG00000000811.13	ENSMUSG00000000811.13	Txnrd3	chr6:89643987-89675529	WT_U	WT_D	OK	11.4524	11.2928	-0.0202467	0.102704	0.87845	0.95941	no
ENSMUSG00000000817.10	ENSMUSG00000000817.10	Fasl	chr1:161780688-161788495	WT_U	WT_D	OK	0.0613443	0.0923666	0.590442	-0.379901	0.5699	0.810393	no
ENSMUSG00000000823.16	ENSMUSG00000000823.16	Znf512b	chr2:181569148-181655660	WT_U	WT_D	OK	22.466	25.0124	0.1549	-0.292027	0.6382	0.852581	no
ENSMUSG00000000826.16	ENSMUSG00000000826.16	Dnajc5	chr2:181520484-181555133	WT_U	WT_D	OK	30.5532	27.6955	-0.141672	0.65157	0.33755	0.603631	no
ENSMUSG00000000827.18	ENSMUSG00000000827.18	Tpd52l2	chr2:181497141-181517966	WT_U	WT_D	OK	84.1261	84.2195	0.00160085	-0.00775474	0.99075	0.995429	no
ENSMUSG00000000838.17	ENSMUSG00000000838.17	Fmr1	chrX:68678484-68717963	WT_U	WT_D	OK	35.8944	32.8267	-0.128889	0.53546	0.4313	0.698015	no
ENSMUSG00000000861.15	ENSMUSG00000000861.15	Bcl11a	chr11:24078055-24174123	WT_U	WT_D	OK	6.39482	7.10688	0.152313	-0.654915	0.33575	0.60184	no
ENSMUSG00000000876.11	ENSMUSG00000000876.11	Pxmp4	chr2:154585757-154603708	WT_U	WT_D	OK	4.12456	3.48692	-0.242287	0.823844	0.2362	0.482961	no
ENSMUSG00000000881.12	ENSMUSG00000000881.12	Dlg3	chrX:100767721-100818410	WT_U	WT_D	OK	1.93704	1.36935	-0.500363	1.15039	0.08445	0.238123	no
ENSMUSG00000000884.16	ENSMUSG00000000884.16	Gnb1l	chr16:18498767-18566679	WT_U	WT_D	OK	2.98374	2.9438	-0.0194422	0.0495204	0.93575	0.976864	no
ENSMUSG00000000889.8	ENSMUSG00000000889.8	Dbh	chr2:27165232-27183200	WT_U	WT_D	OK	3.96222	2.40962	-0.717503	3.13757	5e-05	0.00046241	yes
ENSMUSG00000000901.15	ENSMUSG00000000901.15	Mmp11	chr10:75923221-75932502	WT_U	WT_D	OK	10.6846	18.4633	0.789128	-3.49534	5e-05	0.00046241	yes
ENSMUSG00000000902.13	ENSMUSG00000000902.13	Smarcb1	chr10:75896768-75921617	WT_U	WT_D	OK	84.0354	102.055	0.280278	-1.56931	0.0257	0.0965074	no
ENSMUSG00000000903.3	ENSMUSG00000000903.3	Vpreb3	chr10:75943056-75949657	WT_U	WT_D	OK	0.236481	0.325909	0.462745	-0.783404	0.2646	0.518149	no
ENSMUSG00000000915.15	ENSMUSG00000000915.15	Hip1r	chr5:123973627-124032270	WT_U	WT_D	OK	6.92512	6.1006	-0.182888	0.352374	0.6115	0.836771	no
ENSMUSG00000000916.15	ENSMUSG00000000916.15	Nsun5	chr5:135369952-135394546	WT_U	WT_D	OK	14.721	14.6448	-0.00748719	0.0125886	0.98365	0.992156	no
ENSMUSG00000000934.8	ENSMUSG00000000934.8	Top1mt	chr15:75657034-75678800	WT_U	WT_D	OK	14.7006	15.2167	0.0497805	-0.251318	0.7191	0.898281	no
ENSMUSG00000000948.16	ENSMUSG00000000948.16	Gm38393	chr7:59937370-60140219	WT_U	WT_D	OK	6.66718	6.36336	-0.0672879	0.0692179	0.88935	0.962429	no
ENSMUSG00000000958.9	ENSMUSG00000000958.9	Slc7a7	chr14:54360840-54417780	WT_U	WT_D	OK	1.42424	1.62346	0.18888	-0.148849	0.75935	0.915902	no
ENSMUSG00000000959.6	ENSMUSG00000000959.6	Oxa1l	chr14:54360840-54417780	WT_U	WT_D	OK	22.2946	23.5551	0.0793451	-0.357321	0.60915	0.835393	no
ENSMUSG00000000976.13	ENSMUSG00000000976.13	Heatr6	chr11:83753695-83783754	WT_U	WT_D	OK	8.35619	9.03008	0.111893	-0.429607	0.4574	0.721606	no
ENSMUSG00000001014.5	ENSMUSG00000001014.5	Icam4	chr9:21029372-21030531	WT_U	WT_D	OK	0.64364	0.270449	-1.2509	2.82375	0.00095	0.00629407	yes
ENSMUSG00000001016.12	ENSMUSG00000001016.12	Ilf2	chr3:90476125-90491033	WT_U	WT_D	OK	107.756	102.418	-0.0732989	0.400944	0.5682	0.809067	no
ENSMUSG00000001017.15	ENSMUSG00000001017.15	Chtop	chr3:90498955-90509498	WT_U	WT_D	OK	63.8581	66.7893	0.0647474	-0.362491	0.61285	0.837715	no
ENSMUSG00000001018.15	ENSMUSG00000001018.15	Snapin	chr3:90476125-90491033	WT_U	WT_D	OK	11.3931	12.9766	0.187752	-0.284017	0.6986	0.887601	no
ENSMUSG00000001020.8	ENSMUSG00000001020.8	S100a4	chr3:90560555-90606045	WT_U	WT_D	OK	15.5086	4.6188	-1.74748	6.70341	5e-05	0.00046241	yes
ENSMUSG00000001021.12	ENSMUSG00000001021.12	S100a3	chr3:90560555-90606045	WT_U	WT_D	OK	0.214323	0.222654	0.0550168	-0.0419816	0.9465	0.980091	no
ENSMUSG00000001025.8	ENSMUSG00000001025.8	S100a6	chr3:90612881-90624181	WT_U	WT_D	OK	92.7309	46.9917	-0.980644	4.92132	5e-05	0.00046241	yes
ENSMUSG00000001027.7	ENSMUSG00000001027.7	Scn4a	chr11:106318591-106349389	WT_U	WT_D	OK	0.834472	0.6757	-0.304481	1.16985	0.3933	0.662353	no
ENSMUSG00000001029.15	ENSMUSG00000001029.15	Icam2	chr11:106377655-106388075	WT_U	WT_D	OK	17.5114	13.2851	-0.398485	1.90271	0.00595	0.0296952	yes
ENSMUSG00000001034.17	ENSMUSG00000001034.17	Mapk7	chr11:61485430-61494406	WT_U	WT_D	OK	20.8117	20.9645	0.0105536	-0.0365227	0.9573	0.983347	no
ENSMUSG00000001036.17	ENSMUSG00000001036.17	Epn2	chr11:61517248-61579687	WT_U	WT_D	OK	24.2533	24.3054	0.00309582	-0.00823544	0.9896	0.994922	no
ENSMUSG00000001039.12	ENSMUSG00000001039.12	B9d1	chr11:61505143-61512931	WT_U	WT_D	OK	9.57646	11.9065	0.314185	-1.39924	0.045	0.148814	no
ENSMUSG00000001052.15	ENSMUSG00000001052.15	Sec24b	chr3:129982758-130061553	WT_U	WT_D	OK	38.7502	36.6871	-0.0789309	0.254705	0.69405	0.885176	no
ENSMUSG00000001053.15	ENSMUSG00000001053.15	N4bp3	chr11:51643062-51650842	WT_U	WT_D	OK	9.07893	6.83426	-0.409737	1.94592	0.00435	0.0228744	yes
ENSMUSG00000001054.9	ENSMUSG00000001054.9	Rmnd5b	chr11:51619734-51635896	WT_U	WT_D	OK	9.03151	9.76215	0.112232	-0.172356	0.7767	0.923565	no
ENSMUSG00000001056.3	ENSMUSG00000001056.3	Nhp2	chr11:51619734-51635896	WT_U	WT_D	OK	201.089	185.075	-0.119724	0.666401	0.34105	0.607429	no
ENSMUSG00000001076.6	ENSMUSG00000001076.6	C1ql4	chr15:99084685-99087817	WT_U	WT_D	OK	0.340698	0.361202	0.0843124	-0.18065	0.79855	0.932099	no
ENSMUSG00000001082.12	ENSMUSG00000001082.12	Mfsd10	chr5:34633641-34637212	WT_U	WT_D	OK	30.1267	30.7828	0.0310818	-0.115269	0.85505	0.951908	no
ENSMUSG00000001089.14	ENSMUSG00000001089.14	Luzp1	chr4:136469760-136602723	WT_U	WT_D	OK	33.2609	27.0674	-0.297271	0.897121	0.1271	0.31968	no
ENSMUSG00000001098.15	ENSMUSG00000001098.15	Kctd10	chr5:114289165-114380508	WT_U	WT_D	OK	28.7394	27.9744	-0.0389228	0.189375	0.78295	0.926139	no
ENSMUSG00000001100.10	ENSMUSG00000001100.10	Poldip2	chr11:78512192-78522736	WT_U	WT_D	OK	34.7217	38.8179	0.160884	-0.829177	0.2169	0.458226	no
ENSMUSG00000001105.15	ENSMUSG00000001105.15	Ift20	chr11:78536360-78541737	WT_U	WT_D	OK	36.8303	35.9464	-0.0350459	0.161032	0.81585	0.938573	no
ENSMUSG00000001119.7	ENSMUSG00000001119.7	Col6a1	chr10:76708791-76726168	WT_U	WT_D	OK	1.57292	0.916479	-0.779272	3.50871	5e-05	0.00046241	yes
ENSMUSG00000001120.15	ENSMUSG00000001120.15	Pcbp3	chr10:76761856-76961887	WT_U	WT_D	OK	533.008	461.717	-0.207148	0.990231	0.15715	0.369903	no
ENSMUSG00000001123.15	ENSMUSG00000001123.15	Lgals9	chr11:78962973-78984946	WT_U	WT_D	OK	4.31839	3.09666	-0.479781	2.17367	0.0016	0.00983992	yes
ENSMUSG00000001127.12	ENSMUSG00000001127.12	Araf	chrX:20797813-20921004	WT_U	WT_D	OK	28.2707	33.6929	0.253137	-0.86797	0.1957	0.4288	no
ENSMUSG00000001128.7	ENSMUSG00000001128.7	Cfp	chrX:20925453-20931555	WT_U	WT_D	OK	1.47719	1.37295	-0.105576	0.254988	0.71165	0.894484	no
ENSMUSG00000001131.11	ENSMUSG00000001131.11	Timp1	chrX:20797813-20921004	WT_U	WT_D	OK	0.873361	0.806038	-0.11573	0.0474305	0.94925	0.981063	no
ENSMUSG00000001134.9	ENSMUSG00000001134.9	Uxt	chrX:20933394-20986737	WT_U	WT_D	OK	22.5022	24.2407	0.107365	-0.243747	0.73405	0.905308	no
ENSMUSG00000001138.13	ENSMUSG00000001138.13	Cnnm3	chr1:36511866-36528237	WT_U	WT_D	OK	7.1154	7.56102	0.087636	-0.253165	0.7057	0.891613	no
ENSMUSG00000001143.13	ENSMUSG00000001143.13	Lman2l	chr1:36372290-36445271	WT_U	WT_D	OK	22.7051	28.4246	0.324124	-1.36212	0.04975	0.160647	no
ENSMUSG00000001150.6	ENSMUSG00000001150.6	Mcm3ap	chr10:76449080-76515856	WT_U	WT_D	OK	13.5083	13.0088	-0.0543582	0.305577	0.66175	0.867116	no
ENSMUSG00000001151.9	ENSMUSG00000001151.9	Pcnt	chr10:76351253-76442912	WT_U	WT_D	OK	13.4078	12.43	-0.109246	0.63863	0.3646	0.632639	no
ENSMUSG00000001156.9	ENSMUSG00000001156.9	Mxd1	chr6:86647041-86669161	WT_U	WT_D	OK	1.78123	1.78159	0.00029155	-0.00102162	0.99855	0.999158	no
ENSMUSG00000001157.13	ENSMUSG00000001157.13	Gmcl1	chr6:86691767-86733383	WT_U	WT_D	OK	14.2824	14.1928	-0.00907919	0.0431289	0.94825	0.980768	no
ENSMUSG00000001158.13	ENSMUSG00000001158.13	Snrnp27	chr6:86675150-86684522	WT_U	WT_D	OK	76.5547	73.3518	-0.0616586	0.314673	0.64765	0.858328	no
ENSMUSG00000001166.17	ENSMUSG00000001166.17	Oas1c	chr5:120777795-120812514	WT_U	WT_D	OK	1.7034	1.38444	-0.299115	1.10472	0.0797	0.228178	no
ENSMUSG00000001173.15	ENSMUSG00000001173.15	Ocrl	chrX:47912386-47965868	WT_U	WT_D	OK	5.71127	5.72734	0.00405366	-0.0189602	0.9774	0.989848	no
ENSMUSG00000001175.13	ENSMUSG00000001175.13	Calm1	chr12:100199434-100209814	WT_U	WT_D	OK	270.68	268.636	-0.0109356	0.0357471	0.95985	0.984241	no
ENSMUSG00000001211.14	ENSMUSG00000001211.14	Agpat3	chr10:78269177-78352489	WT_U	WT_D	OK	76.3921	95.8071	0.326709	-1.39248	0.04435	0.147204	no
ENSMUSG00000001227.11	ENSMUSG00000001227.11	Sema6b	chr17:56123084-56140343	WT_U	WT_D	OK	1.33772	0.823959	-0.699132	3.08682	5e-05	0.00046241	yes
ENSMUSG00000001228.14	ENSMUSG00000001228.14	Uhrf1	chr17:56303320-56323486	WT_U	WT_D	OK	102.09	87.007	-0.230638	0.802809	0.2336	0.479612	no
ENSMUSG00000001229.7	ENSMUSG00000001229.7	Dpp9	chr17:56186681-56218889	WT_U	WT_D	OK	25.5341	26.8118	0.0704429	-0.411046	0.56265	0.805238	no
ENSMUSG00000001240.13	ENSMUSG00000001240.13	Ramp2	chr11:101246027-101259549	WT_U	WT_D	OK	20.7193	10.1455	-1.03014	1.88918	0.01205	0.0528728	no
ENSMUSG00000001248.14	ENSMUSG00000001248.14	Gramd1a	chr7:31130126-31170641	WT_U	WT_D	OK	37.86	42.4283	0.164352	-0.878129	0.18605	0.414334	no
ENSMUSG00000001249.14	ENSMUSG00000001249.14	Hpn	chr7:31098724-31115290	WT_U	WT_D	OK	1.22863	1.43421	0.223206	-0.58404	0.3946	0.663672	no
ENSMUSG00000001270.8	ENSMUSG00000001270.8	Ckb	chr12:111669354-111672338	WT_U	WT_D	OK	11.7257	10.193	-0.202095	0.997562	0.15285	0.363013	no
ENSMUSG00000001280.12	ENSMUSG00000001280.12	Sp1	chr15:102406142-102436404	WT_U	WT_D	OK	29.6087	28.2527	-0.0676324	0.271433	0.5943	0.82573	no
ENSMUSG00000001281.9	ENSMUSG00000001281.9	Itgb7	chr15:102215994-102231935	WT_U	WT_D	OK	0.110629	0.105492	-0.068596	0.123359	0.83945	0.946835	no
ENSMUSG00000001285.12	ENSMUSG00000001285.12	Myg1	chr15:102326115-102338139	WT_U	WT_D	OK	67.4688	66.7733	-0.0149492	0.0436876	0.9514	0.981594	no
ENSMUSG00000001288.14	ENSMUSG00000001288.14	Rarg	chr15:102234937-102257517	WT_U	WT_D	OK	5.51297	4.58834	-0.264857	1.01076	0.13465	0.332477	no
ENSMUSG00000001289.12	ENSMUSG00000001289.12	Pfdn5	chr15:102326115-102338139	WT_U	WT_D	OK	232.264	218.073	-0.0909544	0.349045	0.61405	0.838394	no
ENSMUSG00000001300.15	ENSMUSG00000001300.15	Efnb2	chr8:8617433-8660773	WT_U	WT_D	OK	0.904745	1.03479	0.193755	-0.854274	0.21535	0.456154	no
ENSMUSG00000001305.5	ENSMUSG00000001305.5	Rrp15	chr1:186720977-186749358	WT_U	WT_D	OK	102.181	104.989	0.0391112	-0.227281	0.74325	0.908979	no
ENSMUSG00000001313.12	ENSMUSG00000001313.12	Rnd2	chr11:101458744-101471853	WT_U	WT_D	OK	26.4717	32.5176	0.29677	-0.551163	0.4219	0.689709	no
ENSMUSG00000001323.17	ENSMUSG00000001323.17	Srr	chr11:74898070-75164448	WT_U	WT_D	OK	4.78878	5.63526	0.234824	-0.19685	0.7463	0.910309	no
ENSMUSG00000001333.9	ENSMUSG00000001333.9	Sync	chr4:129287616-129335370	WT_U	WT_D	OK	2.99133	2.99771	0.00307375	-0.00228054	0.99725	0.998566	no
ENSMUSG00000001334.9	ENSMUSG00000001334.9	Fndc5	chr4:129136998-129144593	WT_U	WT_D	OK	4.64354	2.39092	-0.957659	4.57327	5e-05	0.00046241	yes
ENSMUSG00000001348.14	ENSMUSG00000001348.14	Acp5	chr9:22126730-22135746	WT_U	WT_D	OK	0.101605	0.0543313	-0.903116	1.17599	0.06895	0.204974	no
ENSMUSG00000001349.4	ENSMUSG00000001349.4	Cnn1	chr9:22099280-22109630	WT_U	WT_D	OK	0.0802677	0.0246628	-1.70248	2.35539	0.0061	0.0302974	yes
ENSMUSG00000001366.14	ENSMUSG00000001366.14	Fbxo9	chr9:78081498-78109065	WT_U	WT_D	OK	13.06	12.5528	-0.0571457	0.254851	0.7017	0.889419	no
ENSMUSG00000001376.17	ENSMUSG00000001376.17	Ccdc132	chr6:3498381-3603531	WT_U	WT_D	OK	24.5342	25.4905	0.0551654	-0.288895	0.6563	0.863407	no
ENSMUSG00000001380.6	ENSMUSG00000001380.6	Hars	chr18:36766529-36792562	WT_U	WT_D	OK	69.3792	65.4181	-0.0848133	0.44083	0.5271	0.778444	no
ENSMUSG00000001383.8	ENSMUSG00000001383.8	Zmat2	chr18:36793922-36799660	WT_U	WT_D	OK	55.9839	51.9992	-0.106523	0.623073	0.3718	0.640407	no
ENSMUSG00000001403.13	ENSMUSG00000001403.13	Ube2c	chr2:164769897-164779967	WT_U	WT_D	OK	193.619	185.204	-0.0641053	0.37494	0.58455	0.819319	no
ENSMUSG00000001415.10	ENSMUSG00000001415.10	Smg5	chr3:88336259-88362338	WT_U	WT_D	OK	51.017	47.6719	-0.0978389	0.391765	0.53805	0.786776	no
ENSMUSG00000001416.13	ENSMUSG00000001416.13	Cct3	chr3:88297115-88321767	WT_U	WT_D	OK	313.302	299.943	-0.0628656	0.362863	0.60395	0.831974	no
ENSMUSG00000001418.13	ENSMUSG00000001418.13	Glmp	chr3:88325022-88336148	WT_U	WT_D	OK	14.9802	16.0642	0.100792	-0.357365	0.60805	0.834741	no
ENSMUSG00000001419.17	ENSMUSG00000001419.17	Mef2d	chr3:88142371-88177785	WT_U	WT_D	OK	51.9719	43.3618	-0.261307	1.0153	0.13225	0.32829	no
ENSMUSG00000001420.13	ENSMUSG00000001420.13	Tmem79	chr3:88325022-88336148	WT_U	WT_D	OK	1.47683	1.29393	-0.190744	0.252705	0.7204	0.898885	no
ENSMUSG00000001424.14	ENSMUSG00000001424.14	Snd1	chr6:28475138-28935162	WT_U	WT_D	OK	326.553	374.321	0.196959	-0.556785	0.4256	0.69319	no
ENSMUSG00000001435.14	ENSMUSG00000001435.14	Col18a1	chr10:77032240-77166548	WT_U	WT_D	OK	6.91773	6.59965	-0.0679092	0.133998	0.8281	0.942986	no
ENSMUSG00000001436.15	ENSMUSG00000001436.15	Slc19a1	chr10:77032240-77166548	WT_U	WT_D	OK	41.8884	38.6399	-0.116459	0.455624	0.5113	0.766281	no
ENSMUSG00000001440.5	ENSMUSG00000001440.5	Kpnb1	chr11:97159713-97187881	WT_U	WT_D	OK	353.967	321.793	-0.137482	0.381735	0.58945	0.82239	no
ENSMUSG00000001441.13	ENSMUSG00000001441.13	Npepps	chr11:97205841-97282897	WT_U	WT_D	OK	46.5239	40.0093	-0.217637	0.969462	0.08375	0.236762	no
ENSMUSG00000001444.2	ENSMUSG00000001444.2	Tbx21	chr11:97098070-97115331	WT_U	WT_D	OK	0.268378	0.304161	0.180569	-0.5535	0.4419	0.707502	no
ENSMUSG00000001445.10	ENSMUSG00000001445.10	Mrpl10	chr11:97041559-97068904	WT_U	WT_D	OK	63.8243	63.4591	-0.00827875	0.0451299	0.9463	0.980056	no
ENSMUSG00000001467.5	ENSMUSG00000001467.5	Cyp51	chr5:3928053-4104746	WT_U	WT_D	OK	61.444	66.6165	0.116607	-0.486629	0.4417	0.707374	no
ENSMUSG00000001473.6	ENSMUSG00000001473.6	Tubb6	chr18:67390716-67402748	WT_U	WT_D	OK	95.6769	85.7722	-0.157661	0.923113	0.18835	0.417784	no
ENSMUSG00000001506.10	ENSMUSG00000001506.10	Col1a1	chr11:94936223-94953042	WT_U	WT_D	OK	0.170496	0.077378	-1.13974	1.08185	0.0551	0.173439	no
ENSMUSG00000001507.16	ENSMUSG00000001507.16	Itga3	chr11:95044473-95076801	WT_U	WT_D	OK	2.62183	3.55666	0.439949	-1.15683	0.08745	0.244062	no
ENSMUSG00000001508.15	ENSMUSG00000001508.15	Sgca	chr11:94962790-94976327	WT_U	WT_D	OK	0.0864295	0.026116	-1.72659	0.884261	0.3205	0.583938	no
ENSMUSG00000001517.14	ENSMUSG00000001517.14	Foxm1	chr6:128362966-128424931	WT_U	WT_D	OK	40.1122	37.3222	-0.104007	0.365136	0.5635	0.805925	no
ENSMUSG00000001518.12	ENSMUSG00000001518.12	Itfg2	chr6:128362966-128424931	WT_U	WT_D	OK	17.5456	20.9769	0.257692	-0.421006	0.4252	0.69282	no
ENSMUSG00000001520.12	ENSMUSG00000001520.12	Nrip2	chr6:128362966-128424931	WT_U	WT_D	OK	1.0025	4.01111	2.0004	-1.4046	0.02355	0.0901261	no
ENSMUSG00000001521.12	ENSMUSG00000001521.12	Tulp3	chr6:128321160-128355851	WT_U	WT_D	OK	18.8635	18.6071	-0.0197442	0.109533	0.86765	0.955909	no
ENSMUSG00000001524.14	ENSMUSG00000001524.14	Gtf2h4	chr17:35667729-35673739	WT_U	WT_D	OK	16.6867	16.7514	0.005583	-0.025256	0.97085	0.987908	no
ENSMUSG00000001525.10	ENSMUSG00000001525.10	Tubb5	chr17:35833920-35838306	WT_U	WT_D	OK	662.41	698.71	0.0769693	-0.376912	0.5782	0.815128	no
ENSMUSG00000001542.6	ENSMUSG00000001542.6	Ell2	chr13:75707483-75772356	WT_U	WT_D	OK	0.0998639	0.08902	-0.165834	0.401434	0.5616	0.804436	no
ENSMUSG00000001552.14	ENSMUSG00000001552.14	Jup	chr11:100368957-100397763	WT_U	WT_D	OK	25.3887	16.809	-0.594953	2.27955	0.00075	0.0051382	yes
ENSMUSG00000001555.10	ENSMUSG00000001555.10	Fkbp10	chr11:100415696-100441808	WT_U	WT_D	OK	3.56799	1.95783	-0.865856	1.39118	0.03265	0.116262	no
ENSMUSG00000001558.5	ENSMUSG00000001558.5	Klhl10	chr11:100441916-100457022	WT_U	WT_D	OK	0.549516	0.589186	0.100562	-0.314484	0.64915	0.859202	no
ENSMUSG00000001569.10	ENSMUSG00000001569.10	Nom1	chr5:29434663-29457843	WT_U	WT_D	OK	14.2489	14.3013	0.00529575	-0.0112483	0.98725	0.993796	no
ENSMUSG00000001576.14	ENSMUSG00000001576.14	Ergic1	chr17:26554253-26656931	WT_U	WT_D	OK	54.8096	57.7064	0.0743027	-0.363512	0.5872	0.821057	no
ENSMUSG00000001588.12	ENSMUSG00000001588.12	Acap1	chr11:69881566-69895539	WT_U	WT_D	OK	0.700089	0.539263	-0.376549	1.21945	0.0835	0.236182	no
ENSMUSG00000001604.14	ENSMUSG00000001604.14	Tcea3	chr4:136247728-136274898	WT_U	WT_D	OK	1.62799	0.881577	-0.884933	2.89133	0.00015	0.00125317	yes
ENSMUSG00000001622.15	ENSMUSG00000001622.15	Csn3	chr5:87908578-88008534	WT_U	WT_D	OK	0	1.14601	#DIV/0!	-nan	5e-05	0.00046241	yes
ENSMUSG00000001627.11	ENSMUSG00000001627.11	Ifrd1	chr12:40201566-40248504	WT_U	WT_D	OK	195.961	193.669	-0.0169735	0.0642071	0.92745	0.974249	no
ENSMUSG00000001630.13	ENSMUSG00000001630.13	Stk38l	chr6:146724994-146778812	WT_U	WT_D	OK	6.82614	6.77098	-0.0117053	0.0486172	0.9385	0.977689	no
ENSMUSG00000001632.16	ENSMUSG00000001632.16	Brpf1	chr6:113307136-113326747	WT_U	WT_D	OK	16.3785	15.8325	-0.0489142	0.220379	0.71345	0.895365	no
ENSMUSG00000001642.18	ENSMUSG00000001642.18	Akr1b3	chr6:34290264-34324249	WT_U	WT_D	OK	107.062	80.0163	-0.420081	2.4274	0.0006	0.00423598	yes
ENSMUSG00000001657.7	ENSMUSG00000001657.7	Hoxc8	chr15:102966795-103017429	WT_U	WT_D	OK	0.885196	0.890589	0.00876286	-0.00750197	0.99115	0.995602	no
ENSMUSG00000001661.5	ENSMUSG00000001661.5	Hoxc6	chr15:102966795-103017429	WT_U	WT_D	OK	12.4652	11.6301	-0.100043	0.188912	0.78845	0.928316	no
ENSMUSG00000001663.10	ENSMUSG00000001663.10	Gstt1	chr10:75783812-75798584	WT_U	WT_D	OK	0.638712	0.307914	-1.05264	2.46071	0.0006	0.00423598	yes
ENSMUSG00000001666.8	ENSMUSG00000001666.8	Ddt	chr10:75771229-75781414	WT_U	WT_D	OK	45.628	49.9765	0.13133	-0.658387	0.3403	0.606578	no
ENSMUSG00000001674.11	ENSMUSG00000001674.11	Ddx18	chr1:121553834-121567989	WT_U	WT_D	OK	66.2599	63.4296	-0.0629798	0.257491	0.70325	0.890427	no
ENSMUSG00000001687.15	ENSMUSG00000001687.15	Ubl3	chr5:148504634-148552789	WT_U	WT_D	OK	28.0803	32.2392	0.199258	-0.812314	0.24005	0.487728	no
ENSMUSG00000001700.9	ENSMUSG00000001700.9	Gramd3	chr18:56432131-56503792	WT_U	WT_D	OK	3.85388	3.10002	-0.314034	1.49928	0.0321	0.114784	no
ENSMUSG00000001707.7	ENSMUSG00000001707.7	Eef1e1	chr13:38645697-38659028	WT_U	WT_D	OK	59.0932	56.7392	-0.0586463	0.300338	0.6654	0.869273	no
ENSMUSG00000001729.14	ENSMUSG00000001729.14	Akt1	chr12:112653820-112674884	WT_U	WT_D	OK	56.7996	54.1166	-0.0698096	0.336716	0.6106	0.836214	no
ENSMUSG00000001739.14	ENSMUSG00000001739.14	Cldn15	chr5:136966615-136975858	WT_U	WT_D	OK	0.708189	0.491786	-0.526104	1.53352	0.029	0.105999	no
ENSMUSG00000001750.15	ENSMUSG00000001750.15	Tcirg1	chr19:3896049-3907133	WT_U	WT_D	OK	6.98512	4.58489	-0.607398	1.83983	0.01085	0.0486036	yes
ENSMUSG00000001751.9	ENSMUSG00000001751.9	Naglu	chr11:101070011-101077672	WT_U	WT_D	OK	12.8944	12.5542	-0.0385745	0.193891	0.77715	0.923717	no
ENSMUSG00000001755.12	ENSMUSG00000001755.12	Coasy	chr11:101082564-101086619	WT_U	WT_D	OK	31.483	37.7007	0.260018	-1.12476	0.10645	0.281619	no
ENSMUSG00000001761.7	ENSMUSG00000001761.7	Smo	chr6:29735502-29761365	WT_U	WT_D	OK	0.0947465	0.0692001	-0.453299	1.02972	0.1364	0.335467	no
ENSMUSG00000001763.14	ENSMUSG00000001763.14	Tspan33	chr6:29694221-29718559	WT_U	WT_D	OK	1.88971	2.02109	0.0969687	-0.422176	0.5481	0.79455	no
ENSMUSG00000001767.5	ENSMUSG00000001767.5	Crnkl1	chr2:145917478-146215039	WT_U	WT_D	OK	12.5041	12.4066	-0.0112934	0.0483928	0.93565	0.976831	no
ENSMUSG00000001774.7	ENSMUSG00000001774.7	Chordc1	chr9:18292266-18314000	WT_U	WT_D	OK	53.664	63.6541	0.246299	-1.44099	0.03895	0.133167	no
ENSMUSG00000001783.3	ENSMUSG00000001783.3	Rtcb	chr10:85927680-85957823	WT_U	WT_D	OK	92.5604	96.2852	0.056919	-0.331195	0.63685	0.851742	no
ENSMUSG00000001785.11	ENSMUSG00000001785.11	Pwp1	chr10:85871830-85889096	WT_U	WT_D	OK	42.083	40.1249	-0.0687398	0.37696	0.59425	0.825718	no
ENSMUSG00000001786.14	ENSMUSG00000001786.14	Fbxo7	chr10:86020440-86051873	WT_U	WT_D	OK	8.12284	8.26798	0.0255507	-0.0972132	0.8827	0.960534	no
ENSMUSG00000001794.12	ENSMUSG00000001794.12	Capns1	chr7:30186941-30195164	WT_U	WT_D	OK	106.36	114.598	0.107626	-0.575121	0.4032	0.672123	no
ENSMUSG00000001827.11	ENSMUSG00000001827.11	Folr1	chr7:101858330-101870788	WT_U	WT_D	OK	11.1923	12.7667	0.189879	-0.775254	0.2672	0.521254	no
ENSMUSG00000001829.16	ENSMUSG00000001829.16	Clpb	chr7:101663632-101790168	WT_U	WT_D	OK	44.2003	48.8969	0.145687	-0.602818	0.38245	0.651483	no
ENSMUSG00000001833.16	ENSMUSG00000001833.16	Sept7	chr9:25252438-25308571	WT_U	WT_D	OK	99.599	86.9102	-0.196606	1.15102	0.09865	0.266522	no
ENSMUSG00000001844.10	ENSMUSG00000001844.10	Zdhhc4	chr5:143316488-143332704	WT_U	WT_D	OK	20.6133	22.5823	0.131617	-0.590383	0.39415	0.663205	no
ENSMUSG00000001847.14	ENSMUSG00000001847.14	Rac1	chr5:143464583-143528036	WT_U	WT_D	OK	297.532	242.52	-0.294941	1.20342	0.08235	0.233701	no
ENSMUSG00000001855.15	ENSMUSG00000001855.15	Nup214	chr2:31974435-32084857	WT_U	WT_D	OK	18.7774	18.3871	-0.0303034	0.120608	0.83155	0.944082	no
ENSMUSG00000001864.13	ENSMUSG00000001864.13	Aif1l	chr2:31950138-31973442	WT_U	WT_D	OK	4.13384	4.29172	0.0540734	-0.14922	0.7951	0.930677	no
ENSMUSG00000001891.16	ENSMUSG00000001891.16	Ugp2	chr11:21321137-21374161	WT_U	WT_D	OK	43.8743	41.3236	-0.0864102	0.480412	0.48025	0.740287	no
ENSMUSG00000001901.15	ENSMUSG00000001901.15	Kcnh6	chr11:106008123-106034549	WT_U	WT_D	OK	0.766494	0.444439	-0.786289	2.58635	0.00035	0.00265006	yes
ENSMUSG00000001909.15	ENSMUSG00000001909.15	Trmt1	chr8:84670482-84699808	WT_U	WT_D	OK	51.8283	57.3113	0.14508	-0.322759	0.62465	0.844421	no
ENSMUSG00000001910.4	ENSMUSG00000001910.4	Nacc1	chr8:84670482-84699808	WT_U	WT_D	OK	33.4797	35.3529	0.078542	-0.377997	0.5891	0.822222	no
ENSMUSG00000001911.16	ENSMUSG00000001911.16	Nfix	chr8:84699875-84800344	WT_U	WT_D	OK	7.06672	4.39035	-0.686705	2.31094	0.0001	0.000870202	yes
ENSMUSG00000001918.17	ENSMUSG00000001918.17	Slc1a5	chr7:16781339-16798274	WT_U	WT_D	OK	88.6832	108.241	0.287514	-1.43351	0.03085	0.1113	no
ENSMUSG00000001924.15	ENSMUSG00000001924.15	Uba1	chrX:20658325-20683179	WT_U	WT_D	OK	127.256	129.274	0.0226985	-0.105148	0.8784	0.95941	no
ENSMUSG00000001930.17	ENSMUSG00000001930.17	Vwf	chr6:125546773-125686679	WT_U	WT_D	OK	2.42639	2.62898	0.115692	-0.417022	0.52485	0.776701	no
ENSMUSG00000001942.7	ENSMUSG00000001942.7	Siae	chr9:37613846-37648318	WT_U	WT_D	OK	1.70219	1.38385	-0.298705	1.36439	0.05225	0.166758	no
ENSMUSG00000001946.13	ENSMUSG00000001946.13	Esam	chr9:37528077-37538319	WT_U	WT_D	OK	0.641723	1.31447	1.03446	-2.33142	0.0015	0.00931642	yes
ENSMUSG00000001948.9	ENSMUSG00000001948.9	Spa17	chr9:37603294-37613720	WT_U	WT_D	OK	11.0272	10.3635	-0.0895552	0.410164	0.56135	0.804205	no
ENSMUSG00000001962.8	ENSMUSG00000001962.8	Fam50a	chrX:74313032-74320149	WT_U	WT_D	OK	59.5561	62.0709	0.0596678	-0.343287	0.61905	0.841118	no
ENSMUSG00000001964.14	ENSMUSG00000001964.14	Emd	chrX:74254686-74261548	WT_U	WT_D	OK	68.9344	75.4515	0.130325	-0.683082	0.33705	0.603081	no
ENSMUSG00000001983.7	ENSMUSG00000001983.7	Taco1	chr11:106065076-106073612	WT_U	WT_D	OK	22.6002	22.0203	-0.0375014	0.188921	0.7898	0.928803	no
ENSMUSG00000001988.8	ENSMUSG00000001988.8	Npas1	chr7:16455720-16476780	WT_U	WT_D	OK	2.19842	2.2457	0.0306982	-0.137543	0.844	0.948331	no
ENSMUSG00000001995.8	ENSMUSG00000001995.8	Sipa1l2	chr8:125418062-125492710	WT_U	WT_D	OK	23.8349	21.2319	-0.166842	0.976825	0.1653	0.38265	no
ENSMUSG00000001998.15	ENSMUSG00000001998.15	Ap4e1	chr2:127008716-127067909	WT_U	WT_D	OK	9.83831	9.51863	-0.0476566	0.22	0.7424	0.908683	no
ENSMUSG00000001999.15	ENSMUSG00000001999.15	Blvra	chr2:127070664-127097084	WT_U	WT_D	OK	12.4304	9.62378	-0.369197	1.77983	0.0097	0.0443624	yes
ENSMUSG00000002006.12	ENSMUSG00000002006.12	Pdzd4	chrX:73793358-73824969	WT_U	WT_D	OK	9.67194	9.30238	-0.0562054	0.286154	0.68765	0.881322	no
ENSMUSG00000002010.17	ENSMUSG00000002010.17	Idh3g	chrX:73778962-73786897	WT_U	WT_D	OK	101.473	107.426	0.0822473	-0.400612	0.55995	0.803279	no
ENSMUSG00000002012.13	ENSMUSG00000002012.13	Pnck	chrX:73655993-73660117	WT_U	WT_D	OK	0.298702	0.257587	-0.213647	0.399571	0.56135	0.804205	no
ENSMUSG00000002014.12	ENSMUSG00000002014.12	Ssr4	chrX:73787027-73790830	WT_U	WT_D	OK	73.1343	77.4246	0.0822438	-0.384834	0.58	0.816493	no
ENSMUSG00000002015.5	ENSMUSG00000002015.5	Bcap31	chrX:73686177-73716175	WT_U	WT_D	OK	59.9914	59.6462	-0.00832547	0.0484102	0.9435	0.97913	no
ENSMUSG00000002017.9	ENSMUSG00000002017.9	Fam98a	chr17:75537085-75551946	WT_U	WT_D	OK	35.3948	34.7843	-0.0251011	0.136401	0.8365	0.945823	no
ENSMUSG00000002020.15	ENSMUSG00000002020.15	Ltbp2	chr12:84783211-84878132	WT_U	WT_D	OK	0.12874	0.179898	0.482719	-0.542363	0.40075	0.66971	no
ENSMUSG00000002028.12	ENSMUSG00000002028.12	Kmt2a	chr9:44803354-44881296	WT_U	WT_D	OK	17.392	16.8396	-0.046566	0.176804	0.7942	0.930363	no
ENSMUSG00000002031.11	ENSMUSG00000002031.11	Ift46	chr9:44767907-44792714	WT_U	WT_D	OK	51.9243	52.4608	0.0148299	-0.0582575	0.9322	0.975689	no
ENSMUSG00000002032.16	ENSMUSG00000002032.16	Tmem25	chr9:44793775-44799307	WT_U	WT_D	OK	0.666184	0.683022	0.0360113	-0.141032	0.84575	0.948978	no
ENSMUSG00000002043.16	ENSMUSG00000002043.16	Trappc6a	chr7:19508669-19516145	WT_U	WT_D	OK	11.1826	17.2171	0.622587	-2.94485	5e-05	0.00046241	yes
ENSMUSG00000002052.6	ENSMUSG00000002052.6	Supt6	chr11:78206745-78255496	WT_U	WT_D	OK	36.6879	35.1429	-0.0620711	0.34885	0.6117	0.836862	no
ENSMUSG00000002055.9	ENSMUSG00000002055.9	Spag5	chr11:78301528-78322457	WT_U	WT_D	OK	26.5775	30.0291	0.176156	-0.610416	0.33365	0.599406	no
ENSMUSG00000002058.13	ENSMUSG00000002058.13	Unc119	chr11:78343481-78349164	WT_U	WT_D	OK	14.2895	12.1461	-0.234462	1.1487	0.1011	0.271211	no
ENSMUSG00000002059.17	ENSMUSG00000002059.17	Rab34	chr11:78188429-78192193	WT_U	WT_D	OK	24.9742	26.4443	0.0825183	-0.391817	0.56095	0.803953	no
ENSMUSG00000002064.10	ENSMUSG00000002064.10	Sdf2	chr11:78206745-78255496	WT_U	WT_D	OK	17.9368	18.8811	0.0740203	-0.114982	0.8599	0.953681	no
ENSMUSG00000002068.16	ENSMUSG00000002068.16	Ccne1	chr7:38097983-38107534	WT_U	WT_D	OK	34.6104	29.6397	-0.223675	0.870927	0.2116	0.451024	no
ENSMUSG00000002076.11	ENSMUSG00000002076.11	Hsf2bp	chr17:31944768-32034508	WT_U	WT_D	OK	0.269606	0.340576	0.337124	-0.456555	0.5204	0.773521	no
ENSMUSG00000002083.12	ENSMUSG00000002083.12	Bbc3	chr7:16309615-16318205	WT_U	WT_D	OK	6.7263	8.97609	0.416274	-1.51819	0.02775	0.102545	no
ENSMUSG00000002102.15	ENSMUSG00000002102.15	Psmc3	chr2:91054008-91070417	WT_U	WT_D	OK	136.806	143.754	0.0714706	-0.383249	0.5696	0.810128	no
ENSMUSG00000002103.15	ENSMUSG00000002103.15	Acp2	chr2:91202884-91236982	WT_U	WT_D	OK	4.60163	6.31966	0.457702	-1.45908	0.024	0.091471	no
ENSMUSG00000002104.11	ENSMUSG00000002104.11	Rapsn	chr2:91035619-91053933	WT_U	WT_D	OK	0.685578	0.767769	0.163351	-0.521809	0.45205	0.716732	no
ENSMUSG00000002105.15	ENSMUSG00000002105.15	Slc39a13	chr2:91054008-91070417	WT_U	WT_D	OK	5.62161	4.94661	-0.184543	0.192281	0.73625	0.906303	no
ENSMUSG00000002108.10	ENSMUSG00000002108.10	Nr1h3	chr2:91184060-91202834	WT_U	WT_D	OK	1.17982	0.95574	-0.303877	1.06914	0.1119	0.292172	no
ENSMUSG00000002109.14	ENSMUSG00000002109.14	Ddb2	chr2:91202884-91236982	WT_U	WT_D	OK	2.34426	2.74886	0.229701	-0.488621	0.4883	0.747463	no
ENSMUSG00000002129.11	ENSMUSG00000002129.11	Sf3a1	chr11:4160349-4182541	WT_U	WT_D	OK	44.0282	43.2291	-0.0264251	0.119338	0.8389	0.946677	no
ENSMUSG00000002147.18	ENSMUSG00000002147.18	Stat6	chr10:127642985-127701049	WT_U	WT_D	OK	14.9697	11.0885	-0.432981	1.26102	0.037	0.128069	no
ENSMUSG00000002205.15	ENSMUSG00000002205.15	Vrk3	chr7:44731480-44777515	WT_U	WT_D	OK	15.6393	15.7551	0.010643	-0.0422926	0.9505	0.981332	no
ENSMUSG00000002210.11	ENSMUSG00000002210.11	Smg9	chr7:24399618-24422778	WT_U	WT_D	OK	23.3351	22.6095	-0.0455726	0.200665	0.76835	0.91998	no
ENSMUSG00000002221.11	ENSMUSG00000002221.11	Paxip1	chr5:27740079-27791691	WT_U	WT_D	OK	27.6717	25.9259	-0.0940172	0.258748	0.70255	0.890001	no
ENSMUSG00000002222.14	ENSMUSG00000002222.14	Rmnd5a	chr6:71388633-71440637	WT_U	WT_D	OK	25.238	30.6185	0.278806	-1.43842	0.0273	0.101226	no
ENSMUSG00000002227.15	ENSMUSG00000002227.15	Mov10	chr3:104794835-104818563	WT_U	WT_D	OK	11.619	12.9227	0.153422	-0.602024	0.3851	0.654118	no
ENSMUSG00000002228.7	ENSMUSG00000002228.7	Ppm1j	chr3:104752726-104786018	WT_U	WT_D	OK	0.391898	0.780605	0.994114	-1.84312	0.0076	0.0363372	yes
ENSMUSG00000002233.13	ENSMUSG00000002233.13	Rhoc	chr3:104788374-104794459	WT_U	WT_D	OK	85.1547	159.629	0.906565	-4.89825	5e-05	0.00046241	yes
ENSMUSG00000002249.17	ENSMUSG00000002249.17	Tead3	chr17:28331670-28350805	WT_U	WT_D	OK	3.00794	1.11951	-1.42591	3.61256	5e-05	0.00046241	yes
ENSMUSG00000002250.15	ENSMUSG00000002250.15	Ppard	chr17:28232753-28301469	WT_U	WT_D	OK	11.1881	10.451	-0.0983241	0.377075	0.5914	0.823723	no
ENSMUSG00000002257.7	ENSMUSG00000002257.7	Def6	chr17:28207777-28228608	WT_U	WT_D	OK	3.4756	3.18806	-0.124583	0.58521	0.39675	0.665891	no
ENSMUSG00000002265.15	ENSMUSG00000002265.15	Peg3	chr7:6703891-6730421	WT_U	WT_D	OK	51.3225	43.575	-0.236091	1.16143	0.0603	0.185586	no
ENSMUSG00000002266.15	ENSMUSG00000002266.15	Zim1	chr7:6671455-6696450	WT_U	WT_D	OK	0.201702	0.159536	-0.338343	0.705586	0.3177	0.580748	no
ENSMUSG00000002274.12	ENSMUSG00000002274.12	Metrn	chr17:25794570-25985680	WT_U	WT_D	OK	24.4544	56.3219	1.2036	-2.06208	0.00575	0.028858	yes
ENSMUSG00000002279.18	ENSMUSG00000002279.18	Lmf1	chr17:25579173-25662826	WT_U	WT_D	OK	21.2967	21.3751	0.00530127	-0.025501	0.9703	0.987639	no
ENSMUSG00000002280.10	ENSMUSG00000002280.10	Narfl	chr17:25773775-25785673	WT_U	WT_D	OK	8.42876	9.10977	0.112094	-0.309188	0.5604	0.803579	no
ENSMUSG00000002289.15	ENSMUSG00000002289.15	Angptl4	chr17:33773749-33781575	WT_U	WT_D	OK	0.0991802	0.289772	1.54679	-2.39038	0.0002	0.00162246	yes
ENSMUSG00000002297.15	ENSMUSG00000002297.15	Dbf4	chr5:8396972-8422716	WT_U	WT_D	OK	57.1754	58.7388	0.0389192	-0.211186	0.7552	0.914341	no
ENSMUSG00000002307.15	ENSMUSG00000002307.15	Daxx	chr17:33909413-33915589	WT_U	WT_D	OK	14.1946	13.6494	-0.0565047	0.254281	0.6955	0.885887	no
ENSMUSG00000002308.15	ENSMUSG00000002308.15	Cd320	chr17:33843090-33849774	WT_U	WT_D	OK	18.4236	15.9015	-0.212392	0.796167	0.2564	0.507768	no
ENSMUSG00000002319.15	ENSMUSG00000002319.15	Ipo4	chr14:55625399-55643806	WT_U	WT_D	OK	30.2678	30.819	0.0260362	-0.0759489	0.89735	0.964896	no
ENSMUSG00000002320.15	ENSMUSG00000002320.15	Tm9sf1	chr14:55625399-55643806	WT_U	WT_D	OK	30.5715	30.9573	0.0180923	-0.0462612	0.9397	0.978073	no
ENSMUSG00000002324.7	ENSMUSG00000002324.7	Rec8	chr14:55618036-55625395	WT_U	WT_D	OK	4.86691	23.3652	2.26328	-9.1783	5e-05	0.00046241	yes
ENSMUSG00000002325.14	ENSMUSG00000002325.14	Irf9	chr14:55591707-55610030	WT_U	WT_D	OK	4.37087	4.08378	-0.0980153	0.224633	0.73285	0.904753	no
ENSMUSG00000002326.5	ENSMUSG00000002326.5	Gmpr2	chr14:55672234-55678750	WT_U	WT_D	OK	12.8317	12.502	-0.0375534	0.187015	0.78965	0.92874	no
ENSMUSG00000002329.6	ENSMUSG00000002329.6	Mdp1	chr14:55657878-55660508	WT_U	WT_D	OK	20.8026	22.6967	0.125719	-0.639385	0.35765	0.625246	no
ENSMUSG00000002332.15	ENSMUSG00000002332.15	Dhrs1	chr14:55739019-55745690	WT_U	WT_D	OK	16.1097	14.9962	-0.103333	0.502525	0.4577	0.721841	no
ENSMUSG00000002341.8	ENSMUSG00000002341.8	Ncan	chr8:70093084-70120873	WT_U	WT_D	OK	2.76891	2.7663	-0.00136054	0.00681894	0.9922	0.995917	no
ENSMUSG00000002342.17	ENSMUSG00000002342.17	Tmem161a	chr8:70172355-70183681	WT_U	WT_D	OK	23.8539	26.3465	0.143386	-0.46237	0.47305	0.734295	no
ENSMUSG00000002343.11	ENSMUSG00000002343.11	Armc6	chr8:70220171-70279915	WT_U	WT_D	OK	16.3151	17.5677	0.106717	-0.285377	0.66825	0.870759	no
ENSMUSG00000002345.17	ENSMUSG00000002345.17	Borcs8	chr8:70139498-70167488	WT_U	WT_D	OK	11.3015	15.3907	0.445545	-1.38568	0.0522	0.166646	no
ENSMUSG00000002346.16	ENSMUSG00000002346.16	Slc25a42	chr8:70184339-70212305	WT_U	WT_D	OK	1.05002	1.07855	0.0386763	-0.151162	0.8329	0.944438	no
ENSMUSG00000002365.9	ENSMUSG00000002365.9	Snx9	chr17:5841327-5931033	WT_U	WT_D	OK	16.932	20.3506	0.265319	-1.35517	0.0535	0.169704	no
ENSMUSG00000002372.8	ENSMUSG00000002372.8	Ranbp3	chr17:56673224-56711769	WT_U	WT_D	OK	29.8417	28.8531	-0.0486034	0.282898	0.6872	0.881027	no
ENSMUSG00000002379.6	ENSMUSG00000002379.6	Ndufa11	chr17:56717761-56724248	WT_U	WT_D	OK	11.8693	11.4028	-0.0578467	0.293124	0.68185	0.877965	no
ENSMUSG00000002393.14	ENSMUSG00000002393.14	Nr2f6	chr8:71371297-71381960	WT_U	WT_D	OK	18.3727	15.6005	-0.235971	0.699243	0.29325	0.552536	no
ENSMUSG00000002395.14	ENSMUSG00000002395.14	Use1	chr8:71366847-71369732	WT_U	WT_D	OK	49.8077	63.1359	0.342092	-1.70649	0.0149	0.0627113	no
ENSMUSG00000002396.8	ENSMUSG00000002396.8	Ocel1	chr8:71371297-71381960	WT_U	WT_D	OK	1.30988	1.45109	0.147702	-0.146759	0.7826	0.926036	no
ENSMUSG00000002409.17	ENSMUSG00000002409.17	Dyrk1b	chr7:28179468-28187294	WT_U	WT_D	OK	2.57112	3.85607	0.584734	-2.7194	0.0001	0.000870202	yes
ENSMUSG00000002413.15	ENSMUSG00000002413.15	Braf	chr6:39573872-39725463	WT_U	WT_D	OK	15.8932	14.6815	-0.11441	0.443579	0.5255	0.777193	no
ENSMUSG00000002416.13	ENSMUSG00000002416.13	Ndufb2	chr6:39573872-39725463	WT_U	WT_D	OK	72.0705	70.253	-0.036849	0.0777415	0.91465	0.969966	no
ENSMUSG00000002428.12	ENSMUSG00000002428.12	Hltf	chr3:20057810-20118490	WT_U	WT_D	OK	12.1949	11.2495	-0.116417	0.590629	0.4001	0.669171	no
ENSMUSG00000002455.14	ENSMUSG00000002455.14	Prpf6	chr2:181569148-181655660	WT_U	WT_D	OK	34.9713	33.8864	-0.045465	0.180174	0.79185	0.929664	no
ENSMUSG00000002458.13	ENSMUSG00000002458.13	Rgs19	chr2:181688418-181693977	WT_U	WT_D	OK	33.7837	31.7408	-0.0899889	0.328353	0.6348	0.850557	no
ENSMUSG00000002459.17	ENSMUSG00000002459.17	Rgs20	chr1:4909575-5162529	WT_U	WT_D	OK	1.92392	2.0505	0.0919269	-0.0896938	0.8923	0.963364	no
ENSMUSG00000002475.15	ENSMUSG00000002475.15	Abhd3	chr18:10644410-10706771	WT_U	WT_D	OK	0.393308	0.555422	0.497925	-1.55119	0.02805	0.103417	no
ENSMUSG00000002477.4	ENSMUSG00000002477.4	Snrpd1	chr18:10617795-10628230	WT_U	WT_D	OK	215.145	183.3	-0.231103	1.35154	0.0534	0.169483	no
ENSMUSG00000002486.15	ENSMUSG00000002486.15	Tchp	chr5:114707759-114722327	WT_U	WT_D	OK	9.95482	11.3873	0.193959	-0.654066	0.33395	0.59974	no
ENSMUSG00000002489.15	ENSMUSG00000002489.15	Tiam1	chr16:89787110-89980080	WT_U	WT_D	OK	12.8091	12.2175	-0.06822	0.194016	0.6613	0.86681	no
ENSMUSG00000002496.9	ENSMUSG00000002496.9	Tsc2	chr17:24549949-24632629	WT_U	WT_D	OK	10.7372	11.3966	0.0859857	-0.376086	0.5912	0.823559	no
ENSMUSG00000002500.15	ENSMUSG00000002500.15	Rpl3l	chr17:24727819-24736143	WT_U	WT_D	OK	0.0973549	0.15104	0.633605	-0.910872	0.15365	0.364309	no
ENSMUSG00000002504.14	ENSMUSG00000002504.14	Slc9a3r2	chr17:24639281-24650305	WT_U	WT_D	OK	2.73133	3.279	0.263652	-1.21985	0.0834	0.235939	no
ENSMUSG00000002524.15	ENSMUSG00000002524.15	Puf60	chr15:76070183-76080946	WT_U	WT_D	OK	101.949	96.1684	-0.0842128	0.493128	0.48325	0.7429	no
ENSMUSG00000002546.16	ENSMUSG00000002546.16	Golga2	chr2:32278815-32307921	WT_U	WT_D	OK	24.5973	25.3825	0.0453342	-0.0951309	0.85185	0.950924	no
ENSMUSG00000002550.16	ENSMUSG00000002550.16	Uck1	chr2:32236589-32260159	WT_U	WT_D	OK	28.6648	38.0253	0.407679	-1.74383	0.01255	0.0545672	no
ENSMUSG00000002578.15	ENSMUSG00000002578.15	Ikzf4	chr10:128630842-128649811	WT_U	WT_D	OK	0.890848	0.852552	-0.0633915	0.145024	0.76405	0.917914	no
ENSMUSG00000002580.7	ENSMUSG00000002580.7	Mien1	chr11:98412469-98439046	WT_U	WT_D	OK	80.9431	73.8187	-0.132922	0.672771	0.3386	0.604731	no
ENSMUSG00000002602.16	ENSMUSG00000002602.16	Axl	chr7:25757272-25788705	WT_U	WT_D	OK	0.522676	0.21655	-1.27122	1.85832	0.00395	0.0211044	yes
ENSMUSG00000002603.15	ENSMUSG00000002603.15	Tgfb1	chr7:25687001-25705077	WT_U	WT_D	OK	5.10246	3.62372	-0.493721	2.26891	0.0009	0.00601451	yes
ENSMUSG00000002608.8	ENSMUSG00000002608.8	Ccdc97	chr7:25711105-25719088	WT_U	WT_D	OK	24.0876	22.796	-0.07951	0.260671	0.6729	0.87297	no
ENSMUSG00000002617.14	ENSMUSG00000002617.14	Zfp40	chr17:23173868-23193252	WT_U	WT_D	OK	2.83785	3.33173	0.231473	-0.83781	0.21235	0.452016	no
ENSMUSG00000002625.9	ENSMUSG00000002625.9	Akap8l	chr17:32321424-32350581	WT_U	WT_D	OK	26.3814	30.4765	0.208176	-1.13119	0.10225	0.273468	no
ENSMUSG00000002635.11	ENSMUSG00000002635.11	Pdcd2l	chr7:34184498-34196661	WT_U	WT_D	OK	22.616	22.1151	-0.032312	0.149484	0.81985	0.940059	no
ENSMUSG00000002658.9	ENSMUSG00000002658.9	Gtf2f1	chr17:57003404-57011288	WT_U	WT_D	OK	66.3489	69.1195	0.0590202	-0.345094	0.6235	0.843857	no
ENSMUSG00000002660.7	ENSMUSG00000002660.7	Clpp	chr17:56990263-56996371	WT_U	WT_D	OK	36.089	41.2357	0.192335	-0.981075	0.1607	0.375568	no
ENSMUSG00000002661.14	ENSMUSG00000002661.14	Alkbh7	chr17:56997338-56999322	WT_U	WT_D	OK	10.6415	15.294	0.523264	-2.44975	0.00055	0.00392894	yes
ENSMUSG00000002679.14	ENSMUSG00000002679.14	Med6	chr12:81573556-81595008	WT_U	WT_D	OK	32.4237	31.6497	-0.0348569	0.166746	0.81275	0.937288	no
ENSMUSG00000002718.14	ENSMUSG00000002718.14	Cse1l	chr2:166906039-166946389	WT_U	WT_D	OK	74.1388	66.1183	-0.165179	0.716975	0.2659	0.519557	no
ENSMUSG00000002728.14	ENSMUSG00000002728.14	Naa20	chr2:145902098-145916425	WT_U	WT_D	OK	68.1761	60.887	-0.163132	0.865674	0.19165	0.422746	no
ENSMUSG00000002731.6	ENSMUSG00000002731.6	Prkra	chr2:76629897-76648015	WT_U	WT_D	OK	20.5001	21.3865	0.0610695	-0.295651	0.66935	0.871366	no
ENSMUSG00000002732.14	ENSMUSG00000002732.14	Fkbp7	chr2:76663043-76673116	WT_U	WT_D	OK	7.2865	6.67812	-0.125784	0.549836	0.4328	0.699347	no
ENSMUSG00000002733.8	ENSMUSG00000002733.8	Plekha3	chr2:76675280-76696828	WT_U	WT_D	OK	24.2727	23.8749	-0.0238399	0.134143	0.84665	0.949318	no
ENSMUSG00000002741.9	ENSMUSG00000002741.9	Ykt6	chr11:5955692-5967780	WT_U	WT_D	OK	56.0526	52.7052	-0.088836	0.474631	0.4949	0.752839	no
ENSMUSG00000002748.7	ENSMUSG00000002748.7	Baz1b	chr5:135187263-135246129	WT_U	WT_D	OK	72.1435	71.7611	-0.00766741	0.0418531	0.9503	0.981288	no
ENSMUSG00000002763.16	ENSMUSG00000002763.16	Pex6	chr17:46442447-46831413	WT_U	WT_D	OK	8.71375	8.96807	0.0415038	-0.0432736	0.9468	0.980179	no
ENSMUSG00000002767.13	ENSMUSG00000002767.13	Mrpl2	chr17:46442447-46831413	WT_U	WT_D	OK	62.1201	60.1671	-0.0460853	0.0621909	0.9248	0.973415	no
ENSMUSG00000002768.7	ENSMUSG00000002768.7	Mea1	chr17:46442447-46831413	WT_U	WT_D	OK	59.7158	79.8932	0.41996	-0.57207	0.41075	0.679419	no
ENSMUSG00000002769.8	ENSMUSG00000002769.8	Gnmt	chr17:46442447-46831413	WT_U	WT_D	OK	0.197403	0.189452	-0.0593115	0.00453493	0.96215	0.984977	no
ENSMUSG00000002771.10	ENSMUSG00000002771.10	Grin2d	chr7:45831882-45870928	WT_U	WT_D	OK	0.506745	0.785742	0.632796	-2.6173	5e-05	0.00046241	yes
ENSMUSG00000002778.12	ENSMUSG00000002778.12	Kdelr1	chr7:45872771-45883731	WT_U	WT_D	OK	46.3082	48.8502	0.0770968	-0.442243	0.5256	0.777272	no
ENSMUSG00000002781.17	ENSMUSG00000002781.17	Tmem143	chr7:45896940-45917413	WT_U	WT_D	OK	12.1438	13.8682	0.191561	-0.781012	0.2632	0.516305	no
ENSMUSG00000002791.16	ENSMUSG00000002791.16	Pdxk-ps	chr17:32076082-32107350	WT_U	WT_D	OK	0.0986222	0.13595	0.463092	-0.824977	0.17405	0.39615	no
ENSMUSG00000002797.9	ENSMUSG00000002797.9	Ggct	chr6:54982579-54992950	WT_U	WT_D	OK	6.72628	5.02669	-0.4202	1.07954	0.1187	0.30482	no
ENSMUSG00000002799.5	ENSMUSG00000002799.5	Jag2	chr12:112908589-112929495	WT_U	WT_D	OK	12.1367	10.0237	-0.275961	1.41066	0.0443	0.147097	no
ENSMUSG00000002804.3	ENSMUSG00000002804.3	Nudt14	chr12:112934732-112942118	WT_U	WT_D	OK	9.68794	8.32069	-0.219487	1.00906	0.152	0.361655	no
ENSMUSG00000002808.6	ENSMUSG00000002808.6	Epdr1	chr13:19591708-19619830	WT_U	WT_D	OK	14.2826	16.3412	0.194255	-0.988179	0.1539	0.364755	no
ENSMUSG00000002812.4	ENSMUSG00000002812.4	Flii	chr11:60699722-60727263	WT_U	WT_D	OK	40.3085	34.3233	-0.231896	1.00419	0.1111	0.290583	no
ENSMUSG00000002814.15	ENSMUSG00000002814.15	Top3a	chr11:60740057-60777365	WT_U	WT_D	OK	12.1445	10.9708	-0.146634	0.666406	0.3069	0.56861	no
ENSMUSG00000002820.5	ENSMUSG00000002820.5	Atg4d	chr9:21265298-21287969	WT_U	WT_D	OK	6.42396	6.71396	0.063701	-0.179694	0.79905	0.932371	no
ENSMUSG00000002825.6	ENSMUSG00000002825.6	Qtrt1	chr9:21411836-21420277	WT_U	WT_D	OK	11.7093	13.737	0.230412	-1.1381	0.106	0.280695	no
ENSMUSG00000002833.10	ENSMUSG00000002833.10	Hdgfrp2	chr17:56079656-56109803	WT_U	WT_D	OK	57.3942	53.6387	-0.0976307	0.57108	0.40925	0.677821	no
ENSMUSG00000002835.8	ENSMUSG00000002835.8	Chaf1a	chr17:56040415-56075028	WT_U	WT_D	OK	36.8479	30.817	-0.257856	1.29892	0.0662	0.198894	no
ENSMUSG00000002844.8	ENSMUSG00000002844.8	Adprh	chr16:38445398-38453493	WT_U	WT_D	OK	57.8225	52.9648	-0.126597	0.737919	0.2875	0.545549	no
ENSMUSG00000002845.14	ENSMUSG00000002845.14	Tmem39a	chr16:38558697-38592162	WT_U	WT_D	OK	24.358	28.8359	0.24347	-0.8947	0.1933	0.42529	no
ENSMUSG00000002846.9	ENSMUSG00000002846.9	Timmdc1	chr16:38498346-38522663	WT_U	WT_D	OK	30.1976	28.7991	-0.0684102	0.339527	0.62525	0.844742	no
ENSMUSG00000002847.6	ENSMUSG00000002847.6	Pla1a	chr16:38396118-38433145	WT_U	WT_D	OK	0.0375921	0.0748675	0.99391	-1.41014	0.05685	0.177575	no
ENSMUSG00000002870.8	ENSMUSG00000002870.8	Mcm2	chr6:88883473-88898780	WT_U	WT_D	OK	79.9281	78.3813	-0.0281933	0.148704	0.81125	0.936734	no
ENSMUSG00000002871.14	ENSMUSG00000002871.14	Tpra1	chr6:88902250-88912238	WT_U	WT_D	OK	14.4033	14.8043	0.0396169	-0.0991465	0.88265	0.960521	no
ENSMUSG00000002881.14	ENSMUSG00000002881.14	Nab1	chr1:52457293-52500679	WT_U	WT_D	OK	30.3587	25.3968	-0.257463	1.331	0.03635	0.126387	no
ENSMUSG00000002885.14	ENSMUSG00000002885.14	Adgre5	chr8:83715176-83741326	WT_U	WT_D	OK	1.36018	0.981266	-0.471081	0.297382	0.57015	0.810542	no
ENSMUSG00000002897.5	ENSMUSG00000002897.5	Il17ra	chr6:120463246-120487559	WT_U	WT_D	OK	3.35576	3.05002	-0.137821	0.418118	0.5438	0.791178	no
ENSMUSG00000002908.15	ENSMUSG00000002908.15	Kcnn1	chr8:70842048-70857008	WT_U	WT_D	OK	0.462204	0.60355	0.384944	-1.54527	0.0287	0.10521	no
ENSMUSG00000002910.10	ENSMUSG00000002910.10	Arrdc2	chr8:70835154-70839720	WT_U	WT_D	OK	3.98147	3.6695	-0.117718	0.560925	0.42125	0.689119	no
ENSMUSG00000002948.18	ENSMUSG00000002948.18	Map2k7	chr8:4238739-4251423	WT_U	WT_D	OK	37.0957	44.1964	0.252677	-1.28033	0.0633	0.192478	no
ENSMUSG00000002949.14	ENSMUSG00000002949.14	Timm44	chr8:4259730-4275913	WT_U	WT_D	OK	80.3695	79.9179	-0.00812943	0.0419935	0.95205	0.981822	no
ENSMUSG00000002957.11	ENSMUSG00000002957.11	Ap2a2	chr7:141562172-141633011	WT_U	WT_D	OK	52.1463	46.0475	-0.179442	1.03982	0.12975	0.324068	no
ENSMUSG00000002963.16	ENSMUSG00000002963.16	Pnkp	chr7:44857138-44862992	WT_U	WT_D	OK	14.7853	15.8859	0.103583	-0.452838	0.49445	0.752406	no
ENSMUSG00000002968.7	ENSMUSG00000002968.7	Med25	chr7:44879390-44892397	WT_U	WT_D	OK	14.9652	13.4738	-0.151455	0.768275	0.2737	0.52899	no
ENSMUSG00000002980.14	ENSMUSG00000002980.14	Bcam	chr7:19756130-19775403	WT_U	WT_D	OK	0.672357	0.543825	-0.306085	0.81883	0.1625	0.378222	no
ENSMUSG00000002981.9	ENSMUSG00000002981.9	Clptm1	chr7:19631580-19665030	WT_U	WT_D	OK	21.683	21.7857	0.00681709	-0.0398142	0.95335	0.982109	no
ENSMUSG00000002983.16	ENSMUSG00000002983.16	Relb	chr7:19606216-19629438	WT_U	WT_D	OK	3.51919	2.32221	-0.599745	2.59898	0.00015	0.00125317	yes
ENSMUSG00000002984.16	ENSMUSG00000002984.16	Tomm40	chr7:19701312-19749573	WT_U	WT_D	OK	49.2836	48.2912	-0.0293473	0.145565	0.8386	0.946563	no
ENSMUSG00000002985.15	ENSMUSG00000002985.15	Apoe	chr7:19696108-19699166	WT_U	WT_D	OK	5.96039	5.32038	-0.163877	0.707023	0.30585	0.567388	no
ENSMUSG00000002996.17	ENSMUSG00000002996.17	Hbp1	chr12:31654868-31950535	WT_U	WT_D	OK	12.7539	14.7695	0.211683	-0.618598	0.3569	0.624305	no
ENSMUSG00000002997.15	ENSMUSG00000002997.15	Prkar2b	chr12:31958475-32061296	WT_U	WT_D	OK	20.4826	24.5763	0.262869	-1.37156	0.0501	0.161532	no
ENSMUSG00000003031.14	ENSMUSG00000003031.14	Cdkn1b	chr6:134920400-134925513	WT_U	WT_D	OK	63.0289	70.7585	0.16689	-0.905527	0.2035	0.439954	no
ENSMUSG00000003032.8	ENSMUSG00000003032.8	Klf4	chr4:55527142-55532466	WT_U	WT_D	OK	4.18256	3.60245	-0.215408	0.996666	0.1565	0.369031	no
ENSMUSG00000003033.14	ENSMUSG00000003033.14	Ap1m1	chr8:72240017-72257385	WT_U	WT_D	OK	59.2959	65.1765	0.13642	-0.742329	0.2822	0.538962	no
ENSMUSG00000003037.16	ENSMUSG00000003037.16	Rab8a	chr8:72161199-72183904	WT_U	WT_D	OK	93.9391	93.2545	-0.0105524	0.0371213	0.95585	0.982815	no
ENSMUSG00000003038.15	ENSMUSG00000003038.15	Hmgn2	chr4:133964737-133968650	WT_U	WT_D	OK	574.244	575.804	0.00391393	-0.0224341	0.97335	0.988507	no
ENSMUSG00000003039.8	ENSMUSG00000003039.8	Fam32a	chr8:72219729-72223764	WT_U	WT_D	OK	22.6823	29.4064	0.374563	-1.91575	0.0055	0.0278165	yes
ENSMUSG00000003051.13	ENSMUSG00000003051.13	Elf3	chr1:135248560-135284084	WT_U	WT_D	OK	0.432864	0.551531	0.349528	-0.25378	0.72815	0.902698	no
ENSMUSG00000003062.12	ENSMUSG00000003062.12	Stard3nl	chr13:19357675-19395795	WT_U	WT_D	OK	14.2446	16.8723	0.244242	-1.05678	0.1249	0.315876	no
ENSMUSG00000003068.15	ENSMUSG00000003068.15	Stk11	chr10:80115802-80145818	WT_U	WT_D	OK	47.9045	44.9419	-0.0921001	0.215295	0.74725	0.910581	no
ENSMUSG00000003070.6	ENSMUSG00000003070.6	Efna2	chr10:80179481-80190010	WT_U	WT_D	OK	4.40712	4.73463	0.103416	-0.495563	0.47785	0.738177	no
ENSMUSG00000003072.15	ENSMUSG00000003072.15	Atp5d	chr10:80115802-80145818	WT_U	WT_D	OK	332.628	292.315	-0.186386	0.900652	0.19625	0.429657	no
ENSMUSG00000003099.11	ENSMUSG00000003099.11	Ppp5c	chr7:17004639-17027924	WT_U	WT_D	OK	70.5989	61.1969	-0.206187	1.06215	0.1201	0.30743	no
ENSMUSG00000003119.14	ENSMUSG00000003119.14	Cdk12	chr11:98203058-98278504	WT_U	WT_D	OK	21.7982	23.5266	0.110084	-0.605948	0.3771	0.646016	no
ENSMUSG00000003123.15	ENSMUSG00000003123.15	Lipe	chr7:25376818-25566417	WT_U	WT_D	OK	1.63508	2.39538	0.550893	-1.89118	0.0032	0.0176662	yes
ENSMUSG00000003131.6	ENSMUSG00000003131.6	Pafah1b2	chr9:45965310-45984871	WT_U	WT_D	OK	41.1604	40.5714	-0.0207939	0.121803	0.86325	0.95462	no
ENSMUSG00000003134.10	ENSMUSG00000003134.10	Tbc1d8	chr1:39367841-39478755	WT_U	WT_D	OK	0.0527044	0.1064	1.0135	-0.0689176	0.4615	0.724515	no
ENSMUSG00000003135.15	ENSMUSG00000003135.15	Cnot11	chr1:39534991-39546889	WT_U	WT_D	OK	32.5799	31.3836	-0.0539713	0.313198	0.65325	0.861805	no
ENSMUSG00000003153.10	ENSMUSG00000003153.10	Slc2a3	chr6:122727808-122801640	WT_U	WT_D	OK	59.045	34.948	-0.756605	2.8301	5e-05	0.00046241	yes
ENSMUSG00000003154.15	ENSMUSG00000003154.15	Foxj2	chr6:122813618-122845366	WT_U	WT_D	OK	6.1803	5.42354	-0.188442	0.631095	0.34375	0.610384	no
ENSMUSG00000003161.15	ENSMUSG00000003161.15	Sri	chr5:8037293-8069379	WT_U	WT_D	OK	27.0517	24.3858	-0.149678	0.580391	0.40405	0.672873	no
ENSMUSG00000003166.19	ENSMUSG00000003166.19	Dgcr2	chr16:17835275-17894145	WT_U	WT_D	OK	24.9855	25.3919	0.0232773	-0.128253	0.85505	0.951908	no
ENSMUSG00000003184.14	ENSMUSG00000003184.14	Irf3	chr7:44997647-45002847	WT_U	WT_D	OK	16.6463	13.178	-0.33707	1.67165	0.01745	0.0711948	no
ENSMUSG00000003190.11	ENSMUSG00000003190.11	Bcl2l12	chr7:44986899-44997579	WT_U	WT_D	OK	1.00067	0.758006	-0.400685	0.767677	0.2685	0.52264	no
ENSMUSG00000003198.9	ENSMUSG00000003198.9	Zfp959	chr17:55892119-55898928	WT_U	WT_D	OK	4.86892	5.31852	0.127423	-0.613461	0.3851	0.654118	no
ENSMUSG00000003199.16	ENSMUSG00000003199.16	Mpnd	chr17:56005710-56036637	WT_U	WT_D	OK	43.6165	51.3193	0.234627	-0.971622	0.16095	0.375985	no
ENSMUSG00000003200.9	ENSMUSG00000003200.9	Sh3gl1	chr17:56005710-56036637	WT_U	WT_D	OK	23.7366	23.4038	-0.0203705	0.0761233	0.9144	0.96994	no
ENSMUSG00000003208.8	ENSMUSG00000003208.8	Ccdc94	chr17:55952622-55967949	WT_U	WT_D	OK	12.4037	12.1904	-0.0250251	0.122421	0.8593	0.953546	no
ENSMUSG00000003226.6	ENSMUSG00000003226.6	Ranbp2	chr10:58446851-58494155	WT_U	WT_D	OK	54.6032	55.97	0.0356682	-0.207163	0.7673	0.919426	no
ENSMUSG00000003228.8	ENSMUSG00000003228.8	Grk5	chr19:60889748-61140840	WT_U	WT_D	OK	6.77133	6.08456	-0.154286	0.596838	0.3942	0.663244	no
ENSMUSG00000003233.11	ENSMUSG00000003233.11	Dvl3	chr16:20511132-20532520	WT_U	WT_D	OK	25.9104	25.3777	-0.02997	0.173978	0.80585	0.934775	no
ENSMUSG00000003234.15	ENSMUSG00000003234.15	Abcf3	chr16:20548576-20561379	WT_U	WT_D	OK	20.8491	21.5022	0.0444992	-0.170189	0.80985	0.936174	no
ENSMUSG00000003235.12	ENSMUSG00000003235.12	Eif2b5	chr16:20498816-20509955	WT_U	WT_D	OK	40.0503	37.5557	-0.0927812	0.541648	0.4353	0.701565	no
ENSMUSG00000003269.14	ENSMUSG00000003269.14	Cyth2	chr7:45806636-45814581	WT_U	WT_D	OK	97.1223	120.012	0.305304	-1.414	0.0405	0.137249	no
ENSMUSG00000003271.15	ENSMUSG00000003271.15	Sult2b1	chr7:45729982-45759612	WT_U	WT_D	OK	0.121664	0.0917045	-0.407838	0.275269	0.6393	0.853402	no
ENSMUSG00000003273.13	ENSMUSG00000003273.13	Car11	chr7:45699866-45704659	WT_U	WT_D	OK	0.916443	1.25889	0.458035	-1.72253	0.0148	0.0623743	no
ENSMUSG00000003282.9	ENSMUSG00000003282.9	Plag1	chr4:3900995-3938423	WT_U	WT_D	OK	0.807587	0.827435	0.0350283	-0.0625973	0.9283	0.974488	no
ENSMUSG00000003299.9	ENSMUSG00000003299.9	Mrpl4	chr9:21002736-21008835	WT_U	WT_D	OK	20.1188	19.5617	-0.0405125	0.203385	0.7683	0.91998	no
ENSMUSG00000003308.14	ENSMUSG00000003308.14	Keap1	chr9:21225370-21239332	WT_U	WT_D	OK	15.5946	18.5048	0.246853	-1.17963	0.06575	0.197951	no
ENSMUSG00000003316.14	ENSMUSG00000003316.14	Glg1	chr8:111154420-111259216	WT_U	WT_D	OK	38.2276	36.8048	-0.0547207	0.301387	0.66	0.865944	no
ENSMUSG00000003341.8	ENSMUSG00000003341.8	Atp8b3	chr10:80519584-80539124	WT_U	WT_D	OK	0.897255	0.76488	-0.230285	1.00972	0.1535	0.364151	no
ENSMUSG00000003344.14	ENSMUSG00000003344.14	Btbd2	chr10:80642616-80657071	WT_U	WT_D	OK	21.765	19.9156	-0.128111	0.50061	0.4779	0.738209	no
ENSMUSG00000003345.15	ENSMUSG00000003345.15	Csnk1g2	chr10:80622779-80640771	WT_U	WT_D	OK	47.7843	44.4916	-0.103004	0.604626	0.38085	0.649774	no
ENSMUSG00000003346.14	ENSMUSG00000003346.14	Abhd17a	chr10:80583653-80590341	WT_U	WT_D	OK	18.0239	17.3517	-0.0548342	0.273482	0.6993	0.887973	no
ENSMUSG00000003348.9	ENSMUSG00000003348.9	Mob3a	chr10:80681837-80701820	WT_U	WT_D	OK	9.00824	9.89242	0.135078	-0.674565	0.33955	0.605758	no
ENSMUSG00000003352.13	ENSMUSG00000003352.13	Cacnb3	chr15:98632219-98644530	WT_U	WT_D	OK	18.9107	18.6476	-0.0202128	0.103969	0.8843	0.960939	no
ENSMUSG00000003354.5	ENSMUSG00000003354.5	Ccdc65	chr15:98708206-98723326	WT_U	WT_D	OK	0.154581	0.198109	0.357931	-0.830849	0.2446	0.493202	no
ENSMUSG00000003355.6	ENSMUSG00000003355.6	Fkbp11	chr15:98724372-98728198	WT_U	WT_D	OK	26.1691	22.0582	-0.246549	1.21015	0.08115	0.231213	no
ENSMUSG00000003360.14	ENSMUSG00000003360.14	Ddx23	chr15:98645133-98662889	WT_U	WT_D	OK	100.23	89.8797	-0.157247	0.373696	0.57455	0.813025	no
ENSMUSG00000003363.15	ENSMUSG00000003363.15	Pld3	chr7:27531999-27553218	WT_U	WT_D	OK	26.8798	27.3188	0.0233717	-0.0937464	0.88455	0.961044	no
ENSMUSG00000003378.9	ENSMUSG00000003378.9	Grik5	chr7:25009848-25072346	WT_U	WT_D	OK	17.4279	21.2525	0.286234	-1.10184	0.0983	0.265842	no
ENSMUSG00000003380.11	ENSMUSG00000003380.11	Rabac1	chr7:24969751-24972754	WT_U	WT_D	OK	51.4029	52.8115	0.0390024	-0.196589	0.7772	0.923732	no
ENSMUSG00000003382.18	ENSMUSG00000003382.18	Etv3	chr3:87525406-87540156	WT_U	WT_D	OK	6.68397	8.42181	0.333425	-1.65416	0.0177	0.0720242	no
ENSMUSG00000003402.13	ENSMUSG00000003402.13	Prkcsh	chr9:22003034-22014219	WT_U	WT_D	OK	55.5015	55.829	0.00848795	-0.0495643	0.9454	0.979782	no
ENSMUSG00000003410.7	ENSMUSG00000003410.7	Elavl3	chr9:22015004-22052023	WT_U	WT_D	OK	25.113	25.0689	-0.00253569	0.0148299	0.9846	0.992525	no
ENSMUSG00000003411.10	ENSMUSG00000003411.10	Rab3b	chr4:108879062-108972077	WT_U	WT_D	OK	1.79143	1.21006	-0.566033	1.89465	0.00705	0.0341805	yes
ENSMUSG00000003420.7	ENSMUSG00000003420.7	Fcgrt	chr7:45092992-45103822	WT_U	WT_D	OK	1.43952	1.54739	0.104249	-0.428896	0.541	0.78919	no
ENSMUSG00000003421.12	ENSMUSG00000003421.12	Nosip	chr7:45062428-45078503	WT_U	WT_D	OK	18.5222	18.751	0.0177121	-0.0910034	0.89555	0.964324	no
ENSMUSG00000003423.14	ENSMUSG00000003423.14	Pih1d1	chr7:45140683-45160064	WT_U	WT_D	OK	31.8882	34.5427	0.115358	-0.495695	0.48225	0.742046	no
ENSMUSG00000003429.10	ENSMUSG00000003429.10	Rps11	chr7:45122387-45124389	WT_U	WT_D	OK	880.307	915.674	0.0568273	-0.331447	0.6276	0.846422	no
ENSMUSG00000003435.8	ENSMUSG00000003435.8	Supt5	chr7:28314897-28338719	WT_U	WT_D	OK	48.407	48.0696	-0.0100909	0.0590884	0.92985	0.97491	no
ENSMUSG00000003436.11	ENSMUSG00000003436.11	Dll3	chr7:28293552-28302238	WT_U	WT_D	OK	0.444765	0.503282	0.178324	-0.45877	0.4986	0.755657	no
ENSMUSG00000003437.14	ENSMUSG00000003437.14	Paf1	chr7:28392950-28399388	WT_U	WT_D	OK	121.009	106.974	-0.177854	0.654327	0.3473	0.614106	no
ENSMUSG00000003438.17	ENSMUSG00000003438.17	Timm50	chr7:28305515-28312072	WT_U	WT_D	OK	61.7323	62.0902	0.00834004	-0.037004	0.9576	0.983484	no
ENSMUSG00000003444.8	ENSMUSG00000003444.8	Med29	chr7:28386145-28392708	WT_U	WT_D	OK	14.5679	13.4637	-0.113718	0.563335	0.41605	0.684288	no
ENSMUSG00000003452.15	ENSMUSG00000003452.15	Bicd1	chr6:149408885-149563329	WT_U	WT_D	OK	9.35172	16.0703	0.781093	-2.95179	5e-05	0.00046241	yes
ENSMUSG00000003458.12	ENSMUSG00000003458.12	Ncstn	chr1:172066012-172122330	WT_U	WT_D	OK	28.7899	28.4179	-0.0187628	0.0377737	0.95135	0.981573	no
ENSMUSG00000003464.13	ENSMUSG00000003464.13	Pex19	chr1:172126754-172136493	WT_U	WT_D	OK	31.9458	35.5368	0.153688	-0.738401	0.2423	0.490479	no
ENSMUSG00000003469.9	ENSMUSG00000003469.9	Phyhip	chr14:70457475-70468832	WT_U	WT_D	OK	0.131269	0.154857	0.23841	-0.276501	0.59325	0.824946	no
ENSMUSG00000003500.13	ENSMUSG00000003500.13	Impdh1	chr6:29200433-29216364	WT_U	WT_D	OK	30.0111	28.9568	-0.051594	0.291571	0.67165	0.87232	no
ENSMUSG00000003518.13	ENSMUSG00000003518.13	Dusp3	chr11:101971142-101992264	WT_U	WT_D	OK	21.5512	22.2354	0.0450902	-0.1297	0.82855	0.943231	no
ENSMUSG00000003526.11	ENSMUSG00000003526.11	Prodh	chr16:18052859-18090203	WT_U	WT_D	OK	0.196015	0.136694	-0.520014	0.312726	0.50015	0.756895	no
ENSMUSG00000003527.8	ENSMUSG00000003527.8	Dgcr14	chr16:17900710-17911348	WT_U	WT_D	OK	9.8758	9.93949	0.00927421	-0.0468717	0.94815	0.980735	no
ENSMUSG00000003528.14	ENSMUSG00000003528.14	Slc25a1	chr16:17925210-17928219	WT_U	WT_D	OK	102.233	113.469	0.150437	-0.698888	0.31795	0.58094	no
ENSMUSG00000003531.14	ENSMUSG00000003531.14	Dgcr6	chr16:18052859-18090203	WT_U	WT_D	OK	10.3312	13.436	0.379096	-1.75454	0.0128	0.0554881	no
ENSMUSG00000003534.17	ENSMUSG00000003534.17	Ddr1	chr17:35681566-35708244	WT_U	WT_D	OK	15.8577	14.1457	-0.16482	0.718993	0.278	0.533923	no
ENSMUSG00000003541.6	ENSMUSG00000003541.6	Ier3	chr17:35821683-35822923	WT_U	WT_D	OK	27.0771	23.3376	-0.214417	1.07642	0.12355	0.313585	no
ENSMUSG00000003545.2	ENSMUSG00000003545.2	Fosb	chr7:19302720-19310045	WT_U	WT_D	OK	0.653901	0.44019	-0.570946	2.2697	0.0009	0.00601451	yes
ENSMUSG00000003546.9	ENSMUSG00000003546.9	Klc4	chr17:46442447-46831413	WT_U	WT_D	OK	3.50243	3.77898	0.109641	-0.0614136	0.93045	0.975131	no
ENSMUSG00000003549.9	ENSMUSG00000003549.9	Ercc1	chr7:19344777-19356524	WT_U	WT_D	OK	10.0498	9.4131	-0.094425	0.422076	0.531	0.781451	no
ENSMUSG00000003559.7	ENSMUSG00000003559.7	As3mt	chr19:46707442-46741095	WT_U	WT_D	OK	30.4841	35.5047	0.219953	-1.19451	0.0864	0.24194	no
ENSMUSG00000003573.15	ENSMUSG00000003573.15	Homer3	chr8:70282826-70302489	WT_U	WT_D	OK	18.0661	20.385	0.174223	-0.49691	0.4744	0.735308	no
ENSMUSG00000003575.13	ENSMUSG00000003575.13	Crtc1	chr8:70382354-70439579	WT_U	WT_D	OK	7.88573	9.27526	0.234143	-0.655624	0.3365	0.602603	no
ENSMUSG00000003581.14	ENSMUSG00000003581.14	Rnf215	chr11:4135201-4160293	WT_U	WT_D	OK	6.43408	6.70723	0.0599832	-0.19766	0.77495	0.922775	no
ENSMUSG00000003585.13	ENSMUSG00000003585.13	Sec14l2	chr11:4097038-4123415	WT_U	WT_D	OK	1.60699	1.12475	-0.514757	1.21744	0.07175	0.211044	no
ENSMUSG00000003604.14	ENSMUSG00000003604.14	Aven	chr2:112492963-113217096	WT_U	WT_D	OK	23.3383	23.6588	0.0196774	-0.0740655	0.9155	0.970344	no
ENSMUSG00000003617.16	ENSMUSG00000003617.16	Cp	chr3:19957053-20035315	WT_U	WT_D	OK	0.111724	0.367731	1.71871	-0.73176	0.034	0.119876	no
ENSMUSG00000003623.4	ENSMUSG00000003623.4	Crot	chr5:8966032-8997427	WT_U	WT_D	OK	14.0925	14.9231	0.0826197	-0.413849	0.5598	0.803155	no
ENSMUSG00000003644.17	ENSMUSG00000003644.17	Rps6ka1	chr4:133847289-133887797	WT_U	WT_D	OK	32.0422	29.2048	-0.133768	0.600356	0.28565	0.543252	no
ENSMUSG00000003660.10	ENSMUSG00000003660.10	Snrnp200	chr2:127208385-127240451	WT_U	WT_D	OK	47.4238	45.7058	-0.053234	0.269984	0.66985	0.871586	no
ENSMUSG00000003662.10	ENSMUSG00000003662.10	Ciao1	chr2:127240937-127247816	WT_U	WT_D	OK	41.9496	43.9398	0.0668712	-0.270865	0.69255	0.884355	no
ENSMUSG00000003680.15	ENSMUSG00000003680.15	Taf6l	chr19:8772521-8786417	WT_U	WT_D	OK	19.2286	19.8184	0.0435868	-0.18526	0.79045	0.929153	no
ENSMUSG00000003721.14	ENSMUSG00000003721.14	Insig2	chr1:121304352-121332589	WT_U	WT_D	OK	12.3946	13.1142	0.0814181	-0.275203	0.6538	0.862179	no
ENSMUSG00000003731.13	ENSMUSG00000003731.13	Kpna6	chr4:129643979-129672767	WT_U	WT_D	OK	20.0954	18.3277	-0.13284	0.560362	0.3004	0.561216	no
ENSMUSG00000003752.9	ENSMUSG00000003752.9	Itpkc	chr7:27187004-27228661	WT_U	WT_D	OK	3.47108	3.73496	0.105708	-0.17894	0.783	0.926154	no
ENSMUSG00000003762.13	ENSMUSG00000003762.13	Adck4	chr7:27233022-27282144	WT_U	WT_D	OK	4.77414	4.521	-0.078599	0.176693	0.7937	0.93018	no
ENSMUSG00000003778.14	ENSMUSG00000003778.14	Brd8	chr18:34598614-34624601	WT_U	WT_D	OK	58.1458	57.5133	-0.0157794	0.052193	0.94005	0.978116	no
ENSMUSG00000003779.15	ENSMUSG00000003779.15	Kif20a	chr18:34624623-34651735	WT_U	WT_D	OK	42.2012	38.4035	-0.136046	0.636457	0.36525	0.633405	no
ENSMUSG00000003808.18	ENSMUSG00000003808.18	Farsa	chr8:84856988-84869257	WT_U	WT_D	OK	54.0285	53.3579	-0.0180187	0.100923	0.88405	0.96092	no
ENSMUSG00000003809.14	ENSMUSG00000003809.14	Gcdh	chr8:84872110-84893921	WT_U	WT_D	OK	6.92241	6.38356	-0.116913	0.450802	0.51015	0.76521	no
ENSMUSG00000003810.12	ENSMUSG00000003810.12	Mast2	chr4:116306761-116464183	WT_U	WT_D	OK	29.5298	28.0896	-0.0721355	0.261085	0.6749	0.873913	no
ENSMUSG00000003812.13	ENSMUSG00000003812.13	Dnase2a	chr8:84908559-84937359	WT_U	WT_D	OK	1.03897	0.755134	-0.460349	0.217686	0.64085	0.854367	no
ENSMUSG00000003813.15	ENSMUSG00000003813.15	Rad23a	chr8:84831521-84840665	WT_U	WT_D	OK	66.6267	64.3071	-0.0511224	0.234776	0.7312	0.903963	no
ENSMUSG00000003814.8	ENSMUSG00000003814.8	Calr	chr8:84841849-84846934	WT_U	WT_D	OK	626.701	677.456	0.11235	-0.568807	0.4155	0.68372	no
ENSMUSG00000003824.12	ENSMUSG00000003824.12	Syce2	chr8:84872110-84893921	WT_U	WT_D	OK	0.273012	0.241606	-0.176308	0.0865858	0.91895	0.971509	no
ENSMUSG00000003847.16	ENSMUSG00000003847.16	Nfat5	chr8:107293469-107379517	WT_U	WT_D	OK	43.3026	45.1349	0.0597898	-0.150715	0.7608	0.916415	no
ENSMUSG00000003848.14	ENSMUSG00000003848.14	Nob1	chr8:107412485-107425051	WT_U	WT_D	OK	58.1751	57.6581	-0.0128785	0.0686688	0.9159	0.97043	no
ENSMUSG00000003849.8	ENSMUSG00000003849.8	Nqo1	chr8:107388224-107403206	WT_U	WT_D	OK	3.85813	3.20206	-0.268901	1.22231	0.08015	0.229139	no
ENSMUSG00000003863.16	ENSMUSG00000003863.16	Ppfia3	chr7:45339125-45370583	WT_U	WT_D	OK	5.97778	6.97751	0.223102	-1.03452	0.11845	0.304412	no
ENSMUSG00000003865.14	ENSMUSG00000003865.14	Gys1	chr7:45420819-45456619	WT_U	WT_D	OK	17.5351	22.3994	0.353214	-0.960804	0.09165	0.25254	no
ENSMUSG00000003868.12	ENSMUSG00000003868.12	Ruvbl2	chr7:45420819-45456619	WT_U	WT_D	OK	85.8325	87.6722	0.0305954	-0.125597	0.8591	0.953525	no
ENSMUSG00000003872.7	ENSMUSG00000003872.7	Lin7b	chr7:45339125-45370583	WT_U	WT_D	OK	0.646707	0.485307	-0.414215	0.166629	0.7215	0.899362	no
ENSMUSG00000003873.10	ENSMUSG00000003873.10	Bax	chr7:45461694-45466898	WT_U	WT_D	OK	90.6512	102.408	0.17593	-1.02306	0.1436	0.347654	no
ENSMUSG00000003923.14	ENSMUSG00000003923.14	Tfam	chr10:71225463-71238280	WT_U	WT_D	OK	60.7231	66.8212	0.13806	-0.475769	0.4908	0.74939	no
ENSMUSG00000003929.10	ENSMUSG00000003929.10	Zfp81	chr17:33329341-33358878	WT_U	WT_D	OK	7.83136	8.3296	0.0889843	-0.483426	0.48845	0.747636	no
ENSMUSG00000003934.5	ENSMUSG00000003934.5	Efnb3	chr11:69554091-69560205	WT_U	WT_D	OK	0.355621	0.316572	-0.167807	0.580686	0.4041	0.672873	no
ENSMUSG00000003948.16	ENSMUSG00000003948.16	Mmd	chr11:90187683-90278589	WT_U	WT_D	OK	31.7547	51.7446	0.704438	-4.07592	5e-05	0.00046241	yes
ENSMUSG00000003949.16	ENSMUSG00000003949.16	Hlf	chr11:90336535-90390895	WT_U	WT_D	OK	6.11098	6.05569	-0.0131124	0.0567692	0.93315	0.976052	no
ENSMUSG00000003955.7	ENSMUSG00000003955.7	Fam162a	chr16:36043843-36071515	WT_U	WT_D	OK	78.4314	52.128	-0.589373	2.98122	5e-05	0.00046241	yes
ENSMUSG00000003970.8	ENSMUSG00000003970.8	Rpl8	chr15:76904070-76906318	WT_U	WT_D	OK	1918.75	1821.62	-0.0749447	0.397912	0.57795	0.815005	no
ENSMUSG00000003992.14	ENSMUSG00000003992.14	Ssbp2	chr13:91460282-91786148	WT_U	WT_D	OK	71.6707	51.7657	-0.469387	2.5314	0.00035	0.00265006	yes
ENSMUSG00000004018.9	ENSMUSG00000004018.9	Fancl	chr11:26386134-26593999	WT_U	WT_D	OK	3.97335	4.58617	0.206934	-0.579977	0.40055	0.669532	no
ENSMUSG00000004031.13	ENSMUSG00000004031.13	Brinp2	chr1:158245268-158356326	WT_U	WT_D	OK	3.44905	2.65838	-0.375652	1.83689	0.0082	0.0387017	yes
ENSMUSG00000004032.10	ENSMUSG00000004032.10	Gstm5	chr3:107877228-107898686	WT_U	WT_D	OK	50.0946	49.8393	-0.00737129	0.033209	0.9625	0.985093	no
ENSMUSG00000004035.12	ENSMUSG00000004035.12	Gstm7	chr3:107926333-107931817	WT_U	WT_D	OK	0.957406	1.53793	0.683787	-1.83	0.0092	0.0425044	yes
ENSMUSG00000004040.16	ENSMUSG00000004040.16	Stat3	chr11:100859350-100939540	WT_U	WT_D	OK	26.8421	17.9936	-0.577014	2.53228	5e-05	0.00046241	yes
ENSMUSG00000004043.14	ENSMUSG00000004043.14	Stat5a	chr11:100859350-100939540	WT_U	WT_D	OK	1.73293	1.44233	-0.264812	0.262892	0.6115	0.836771	no
ENSMUSG00000004044.9	ENSMUSG00000004044.9	Ptrf	chr11:100956732-100970887	WT_U	WT_D	OK	9.51972	5.10068	-0.90023	4.37447	5e-05	0.00046241	yes
ENSMUSG00000004054.8	ENSMUSG00000004054.8	Map3k11	chr19:5689130-5702862	WT_U	WT_D	OK	6.95503	7.17971	0.0458688	-0.231588	0.73745	0.906808	no
ENSMUSG00000004056.15	ENSMUSG00000004056.15	Akt2	chr7:27591551-27640826	WT_U	WT_D	OK	31.7126	29.3435	-0.112015	0.550433	0.40895	0.677492	no
ENSMUSG00000004069.16	ENSMUSG00000004069.16	Dnaja3	chr16:4626132-4707695	WT_U	WT_D	OK	35.5186	50.6456	0.511862	-2.54356	0.00035	0.00265006	yes
ENSMUSG00000004070.15	ENSMUSG00000004070.15	Hmox2	chr16:4726360-4790292	WT_U	WT_D	OK	42.9307	37.0046	-0.214305	0.877297	0.18195	0.408325	no
ENSMUSG00000004071.12	ENSMUSG00000004071.12	Cdip1	chr16:4726360-4790292	WT_U	WT_D	OK	16.124	19.4058	0.267278	-0.92607	0.165	0.382158	no
ENSMUSG00000004096.8	ENSMUSG00000004096.8	Cwc15	chr9:14500616-14510577	WT_U	WT_D	OK	71.8801	70.2122	-0.0338707	0.197068	0.78215	0.925816	no
ENSMUSG00000004098.7	ENSMUSG00000004098.7	Col5a3	chr9:20770049-20815067	WT_U	WT_D	OK	0.935722	0.768963	-0.283166	1.26561	0.0706	0.208524	no
ENSMUSG00000004099.15	ENSMUSG00000004099.15	Dnmt1	chr9:20907205-20959888	WT_U	WT_D	OK	67.4789	59.9952	-0.169589	0.983214	0.1612	0.376324	no
ENSMUSG00000004100.11	ENSMUSG00000004100.11	Ppan	chr9:20888174-20892178	WT_U	WT_D	OK	92.7185	92.2772	-0.006883	0.0270414	0.96975	0.98752	no
ENSMUSG00000004105.8	ENSMUSG00000004105.8	Angptl2	chr2:33133416-33371486	WT_U	WT_D	OK	4.34188	2.21428	-0.971482	2.13103	0.00315	0.0174353	yes
ENSMUSG00000004113.18	ENSMUSG00000004113.18	Cacna1b	chr2:24603886-24763152	WT_U	WT_D	OK	15.9429	16.8194	0.0772122	-0.163847	0.7543	0.914003	no
ENSMUSG00000004127.12	ENSMUSG00000004127.12	Trmt10a	chr3:138089853-138159821	WT_U	WT_D	OK	23.1525	17.7215	-0.385667	0.974426	0.15845	0.371923	no
ENSMUSG00000004151.16	ENSMUSG00000004151.16	Etv1	chr12:38779379-38868215	WT_U	WT_D	OK	10.5283	7.21313	-0.545575	1.53455	0.0121	0.0530411	no
ENSMUSG00000004187.10	ENSMUSG00000004187.10	Kifc2	chr15:76660640-76668196	WT_U	WT_D	OK	0.552884	0.631416	0.191614	-0.749417	0.28165	0.538219	no
ENSMUSG00000004207.14	ENSMUSG00000004207.14	Psap	chr10:60277626-60302597	WT_U	WT_D	OK	263.128	253.378	-0.0544735	0.316823	0.65015	0.859797	no
ENSMUSG00000004221.16	ENSMUSG00000004221.16	Ikbkg	chrX:74393289-74453854	WT_U	WT_D	OK	21.4376	22.9338	0.097332	-0.159839	0.82085	0.94028	no
ENSMUSG00000004233.14	ENSMUSG00000004233.14	Wars2	chr3:99141067-99239186	WT_U	WT_D	OK	3.92407	4.42262	0.172551	-0.357297	0.5928	0.824641	no
ENSMUSG00000004263.15	ENSMUSG00000004263.15	Atn1	chr6:124739182-124756524	WT_U	WT_D	OK	51.8188	54.3459	0.0686956	-0.246984	0.69465	0.885431	no
ENSMUSG00000004264.17	ENSMUSG00000004264.17	Phb2	chr6:124712335-124718831	WT_U	WT_D	OK	170.226	158.655	-0.101558	0.56162	0.4089	0.677454	no
ENSMUSG00000004266.15	ENSMUSG00000004266.15	Ptpn6	chr6:124720706-124738714	WT_U	WT_D	OK	1.04364	0.523152	-0.996322	2.12211	0.00035	0.00265006	yes
ENSMUSG00000004267.16	ENSMUSG00000004267.16	Eno2	chr6:124760052-124769673	WT_U	WT_D	OK	25.9561	24.8787	-0.0611625	0.223524	0.73475	0.90567	no
ENSMUSG00000004268.11	ENSMUSG00000004268.11	Emg1	chr6:124663026-124712178	WT_U	WT_D	OK	93.6199	86.5815	-0.112756	0.444663	0.5116	0.766501	no
ENSMUSG00000004270.13	ENSMUSG00000004270.13	Lpcat3	chr6:124663026-124712178	WT_U	WT_D	OK	37.8313	53.1729	0.491111	-1.35385	0.04815	0.156641	no
ENSMUSG00000004285.12	ENSMUSG00000004285.12	Atp6v1f	chr6:29467717-29470512	WT_U	WT_D	OK	46.07	56.4441	0.292995	-1.47155	0.0353	0.123546	no
ENSMUSG00000004317.14	ENSMUSG00000004317.14	Clcn5	chrX:7153809-7319358	WT_U	WT_D	OK	12.5616	13.8683	0.142771	-0.326718	0.5343	0.783901	no
ENSMUSG00000004319.15	ENSMUSG00000004319.15	Clcn3	chr8:60910388-60983300	WT_U	WT_D	OK	47.4749	58.7895	0.308394	-1.73029	0.01315	0.0567133	no
ENSMUSG00000004328.15	ENSMUSG00000004328.15	Hif3a	chr7:17031506-17062427	WT_U	WT_D	OK	0.147139	0.0407711	-1.85156	1.65566	0.00015	0.00125317	yes
ENSMUSG00000004347.16	ENSMUSG00000004347.16	Pde1c	chr6:56069803-56569103	WT_U	WT_D	OK	4.45126	4.4537	0.00079061	-0.00161537	0.9979	0.998917	no
ENSMUSG00000004356.7	ENSMUSG00000004356.7	Utp20	chr10:88746606-88826814	WT_U	WT_D	OK	16.2295	17.4211	0.102217	-0.598542	0.39475	0.663847	no
ENSMUSG00000004360.8	ENSMUSG00000004360.8	9330159F19Rik	chr10:29211642-29230779	WT_U	WT_D	OK	6.37951	6.54402	0.0367315	-0.187062	0.78475	0.926868	no
ENSMUSG00000004364.14	ENSMUSG00000004364.14	Cul3	chr1:80264922-80340480	WT_U	WT_D	OK	90.803	85.9618	-0.0790443	0.393171	0.5486	0.794952	no
ENSMUSG00000004371.14	ENSMUSG00000004371.14	Il11	chr7:4772372-4782857	WT_U	WT_D	OK	0.51464	0.428884	-0.262976	0.820693	0.2359	0.482604	no
ENSMUSG00000004383.17	ENSMUSG00000004383.17	Large	chr8:72814598-73353540	WT_U	WT_D	OK	10.9129	11.3666	0.0587662	-0.298049	0.6702	0.871725	no
ENSMUSG00000004393.10	ENSMUSG00000004393.10	Ddx56	chr11:6258918-6267772	WT_U	WT_D	OK	33.7818	35.5901	0.0752298	-0.356441	0.6077	0.834581	no
ENSMUSG00000004394.12	ENSMUSG00000004394.12	Tmed4	chr11:6270368-6274870	WT_U	WT_D	OK	52.4442	59.0229	0.170492	-0.901302	0.19615	0.429467	no
ENSMUSG00000004415.15	ENSMUSG00000004415.15	Col26a1	chr5:136741758-136883209	WT_U	WT_D	OK	0.493359	0.484745	-0.0254118	0.0738309	0.89935	0.965289	no
ENSMUSG00000004446.12	ENSMUSG00000004446.12	Bid	chr6:120836211-120916853	WT_U	WT_D	OK	13.5195	14.6612	0.116961	-0.271788	0.64145	0.854724	no
ENSMUSG00000004451.14	ENSMUSG00000004451.14	Ralb	chr1:119470304-119504794	WT_U	WT_D	OK	23.3806	21.4117	-0.126913	0.637523	0.35635	0.623681	no
ENSMUSG00000004455.16	ENSMUSG00000004455.16	Ppp1cc	chr5:122158277-122175273	WT_U	WT_D	OK	109.856	98.1554	-0.162474	0.843804	0.2061	0.443623	no
ENSMUSG00000004460.16	ENSMUSG00000004460.16	Dnajb11	chr16:22857844-22879634	WT_U	WT_D	OK	88.8381	76.5652	-0.21449	1.25078	0.07005	0.207456	no
ENSMUSG00000004462.6	ENSMUSG00000004462.6	Tbccd1	chr16:22813214-22857569	WT_U	WT_D	OK	7.43097	7.86966	0.0827508	-0.413827	0.551	0.79659	no
ENSMUSG00000004473.10	ENSMUSG00000004473.10	Clec11a	chr7:44302686-44306902	WT_U	WT_D	OK	0.428767	0.500996	0.224605	-0.825629	0.2425	0.490745	no
ENSMUSG00000004500.8	ENSMUSG00000004500.8	Zfp324	chr7:12965837-12974236	WT_U	WT_D	OK	3.55447	4.19359	0.238551	-1.18428	0.09125	0.251743	no
ENSMUSG00000004508.6	ENSMUSG00000004508.6	Gab2	chr7:97081585-97308946	WT_U	WT_D	OK	8.84528	9.50884	0.104362	-0.467557	0.50345	0.759561	no
ENSMUSG00000004530.12	ENSMUSG00000004530.12	Coro1c	chr5:113842435-113908758	WT_U	WT_D	OK	111.501	109.511	-0.0259809	0.124104	0.8304	0.943761	no
ENSMUSG00000004535.12	ENSMUSG00000004535.12	Tax1bp1	chr6:52713343-52766780	WT_U	WT_D	OK	43.1565	45.7435	0.0839889	-0.480411	0.48195	0.741789	no
ENSMUSG00000004558.14	ENSMUSG00000004558.14	Ndrg2	chr14:51905270-51913488	WT_U	WT_D	OK	6.16645	3.02849	-1.02584	4.90648	5e-05	0.00046241	yes
ENSMUSG00000004561.14	ENSMUSG00000004561.14	Mettl17	chr14:51884841-51896745	WT_U	WT_D	OK	15.086	15.4753	0.036757	-0.131913	0.8513	0.950797	no
ENSMUSG00000004562.16	ENSMUSG00000004562.16	Arhgef40	chr14:51984718-52020733	WT_U	WT_D	OK	30.4727	19.7508	-0.625606	1.44455	0.0093	0.0428893	yes
ENSMUSG00000004565.14	ENSMUSG00000004565.14	Pnpla6	chr8:3515383-3544266	WT_U	WT_D	OK	6.43199	7.74301	0.267629	-1.36595	0.05165	0.165285	no
ENSMUSG00000004567.15	ENSMUSG00000004567.15	Mcoln1	chr8:3500456-3515232	WT_U	WT_D	OK	55.0617	69.6716	0.339522	-1.09046	0.11675	0.30138	no
ENSMUSG00000004568.12	ENSMUSG00000004568.12	Arhgef18	chr8:3393005-3456601	WT_U	WT_D	OK	15.0852	12.3388	-0.289932	1.54216	0.0216	0.0841516	no
ENSMUSG00000004591.16	ENSMUSG00000004591.16	Pkn2	chr3:142790901-142898582	WT_U	WT_D	OK	43.9832	40.2751	-0.127064	0.50467	0.44445	0.709657	no
ENSMUSG00000004610.4	ENSMUSG00000004610.4	Etfb	chr7:43444082-43472019	WT_U	WT_D	OK	98.8399	113.139	0.194931	-1.03711	0.1372	0.336773	no
ENSMUSG00000004626.14	ENSMUSG00000004626.14	Stxbp2	chr8:3630954-3643644	WT_U	WT_D	OK	18.585	18.2213	-0.0285128	0.0955565	0.87865	0.959485	no
ENSMUSG00000004631.15	ENSMUSG00000004631.15	Sgce	chr6:4674349-4747207	WT_U	WT_D	OK	35.912	36.5646	0.0259816	-0.143279	0.83625	0.945721	no
ENSMUSG00000004633.17	ENSMUSG00000004633.17	Chn2	chr6:54039553-54566489	WT_U	WT_D	OK	49.8045	37.9827	-0.390934	1.13887	0.08235	0.233701	no
ENSMUSG00000004637.15	ENSMUSG00000004637.15	Wwox	chr8:114439654-115352708	WT_U	WT_D	OK	9.70162	9.55366	-0.0221721	0.104875	0.87845	0.95941	no
ENSMUSG00000004642.13	ENSMUSG00000004642.13	Slbp	chr5:33634951-33678995	WT_U	WT_D	OK	62.8011	57.6658	-0.123074	0.381059	0.58325	0.818538	no
ENSMUSG00000004661.15	ENSMUSG00000004661.15	Arid3b	chr9:57777864-57836793	WT_U	WT_D	OK	3.59337	2.90365	-0.30747	1.35215	0.0494	0.159748	no
ENSMUSG00000004665.10	ENSMUSG00000004665.10	Cnn2	chr10:79988583-79996062	WT_U	WT_D	OK	53.2765	30.8372	-0.788828	4.06303	5e-05	0.00046241	yes
ENSMUSG00000004667.18	ENSMUSG00000004667.18	Polr2e	chr10:80035948-80039795	WT_U	WT_D	OK	108.466	98.6306	-0.137136	0.790237	0.25415	0.504939	no
ENSMUSG00000004677.15	ENSMUSG00000004677.15	Myo9b	chr8:71248560-71360712	WT_U	WT_D	OK	13.3458	14.539	0.123542	-0.637691	0.3656	0.633836	no
ENSMUSG00000004698.9	ENSMUSG00000004698.9	Hdac9	chr12:34371502-34528889	WT_U	WT_D	OK	7.47331	4.36152	-0.776916	3.91314	5e-05	0.00046241	yes
ENSMUSG00000004748.5	ENSMUSG00000004748.5	Mtfp1	chr11:4091479-4095445	WT_U	WT_D	OK	24.107	19.8815	-0.278026	1.20332	0.07875	0.226156	no
ENSMUSG00000004768.14	ENSMUSG00000004768.14	Rab23	chr1:33719886-33742564	WT_U	WT_D	OK	32.1671	32.046	-0.00544159	0.0158023	0.9828	0.991919	no
ENSMUSG00000004771.12	ENSMUSG00000004771.12	Rab11a	chr9:64715298-64737758	WT_U	WT_D	OK	147.449	138.194	-0.0935211	0.424836	0.54435	0.791587	no
ENSMUSG00000004788.11	ENSMUSG00000004788.11	Eif2b2	chr12:85219480-85226628	WT_U	WT_D	OK	203.785	193.49	-0.0747889	0.273579	0.6961	0.88611	no
ENSMUSG00000004789.9	ENSMUSG00000004789.9	Dlst	chr12:85110832-85134091	WT_U	WT_D	OK	72.4836	64.676	-0.164424	0.963018	0.1705	0.390626	no
ENSMUSG00000004791.6	ENSMUSG00000004791.6	Pgf	chr12:85166638-85177296	WT_U	WT_D	OK	11.3026	5.80653	-0.960907	4.66804	5e-05	0.00046241	yes
ENSMUSG00000004798.14	ENSMUSG00000004798.14	Ulk2	chr11:61775648-61855073	WT_U	WT_D	OK	3.92387	5.52389	0.493407	-2.15224	0.00115	0.00741326	yes
ENSMUSG00000004815.12	ENSMUSG00000004815.12	Dgkq	chr5:108629769-108684557	WT_U	WT_D	OK	5.7973	7.63285	0.396841	-0.937975	0.1658	0.383418	no
ENSMUSG00000004843.6	ENSMUSG00000004843.6	Chmp2b	chr16:65539132-65562697	WT_U	WT_D	OK	6.52956	6.09211	-0.100044	0.485379	0.4874	0.746542	no
ENSMUSG00000004846.10	ENSMUSG00000004846.10	Plod3	chr5:136982163-136996648	WT_U	WT_D	OK	69.6945	64.2148	-0.118139	0.447649	0.52245	0.774924	no
ENSMUSG00000004849.14	ENSMUSG00000004849.14	Ap1s1	chr5:137034992-137046135	WT_U	WT_D	OK	129.517	107.004	-0.275477	1.28803	0.0703	0.207926	no
ENSMUSG00000004865.15	ENSMUSG00000004865.15	Srpk1	chr17:28587647-28622521	WT_U	WT_D	OK	70.6058	72.8655	0.0454492	-0.172049	0.7982	0.931976	no
ENSMUSG00000004872.15	ENSMUSG00000004872.15	Pax3	chr1:78101266-78197134	WT_U	WT_D	OK	1.54306	2.25777	0.549104	-2.53734	0.00035	0.00265006	yes
ENSMUSG00000004880.11	ENSMUSG00000004880.11	Lbr	chr1:181806000-181843046	WT_U	WT_D	OK	34.8968	35.2076	0.0127921	-0.0459397	0.9308	0.975233	no
ENSMUSG00000004885.5	ENSMUSG00000004885.5	Crabp2	chr3:87948665-87953376	WT_U	WT_D	OK	0.474819	0.423514	-0.164968	0.395706	0.5679	0.80895	no
ENSMUSG00000004891.16	ENSMUSG00000004891.16	Nes	chr3:87971077-87980451	WT_U	WT_D	OK	23.4998	21.3137	-0.140867	0.78258	0.2496	0.499634	no
ENSMUSG00000004892.13	ENSMUSG00000004892.13	Bcan	chr3:87987530-88000230	WT_U	WT_D	OK	6.21448	6.03168	-0.0430738	0.179523	0.79255	0.929821	no
ENSMUSG00000004895.9	ENSMUSG00000004895.9	Prcc	chr3:87858902-87885608	WT_U	WT_D	OK	34.0156	31.3457	-0.117929	0.685425	0.3264	0.590788	no
ENSMUSG00000004896.16	ENSMUSG00000004896.16	Rrnad1	chr3:87919505-87940686	WT_U	WT_D	OK	11.8868	12.563	0.0798206	-0.191229	0.7624	0.917185	no
ENSMUSG00000004897.16	ENSMUSG00000004897.16	Hdgf	chr3:87906320-87916132	WT_U	WT_D	OK	328.264	263.899	-0.314871	1.51455	0.027	0.100407	no
ENSMUSG00000004929.12	ENSMUSG00000004929.12	Thop1	chr10:81070034-81082559	WT_U	WT_D	OK	41.5217	37.7698	-0.136632	0.718114	0.28565	0.543252	no
ENSMUSG00000004931.10	ENSMUSG00000004931.10	Apba3	chr10:81268171-81291267	WT_U	WT_D	OK	17.2185	16.9499	-0.0226827	0.11292	0.87265	0.957549	no
ENSMUSG00000004933.17	ENSMUSG00000004933.17	Matk	chr10:81252934-81263365	WT_U	WT_D	OK	0.740609	0.967973	0.386255	-1.35194	0.0466	0.152844	no
ENSMUSG00000004934.13	ENSMUSG00000004934.13	Pias4	chr10:81153265-81167923	WT_U	WT_D	OK	17.0761	16.615	-0.0394922	0.157202	0.82295	0.940864	no
ENSMUSG00000004936.8	ENSMUSG00000004936.8	Map2k1	chr9:64185769-64253631	WT_U	WT_D	OK	34.6933	30.4011	-0.190534	1.06354	0.11935	0.306026	no
ENSMUSG00000004937.5	ENSMUSG00000004937.5	Sgta	chr10:81044074-81060178	WT_U	WT_D	OK	64.0956	63.2708	-0.0186855	0.109262	0.87455	0.958127	no
ENSMUSG00000004945.15	ENSMUSG00000004945.15	Tmem242	chr17:5388762-5440259	WT_U	WT_D	OK	40.6354	37.3359	-0.122174	0.611727	0.3855	0.654453	no
ENSMUSG00000004947.15	ENSMUSG00000004947.15	Dtx2	chr5:135994799-136032872	WT_U	WT_D	OK	8.27659	8.86475	0.0990435	-0.462894	0.4927	0.750929	no
ENSMUSG00000004952.13	ENSMUSG00000004952.13	Rasa4	chr5:136083915-136111860	WT_U	WT_D	OK	1.04363	1.14889	0.13863	-0.387251	0.53735	0.786269	no
ENSMUSG00000004961.7	ENSMUSG00000004961.7	Syt5	chr7:4539764-4547541	WT_U	WT_D	OK	7.5285	6.46914	-0.218789	0.989756	0.1357	0.334336	no
ENSMUSG00000004980.16	ENSMUSG00000004980.16	Hnrnpa2b1	chr6:51460931-51469894	WT_U	WT_D	OK	1247.03	1122.24	-0.152115	0.719223	0.30015	0.561	no
ENSMUSG00000004994.12	ENSMUSG00000004994.12	Ccdc130	chr8:84257794-84270380	WT_U	WT_D	OK	37.053	39.7311	0.100678	-0.29094	0.6809	0.877475	no
ENSMUSG00000004996.9	ENSMUSG00000004996.9	Mri1	chr8:84249905-84257326	WT_U	WT_D	OK	8.36572	8.38605	0.00350172	-0.0131848	0.9844	0.992463	no
ENSMUSG00000005034.15	ENSMUSG00000005034.15	Prkacb	chr3:146729573-146812990	WT_U	WT_D	OK	24.4505	24.7543	0.0178152	-0.0876951	0.8891	0.962304	no
ENSMUSG00000005043.13	ENSMUSG00000005043.13	Sgsh	chr11:119307767-119355536	WT_U	WT_D	OK	6.42148	4.19602	-0.613884	1.99433	0.00515	0.0263483	yes
ENSMUSG00000005045.16	ENSMUSG00000005045.16	Chd5	chr4:152338650-152390194	WT_U	WT_D	OK	6.80723	6.16858	-0.142129	0.409125	0.302	0.563029	no
ENSMUSG00000005054.6	ENSMUSG00000005054.6	Cstb	chr10:78425669-78427619	WT_U	WT_D	OK	109.971	154.44	0.489923	-2.65956	5e-05	0.00046241	yes
ENSMUSG00000005057.13	ENSMUSG00000005057.13	Sh2b2	chr5:136218146-136246556	WT_U	WT_D	OK	10.6936	11.992	0.165325	-0.700341	0.2509	0.501265	no
ENSMUSG00000005069.12	ENSMUSG00000005069.12	Pex5	chr6:124396815-124415067	WT_U	WT_D	OK	17.4172	17.1481	-0.022464	0.0968027	0.8856	0.961403	no
ENSMUSG00000005078.16	ENSMUSG00000005078.16	Jkamp	chr12:72085588-72185029	WT_U	WT_D	OK	23.4075	23.0562	-0.0218161	0.104797	0.876	0.958636	no
ENSMUSG00000005102.13	ENSMUSG00000005102.13	Eif2ak4	chr2:118388617-118475234	WT_U	WT_D	OK	8.09281	8.56729	0.0821982	-0.335545	0.5894	0.822366	no
ENSMUSG00000005103.12	ENSMUSG00000005103.12	Wdr1	chr5:38526812-38563221	WT_U	WT_D	OK	96.3917	88.3222	-0.126133	0.594924	0.3788	0.647655	no
ENSMUSG00000005107.13	ENSMUSG00000005107.13	Slc2a9	chr5:38349272-38503143	WT_U	WT_D	OK	1.29769	1.02298	-0.343168	1.39536	0.0329	0.116911	no
ENSMUSG00000005124.9	ENSMUSG00000005124.9	Wisp1	chr15:66891319-66923201	WT_U	WT_D	OK	4.68809	5.92154	0.336972	-1.55307	0.02005	0.0794255	no
ENSMUSG00000005125.12	ENSMUSG00000005125.12	Ndrg1	chr15:66929320-67013039	WT_U	WT_D	OK	4.91158	5.16086	0.0714243	-0.308774	0.6241	0.844145	no
ENSMUSG00000005131.3	ENSMUSG00000005131.3	4930550C14Rik	chr9:53405285-53432803	WT_U	WT_D	OK	1.69083	1.628	-0.0546309	0.213517	0.76145	0.91668	no
ENSMUSG00000005142.9	ENSMUSG00000005142.9	Man2b1	chr8:85083268-85098739	WT_U	WT_D	OK	8.35876	6.11862	-0.450083	2.28224	0.00105	0.0068582	yes
ENSMUSG00000005148.7	ENSMUSG00000005148.7	Klf5	chr14:99298690-99313405	WT_U	WT_D	OK	20.1827	17.6562	-0.192944	0.977854	0.15935	0.373388	no
ENSMUSG00000005150.16	ENSMUSG00000005150.16	Wdr83	chr8:85071756-85082339	WT_U	WT_D	OK	14.8217	16.5632	0.16027	-0.429619	0.53305	0.782943	no
ENSMUSG00000005161.15	ENSMUSG00000005161.15	Prdx2	chr8:84956609-84974834	WT_U	WT_D	OK	164.524	159.299	-0.0465608	0.243811	0.72305	0.900062	no
ENSMUSG00000005198.15	ENSMUSG00000005198.15	Polr2a	chr11:69733996-69758637	WT_U	WT_D	OK	96.0573	89.4261	-0.103199	0.580067	0.3891	0.658078	no
ENSMUSG00000005202.2	ENSMUSG00000005202.2	Shbg	chr11:69614803-69617905	WT_U	WT_D	OK	5.55467	5.92831	0.0939197	-0.435748	0.53195	0.782194	no
ENSMUSG00000005204.12	ENSMUSG00000005204.12	Senp3	chr11:69673114-69682084	WT_U	WT_D	OK	34.7084	33.7312	-0.0412012	0.0784217	0.81945	0.93992	no
ENSMUSG00000005225.15	ENSMUSG00000005225.15	Plekha8	chr6:54577603-54645839	WT_U	WT_D	OK	12.9577	12.247	-0.0813813	0.361104	0.6019	0.830577	no
ENSMUSG00000005233.16	ENSMUSG00000005233.16	Spc25	chr2:69193894-69206194	WT_U	WT_D	OK	49.0264	40.9503	-0.259685	1.17459	0.08465	0.238492	no
ENSMUSG00000005262.12	ENSMUSG00000005262.12	Ufd1l	chr16:18780446-18835261	WT_U	WT_D	OK	32.0735	35.2476	0.136143	-0.474985	0.47845	0.738694	no
ENSMUSG00000005267.13	ENSMUSG00000005267.13	Zfp287	chr11:62700355-62731905	WT_U	WT_D	OK	5.0488	5.1312	0.0233557	-0.10919	0.8763	0.958745	no
ENSMUSG00000005299.6	ENSMUSG00000005299.6	Letm1	chr5:33739672-33782817	WT_U	WT_D	OK	21.0344	18.7275	-0.167592	0.545448	0.42	0.687781	no
ENSMUSG00000005312.14	ENSMUSG00000005312.14	Ubqln1	chr13:58176155-58215653	WT_U	WT_D	OK	79.5761	76.8459	-0.0503669	0.293203	0.6754	0.874255	no
ENSMUSG00000005338.13	ENSMUSG00000005338.13	Cadm3	chr1:173331885-173466040	WT_U	WT_D	OK	0.112883	0.126299	0.162015	-0.0610625	0.92045	0.972022	no
ENSMUSG00000005354.15	ENSMUSG00000005354.15	Txn2	chr15:77915046-77929006	WT_U	WT_D	OK	189.364	171.536	-0.142651	0.752872	0.24385	0.492353	no
ENSMUSG00000005362.14	ENSMUSG00000005362.14	Crbn	chr6:106769119-106800077	WT_U	WT_D	OK	15.451	15.8722	0.0388019	-0.104539	0.8758	0.958606	no
ENSMUSG00000005370.3	ENSMUSG00000005370.3	Msh6	chr17:87975049-88065291	WT_U	WT_D	OK	22.3685	21.9173	-0.0293984	0.114625	0.87305	0.957549	no
ENSMUSG00000005371.14	ENSMUSG00000005371.14	Fbxo11	chr17:87975049-88065291	WT_U	WT_D	OK	35.6053	36.0124	0.0164017	-0.0612982	0.93045	0.975131	no
ENSMUSG00000005374.13	ENSMUSG00000005374.13	Tbl2	chr5:135149656-135165760	WT_U	WT_D	OK	17.1427	14.3614	-0.255398	0.801937	0.20985	0.448687	no
ENSMUSG00000005378.17	ENSMUSG00000005378.17	Wbscr22	chr5:135052956-135065862	WT_U	WT_D	OK	52.9981	50.0035	-0.0839116	0.196931	0.7634	0.917749	no
ENSMUSG00000005397.7	ENSMUSG00000005397.7	Nid1	chr13:13437601-13512275	WT_U	WT_D	OK	1.83851	1.07552	-0.773503	3.68681	5e-05	0.00046241	yes
ENSMUSG00000005410.5	ENSMUSG00000005410.5	Mcm5	chr8:75109527-75128439	WT_U	WT_D	OK	48.2116	47.371	-0.0253762	0.148604	0.83055	0.94377	no
ENSMUSG00000005413.7	ENSMUSG00000005413.7	Hmox1	chr8:75093590-75100596	WT_U	WT_D	OK	46.7025	60.5719	0.375149	-2.17251	0.0018	0.0108711	yes
ENSMUSG00000005417.17	ENSMUSG00000005417.17	Mprip	chr11:59661304-59780860	WT_U	WT_D	OK	70.3502	70.1816	-0.00346169	0.0172336	0.97985	0.990827	no
ENSMUSG00000005442.13	ENSMUSG00000005442.13	Cic	chr7:25267703-25294159	WT_U	WT_D	OK	32.0305	35.169	0.134858	-0.306553	0.55425	0.799141	no
ENSMUSG00000005447.12	ENSMUSG00000005447.12	Pafah1b3	chr7:25295048-25297986	WT_U	WT_D	OK	38.9087	38.0632	-0.0316959	0.158987	0.8227	0.94074	no
ENSMUSG00000005465.8	ENSMUSG00000005465.8	Il27ra	chr8:84021470-84042575	WT_U	WT_D	OK	2.27397	1.43702	-0.662133	2.945	5e-05	0.00046241	yes
ENSMUSG00000005469.9	ENSMUSG00000005469.9	Prkaca	chr8:83972977-83996445	WT_U	WT_D	OK	79.2626	65.0658	-0.284741	1.6675	0.01775	0.072169	no
ENSMUSG00000005470.8	ENSMUSG00000005470.8	Asf1b	chr8:83955506-83970197	WT_U	WT_D	OK	65.546	53.1874	-0.301423	1.08011	0.11945	0.306181	no
ENSMUSG00000005481.17	ENSMUSG00000005481.17	Ddx39	chr8:83715176-83741326	WT_U	WT_D	OK	79.5485	67.3989	-0.23911	1.36425	0.05225	0.166758	no
ENSMUSG00000005483.9	ENSMUSG00000005483.9	Dnajb1	chr8:83608174-83611902	WT_U	WT_D	OK	32.9112	36.7721	0.160033	-0.931907	0.1881	0.417424	no
ENSMUSG00000005493.15	ENSMUSG00000005493.15	Msh4	chr3:153857148-153906138	WT_U	WT_D	OK	0.111417	0.0556419	-1.00173	1.64849	0.01055	0.0475189	yes
ENSMUSG00000005501.14	ENSMUSG00000005501.14	Usp40	chr1:87853286-88008551	WT_U	WT_D	OK	3.95476	4.6169	0.223334	-0.419984	0.49735	0.75471	no
ENSMUSG00000005505.12	ENSMUSG00000005505.12	Kbtbd4	chr2:90894633-90918258	WT_U	WT_D	OK	7.50565	7.8177	0.0587672	-0.117803	0.83555	0.945485	no
ENSMUSG00000005506.16	ENSMUSG00000005506.16	Celf1	chr2:90940381-91019497	WT_U	WT_D	OK	64.1607	62.0699	-0.0477961	0.201598	0.7054	0.891455	no
ENSMUSG00000005510.9	ENSMUSG00000005510.9	Ndufs3	chr2:90894633-90918258	WT_U	WT_D	OK	64.2283	60.7889	-0.0794012	0.341664	0.6261	0.8454	no
ENSMUSG00000005514.14	ENSMUSG00000005514.14	Por	chr5:135653809-135735326	WT_U	WT_D	OK	80.6261	90.9224	0.173389	-0.774035	0.26245	0.515308	no
ENSMUSG00000005533.9	ENSMUSG00000005533.9	Igf1r	chr7:67952858-68226780	WT_U	WT_D	OK	9.50314	7.83366	-0.278718	1.42104	0.0431	0.14411	no
ENSMUSG00000005534.9	ENSMUSG00000005534.9	Insr	chr8:3150921-3279617	WT_U	WT_D	OK	9.85103	10.7498	0.125963	-0.72882	0.29585	0.555637	no
ENSMUSG00000005566.13	ENSMUSG00000005566.13	Trim28	chr7:13024151-13031035	WT_U	WT_D	OK	150.969	157.872	0.064503	-0.292283	0.64305	0.855704	no
ENSMUSG00000005575.15	ENSMUSG00000005575.15	Ube2m	chr7:13035119-13038275	WT_U	WT_D	OK	104.26	102.639	-0.0226067	0.112644	0.8717	0.957381	no
ENSMUSG00000005580.11	ENSMUSG00000005580.11	Adcy9	chr16:4287528-4420498	WT_U	WT_D	OK	1.59279	1.96884	0.30579	-1.44398	0.0397	0.135104	no
ENSMUSG00000005609.15	ENSMUSG00000005609.15	Ctr9	chr7:111028950-111056377	WT_U	WT_D	OK	26.2348	27.3889	0.0621095	-0.320251	0.60545	0.833055	no
ENSMUSG00000005610.16	ENSMUSG00000005610.16	Eif4g2	chr7:111070567-111083030	WT_U	WT_D	OK	506.2	523.22	0.0477102	-0.140746	0.80515	0.934482	no
ENSMUSG00000005611.15	ENSMUSG00000005611.15	Mrvi1	chr7:110868265-110982461	WT_U	WT_D	OK	4.45127	2.19494	-1.02004	2.26549	0.00075	0.0051382	yes
ENSMUSG00000005615.14	ENSMUSG00000005615.14	Pcyt1a	chr16:32430920-32475070	WT_U	WT_D	OK	15.1529	15.3609	0.0196688	-0.0625653	0.9183	0.97138	no
ENSMUSG00000005621.11	ENSMUSG00000005621.11	Zfp592	chr7:80993680-81045164	WT_U	WT_D	OK	6.98807	6.93165	-0.0116952	0.0293623	0.96465	0.985924	no
ENSMUSG00000005625.15	ENSMUSG00000005625.15	Psmd4	chr3:95032693-95042614	WT_U	WT_D	OK	119.063	124.402	0.0632845	-0.357934	0.6033	0.831467	no
ENSMUSG00000005628.12	ENSMUSG00000005628.12	Tmod4	chr3:95124475-95129209	WT_U	WT_D	OK	0.668734	0.710801	0.0880132	-0.221965	0.735	0.905783	no
ENSMUSG00000005656.8	ENSMUSG00000005656.8	Snx6	chr12:54746348-54795703	WT_U	WT_D	OK	50.6247	48.1075	-0.0735796	0.429553	0.54165	0.789575	no
ENSMUSG00000005667.8	ENSMUSG00000005667.8	Mthfd2	chr6:83305690-83325908	WT_U	WT_D	OK	162.032	174.313	0.105401	-0.581523	0.3863	0.655223	no
ENSMUSG00000005674.9	ENSMUSG00000005674.9	Tomm40l	chr1:171213969-171222514	WT_U	WT_D	OK	15.0661	15.1139	0.00456997	-0.0145815	0.98455	0.992504	no
ENSMUSG00000005682.8	ENSMUSG00000005682.8	Pan2	chr10:128303334-128321358	WT_U	WT_D	OK	15.4582	17.441	0.17411	-1.0142	0.15185	0.361409	no
ENSMUSG00000005683.7	ENSMUSG00000005683.7	Cs	chr10:128337831-128362479	WT_U	WT_D	OK	173.004	163.998	-0.0771272	0.448626	0.5159	0.769881	no
ENSMUSG00000005686.16	ENSMUSG00000005686.16	Ampd3	chr7:110768205-110844457	WT_U	WT_D	OK	18.6164	12.3129	-0.596404	1.51694	0.01665	0.0686154	no
ENSMUSG00000005687.14	ENSMUSG00000005687.14	Bcas2	chr3:103171654-103179166	WT_U	WT_D	OK	84.6574	77.6681	-0.124314	0.674434	0.3321	0.597639	no
ENSMUSG00000005698.15	ENSMUSG00000005698.15	Ctcf	chr8:105566323-105682922	WT_U	WT_D	OK	79.51	76.669	-0.052493	0.149868	0.8285	0.943227	no
ENSMUSG00000005699.15	ENSMUSG00000005699.15	Pard6a	chr8:105701153-105703493	WT_U	WT_D	OK	9.7679	12.7167	0.380604	-1.87274	0.0067	0.0327802	yes
ENSMUSG00000005705.10	ENSMUSG00000005705.10	Agrp	chr8:105566323-105682922	WT_U	WT_D	OK	0.0915659	0.00730387	-3.64808	0.131057	0.2776	0.533523	no
ENSMUSG00000005718.7	ENSMUSG00000005718.7	Tfap4	chr16:4544660-4559720	WT_U	WT_D	OK	6.54518	7.53811	0.20377	-1.00394	0.15285	0.363013	no
ENSMUSG00000005732.14	ENSMUSG00000005732.14	Ranbp1	chr16:18239783-18289249	WT_U	WT_D	OK	622.904	565.508	-0.139462	0.722552	0.2966	0.556451	no
ENSMUSG00000005763.15	ENSMUSG00000005763.15	Cd247	chr1:165781074-166002678	WT_U	WT_D	OK	0.0913804	0.0566617	-0.689511	0.128614	0.51555	0.769542	no
ENSMUSG00000005774.12	ENSMUSG00000005774.12	Rfx5	chr3:94954074-94962048	WT_U	WT_D	OK	6.15233	6.45699	0.0697289	-0.231469	0.7031	0.890372	no
ENSMUSG00000005779.12	ENSMUSG00000005779.12	Psmb4	chr3:94884092-94886961	WT_U	WT_D	OK	112.848	115.256	0.030461	-0.171038	0.79835	0.932021	no
ENSMUSG00000005802.12	ENSMUSG00000005802.12	Slc30a4	chr2:122681232-122721456	WT_U	WT_D	OK	10.5043	11.9251	0.183021	-1.01093	0.14615	0.352007	no
ENSMUSG00000005803.14	ENSMUSG00000005803.14	Sqrdl	chr2:122765236-122809569	WT_U	WT_D	OK	0.845315	2.18001	1.36677	-4.1591	5e-05	0.00046241	yes
ENSMUSG00000005804.14	ENSMUSG00000005804.14	Bloc1s6	chr2:122738502-122749475	WT_U	WT_D	OK	25.1636	27.6746	0.137224	-0.389326	0.5563	0.800633	no
ENSMUSG00000005813.12	ENSMUSG00000005813.12	Metap1	chr3:138458955-138489515	WT_U	WT_D	OK	37.7871	39.3725	0.0592945	-0.296318	0.6653	0.869222	no
ENSMUSG00000005823.8	ENSMUSG00000005823.8	Gpr108	chr17:57234913-57247641	WT_U	WT_D	OK	6.98886	8.67535	0.311865	-1.54349	0.02895	0.105871	no
ENSMUSG00000005846.11	ENSMUSG00000005846.11	Rsl1d1	chr16:11192969-11203331	WT_U	WT_D	OK	139.281	144.941	0.0574673	-0.320946	0.6434	0.855905	no
ENSMUSG00000005871.14	ENSMUSG00000005871.14	Apc	chr18:34207774-34322189	WT_U	WT_D	OK	18.1956	18.8966	0.0545371	-0.178989	0.7115	0.894419	no
ENSMUSG00000005873.5	ENSMUSG00000005873.5	Reep5	chr18:34344888-34373415	WT_U	WT_D	OK	25.1138	23.2451	-0.111554	0.6492	0.3533	0.620391	no
ENSMUSG00000005881.13	ENSMUSG00000005881.13	Ergic3	chr2:156008044-156018279	WT_U	WT_D	OK	38.2566	39.203	0.0352554	-0.161951	0.8141	0.937787	no
ENSMUSG00000005882.18	ENSMUSG00000005882.18	Uqcc1	chr2:155846893-155930310	WT_U	WT_D	OK	55.5904	55.471	-0.00310203	0.0116733	0.98635	0.993389	no
ENSMUSG00000005886.14	ENSMUSG00000005886.14	Ncoa2	chr1:13139104-13374083	WT_U	WT_D	OK	17.2564	19.1696	0.151689	-0.356574	0.5617	0.804545	no
ENSMUSG00000005893.14	ENSMUSG00000005893.14	Nr2c2	chr6:92091389-92184033	WT_U	WT_D	OK	15.378	15.7859	0.0377686	-0.127014	0.8098	0.936171	no
ENSMUSG00000005897.14	ENSMUSG00000005897.14	Nr2c1	chr10:94148022-94197211	WT_U	WT_D	OK	5.48466	6.15028	0.16525	-0.801099	0.2558	0.507081	no
ENSMUSG00000005899.12	ENSMUSG00000005899.12	Smpd4	chr16:17619353-17644828	WT_U	WT_D	OK	27.7169	26.8864	-0.0438893	0.15263	0.81425	0.937885	no
ENSMUSG00000005907.14	ENSMUSG00000005907.14	Pex1	chr5:3571565-3680325	WT_U	WT_D	OK	12.1871	12.2507	0.00750932	-0.0127159	0.98395	0.992279	no
ENSMUSG00000005917.15	ENSMUSG00000005917.15	Otx1	chr11:21994763-22002897	WT_U	WT_D	OK	5.32574	6.39867	0.26479	-1.28093	0.0648	0.195768	no
ENSMUSG00000005936.18	ENSMUSG00000005936.18	Kctd20	chr17:28951949-28969549	WT_U	WT_D	OK	36.6584	38.297	0.0630876	-0.279208	0.6772	0.875296	no
ENSMUSG00000005949.9	ENSMUSG00000005949.9	Ctns	chr11:73183595-73199042	WT_U	WT_D	OK	2.72872	4.34385	0.67075	-2.72159	0.0002	0.00162246	yes
ENSMUSG00000005951.13	ENSMUSG00000005951.13	Shpk	chr11:73199459-73224511	WT_U	WT_D	OK	0.540257	1.08604	1.00736	-4.02192	5e-05	0.00046241	yes
ENSMUSG00000005958.14	ENSMUSG00000005958.14	Ephb3	chr16:21204754-21223305	WT_U	WT_D	OK	0.5128	1.04799	1.03116	-4.29673	5e-05	0.00046241	yes
ENSMUSG00000005968.14	ENSMUSG00000005968.14	Tuft1	chr3:94612756-94658872	WT_U	WT_D	OK	3.26638	2.31753	-0.495105	1.88724	0.00435	0.0228744	yes
ENSMUSG00000005973.6	ENSMUSG00000005973.6	Rcn1	chr2:105386290-105399319	WT_U	WT_D	OK	38.8936	34.599	-0.168802	0.986046	0.1514	0.36069	no
ENSMUSG00000005981.11	ENSMUSG00000005981.11	Trap1	chr16:4032838-4077827	WT_U	WT_D	OK	60.5488	61.0967	0.0129961	-0.0755681	0.9116	0.969163	no
ENSMUSG00000005982.13	ENSMUSG00000005982.13	Naa60	chr16:3847267-3941147	WT_U	WT_D	OK	27.6015	22.9176	-0.268291	0.72304	0.21665	0.457853	no
ENSMUSG00000005983.15	ENSMUSG00000005983.15	1700037C18Rik	chr16:3847267-3941147	WT_U	WT_D	OK	2.06041	2.03352	-0.0189523	0.0153431	0.97925	0.99063	no
ENSMUSG00000005986.15	ENSMUSG00000005986.15	Ankrd13d	chr19:4270179-4283137	WT_U	WT_D	OK	1.429	1.23101	-0.215163	0.789242	0.23875	0.486043	no
ENSMUSG00000006005.17	ENSMUSG00000006005.17	Tpr	chr1:150361304-150466165	WT_U	WT_D	OK	110.055	101.806	-0.112402	0.315467	0.6201	0.841803	no
ENSMUSG00000006010.14	ENSMUSG00000006010.14	BC003331	chr1:150361304-150466165	WT_U	WT_D	OK	29.0387	29.2361	0.009774	-0.0128097	0.9838	0.992227	no
ENSMUSG00000006019.15	ENSMUSG00000006019.15	Dhx34	chr7:16197146-16222037	WT_U	WT_D	OK	2.44895	2.66096	0.119784	-0.552136	0.4228	0.690651	no
ENSMUSG00000006021.5	ENSMUSG00000006021.5	Kptn	chr7:16119894-16127516	WT_U	WT_D	OK	5.03286	5.75964	0.1946	-0.751639	0.27175	0.526613	no
ENSMUSG00000006024.12	ENSMUSG00000006024.12	Napa	chr7:16098457-16117975	WT_U	WT_D	OK	23.2984	24.7592	0.0877338	-0.292957	0.67085	0.871993	no
ENSMUSG00000006050.11	ENSMUSG00000006050.11	Sra1	chr18:36666680-36683861	WT_U	WT_D	OK	53.9763	53.0604	-0.0246905	0.0883527	0.9003	0.965591	no
ENSMUSG00000006057.15	ENSMUSG00000006057.15	Atp5g1	chr11:96068851-96075670	WT_U	WT_D	OK	120.31	118.415	-0.0229047	0.113348	0.8763	0.958745	no
ENSMUSG00000006058.10	ENSMUSG00000006058.10	Snf8	chr11:96034884-96047430	WT_U	WT_D	OK	77.1601	74.3815	-0.0529112	0.30344	0.66545	0.869293	no
ENSMUSG00000006095.12	ENSMUSG00000006095.12	Tbcb	chr7:30224130-30233390	WT_U	WT_D	OK	64.4374	64.6765	0.00534333	-0.0214316	0.97575	0.989127	no
ENSMUSG00000006127.9	ENSMUSG00000006127.9	Inpp5k	chr11:75630987-75648871	WT_U	WT_D	OK	3.93181	4.01673	0.0308279	-0.110224	0.8755	0.958518	no
ENSMUSG00000006134.3	ENSMUSG00000006134.3	Crkl	chr16:17451986-17486255	WT_U	WT_D	OK	17.6396	18.4029	0.0611153	-0.355748	0.61555	0.839367	no
ENSMUSG00000006154.13	ENSMUSG00000006154.13	Eps8l1	chr7:4445696-4480487	WT_U	WT_D	OK	0.154645	0.0292011	-2.40487	0.76369	0.00175	0.0106113	yes
ENSMUSG00000006169.19	ENSMUSG00000006169.19	Clint1	chr11:45852050-45910625	WT_U	WT_D	OK	47.5452	47.6243	0.00239819	-0.0139169	0.98635	0.993389	no
ENSMUSG00000006179.8	ENSMUSG00000006179.8	Prss16	chr13:22002175-22009742	WT_U	WT_D	OK	0.474022	0.409656	-0.210541	0.479083	0.488	0.747175	no
ENSMUSG00000006191.17	ENSMUSG00000006191.17	Cdkal1	chr13:29191745-29855674	WT_U	WT_D	OK	9.91438	9.80427	-0.0161123	0.0572545	0.934	0.976319	no
ENSMUSG00000006205.13	ENSMUSG00000006205.13	Htra1	chr7:130162450-133124354	WT_U	WT_D	OK	0.0283211	0.0965772	1.76981	-0.0761395	0.31075	0.572925	no
ENSMUSG00000006215.12	ENSMUSG00000006215.12	Zbtb17	chr4:141444653-141538597	WT_U	WT_D	OK	17.5855	16.5603	-0.0866575	0.155878	0.80185	0.933229	no
ENSMUSG00000006219.12	ENSMUSG00000006219.12	Fblim1	chr4:141576061-141606096	WT_U	WT_D	OK	2.79847	1.67712	-0.738652	2.6181	5e-05	0.00046241	yes
ENSMUSG00000006235.5	ENSMUSG00000006235.5	Epor	chr9:21958898-21963576	WT_U	WT_D	OK	1.89892	1.01919	-0.897756	3.66461	5e-05	0.00046241	yes
ENSMUSG00000006241.15	ENSMUSG00000006241.15	Ccdc159	chr9:21921009-21935872	WT_U	WT_D	OK	1.27234	1.93425	0.60429	-1.49554	0.03405	0.120023	no
ENSMUSG00000006262.15	ENSMUSG00000006262.15	Mob1b	chr5:88720854-88764220	WT_U	WT_D	OK	17.7412	16.4487	-0.10913	0.505823	0.45065	0.71544	no
ENSMUSG00000006269.7	ENSMUSG00000006269.7	Atp6v1b1	chr6:83742989-83758855	WT_U	WT_D	OK	0.0952014	0.116653	0.293169	-0.322566	0.59225	0.824276	no
ENSMUSG00000006270.7	ENSMUSG00000006270.7	Vax1	chr19:59166186-59170056	WT_U	WT_D	OK	7.33215	6.14532	-0.254748	1.16501	0.09205	0.253336	no
ENSMUSG00000006273.14	ENSMUSG00000006273.14	Atp6v1b2	chr8:69037710-69113711	WT_U	WT_D	OK	59.7021	63.6143	0.0915694	-0.465122	0.45615	0.72028	no
ENSMUSG00000006276.9	ENSMUSG00000006276.9	Eps15l1	chr8:72341000-72421474	WT_U	WT_D	OK	19.4317	22.0534	0.182589	-1.06157	0.1277	0.320674	no
ENSMUSG00000006281.7	ENSMUSG00000006281.7	Tep1	chr14:50824061-50879003	WT_U	WT_D	OK	2.42575	2.35111	-0.0450888	0.217551	0.75555	0.91439	no
ENSMUSG00000006288.7	ENSMUSG00000006288.7	Ttc5	chr14:50765414-50785518	WT_U	WT_D	OK	13.6704	14.3485	0.0698445	-0.351456	0.61865	0.840837	no
ENSMUSG00000006289.14	ENSMUSG00000006289.14	Osgep	chr14:50906477-50924893	WT_U	WT_D	OK	42.9506	42.965	0.00048361	-0.00213825	0.9969	0.998315	no
ENSMUSG00000006299.13	ENSMUSG00000006299.13	Aamp	chr1:74279839-74284738	WT_U	WT_D	OK	137.741	134.829	-0.0308272	0.171932	0.8026	0.933466	no
ENSMUSG00000006301.17	ENSMUSG00000006301.17	Tmbim1	chr1:74284929-74353694	WT_U	WT_D	OK	14.5033	12.8571	-0.173816	0.337337	0.61835	0.840668	no
ENSMUSG00000006304.14	ENSMUSG00000006304.14	Arpc2	chr1:74236083-74268209	WT_U	WT_D	OK	482.126	375.447	-0.360801	2.09134	0.0026	0.0148564	yes
ENSMUSG00000006307.16	ENSMUSG00000006307.16	Kmt2b	chr7:30568857-30588726	WT_U	WT_D	OK	27.4271	26.6764	-0.0400381	0.0994145	0.88095	0.960008	no
ENSMUSG00000006310.10	ENSMUSG00000006310.10	Zbtb32	chr7:30589680-30598909	WT_U	WT_D	OK	0.635903	0.495235	-0.360693	0.937709	0.1842	0.411659	no
ENSMUSG00000006311.8	ENSMUSG00000006311.8	Etv2	chr7:30633615-30635852	WT_U	WT_D	OK	2.21564	1.87396	-0.241633	0.944505	0.1763	0.399547	no
ENSMUSG00000006313.4	ENSMUSG00000006313.4	Upk1a	chr7:30603091-30612734	WT_U	WT_D	OK	0.328789	0.31599	-0.0572831	0.144205	0.8372	0.946102	no
ENSMUSG00000006315.8	ENSMUSG00000006315.8	Tmem147	chr7:30727700-30729534	WT_U	WT_D	OK	38.1833	44.3285	0.215293	-1.08948	0.12135	0.309751	no
ENSMUSG00000006333.14	ENSMUSG00000006333.14	Rps9	chr7:3703992-3706897	WT_U	WT_D	OK	1275.92	1388.03	0.121501	-0.666783	0.33835	0.604457	no
ENSMUSG00000006335.16	ENSMUSG00000006335.16	Tfpt	chr7:3617372-3629929	WT_U	WT_D	OK	16.3435	16.5401	0.017251	-0.0550392	0.93795	0.97745	no
ENSMUSG00000006342.14	ENSMUSG00000006342.14	Susd2	chr10:75636618-75644008	WT_U	WT_D	OK	0.958184	0.382283	-1.32566	5.10648	5e-05	0.00046241	yes
ENSMUSG00000006344.16	ENSMUSG00000006344.16	Ggt5	chr10:75589339-75617200	WT_U	WT_D	OK	0.331376	0.281023	-0.237781	0.345863	0.62805	0.846687	no
ENSMUSG00000006345.10	ENSMUSG00000006345.10	Ggt1	chr10:75561603-75586200	WT_U	WT_D	OK	0.811707	0.440423	-0.882069	1.89145	0.0011	0.00713086	yes
ENSMUSG00000006356.10	ENSMUSG00000006356.10	Crip2	chr12:113140235-113145506	WT_U	WT_D	OK	125.193	79.0683	-0.662983	3.60272	5e-05	0.00046241	yes
ENSMUSG00000006360.11	ENSMUSG00000006360.11	Crip1	chr12:113146315-113153879	WT_U	WT_D	OK	112.455	53.4862	-1.07211	5.27096	5e-05	0.00046241	yes
ENSMUSG00000006369.14	ENSMUSG00000006369.14	Fbln1	chr15:85205948-85286535	WT_U	WT_D	OK	154.428	113.989	-0.43804	2.49782	0.0005	0.00361297	yes
ENSMUSG00000006373.10	ENSMUSG00000006373.10	Pgrmc1	chrX:36598205-36606079	WT_U	WT_D	OK	23.6621	28.9268	0.289829	-1.48193	0.0348	0.122116	no
ENSMUSG00000006378.13	ENSMUSG00000006378.13	Gcat	chr15:79030873-79043558	WT_U	WT_D	OK	14.0046	16.2512	0.214645	-1.06771	0.1262	0.318087	no
ENSMUSG00000006386.15	ENSMUSG00000006386.15	Tek	chr4:94739288-94874976	WT_U	WT_D	OK	0.177327	0.215981	0.284492	-0.634396	0.3172	0.580215	no
ENSMUSG00000006390.15	ENSMUSG00000006390.15	Elovl1	chr4:118428092-118437352	WT_U	WT_D	OK	30.2255	29.7572	-0.0225274	0.0787743	0.91345	0.969699	no
ENSMUSG00000006392.16	ENSMUSG00000006392.16	Med8	chr4:118409336-118415782	WT_U	WT_D	OK	41.4213	44.701	0.109934	-0.538992	0.43985	0.705629	no
ENSMUSG00000006395.16	ENSMUSG00000006395.16	Hyi	chr4:118359989-118409273	WT_U	WT_D	OK	5.96216	7.81593	0.390582	-0.77581	0.2715	0.526363	no
ENSMUSG00000006398.15	ENSMUSG00000006398.15	Cdc20	chr4:118428092-118437352	WT_U	WT_D	OK	32.7904	31.4338	-0.0609568	0.266344	0.6852	0.879836	no
ENSMUSG00000006403.12	ENSMUSG00000006403.12	Adamts4	chr1:171234852-171260637	WT_U	WT_D	OK	9.85861	8.14434	-0.275586	0.699461	0.3169	0.579825	no
ENSMUSG00000006411.12	ENSMUSG00000006411.12	Pvrl4	chr1:171370098-171388598	WT_U	WT_D	OK	0.951027	1.4849	0.642808	-2.81713	0.0001	0.000870202	yes
ENSMUSG00000006412.10	ENSMUSG00000006412.10	Pfdn2	chr1:171345669-171360798	WT_U	WT_D	OK	195.588	175.165	-0.159103	0.757379	0.2773	0.533191	no
ENSMUSG00000006418.17	ENSMUSG00000006418.17	Rnf114	chr2:167481132-167516173	WT_U	WT_D	OK	25.4332	31.4087	0.304451	-1.40799	0.0455	0.150076	no
ENSMUSG00000006423.15	ENSMUSG00000006423.15	C330007P06Rik	chrX:36823736-36884222	WT_U	WT_D	OK	8.85761	7.90438	-0.164265	0.588978	0.35005	0.617074	no
ENSMUSG00000006435.15	ENSMUSG00000006435.15	Neurl1a	chr19:47178819-47259440	WT_U	WT_D	OK	7.55111	8.57467	0.183392	-0.935721	0.1839	0.411246	no
ENSMUSG00000006442.10	ENSMUSG00000006442.10	Srm	chr4:148591502-148594993	WT_U	WT_D	OK	224.14	230.119	0.03798	-0.218569	0.7477	0.910841	no
ENSMUSG00000006456.10	ENSMUSG00000006456.10	Rbm14	chr19:4711207-4811634	WT_U	WT_D	OK	26.1546	23.9752	-0.125522	0.582755	0.4078	0.676404	no
ENSMUSG00000006457.3	ENSMUSG00000006457.3	Actn3	chr19:4861222-4877909	WT_U	WT_D	OK	0.16652	0.132532	-0.329355	0.811392	0.22955	0.4743	no
ENSMUSG00000006463.13	ENSMUSG00000006463.13	Zdhhc24	chr19:4878667-4885397	WT_U	WT_D	OK	6.83531	7.8088	0.192094	-0.871383	0.21915	0.461355	no
ENSMUSG00000006464.8	ENSMUSG00000006464.8	Bbs1	chr19:4886897-4906627	WT_U	WT_D	OK	1.57611	1.8578	0.237227	-1.14149	0.1015	0.271963	no
ENSMUSG00000006471.17	ENSMUSG00000006471.17	Ndor1	chr2:25244820-25256292	WT_U	WT_D	OK	14.0906	15.7043	0.156427	-0.400044	0.54955	0.795627	no
ENSMUSG00000006476.19	ENSMUSG00000006476.19	Nsmf	chr2:25054354-25062881	WT_U	WT_D	OK	17.8968	19.1024	0.0940523	-0.282277	0.68635	0.880523	no
ENSMUSG00000006494.11	ENSMUSG00000006494.11	Pdk1	chr2:71873223-71903858	WT_U	WT_D	OK	3.18597	0.555309	-2.52037	6.13497	5e-05	0.00046241	yes
ENSMUSG00000006498.16	ENSMUSG00000006498.16	Ptbp1	chr10:79851380-79883174	WT_U	WT_D	OK	253.468	246.735	-0.0388412	0.156544	0.78455	0.926767	no
ENSMUSG00000006526.11	ENSMUSG00000006526.11	Tmem110	chr14:30825589-30876986	WT_U	WT_D	OK	6.86821	6.6788	-0.0403452	0.14178	0.8394	0.946835	no
ENSMUSG00000006527.14	ENSMUSG00000006527.14	Sfmbt1	chr14:30714848-30822713	WT_U	WT_D	OK	4.18034	5.03379	0.268025	-1.1903	0.08715	0.243468	no
ENSMUSG00000006538.10	ENSMUSG00000006538.10	Ihh	chr1:74945314-74951672	WT_U	WT_D	OK	0.0876778	0.0766138	-0.194607	0.362602	0.589	0.822198	no
ENSMUSG00000006546.3	ENSMUSG00000006546.3	Cryba2	chr1:74889933-74893143	WT_U	WT_D	OK	0.294133	0.803647	1.45009	-3.115	0.0001	0.000870202	yes
ENSMUSG00000006567.11	ENSMUSG00000006567.11	Atp7b	chr8:21992784-22060305	WT_U	WT_D	OK	0.705029	0.535064	-0.397971	1.71319	0.0166	0.0684572	no
ENSMUSG00000006575.14	ENSMUSG00000006575.14	Rundc3a	chr11:102393402-102402555	WT_U	WT_D	OK	161.42	150.353	-0.102466	0.360421	0.5966	0.827228	no
ENSMUSG00000006576.16	ENSMUSG00000006576.16	Slc4a3	chr1:75546265-75562172	WT_U	WT_D	OK	8.95852	10.4101	0.216652	-0.550486	0.40315	0.672096	no
ENSMUSG00000006586.15	ENSMUSG00000006586.15	Runx1t1	chr4:13743435-13893649	WT_U	WT_D	OK	0.23313	0.513749	1.13993	-2.9251	5e-05	0.00046241	yes
ENSMUSG00000006599.13	ENSMUSG00000006599.13	Gtf2h1	chr7:46796102-46823800	WT_U	WT_D	OK	28.6902	31.2626	0.12388	-0.547714	0.436	0.702275	no
ENSMUSG00000006611.14	ENSMUSG00000006611.14	Hfe	chr13:23702033-23710854	WT_U	WT_D	OK	1.39298	2.29787	0.722123	-3.03863	5e-05	0.00046241	yes
ENSMUSG00000006638.14	ENSMUSG00000006638.14	Abhd1	chr5:30950065-30960361	WT_U	WT_D	OK	6.17865	6.03615	-0.033663	0.0510118	0.93665	0.977123	no
ENSMUSG00000006641.12	ENSMUSG00000006641.12	Slc5a6	chr5:31036035-31054623	WT_U	WT_D	OK	8.56232	7.49034	-0.192971	0.405125	0.5634	0.805863	no
ENSMUSG00000006642.3	ENSMUSG00000006642.3	Tcf23	chr5:30968661-30977018	WT_U	WT_D	OK	0.0724113	0.0519352	-0.479502	1.03317	0.14565	0.351225	no
ENSMUSG00000006649.16	ENSMUSG00000006649.16	Nphs1	chr7:30458314-30487223	WT_U	WT_D	OK	0.238737	0.212434	-0.168407	0.24036	0.73215	0.904457	no
ENSMUSG00000006651.7	ENSMUSG00000006651.7	Aplp1	chr7:30434980-30445582	WT_U	WT_D	OK	31.143	35.6846	0.196394	-1.14462	0.1046	0.277914	no
ENSMUSG00000006673.14	ENSMUSG00000006673.14	Qrich1	chr9:108516805-108560163	WT_U	WT_D	OK	45.3449	44.7353	-0.0195266	0.0721059	0.9142	0.969828	no
ENSMUSG00000006675.10	ENSMUSG00000006675.10	P4htm	chr9:108578861-108597667	WT_U	WT_D	OK	4.74178	5.33202	0.169253	-0.725399	0.29105	0.549952	no
ENSMUSG00000006676.16	ENSMUSG00000006676.16	Usp19	chr9:108490601-108502337	WT_U	WT_D	OK	26.4746	25.8498	-0.0344558	0.127163	0.84095	0.947348	no
ENSMUSG00000006678.6	ENSMUSG00000006678.6	Pola1	chrX:93304766-93632155	WT_U	WT_D	OK	14.7537	14.6832	-0.00691039	0.0370149	0.9539	0.982312	no
ENSMUSG00000006699.17	ENSMUSG00000006699.17	Cdc42	chr4:137319695-137357720	WT_U	WT_D	OK	261.183	229.042	-0.189449	1.09826	0.11685	0.301529	no
ENSMUSG00000006705.12	ENSMUSG00000006705.12	Pknox1	chr17:31564748-31607684	WT_U	WT_D	OK	8.07963	8.39907	0.0559404	-0.25216	0.69305	0.884678	no
ENSMUSG00000006715.11	ENSMUSG00000006715.11	Gmnn	chr13:24751844-24761923	WT_U	WT_D	OK	51.6089	45.8935	-0.16933	0.861104	0.2213	0.464107	no
ENSMUSG00000006717.6	ENSMUSG00000006717.6	Acot13	chr13:24817947-24831517	WT_U	WT_D	OK	26.5469	22.3595	-0.247655	1.21556	0.08135	0.231651	no
ENSMUSG00000006720.16	ENSMUSG00000006720.16	Zfp184	chr13:21940373-21960779	WT_U	WT_D	OK	4.30013	5.44367	0.340199	-1.49233	0.0286	0.104939	no
ENSMUSG00000006724.12	ENSMUSG00000006724.12	Cyp27b1	chr10:127048249-127053006	WT_U	WT_D	OK	1.04252	1.24915	0.260872	-1.03601	0.1244	0.315096	no
ENSMUSG00000006728.12	ENSMUSG00000006728.12	Cdk4	chr10:127063533-127070261	WT_U	WT_D	OK	487.297	569.216	0.224175	-0.947232	0.17035	0.390345	no
ENSMUSG00000006731.9	ENSMUSG00000006731.9	B4galnt1	chr10:127165155-127172340	WT_U	WT_D	OK	8.36895	13.0487	0.640788	-3.22826	5e-05	0.00046241	yes
ENSMUSG00000006732.14	ENSMUSG00000006732.14	Mettl1	chr10:127031003-127046365	WT_U	WT_D	OK	36.6145	37.0452	0.0168715	-0.0810022	0.9049	0.967099	no
ENSMUSG00000006736.8	ENSMUSG00000006736.8	Tspan31	chr10:127063533-127070261	WT_U	WT_D	OK	72.6215	78.4154	0.11074	-0.285863	0.68775	0.88136	no
ENSMUSG00000006740.13	ENSMUSG00000006740.13	Kif5b	chr18:6201001-6242174	WT_U	WT_D	OK	64.8467	60.5401	-0.0991421	0.466972	0.46405	0.726651	no
ENSMUSG00000006763.12	ENSMUSG00000006763.12	Saal1	chr7:46686107-46710680	WT_U	WT_D	OK	13.2255	10.4709	-0.336937	1.54766	0.0225	0.0869279	no
ENSMUSG00000006764.8	ENSMUSG00000006764.8	Tph2	chr10:115078640-115185022	WT_U	WT_D	OK	5.33244	4.6633	-0.193445	0.946862	0.1732	0.394925	no
ENSMUSG00000006782.16	ENSMUSG00000006782.16	Cnp	chr11:100574903-100704271	WT_U	WT_D	OK	7.43624	5.24766	-0.502899	0.556467	0.409	0.677519	no
ENSMUSG00000006784.14	ENSMUSG00000006784.14	Ttc25	chr11:100545606-100572568	WT_U	WT_D	OK	0.761467	0.785818	0.0454137	-0.134401	0.8386	0.946563	no
ENSMUSG00000006800.13	ENSMUSG00000006800.13	Sulf2	chr2:165992635-166155663	WT_U	WT_D	OK	0.106917	0.18625	0.800749	-0.165854	0.4865	0.745802	no
ENSMUSG00000006818.4	ENSMUSG00000006818.4	Sod2	chr17:13007838-13018119	WT_U	WT_D	OK	21.7167	20.5755	-0.0778774	0.454133	0.5188	0.772162	no
ENSMUSG00000006850.7	ENSMUSG00000006850.7	Tmco6	chr18:36735067-36744557	WT_U	WT_D	OK	5.43516	5.37211	-0.0168337	0.0431599	0.9519	0.981796	no
ENSMUSG00000006906.10	ENSMUSG00000006906.10	Stambp	chr6:83543210-83588123	WT_U	WT_D	OK	13.6934	15.0494	0.136225	-0.60507	0.3689	0.637341	no
ENSMUSG00000006920.14	ENSMUSG00000006920.14	Ezh1	chr11:101191114-101226463	WT_U	WT_D	OK	8.56012	8.09944	-0.0798089	0.270369	0.68565	0.880031	no
ENSMUSG00000006930.15	ENSMUSG00000006930.15	Hap1	chr11:100347326-100356128	WT_U	WT_D	OK	130.811	143.1	0.12954	-0.539667	0.43115	0.697907	no
ENSMUSG00000006931.15	ENSMUSG00000006931.15	P3h4	chr11:100408455-100414836	WT_U	WT_D	OK	12.8076	10.7085	-0.258244	0.930374	0.1072	0.28317	no
ENSMUSG00000006932.16	ENSMUSG00000006932.16	Ctnnb1	chr9:120924454-121277197	WT_U	WT_D	OK	120.228	103.074	-0.222092	1.22658	0.0638	0.193546	no
ENSMUSG00000006941.4	ENSMUSG00000006941.4	Eif1b	chr9:120492605-120495327	WT_U	WT_D	OK	39.3515	34.5823	-0.186385	0.942058	0.18035	0.40577	no
ENSMUSG00000006958.13	ENSMUSG00000006958.13	Chrd	chr16:20725157-20742384	WT_U	WT_D	OK	0.342497	0.279126	-0.295175	0.981028	0.16045	0.375176	no
ENSMUSG00000006998.15	ENSMUSG00000006998.15	Psmd2	chr16:20651651-20663414	WT_U	WT_D	OK	143.142	131.256	-0.125064	0.706399	0.2921	0.551084	no
ENSMUSG00000007021.4	ENSMUSG00000007021.4	Syngr3	chr17:24685091-24689955	WT_U	WT_D	OK	14.0402	14.989	0.0943406	-0.476388	0.4996	0.75644	no
ENSMUSG00000007029.16	ENSMUSG00000007029.16	Vars	chr17:35000986-35016322	WT_U	WT_D	OK	118.892	123.833	0.0587442	-0.219256	0.72055	0.898984	no
ENSMUSG00000007030.8	ENSMUSG00000007030.8	Vwa7	chr17:35016578-35028016	WT_U	WT_D	OK	0.399708	0.540178	0.434488	-1.16553	0.09915	0.267469	no
ENSMUSG00000007035.15	ENSMUSG00000007035.15	Msh5	chr17:35028604-35046745	WT_U	WT_D	OK	1.54962	1.32479	-0.226151	0.685411	0.2957	0.555428	no
ENSMUSG00000007036.15	ENSMUSG00000007036.15	Abhd16a	chr17:35089262-35102987	WT_U	WT_D	OK	22.9568	25.7327	0.164681	-0.546319	0.42995	0.696967	no
ENSMUSG00000007038.5	ENSMUSG00000007038.5	Neu1	chr17:34931252-34935953	WT_U	WT_D	OK	10.2974	12.9902	0.335144	-1.25733	0.06475	0.195664	no
ENSMUSG00000007039.12	ENSMUSG00000007039.12	Ddah2	chr17:35059034-35062095	WT_U	WT_D	OK	92.5086	89.9714	-0.040121	0.211693	0.7635	0.917775	no
ENSMUSG00000007041.9	ENSMUSG00000007041.9	Clic1	chr17:35049965-35058749	WT_U	WT_D	OK	147.424	159.954	0.117686	-0.687143	0.3269	0.591372	no
ENSMUSG00000007050.17	ENSMUSG00000007050.17	Lsm2	chr17:34981861-34985891	WT_U	WT_D	OK	76.2858	72.8414	-0.0666559	0.27426	0.695	0.885554	no
ENSMUSG00000007080.14	ENSMUSG00000007080.14	Pole	chr5:110286305-110337474	WT_U	WT_D	OK	27.8048	24.9157	-0.158279	0.50401	0.47585	0.736496	no
ENSMUSG00000007122.11	ENSMUSG00000007122.11	Casq1	chr1:172209893-172219868	WT_U	WT_D	OK	0.0838221	0.0534315	-0.64964	0.692673	0.2459	0.494986	no
ENSMUSG00000007207.10	ENSMUSG00000007207.10	Stx1a	chr5:135023481-135051100	WT_U	WT_D	OK	23.8193	24.7277	0.053997	-0.211022	0.75935	0.915902	no
ENSMUSG00000007216.6	ENSMUSG00000007216.6	Zfp775	chr6:48589444-48623227	WT_U	WT_D	OK	4.62865	5.47642	0.242642	-0.406141	0.55775	0.801707	no
ENSMUSG00000007338.9	ENSMUSG00000007338.9	Mrpl49	chr19:6046575-6057751	WT_U	WT_D	OK	34.7295	33.4179	-0.0555406	0.247282	0.7205	0.898954	no
ENSMUSG00000007411.15	ENSMUSG00000007411.15	Mark3	chr12:111574509-111656227	WT_U	WT_D	OK	22.3086	22.8673	0.0356861	-0.209097	0.7664	0.919029	no
ENSMUSG00000007415.15	ENSMUSG00000007415.15	Gatad1	chr5:3571565-3680325	WT_U	WT_D	OK	85.3388	80.1285	-0.0908864	0.341637	0.6181	0.840568	no
ENSMUSG00000007440.10	ENSMUSG00000007440.10	Pcdha11	chr18:36930183-37841873	WT_U	WT_D	OK	0.181681	0.115675	-0.65133	0.174711	0.79055	0.929161	no
ENSMUSG00000007458.14	ENSMUSG00000007458.14	M6pr	chr6:122308719-122317680	WT_U	WT_D	OK	65.9623	63.6926	-0.0505159	0.295826	0.67255	0.872787	no
ENSMUSG00000007476.18	ENSMUSG00000007476.18	Lrrc8a	chr2:30236794-30344266	WT_U	WT_D	OK	7.006	7.90778	0.174682	-0.366822	0.60145	0.830242	no
ENSMUSG00000007564.14	ENSMUSG00000007564.14	Ppp2r1a	chr17:20945310-20965916	WT_U	WT_D	OK	85.2519	81.9263	-0.0574053	0.327599	0.62885	0.847173	no
ENSMUSG00000007570.15	ENSMUSG00000007570.15	Fance	chr17:28313529-28326568	WT_U	WT_D	OK	19.2544	20.4202	0.0848088	-0.303287	0.64295	0.855641	no
ENSMUSG00000007589.8	ENSMUSG00000007589.8	Tinf2	chr14:55679082-55681817	WT_U	WT_D	OK	12.5979	12.2515	-0.0402249	0.201312	0.77275	0.921932	no
ENSMUSG00000007591.14	ENSMUSG00000007591.14	Tssk4	chr14:55650181-55652539	WT_U	WT_D	OK	0.100734	0.0979046	-0.0411022	0.0718366	0.9172	0.970903	no
ENSMUSG00000007594.9	ENSMUSG00000007594.9	Hapln4	chr8:70083528-70090862	WT_U	WT_D	OK	1.42162	1.59749	0.168271	-0.770706	0.27105	0.525836	no
ENSMUSG00000007603.8	ENSMUSG00000007603.8	Dus3l	chr17:56764750-56770092	WT_U	WT_D	OK	25.5211	29.6551	0.21659	-1.25818	0.0701	0.207555	no
ENSMUSG00000007610.15	ENSMUSG00000007610.15	Gtpbp3	chr8:71488102-71511769	WT_U	WT_D	OK	12.822	13.2159	0.0436534	-0.160704	0.8194	0.93992	no
ENSMUSG00000007613.15	ENSMUSG00000007613.15	Tgfbr1	chr4:47353221-47414931	WT_U	WT_D	OK	27.2128	23.2338	-0.22806	1.22316	0.0776	0.223693	no
ENSMUSG00000007617.17	ENSMUSG00000007617.17	Homer1	chr13:93303756-93404129	WT_U	WT_D	OK	21.2606	19.9712	-0.0902613	0.475148	0.49225	0.750563	no
ENSMUSG00000007646.13	ENSMUSG00000007646.13	Rad51c	chr11:87376644-87404954	WT_U	WT_D	OK	12.3524	13.3999	0.117431	-0.555244	0.43105	0.697858	no
ENSMUSG00000007656.13	ENSMUSG00000007656.13	Arpp19	chr9:75037613-75060313	WT_U	WT_D	OK	79.3839	77.5619	-0.0334983	0.117952	0.8667	0.95574	no
ENSMUSG00000007659.18	ENSMUSG00000007659.18	Bcl2l1	chr2:152780667-152831728	WT_U	WT_D	OK	13.7817	16.6019	0.268595	-1.03389	0.128	0.321114	no
ENSMUSG00000007670.9	ENSMUSG00000007670.9	Khsrp	chr17:57021057-57031507	WT_U	WT_D	OK	49.5322	49.541	0.00025629	-0.00150152	0.9984	0.999128	no
ENSMUSG00000007682.5	ENSMUSG00000007682.5	Dio2	chr12:90724553-90750693	WT_U	WT_D	OK	0.524027	0.155667	-1.75118	6.51334	5e-05	0.00046241	yes
ENSMUSG00000007721.5	ENSMUSG00000007721.5	Ccdc124	chr8:70868226-70873490	WT_U	WT_D	OK	164.799	132.336	-0.316502	1.85065	0.00905	0.0419352	yes
ENSMUSG00000007739.10	ENSMUSG00000007739.10	Cct4	chr11:22990518-23003780	WT_U	WT_D	OK	324.793	315.723	-0.0408612	0.185234	0.7835	0.926374	no
ENSMUSG00000007777.9	ENSMUSG00000007777.9	0610009B22Rik	chr11:51685385-51688874	WT_U	WT_D	OK	22.3903	27.2767	0.284795	-1.41168	0.04505	0.14893	no
ENSMUSG00000007783.9	ENSMUSG00000007783.9	Cpt1c	chr7:44959372-44974851	WT_U	WT_D	OK	7.97696	7.60004	-0.069832	0.350084	0.61515	0.83905	no
ENSMUSG00000007812.16	ENSMUSG00000007812.16	Zfp655	chr5:145231714-145247302	WT_U	WT_D	OK	19.8034	24.9857	0.335354	-1.51256	0.0169	0.069403	no
ENSMUSG00000007815.13	ENSMUSG00000007815.13	Rhoa	chr9:108302957-108338273	WT_U	WT_D	OK	205.229	182.491	-0.169409	0.570565	0.4102	0.678722	no
ENSMUSG00000007817.14	ENSMUSG00000007817.14	Zmiz1	chr14:25455736-25666743	WT_U	WT_D	OK	20.0436	20.4845	0.031391	-0.0767784	0.88295	0.960618	no
ENSMUSG00000007827.10	ENSMUSG00000007827.10	Ankrd26	chr6:118501307-118562226	WT_U	WT_D	OK	10.1121	9.62574	-0.0711133	0.251882	0.6473	0.858102	no
ENSMUSG00000007833.13	ENSMUSG00000007833.13	Aldh16a1	chr7:45140683-45160064	WT_U	WT_D	OK	10.1125	10.2854	0.0244582	-0.0682383	0.9121	0.969262	no
ENSMUSG00000007836.6	ENSMUSG00000007836.6	Hnrnpa0	chr13:58125878-58128556	WT_U	WT_D	OK	108.229	108.232	3.99895e-05	-0.000244148	0.9997	0.99976	no
ENSMUSG00000007837.10	ENSMUSG00000007837.10	Prrg2	chr7:45053612-45061652	WT_U	WT_D	OK	2.72508	2.59998	-0.0677981	0.289922	0.6802	0.877159	no
ENSMUSG00000007850.16	ENSMUSG00000007850.16	Hnrnph1	chr11:50376989-50386528	WT_U	WT_D	OK	632.798	638.762	0.0135334	-0.0431053	0.92505	0.973504	no
ENSMUSG00000007867.8	ENSMUSG00000007867.8	Ift43	chr12:86082560-86162458	WT_U	WT_D	OK	29.594	33.3002	0.170226	-0.84963	0.2225	0.465512	no
ENSMUSG00000007872.3	ENSMUSG00000007872.3	Id3	chr4:136143496-136145755	WT_U	WT_D	OK	27.6497	6.59328	-2.0682	9.52642	5e-05	0.00046241	yes
ENSMUSG00000007880.16	ENSMUSG00000007880.16	Arid1a	chr4:133679007-133756769	WT_U	WT_D	OK	58.6986	64.5008	0.135991	-0.720736	0.25835	0.510117	no
ENSMUSG00000007888.15	ENSMUSG00000007888.15	Crlf1	chr8:70493157-70504081	WT_U	WT_D	OK	1.19006	1.15914	-0.0379795	0.103669	0.87305	0.957549	no
ENSMUSG00000007891.15	ENSMUSG00000007891.15	Ctsd	chr7:142325836-142388038	WT_U	WT_D	OK	307.515	403.091	0.390449	-1.92363	0.00545	0.0276054	yes
ENSMUSG00000007892.7	ENSMUSG00000007892.7	Rplp1	chr9:61913283-61914538	WT_U	WT_D	OK	2132.87	2191.9	0.0393859	-0.228119	0.74485	0.909659	no
ENSMUSG00000007908.14	ENSMUSG00000007908.14	Hmgcll1	chr9:75775363-76136350	WT_U	WT_D	OK	4.18117	5.22855	0.322504	-1.21111	0.04925	0.159376	no
ENSMUSG00000007944.8	ENSMUSG00000007944.8	Ttc9b	chr7:27653914-27674598	WT_U	WT_D	OK	13.0893	10.9168	-0.261838	0.947693	0.1782	0.40256	no
ENSMUSG00000007946.10	ENSMUSG00000007946.10	Phox2a	chr7:101818312-101838076	WT_U	WT_D	OK	95.6972	121.917	0.349351	-1.51687	0.03155	0.113242	no
ENSMUSG00000007950.8	ENSMUSG00000007950.8	Abhd8	chr8:71456699-71463657	WT_U	WT_D	OK	37.9887	31.096	-0.288841	1.67939	0.017	0.0697052	no
ENSMUSG00000007987.12	ENSMUSG00000007987.12	Ift22	chr5:136908149-136915404	WT_U	WT_D	OK	14.6655	13.3973	-0.130484	0.442183	0.5286	0.779637	no
ENSMUSG00000007989.6	ENSMUSG00000007989.6	Fzd3	chr14:65201025-65262463	WT_U	WT_D	OK	10.1228	11.3552	0.165745	-0.846816	0.21805	0.459803	no
ENSMUSG00000008028.15	ENSMUSG00000008028.15	1700008O03Rik	chr7:44310252-44400187	WT_U	WT_D	OK	0.20561	0.288737	0.489846	-0.285522	0.69735	0.886913	no
ENSMUSG00000008035.12	ENSMUSG00000008035.12	Mid1ip1	chrX:10707175-10719690	WT_U	WT_D	OK	57.7442	73.5708	0.349457	-1.70629	0.0119	0.0523522	no
ENSMUSG00000008036.11	ENSMUSG00000008036.11	Ap2s1	chr7:16738409-16749294	WT_U	WT_D	OK	100.325	89.8756	-0.15868	0.917854	0.18455	0.412092	no
ENSMUSG00000008090.14	ENSMUSG00000008090.14	Fgfrl1	chr5:108692381-108706924	WT_U	WT_D	OK	3.94599	3.07981	-0.357546	0.958068	0.16025	0.374831	no
ENSMUSG00000008129.14	ENSMUSG00000008129.14	4930432K21Rik	chr8:84148024-84172590	WT_U	WT_D	OK	0.075122	0.117562	0.646114	-0.550718	0.3812	0.650138	no
ENSMUSG00000008140.17	ENSMUSG00000008140.17	Emc10	chr7:44489936-44496529	WT_U	WT_D	OK	60.8383	61.5486	0.0167462	-0.0884049	0.8935	0.963476	no
ENSMUSG00000008153.11	ENSMUSG00000008153.11	Clstn3	chr6:124430758-124464794	WT_U	WT_D	OK	3.58411	3.87762	0.113557	-0.398307	0.53125	0.781624	no
ENSMUSG00000008167.14	ENSMUSG00000008167.14	Fbxw9	chr8:85036914-85067124	WT_U	WT_D	OK	5.72564	6.90385	0.269964	-0.29471	0.6413	0.854626	no
ENSMUSG00000008200.14	ENSMUSG00000008200.14	Fnbp4	chr2:90745369-90781021	WT_U	WT_D	OK	36.9238	33.4439	-0.142808	0.538939	0.4261	0.693621	no
ENSMUSG00000008206.15	ENSMUSG00000008206.15	Cers4	chr8:4493025-4531680	WT_U	WT_D	OK	20.0555	15.0234	-0.416787	1.67088	0.0085	0.0398455	yes
ENSMUSG00000008226.14	ENSMUSG00000008226.14	Scrn3	chr2:73271924-73337818	WT_U	WT_D	OK	13.7566	13.9026	0.0152308	-0.0354993	0.95865	0.983877	no
ENSMUSG00000008301.11	ENSMUSG00000008301.11	Phax	chr18:56509686-56587712	WT_U	WT_D	OK	26.1274	26.2255	0.00540671	-0.0248313	0.97255	0.988212	no
ENSMUSG00000008305.18	ENSMUSG00000008305.18	Tle1	chr4:72117141-72200919	WT_U	WT_D	OK	6.46521	4.62376	-0.483631	2.13986	0.00145	0.00904287	yes
ENSMUSG00000008307.11	ENSMUSG00000008307.11	1700109H08Rik	chr5:3571565-3680325	WT_U	WT_D	OK	1.89837	1.63102	-0.218987	0.111045	0.78025	0.925075	no
ENSMUSG00000008318.9	ENSMUSG00000008318.9	Relt	chr7:100845847-100863446	WT_U	WT_D	OK	6.0849	5.531	-0.137693	0.378152	0.57235	0.811666	no
ENSMUSG00000008333.12	ENSMUSG00000008333.12	Snrpb2	chr2:143063038-143072853	WT_U	WT_D	OK	61.7237	56.5355	-0.126667	0.553141	0.4274	0.694778	no
ENSMUSG00000008348.9	ENSMUSG00000008348.9	Ubc	chr5:125385964-125390554	WT_U	WT_D	OK	2.82058	4.03508	0.516605	-2.44967	0.00065	0.00454161	yes
ENSMUSG00000008373.16	ENSMUSG00000008373.16	Prpf31	chr7:3629984-3644887	WT_U	WT_D	OK	83.6259	81.135	-0.0436254	0.197597	0.7752	0.922882	no
ENSMUSG00000008384.8	ENSMUSG00000008384.8	Sertad1	chr7:27486909-27490316	WT_U	WT_D	OK	6.99996	4.95382	-0.498805	2.24481	0.00085	0.0057262	yes
ENSMUSG00000008393.8	ENSMUSG00000008393.8	Carhsp1	chr16:8658586-8672153	WT_U	WT_D	OK	25.2837	24.6711	-0.0353856	0.205867	0.7724	0.921745	no
ENSMUSG00000008398.14	ENSMUSG00000008398.14	Elk3	chr10:93247413-93311135	WT_U	WT_D	OK	18.4049	13.1892	-0.480733	2.30391	0.00095	0.00629407	yes
ENSMUSG00000008429.7	ENSMUSG00000008429.7	Herpud2	chr9:25108129-25151781	WT_U	WT_D	OK	7.1618	8.85305	0.305852	-1.53311	0.0286	0.104939	no
ENSMUSG00000008435.15	ENSMUSG00000008435.15	Rdh13	chr7:4424769-4445649	WT_U	WT_D	OK	14.037	11.7459	-0.257077	0.709146	0.2623	0.515105	no
ENSMUSG00000008450.7	ENSMUSG00000008450.7	Nutf2	chr8:105860633-105880402	WT_U	WT_D	OK	58.7734	50.1293	-0.229509	1.34111	0.0526	0.167592	no
ENSMUSG00000008475.13	ENSMUSG00000008475.13	Arpc5	chr1:152766541-152775597	WT_U	WT_D	OK	113.031	101.614	-0.153619	0.871191	0.21035	0.449382	no
ENSMUSG00000008482.8	ENSMUSG00000008482.8	Rnf151	chr17:24715838-24718057	WT_U	WT_D	OK	0.148637	0.0539863	-1.46113	1.9719	0.01405	0.0598503	no
ENSMUSG00000008489.18	ENSMUSG00000008489.18	Elavl2	chr4:91250762-91400785	WT_U	WT_D	OK	59.9777	48.5904	-0.303755	1.52856	0.01775	0.072169	no
ENSMUSG00000008496.18	ENSMUSG00000008496.18	Pou2f2	chr7:25087343-25159922	WT_U	WT_D	OK	9.53277	8.29349	-0.200916	0.402325	0.5517	0.797093	no
ENSMUSG00000008540.11	ENSMUSG00000008540.11	Mgst1	chr6:138140315-138156755	WT_U	WT_D	OK	0.186317	0.223579	0.263025	-0.292438	0.61515	0.83905	no
ENSMUSG00000008575.17	ENSMUSG00000008575.17	Nfib	chr4:82290172-82705750	WT_U	WT_D	OK	23.4784	20.9188	-0.166534	0.833454	0.216	0.457028	no
ENSMUSG00000008590.4	ENSMUSG00000008590.4	Htr3b	chr9:48935007-48964990	WT_U	WT_D	OK	0.376921	0.0504267	-2.902	5.80612	5e-05	0.00046241	yes
ENSMUSG00000008601.12	ENSMUSG00000008601.12	Rab25	chr3:88542028-88548300	WT_U	WT_D	OK	0.119508	0.114615	-0.0603113	0.064703	0.9089	0.968388	no
ENSMUSG00000008604.11	ENSMUSG00000008604.11	Ubqln4	chr3:88553757-88569725	WT_U	WT_D	OK	33.3103	32.6664	-0.0281609	0.142069	0.82295	0.940864	no
ENSMUSG00000008658.15	ENSMUSG00000008658.15	Rbfox1	chr16:6809221-7412479	WT_U	WT_D	OK	3.28159	3.4593	0.0760851	-0.293201	0.6745	0.87379	no
ENSMUSG00000008668.14	ENSMUSG00000008668.14	Rps18	chr17:33951998-33966984	WT_U	WT_D	OK	543.512	562.348	0.0491513	-0.260663	0.7039	0.890664	no
ENSMUSG00000008682.13	ENSMUSG00000008682.13	Rpl10	chrX:74270811-74273135	WT_U	WT_D	OK	1460.59	1623.22	0.152307	-0.86498	0.21805	0.459803	no
ENSMUSG00000008683.16	ENSMUSG00000008683.16	Rps15a	chr7:118104371-118116188	WT_U	WT_D	OK	1099.51	1091.32	-0.0107865	0.0325017	0.96115	0.984597	no
ENSMUSG00000008690.15	ENSMUSG00000008690.15	Ncaph2	chr15:89355718-89377039	WT_U	WT_D	OK	90.8234	85.0434	-0.0948648	0.422721	0.47845	0.738694	no
ENSMUSG00000008730.17	ENSMUSG00000008730.17	Hipk1	chr3:103739365-103791563	WT_U	WT_D	OK	27.4371	28.7719	0.0685325	-0.356879	0.60725	0.834271	no
ENSMUSG00000008734.8	ENSMUSG00000008734.8	Gprc5b	chr7:118740225-118995211	WT_U	WT_D	OK	0.657505	0.477128	-0.462626	0.272496	0.69585	0.886036	no
ENSMUSG00000008763.16	ENSMUSG00000008763.16	Man1a2	chr3:100562207-100685503	WT_U	WT_D	OK	37.1818	33.9941	-0.129312	0.272489	0.6726	0.872795	no
ENSMUSG00000008822.15	ENSMUSG00000008822.15	Acyp1	chr12:85272397-85288438	WT_U	WT_D	OK	36.9962	39.2759	0.0862672	-0.417582	0.5543	0.79919	no
ENSMUSG00000008855.17	ENSMUSG00000008855.17	Hdac5	chr11:102194431-102230166	WT_U	WT_D	OK	26.4475	18.5827	-0.509171	1.45914	0.03115	0.112091	no
ENSMUSG00000008859.7	ENSMUSG00000008859.7	Rala	chr13:17880574-17944239	WT_U	WT_D	OK	28.4446	30.5114	0.101194	-0.589825	0.4032	0.672123	no
ENSMUSG00000008892.11	ENSMUSG00000008892.11	Vdac3	chr8:22577074-22593813	WT_U	WT_D	OK	266.827	299.013	0.164304	-0.955747	0.1737	0.395632	no
ENSMUSG00000008932.9	ENSMUSG00000008932.9	Slc1a7	chr4:107968331-108013532	WT_U	WT_D	OK	0.192033	0.325782	0.762553	-2.36238	0.00095	0.00629407	yes
ENSMUSG00000008958.14	ENSMUSG00000008958.14	Vps72	chr3:95111021-95123051	WT_U	WT_D	OK	52.7289	59.1479	0.165733	-0.639924	0.35515	0.622418	no
ENSMUSG00000008976.16	ENSMUSG00000008976.16	Gabpa	chr16:84827865-84863779	WT_U	WT_D	OK	46.3511	42.9636	-0.109489	0.319958	0.6376	0.852268	no
ENSMUSG00000009013.5	ENSMUSG00000009013.5	Dynll1	chr5:115297109-115300999	WT_U	WT_D	OK	356.409	326.753	-0.125333	0.59253	0.3954	0.664393	no
ENSMUSG00000009030.14	ENSMUSG00000009030.14	Pdcl	chr2:37350073-37359332	WT_U	WT_D	OK	28.8564	27.0317	-0.0942391	0.3465	0.61795	0.840524	no
ENSMUSG00000009035.13	ENSMUSG00000009035.13	Tmem184b	chr15:79360683-79403303	WT_U	WT_D	OK	21.8328	21.3744	-0.0306132	0.178243	0.8001	0.93276	no
ENSMUSG00000009073.16	ENSMUSG00000009073.16	Nf2	chr11:4765844-4849536	WT_U	WT_D	OK	44.7867	41.6441	-0.104958	0.478696	0.44735	0.712391	no
ENSMUSG00000009076.10	ENSMUSG00000009076.10	Zmat5	chr11:4704677-4746778	WT_U	WT_D	OK	16.9741	16.9887	0.00124038	-0.00593724	0.99315	0.996492	no
ENSMUSG00000009079.16	ENSMUSG00000009079.16	Ewsr1	chr11:5069688-5106093	WT_U	WT_D	OK	562.573	481.077	-0.225772	0.326906	0.6156	0.83939	no
ENSMUSG00000009090.17	ENSMUSG00000009090.17	Ap1b1	chr11:4986823-5042791	WT_U	WT_D	OK	24.075	24.1647	0.00536529	-0.0178134	0.97475	0.988863	no
ENSMUSG00000009097.9	ENSMUSG00000009097.9	Tbx1	chr16:18581712-18586969	WT_U	WT_D	OK	2.37015	3.52312	0.571875	-2.58443	0.00045	0.00330168	yes
ENSMUSG00000009108.15	ENSMUSG00000009108.15	Gnat2	chr3:108092788-108101432	WT_U	WT_D	OK	6.17002	7.5928	0.299357	-1.19136	0.08825	0.245631	no
ENSMUSG00000009112.4	ENSMUSG00000009112.4	Bcl2l13	chr6:120836211-120916853	WT_U	WT_D	OK	28.2017	29.5749	0.0685912	-0.0970359	0.88825	0.962008	no
ENSMUSG00000009115.5	ENSMUSG00000009115.5	Spatc1l	chr10:76562271-76570532	WT_U	WT_D	OK	0.126938	0.0872185	-0.541418	0.801679	0.2478	0.497482	no
ENSMUSG00000009145.6	ENSMUSG00000009145.6	Dqx1	chr6:83057843-83067318	WT_U	WT_D	OK	0.773429	0.791066	0.0325292	-0.107972	0.87555	0.958521	no
ENSMUSG00000009207.15	ENSMUSG00000009207.15	Lnp	chr2:74520290-74584544	WT_U	WT_D	OK	27.3122	28.0416	0.0380231	-0.178921	0.788	0.928179	no
ENSMUSG00000009216.7	ENSMUSG00000009216.7	Fam163b	chr2:27110379-27142491	WT_U	WT_D	OK	0.13979	0.169414	0.277292	-0.743417	0.29915	0.559726	no
ENSMUSG00000009291.12	ENSMUSG00000009291.12	Pttg1ip	chr10:77581719-77598732	WT_U	WT_D	OK	33.7101	35.436	0.0720349	-0.297753	0.6576	0.864289	no
ENSMUSG00000009292.17	ENSMUSG00000009292.17	Trpm2	chr10:77907721-77970563	WT_U	WT_D	OK	9.44817	10.2864	0.122631	-0.548981	0.42445	0.692116	no
ENSMUSG00000009293.17	ENSMUSG00000009293.17	Ube2g2	chr10:77606096-77645993	WT_U	WT_D	OK	65.8916	64.027	-0.0414141	0.100927	0.87865	0.959485	no
ENSMUSG00000009378.3	ENSMUSG00000009378.3	Slc16a12	chr19:34668402-34747289	WT_U	WT_D	OK	2.47019	1.72624	-0.516989	2.45696	0.00055	0.00392894	yes
ENSMUSG00000009394.13	ENSMUSG00000009394.13	Syn2	chr6:115134901-115282006	WT_U	WT_D	OK	39.5852	24.0289	-0.720191	4.09403	5e-05	0.00046241	yes
ENSMUSG00000009406.13	ENSMUSG00000009406.13	Elk1	chrX:20933394-20986737	WT_U	WT_D	OK	6.2787	6.53389	0.0574763	-0.237588	0.73065	0.903707	no
ENSMUSG00000009418.15	ENSMUSG00000009418.15	Nav1	chr1:135434579-135688105	WT_U	WT_D	OK	27.2285	27.068	-0.00852921	0.0310735	0.9621	0.984966	no
ENSMUSG00000009470.16	ENSMUSG00000009470.16	Tnpo1	chr13:98839018-98926384	WT_U	WT_D	OK	94.472	92.8372	-0.0251838	0.113323	0.8595	0.953588	no
ENSMUSG00000009487.9	ENSMUSG00000009487.9	Otog	chr7:46240986-46311434	WT_U	WT_D	OK	0.00693951	0.135117	4.28323	-7.34417	5e-05	0.00046241	yes
ENSMUSG00000009535.13	ENSMUSG00000009535.13	Rnmt	chr18:68300354-68324852	WT_U	WT_D	OK	38.1591	37.2893	-0.0332654	0.147821	0.82955	0.943429	no
ENSMUSG00000009549.14	ENSMUSG00000009549.14	Srp14	chr2:118475849-118479711	WT_U	WT_D	OK	151.337	134.221	-0.173154	1.01088	0.15	0.35836	no
ENSMUSG00000009551.2	ENSMUSG00000009551.2	6330409D20Rik	chr2:32721054-32755512	WT_U	WT_D	OK	0.551818	0.828842	0.586905	-0.519638	0.43245	0.699063	no
ENSMUSG00000009555.16	ENSMUSG00000009555.16	Cdk9	chr2:32705783-32713076	WT_U	WT_D	OK	41.7915	37.9471	-0.13922	0.560284	0.3995	0.668569	no
ENSMUSG00000009563.16	ENSMUSG00000009563.16	Tor2a	chr2:32757025-32775633	WT_U	WT_D	OK	22.4827	23.4749	0.0623037	-0.211487	0.74995	0.91208	no
ENSMUSG00000009566.12	ENSMUSG00000009566.12	Fpgs	chr2:32646594-32704145	WT_U	WT_D	OK	23.7127	25.6098	0.111036	-0.465376	0.4929	0.751005	no
ENSMUSG00000009569.14	ENSMUSG00000009569.14	Mkl2	chr16:13256480-13417529	WT_U	WT_D	OK	7.47073	6.11156	-0.289709	1.04665	0.06915	0.205435	no
ENSMUSG00000009575.14	ENSMUSG00000009575.14	Cbx5	chr15:103191543-103239816	WT_U	WT_D	OK	141.796	126.079	-0.169489	0.617081	0.36125	0.62907	no
ENSMUSG00000009585.17	ENSMUSG00000009585.17	Apobec3	chr15:79891658-79971119	WT_U	WT_D	OK	17.1175	16.6525	-0.0397332	0.077043	0.906	0.967361	no
ENSMUSG00000009596.9	ENSMUSG00000009596.9	Taf7l	chrX:134460117-134476490	WT_U	WT_D	OK	0.100878	1.57541	3.96504	-6.32967	5e-05	0.00046241	yes
ENSMUSG00000009614.16	ENSMUSG00000009614.16	Sardh	chr2:27188392-27248337	WT_U	WT_D	OK	18.1492	15.9797	-0.183666	0.60031	0.36725	0.635454	no
ENSMUSG00000009621.18	ENSMUSG00000009621.18	Vav2	chr2:27262103-27427033	WT_U	WT_D	OK	16.4419	16.1588	-0.025057	0.107774	0.85735	0.952923	no
ENSMUSG00000009628.14	ENSMUSG00000009628.14	Tex15	chr8:33516737-33585582	WT_U	WT_D	OK	0.17803	0.192356	0.111658	-0.269236	0.6763	0.874866	no
ENSMUSG00000009630.9	ENSMUSG00000009630.9	Ppp2cb	chr8:33599620-33641976	WT_U	WT_D	OK	98.9149	94.8221	-0.0609645	0.328559	0.63675	0.8517	no
ENSMUSG00000009633.3	ENSMUSG00000009633.3	G0s2	chr1:193203037-193343878	WT_U	WT_D	OK	0.446962	3.34443	2.90354	-7.96867	5e-05	0.00046241	yes
ENSMUSG00000009640.11	ENSMUSG00000009640.11	Dmap1	chr4:117674680-117682273	WT_U	WT_D	OK	11.8905	13.5524	0.188739	-0.888918	0.1889	0.418596	no
ENSMUSG00000009647.13	ENSMUSG00000009647.13	Mcu	chr10:59446983-59616692	WT_U	WT_D	OK	11.5539	11.1833	-0.0470339	0.223466	0.73995	0.907791	no
ENSMUSG00000009654.4	ENSMUSG00000009654.4	Oit3	chr10:59422957-59441778	WT_U	WT_D	OK	0.488208	0.482838	-0.0159567	0.0230122	0.97495	0.988916	no
ENSMUSG00000009681.9	ENSMUSG00000009681.9	Bcr	chr10:75060895-75184923	WT_U	WT_D	OK	18.8376	19.6746	0.0627191	-0.367072	0.6042	0.832215	no
ENSMUSG00000009687.14	ENSMUSG00000009687.14	Fxyd5	chr7:31032721-31042481	WT_U	WT_D	OK	29.0746	18.6335	-0.641861	2.86751	5e-05	0.00046241	yes
ENSMUSG00000009731.4	ENSMUSG00000009731.4	Kcnd1	chrX:7822288-7838280	WT_U	WT_D	OK	0.490146	0.557744	0.186392	-0.726734	0.2767	0.532457	no
ENSMUSG00000009733.8	ENSMUSG00000009733.8	Tfcp2	chr15:100502798-100552008	WT_U	WT_D	OK	6.45166	6.84366	0.0850977	-0.42671	0.5322	0.782378	no
ENSMUSG00000009739.16	ENSMUSG00000009739.16	Pou6f1	chr15:100575317-100599984	WT_U	WT_D	OK	4.51674	5.6516	0.323377	-1.00496	0.1384	0.338856	no
ENSMUSG00000009741.14	ENSMUSG00000009741.14	Ubp1	chr9:113930933-114046191	WT_U	WT_D	OK	37.0985	39.1951	0.0793125	-0.438183	0.53035	0.781034	no
ENSMUSG00000009828.15	ENSMUSG00000009828.15	Ick	chr9:78109191-78172107	WT_U	WT_D	OK	8.81735	10.181	0.207462	-0.950232	0.15585	0.367992	no
ENSMUSG00000009863.14	ENSMUSG00000009863.14	Sdhb	chr4:140961202-140979193	WT_U	WT_D	OK	304.235	299.465	-0.0227987	0.133314	0.8526	0.951075	no
ENSMUSG00000009876.13	ENSMUSG00000009876.13	Cox4i2	chr2:152754172-152765037	WT_U	WT_D	OK	6.14946	0.564946	-3.44427	9.90783	5e-05	0.00046241	yes
ENSMUSG00000009894.15	ENSMUSG00000009894.15	Snap47	chr11:59407133-59458567	WT_U	WT_D	OK	34.7653	40.3633	0.215396	-0.890801	0.1915	0.422461	no
ENSMUSG00000009905.5	ENSMUSG00000009905.5	Kdsr	chr1:106720458-106759727	WT_U	WT_D	OK	4.18451	4.88768	0.224091	-0.866637	0.19795	0.432058	no
ENSMUSG00000009907.17	ENSMUSG00000009907.17	Vps4b	chr1:106764070-106796728	WT_U	WT_D	OK	35.0748	38.8017	0.145685	-0.508611	0.45005	0.71485	no
ENSMUSG00000009927.8	ENSMUSG00000009927.8	Rps25	chr9:44407713-44418003	WT_U	WT_D	OK	1017.17	945.517	-0.105386	0.602724	0.3892	0.658181	no
ENSMUSG00000009995.17	ENSMUSG00000009995.17	Taz	chrX:74273216-74290151	WT_U	WT_D	OK	12.1587	14.7915	0.282779	-0.952638	0.1262	0.318087	no
ENSMUSG00000010025.18	ENSMUSG00000010025.18	Aldh3a2	chr11:61223416-61267464	WT_U	WT_D	OK	14.4493	14.8538	0.0398325	-0.186872	0.7783	0.92425	no
ENSMUSG00000010044.12	ENSMUSG00000010044.12	Zmynd10	chr9:107547297-107551319	WT_U	WT_D	OK	0.193577	0.230693	0.253067	-0.29904	0.6444	0.856354	no
ENSMUSG00000010045.2	ENSMUSG00000010045.2	Tmem115	chr9:107533944-107538673	WT_U	WT_D	OK	5.70081	6.36405	0.158778	-0.777685	0.2645	0.517983	no
ENSMUSG00000010047.12	ENSMUSG00000010047.12	Hyal2	chr9:107551554-107572779	WT_U	WT_D	OK	16.722	17.608	0.0744836	-0.186869	0.78405	0.926543	no
ENSMUSG00000010048.10	ENSMUSG00000010048.10	Ifrd2	chr9:107587641-107593385	WT_U	WT_D	OK	27.5319	25.9605	-0.084786	0.332325	0.62735	0.846256	no
ENSMUSG00000010051.15	ENSMUSG00000010051.15	Hyal1	chr9:107575819-107587425	WT_U	WT_D	OK	0.583552	0.4561	-0.355511	0.613577	0.3689	0.637341	no
ENSMUSG00000010054.4	ENSMUSG00000010054.4	Tusc2	chr9:107551554-107572779	WT_U	WT_D	OK	8.02769	9.15148	0.18902	-0.491863	0.46695	0.729118	no
ENSMUSG00000010057.8	ENSMUSG00000010057.8	Nprl2	chr9:107542225-107545706	WT_U	WT_D	OK	6.25957	6.45137	0.043542	-0.18446	0.784	0.926506	no
ENSMUSG00000010064.15	ENSMUSG00000010064.15	Slc38a3	chr9:107650633-107669530	WT_U	WT_D	OK	0.516268	0.380705	-0.439447	0.967244	0.1221	0.311087	no
ENSMUSG00000010066.15	ENSMUSG00000010066.15	Cacna2d2	chr9:107399611-107529343	WT_U	WT_D	OK	0.0975994	0.0727368	-0.424187	0.48074	0.3926	0.661597	no
ENSMUSG00000010067.13	ENSMUSG00000010067.13	Rassf1	chr9:107551554-107572779	WT_U	WT_D	OK	17.4375	15.7456	-0.147244	0.531993	0.4278	0.695169	no
ENSMUSG00000010086.17	ENSMUSG00000010086.17	Rnf112	chr11:61448441-61454131	WT_U	WT_D	OK	1.31235	1.61872	0.302701	-1.17999	0.0731	0.213847	no
ENSMUSG00000010095.13	ENSMUSG00000010095.13	Slc3a2	chr19:8706881-8723369	WT_U	WT_D	OK	391.462	433.396	0.146814	-0.777367	0.23645	0.483236	no
ENSMUSG00000010097.13	ENSMUSG00000010097.13	Nxf1	chr19:8757072-8772475	WT_U	WT_D	OK	74.152	67.5252	-0.13506	0.6711	0.3126	0.575087	no
ENSMUSG00000010110.17	ENSMUSG00000010110.17	Stx5a	chr19:8741412-8756069	WT_U	WT_D	OK	16.2458	20.5937	0.342136	-1.36397	0.04755	0.155168	no
ENSMUSG00000010122.14	ENSMUSG00000010122.14	Slc47a1	chr11:61343400-61378345	WT_U	WT_D	OK	1.79364	1.49585	-0.261925	0.996652	0.14205	0.345077	no
ENSMUSG00000010142.12	ENSMUSG00000010142.12	Tnfrsf13b	chr11:61126754-61149372	WT_U	WT_D	OK	2.41136	1.58989	-0.60092	1.64671	0.0163	0.0674366	no
ENSMUSG00000010205.10	ENSMUSG00000010205.10	Raver1	chr9:21074167-21128393	WT_U	WT_D	OK	37.3101	36.9667	-0.01334	0.0733478	0.9159	0.97043	no
ENSMUSG00000010277.7	ENSMUSG00000010277.7	2610507B11Rik	chr11:78261751-78290623	WT_U	WT_D	OK	32.9106	31.1796	-0.0779499	0.321626	0.53835	0.787008	no
ENSMUSG00000010290.7	ENSMUSG00000010290.7	AI597479	chr1:43098709-43115947	WT_U	WT_D	OK	22.4081	23.1792	0.0488104	-0.28451	0.6829	0.878606	no
ENSMUSG00000010307.5	ENSMUSG00000010307.5	Tmem86a	chr7:47050639-47054776	WT_U	WT_D	OK	1.60002	1.45836	-0.133743	0.555932	0.4236	0.691338	no
ENSMUSG00000010311.15	ENSMUSG00000010311.15	Optc	chr1:133897198-133921414	WT_U	WT_D	OK	2.17355	7.48742	1.78442	-7.87822	5e-05	0.00046241	yes
ENSMUSG00000010358.13	ENSMUSG00000010358.13	Ifi35	chr11:101448406-101458698	WT_U	WT_D	OK	12.911	13.9008	0.106567	-0.522498	0.4547	0.719045	no
ENSMUSG00000010362.9	ENSMUSG00000010362.9	Rdm1	chr11:101627194-101636100	WT_U	WT_D	OK	6.58938	4.03116	-0.708948	2.91113	5e-05	0.00046241	yes
ENSMUSG00000010376.14	ENSMUSG00000010376.14	Nedd8	chr14:55662264-55671906	WT_U	WT_D	OK	110.641	89.7008	-0.302693	1.54466	0.02535	0.0954722	no
ENSMUSG00000010392.8	ENSMUSG00000010392.8	Gosr1	chr11:76726601-76763579	WT_U	WT_D	OK	25.6867	29.3913	0.194368	-0.431659	0.5262	0.777734	no
ENSMUSG00000010406.11	ENSMUSG00000010406.11	Mrpl52	chr14:54426908-54429756	WT_U	WT_D	OK	121.683	128.583	0.0795723	-0.401428	0.56355	0.805928	no
ENSMUSG00000010453.12	ENSMUSG00000010453.12	Kansl3	chr1:36335729-36369181	WT_U	WT_D	OK	28.711	30.9396	0.107851	-0.533207	0.3989	0.667956	no
ENSMUSG00000010476.13	ENSMUSG00000010476.13	Ebf3	chr7:137193672-137314445	WT_U	WT_D	OK	17.7556	16.1839	-0.133715	0.776614	0.27085	0.525631	no
ENSMUSG00000010505.15	ENSMUSG00000010505.15	Myt1	chr2:181763331-181827797	WT_U	WT_D	OK	21.5016	35.7275	0.732591	-2.5117	0.00015	0.00125317	yes
ENSMUSG00000010517.7	ENSMUSG00000010517.7	Faf1	chr4:109676587-109963960	WT_U	WT_D	OK	17.8578	20.3552	0.188843	-0.878407	0.2095	0.448245	no
ENSMUSG00000010529.5	ENSMUSG00000010529.5	Gm266	chr12:111484610-111485823	WT_U	WT_D	OK	0.0695929	0.0895358	0.363525	-0.488342	0.47885	0.739038	no
ENSMUSG00000010538.14	ENSMUSG00000010538.14	Tsacc	chr3:88242873-88296999	WT_U	WT_D	OK	2.56077	2.91385	0.186349	-0.641768	0.36615	0.634427	no
ENSMUSG00000010554.14	ENSMUSG00000010554.14	Mettl16	chr11:74770829-74828525	WT_U	WT_D	OK	22.6326	20.4037	-0.149572	0.561153	0.3804	0.649205	no
ENSMUSG00000010592.8	ENSMUSG00000010592.8	Dazl	chr17:50279393-50293599	WT_U	WT_D	OK	0.866023	0.960124	0.148815	-0.622038	0.3785	0.647407	no
ENSMUSG00000010601.13	ENSMUSG00000010601.13	Apol7a	chr15:77388220-77399110	WT_U	WT_D	OK	0.527895	0.219336	-1.26711	2.53563	5e-05	0.00046241	yes
ENSMUSG00000010607.8	ENSMUSG00000010607.8	Pigyl	chr9:22156845-22158358	WT_U	WT_D	OK	11.1245	12.6491	0.185294	-0.859054	0.2215	0.46437	no
ENSMUSG00000010608.15	ENSMUSG00000010608.15	Rbm25	chr12:83631235-83683123	WT_U	WT_D	OK	133.371	122.315	-0.124844	0.525823	0.3952	0.664247	no
ENSMUSG00000010609.15	ENSMUSG00000010609.15	Psen2	chr1:180227003-180274963	WT_U	WT_D	OK	4.46987	6.01212	0.427641	-1.9283	0.0041	0.0217665	yes
ENSMUSG00000010651.4	ENSMUSG00000010651.4	Acaa1b	chr9:119102477-119157093	WT_U	WT_D	OK	0.255368	0.388337	0.604731	-1.62028	0.0186	0.0748204	no
ENSMUSG00000010660.2	ENSMUSG00000010660.2	Plcd1	chr9:119071526-119093496	WT_U	WT_D	OK	0.273595	0.220461	-0.311518	0.934912	0.18485	0.412597	no
ENSMUSG00000010663.4	ENSMUSG00000010663.4	Fads1	chr19:10182887-10196870	WT_U	WT_D	OK	43.7846	55.7932	0.349666	-2.04785	0.0031	0.017209	yes
ENSMUSG00000010721.15	ENSMUSG00000010721.15	Lmbr1	chr5:29229801-29378390	WT_U	WT_D	OK	5.9949	6.35254	0.0835979	-0.360065	0.5955	0.826527	no
ENSMUSG00000010751.14	ENSMUSG00000010751.14	Tnfrsf22	chr7:143634805-143649661	WT_U	WT_D	OK	6.83596	5.47731	-0.319676	0.953359	0.1681	0.386817	no
ENSMUSG00000010755.16	ENSMUSG00000010755.16	Cars	chr7:143557229-143600090	WT_U	WT_D	OK	80.3342	79.2577	-0.0194632	0.0960404	0.87725	0.959096	no
ENSMUSG00000010760.4	ENSMUSG00000010760.4	Phlda2	chr7:143501544-143502541	WT_U	WT_D	OK	0.832857	1.15232	0.468401	-1.36037	0.0563	0.176336	no
ENSMUSG00000010796.11	ENSMUSG00000010796.11	Asz1	chr6:18050963-18109061	WT_U	WT_D	OK	95.5011	102.419	0.100894	-0.522324	0.4549	0.71927	no
ENSMUSG00000010797.6	ENSMUSG00000010797.6	Wnt2	chr6:17988939-18030585	WT_U	WT_D	OK	0.183543	0.635201	1.7911	-5.34753	5e-05	0.00046241	yes
ENSMUSG00000010825.17	ENSMUSG00000010825.17	Grid2ip	chr5:143357337-143403748	WT_U	WT_D	OK	3.76553	3.48236	-0.112788	0.348179	0.6072	0.834226	no
ENSMUSG00000010830.7	ENSMUSG00000010830.7	Kdelr3	chr15:79516407-79546741	WT_U	WT_D	OK	3.6639	1.95245	-0.908095	0.712797	0.28835	0.546654	no
ENSMUSG00000010911.12	ENSMUSG00000010911.12	Apip	chr2:103073674-103092644	WT_U	WT_D	OK	17.9487	17.268	-0.0557784	0.267213	0.6973	0.886883	no
ENSMUSG00000010914.10	ENSMUSG00000010914.10	Pdhx	chr2:103021074-103073513	WT_U	WT_D	OK	24.892	25.239	0.0199726	-0.076557	0.91635	0.970567	no
ENSMUSG00000010936.10	ENSMUSG00000010936.10	Vac14	chr8:110618637-110720396	WT_U	WT_D	OK	31.2713	30.4251	-0.0395772	0.231066	0.74245	0.908722	no
ENSMUSG00000011008.13	ENSMUSG00000011008.13	Mcoln2	chr3:146149832-146195513	WT_U	WT_D	OK	0.166405	0.166567	0.00140382	-0.00194125	0.99795	0.998917	no
ENSMUSG00000011096.16	ENSMUSG00000011096.16	Akt1s1	chr7:44840900-44855421	WT_U	WT_D	OK	57.3353	68.3007	0.252477	-0.992366	0.1253	0.316552	no
ENSMUSG00000011114.17	ENSMUSG00000011114.17	Tbrg1	chr9:37649181-37657312	WT_U	WT_D	OK	91.3037	104.314	0.192188	-1.11949	0.10315	0.275214	no
ENSMUSG00000011148.13	ENSMUSG00000011148.13	Adssl1	chr12:112620044-112641354	WT_U	WT_D	OK	0.296153	0.710164	1.26181	-3.88029	5e-05	0.00046241	yes
ENSMUSG00000011158.7	ENSMUSG00000011158.7	Brf1	chr12:112959861-113001926	WT_U	WT_D	OK	11.2541	11.3268	0.00928965	-0.0470097	0.94565	0.979879	no
ENSMUSG00000011171.11	ENSMUSG00000011171.11	Vipr2	chr12:116077725-116146261	WT_U	WT_D	OK	0.274501	0.400047	0.543358	-0.665882	0.3007	0.561599	no
ENSMUSG00000011179.7	ENSMUSG00000011179.7	Odc1	chr12:17544872-17551502	WT_U	WT_D	OK	286.567	259.65	-0.142304	0.823958	0.23805	0.48512	no
ENSMUSG00000011254.16	ENSMUSG00000011254.16	Thg1l	chr11:45946842-45955494	WT_U	WT_D	OK	33.0263	33.0435	0.000751156	-0.00304407	0.9966	0.998194	no
ENSMUSG00000011256.16	ENSMUSG00000011256.16	Adam19	chr11:46055991-46147343	WT_U	WT_D	OK	22.5076	21.2605	-0.0822367	0.40614	0.50595	0.761875	no
ENSMUSG00000011257.19	ENSMUSG00000011257.19	Pabpc4	chr4:123262350-123298925	WT_U	WT_D	OK	62.268	54.5464	-0.191007	1.10913	0.1149	0.297863	no
ENSMUSG00000011263.15	ENSMUSG00000011263.15	Exoc3l2	chr7:19489055-19496760	WT_U	WT_D	OK	0.30385	0.200624	-0.598865	1.67207	0.01765	0.0718528	no
ENSMUSG00000011267.7	ENSMUSG00000011267.7	Zfp296	chr7:19577286-19580656	WT_U	WT_D	OK	1.26272	1.2363	-0.0305059	0.118504	0.86695	0.955768	no
ENSMUSG00000011306.6	ENSMUSG00000011306.6	Sugp1	chr8:70042812-70071953	WT_U	WT_D	OK	19.7317	20.2663	0.0385675	-0.197091	0.7818	0.925708	no
ENSMUSG00000011427.15	ENSMUSG00000011427.15	Zfp790	chr7:29816071-29832042	WT_U	WT_D	OK	3.55652	3.85731	0.117129	-0.585349	0.40585	0.674375	no
ENSMUSG00000011589.8	ENSMUSG00000011589.8	Fsd1	chr17:55986510-55996881	WT_U	WT_D	OK	14.7581	17.5945	0.253618	-1.2801	0.06365	0.193237	no
ENSMUSG00000011632.7	ENSMUSG00000011632.7	Pinlyp	chr7:24541657-24546118	WT_U	WT_D	OK	0.0690004	0.0882195	0.354493	-0.387581	0.58255	0.81798	no
ENSMUSG00000011658.14	ENSMUSG00000011658.14	Fuz	chr7:44896078-44929490	WT_U	WT_D	OK	2.24757	2.05086	-0.132137	0.133521	0.84965	0.950317	no
ENSMUSG00000011751.16	ENSMUSG00000011751.16	Sptbn4	chr7:27342132-27447686	WT_U	WT_D	OK	4.58354	5.31128	0.212597	-0.67753	0.251	0.501384	no
ENSMUSG00000011752.6	ENSMUSG00000011752.6	Pgam1	chr19:41911870-41918664	WT_U	WT_D	OK	69.0036	40.1985	-0.77953	4.54542	5e-05	0.00046241	yes
ENSMUSG00000011831.16	ENSMUSG00000011831.16	Evi5	chr5:107744794-107875107	WT_U	WT_D	OK	35.13	36.4638	0.0537613	-0.213928	0.735	0.905783	no
ENSMUSG00000011832.15	ENSMUSG00000011832.15	Evi5l	chr8:4162521-4217459	WT_U	WT_D	OK	8.85725	12.3864	0.483826	-1.76214	0.0061	0.0302974	yes
ENSMUSG00000011837.3	ENSMUSG00000011837.3	Snapc2	chr8:4253101-4256219	WT_U	WT_D	OK	29.0117	29.7251	0.0350468	-0.178742	0.7946	0.930466	no
ENSMUSG00000011877.13	ENSMUSG00000011877.13	Git1	chr11:77493561-77507786	WT_U	WT_D	OK	40.1074	40.0119	-0.00343931	0.0185093	0.9784	0.99022	no
ENSMUSG00000011884.13	ENSMUSG00000011884.13	Gltp	chr5:114669397-114690984	WT_U	WT_D	OK	14.4202	13.4191	-0.103803	0.522033	0.4438	0.70915	no
ENSMUSG00000011958.17	ENSMUSG00000011958.17	Bnip2	chr9:69988399-70008317	WT_U	WT_D	OK	50.5499	48.5115	-0.0593814	0.27343	0.69395	0.885139	no
ENSMUSG00000011960.12	ENSMUSG00000011960.12	Ccnt1	chr15:98538688-98570923	WT_U	WT_D	OK	28.9383	27.4964	-0.0737374	0.316204	0.62605	0.84539	no
ENSMUSG00000012017.3	ENSMUSG00000012017.3	Scarf2	chr16:17797281-17808287	WT_U	WT_D	OK	5.24754	3.35462	-0.645492	3.16874	5e-05	0.00046241	yes
ENSMUSG00000012076.7	ENSMUSG00000012076.7	Brms1l	chr12:55836365-55869735	WT_U	WT_D	OK	15.2114	13.999	-0.119829	0.609893	0.3775	0.646392	no
ENSMUSG00000012114.16	ENSMUSG00000012114.16	Med15	chr16:17651220-17722930	WT_U	WT_D	OK	17.6638	16.0494	-0.138276	0.74887	0.28225	0.539027	no
ENSMUSG00000012117.13	ENSMUSG00000012117.13	Dhdds	chr4:133969027-134000918	WT_U	WT_D	OK	33.5705	34.0778	0.0216382	-0.114296	0.87225	0.957524	no
ENSMUSG00000012123.15	ENSMUSG00000012123.15	Aim1l	chr4:134065911-134095082	WT_U	WT_D	OK	1.48454	1.70353	0.198511	-0.379079	0.5528	0.797911	no
ENSMUSG00000012126.16	ENSMUSG00000012126.16	Ubxn11	chr4:134102569-134128789	WT_U	WT_D	OK	2.25911	2.95893	0.389321	-0.230905	0.5451	0.792149	no
ENSMUSG00000012296.15	ENSMUSG00000012296.15	Tjap1	chr17:46257850-46283026	WT_U	WT_D	OK	19.2073	17.7226	-0.116064	0.591267	0.4009	0.669838	no
ENSMUSG00000012396.12	ENSMUSG00000012396.12	Nanog	chr6:122707488-122714633	WT_U	WT_D	OK	0.101167	0.0446777	-1.17911	1.82145	0.0108	0.0484229	yes
ENSMUSG00000012405.15	ENSMUSG00000012405.15	Rpl15	chr14:18267822-18331859	WT_U	WT_D	OK	348.702	339.928	-0.0367654	0.171619	0.8076	0.935477	no
ENSMUSG00000012422.14	ENSMUSG00000012422.14	Tmem167	chr13:89655311-90143907	WT_U	WT_D	OK	10.1209	9.84398	-0.040024	0.14107	0.8279	0.942898	no
ENSMUSG00000012429.8	ENSMUSG00000012429.8	Mplkip	chr13:17695412-17699105	WT_U	WT_D	OK	1.89736	2.29124	0.272135	-1.24657	0.0741	0.21599	no
ENSMUSG00000012443.3	ENSMUSG00000012443.3	Kif11	chr19:37376402-37421859	WT_U	WT_D	OK	39.1678	37.8311	-0.0500954	0.293373	0.6748	0.873913	no
ENSMUSG00000012483.4	ENSMUSG00000012483.4	Rpa3	chr6:8255935-8259173	WT_U	WT_D	OK	127.267	157.448	0.307017	-1.78136	0.011	0.0491371	yes
ENSMUSG00000012519.14	ENSMUSG00000012519.14	Mlkl	chr8:111311796-111338177	WT_U	WT_D	OK	34.4908	32.7589	-0.0743247	0.427402	0.53445	0.78403	no
ENSMUSG00000012520.10	ENSMUSG00000012520.10	Phox2b	chr5:67094398-67099301	WT_U	WT_D	OK	49.6153	35.1926	-0.495513	2.87089	5e-05	0.00046241	yes
ENSMUSG00000012535.14	ENSMUSG00000012535.14	Tnpo3	chr6:29526624-29609887	WT_U	WT_D	OK	54.6315	52.6625	-0.052957	0.261589	0.6702	0.871725	no
ENSMUSG00000012609.18	ENSMUSG00000012609.18	Ttll5	chr12:85824658-86079041	WT_U	WT_D	OK	11.1013	10.355	-0.100401	0.335955	0.607	0.834065	no
ENSMUSG00000012640.16	ENSMUSG00000012640.16	Zfp715	chr7:43296196-43313294	WT_U	WT_D	OK	8.23624	8.35876	0.0213031	-0.0613233	0.92215	0.97259	no
ENSMUSG00000012848.14	ENSMUSG00000012848.14	Rps5	chr7:12922289-12926686	WT_U	WT_D	OK	902.239	937.082	0.0546656	-0.317071	0.6483	0.858733	no
ENSMUSG00000012889.8	ENSMUSG00000012889.8	Podnl1	chr8:84125988-84132527	WT_U	WT_D	OK	0.171212	0.0680977	-1.33011	2.83117	0.00055	0.00392894	yes
ENSMUSG00000013033.16	ENSMUSG00000013033.16	Adgrl1	chr8:83900104-83955205	WT_U	WT_D	OK	23.5054	19.3402	-0.28139	1.45675	0.02075	0.081544	no
ENSMUSG00000013076.15	ENSMUSG00000013076.15	Amotl1	chr9:14541965-14615483	WT_U	WT_D	OK	0.166371	0.273179	0.715443	-1.52966	0.008	0.0379114	yes
ENSMUSG00000013089.15	ENSMUSG00000013089.15	Etv5	chr16:22381308-22439719	WT_U	WT_D	OK	33.8554	39.0701	0.206679	-1.11967	0.07885	0.226385	no
ENSMUSG00000013150.15	ENSMUSG00000013150.15	Gfod2	chr8:105713853-105758664	WT_U	WT_D	OK	12.4067	12.0976	-0.0363986	0.107138	0.8731	0.957549	no
ENSMUSG00000013155.9	ENSMUSG00000013155.9	Enkd1	chr8:105703654-105707933	WT_U	WT_D	OK	21.4104	21.2924	-0.00797317	0.0401143	0.95505	0.982648	no
ENSMUSG00000013158.5	ENSMUSG00000013158.5	4933405L10Rik	chr8:105708290-105710244	WT_U	WT_D	OK	0.290933	0.197096	-0.561788	1.20007	0.09305	0.25524	no
ENSMUSG00000013160.7	ENSMUSG00000013160.7	Atp6v0d1	chr8:105524464-105566047	WT_U	WT_D	OK	81.7403	81.2377	-0.00889814	0.0512203	0.94255	0.978752	no
ENSMUSG00000013236.16	ENSMUSG00000013236.16	Ptprs	chr17:56412430-56476483	WT_U	WT_D	OK	10.0061	10.5876	0.0814958	-0.460097	0.513	0.767474	no
ENSMUSG00000013275.9	ENSMUSG00000013275.9	Slc41a1	chr1:131827492-131848865	WT_U	WT_D	OK	4.48094	3.78363	-0.24403	1.15743	0.08185	0.232704	no
ENSMUSG00000013367.5	ENSMUSG00000013367.5	Iglon5	chr7:43472903-43490075	WT_U	WT_D	OK	5.07693	5.06816	-0.0024943	0.0121902	0.98655	0.993441	no
ENSMUSG00000013418.8	ENSMUSG00000013418.8	B4galnt2	chr11:95865942-95914891	WT_U	WT_D	OK	0.01601	0.0913238	2.51202	-2.27316	0.0239	0.0911696	no
ENSMUSG00000013419.6	ENSMUSG00000013419.6	Zfp651	chr9:121760032-121771742	WT_U	WT_D	OK	2.03052	1.97921	-0.0369245	0.181012	0.79075	0.929259	no
ENSMUSG00000013465.18	ENSMUSG00000013465.18	Nelfb	chr2:25199711-25211489	WT_U	WT_D	OK	23.6725	22.0294	-0.103782	0.434752	0.5019	0.758272	no
ENSMUSG00000013495.15	ENSMUSG00000013495.15	Tmem175	chr5:108629769-108684557	WT_U	WT_D	OK	6.59891	7.61159	0.20597	-0.49669	0.4733	0.734535	no
ENSMUSG00000013523.13	ENSMUSG00000013523.13	Bcas1	chr2:170346990-170427845	WT_U	WT_D	OK	13.9698	17.1142	0.292882	-1.06315	0.08385	0.236938	no
ENSMUSG00000013539.13	ENSMUSG00000013539.13	Tango2	chr16:18300824-18348103	WT_U	WT_D	OK	9.52135	7.85535	-0.277491	1.07315	0.1335	0.330419	no
ENSMUSG00000013593.12	ENSMUSG00000013593.12	Ndufs2	chr1:171234852-171260637	WT_U	WT_D	OK	128.148	119.693	-0.0984722	0.482983	0.4824	0.742231	no
ENSMUSG00000013611.14	ENSMUSG00000013611.14	Snx31	chr15:36504061-36555573	WT_U	WT_D	OK	0.0645171	0.0849307	0.396605	-0.311259	0.5155	0.769514	no
ENSMUSG00000013622.15	ENSMUSG00000013622.15	Atraid	chr5:31036035-31054623	WT_U	WT_D	OK	28.0158	28.9726	0.0484485	-0.166161	0.81455	0.938015	no
ENSMUSG00000013629.16	ENSMUSG00000013629.16	Cad	chr5:31054779-31078479	WT_U	WT_D	OK	47.4549	43.5743	-0.12308	0.34486	0.5926	0.824535	no
ENSMUSG00000013646.17	ENSMUSG00000013646.17	Sh3bp5l	chr11:58330723-58347728	WT_U	WT_D	OK	14.0363	15.6073	0.153058	-0.720627	0.2678	0.521926	no
ENSMUSG00000013662.5	ENSMUSG00000013662.5	Atad1	chr19:32672562-32712298	WT_U	WT_D	OK	53.0384	61.5648	0.215068	-1.2595	0.0743	0.216422	no
ENSMUSG00000013663.7	ENSMUSG00000013663.7	Pten	chr19:32757496-32826160	WT_U	WT_D	OK	24.492	24.6885	0.0115286	-0.044198	0.95045	0.981331	no
ENSMUSG00000013698.12	ENSMUSG00000013698.12	Pea15a	chr1:172148083-172206804	WT_U	WT_D	OK	36.6882	31.7802	-0.207188	0.735224	0.27745	0.533388	no
ENSMUSG00000013701.12	ENSMUSG00000013701.12	Timm23	chr14:32180161-32201898	WT_U	WT_D	OK	73.3836	68.3864	-0.101748	0.482703	0.48405	0.743434	no
ENSMUSG00000013736.16	ENSMUSG00000013736.16	Trnt1	chr6:106769119-106800077	WT_U	WT_D	OK	60.4539	65.4217	0.113934	-0.459121	0.44735	0.712391	no
ENSMUSG00000013787.15	ENSMUSG00000013787.15	Ehmt2	chr17:34898468-34914052	WT_U	WT_D	OK	38.6129	37.0029	-0.0614446	0.298077	0.6484	0.858741	no
ENSMUSG00000013822.6	ENSMUSG00000013822.6	Elof1	chr9:22112988-22117148	WT_U	WT_D	OK	20.9963	19.3744	-0.115983	0.570122	0.41155	0.680102	no
ENSMUSG00000013833.15	ENSMUSG00000013833.15	Med16	chr10:79894707-79908923	WT_U	WT_D	OK	12.0063	10.262	-0.22648	0.950066	0.13235	0.328457	no
ENSMUSG00000013846.9	ENSMUSG00000013846.9	St3gal1	chr15:67102874-67113992	WT_U	WT_D	OK	0.27127	0.263233	-0.0433891	0.159573	0.82	0.940088	no
ENSMUSG00000013858.14	ENSMUSG00000013858.14	Tmem259	chr10:79970714-79984330	WT_U	WT_D	OK	63.5631	60.8452	-0.063046	0.346167	0.6208	0.842251	no
ENSMUSG00000013878.17	ENSMUSG00000013878.17	Rnf170	chr8:26119367-26143871	WT_U	WT_D	OK	10.4415	9.74783	-0.099176	0.338603	0.6251	0.844619	no
ENSMUSG00000013921.14	ENSMUSG00000013921.14	Clip3	chr7:30291671-30308367	WT_U	WT_D	OK	130.16	143.45	0.140262	-0.449848	0.5261	0.777695	no
ENSMUSG00000013928.12	ENSMUSG00000013928.12	Thap8	chr7:30240137-30290237	WT_U	WT_D	OK	0.129259	0.192248	0.572704	-0.193054	0.7889	0.928464	no
ENSMUSG00000013936.12	ENSMUSG00000013936.12	Myl2	chr5:122100950-122140823	WT_U	WT_D	OK	1.03357	0.709812	-0.542127	0.900991	0.1313	0.326661	no
ENSMUSG00000013973.12	ENSMUSG00000013973.12	Dedd	chr1:171329144-171345646	WT_U	WT_D	OK	29.4543	29.5616	0.00524609	-0.0174663	0.97845	0.990231	no
ENSMUSG00000013997.10	ENSMUSG00000013997.10	Nit1	chr1:171329144-171345646	WT_U	WT_D	OK	20.2955	23.5878	0.216881	-0.752728	0.27715	0.533046	no
ENSMUSG00000014030.15	ENSMUSG00000014030.15	Pax5	chr4:44524756-44710487	WT_U	WT_D	OK	3.51261	3.49753	-0.00620697	0.0166331	0.97465	0.988812	no
ENSMUSG00000014039.17	ENSMUSG00000014039.17	Prdm15	chr16:97791466-97851850	WT_U	WT_D	OK	3.8264	4.1941	0.132374	-0.294079	0.6218	0.842923	no
ENSMUSG00000014074.17	ENSMUSG00000014074.17	Rnf168	chr16:32277458-32301434	WT_U	WT_D	OK	19.6614	21.146	0.105019	-0.512585	0.4619	0.724825	no
ENSMUSG00000014075.15	ENSMUSG00000014075.15	Tctex1d2	chr16:32419701-32429099	WT_U	WT_D	OK	25.9266	24.2587	-0.0959308	0.459189	0.5153	0.76941	no
ENSMUSG00000014077.13	ENSMUSG00000014077.13	Chp1	chr2:119547696-119587027	WT_U	WT_D	OK	40.4182	37.1553	-0.121437	0.565449	0.4095	0.678067	no
ENSMUSG00000014164.14	ENSMUSG00000014164.14	Klhl3	chr13:58004220-58113592	WT_U	WT_D	OK	0.294868	0.279593	-0.076741	0.254288	0.7166	0.896987	no
ENSMUSG00000014177.10	ENSMUSG00000014177.10	Tvp23b	chr11:62879454-62916780	WT_U	WT_D	OK	29.0647	32.3457	0.154306	-0.756839	0.2794	0.535575	no
ENSMUSG00000014195.15	ENSMUSG00000014195.15	Dnajc7	chr11:100574903-100704271	WT_U	WT_D	OK	141.547	148.989	0.0739246	-0.349325	0.60715	0.834191	no
ENSMUSG00000014198.15	ENSMUSG00000014198.15	Zfp385c	chr11:100574903-100704271	WT_U	WT_D	OK	0.077811	0.197433	1.34332	-0.138384	0.27475	0.530262	no
ENSMUSG00000014226.10	ENSMUSG00000014226.10	Cacybp	chr1:160202366-160212875	WT_U	WT_D	OK	216.43	189.842	-0.189101	1.09672	0.11965	0.30656	no
ENSMUSG00000014232.14	ENSMUSG00000014232.14	Cluap1	chr16:3847267-3941147	WT_U	WT_D	OK	7.32161	7.38967	0.013349	-0.0280869	0.9657	0.986374	no
ENSMUSG00000014243.5	ENSMUSG00000014243.5	Zswim7	chr11:62267223-62281375	WT_U	WT_D	OK	5.06278	5.39247	0.0910165	-0.386299	0.58585	0.820154	no
ENSMUSG00000014245.8	ENSMUSG00000014245.8	Pigl	chr11:62281472-62514417	WT_U	WT_D	OK	4.46571	5.04011	0.174566	-0.169677	0.79265	0.929863	no
ENSMUSG00000014294.4	ENSMUSG00000014294.4	Ndufa2	chr18:36735067-36744557	WT_U	WT_D	OK	70.0445	70.3429	0.00613304	-0.0269678	0.9675	0.987025	no
ENSMUSG00000014301.12	ENSMUSG00000014301.12	Pam16	chr16:4594712-4624988	WT_U	WT_D	OK	52.0358	52.4056	0.0102165	-0.0348436	0.96185	0.984901	no
ENSMUSG00000014303.13	ENSMUSG00000014303.13	Glis2	chr16:4594712-4624988	WT_U	WT_D	OK	8.64752	12.7344	0.558373	-1.76496	0.0072	0.0347681	yes
ENSMUSG00000014313.14	ENSMUSG00000014313.14	Cox6c	chr15:35371545-35938246	WT_U	WT_D	OK	335.768	314.435	-0.0947029	0.42222	0.5331	0.782943	no
ENSMUSG00000014349.7	ENSMUSG00000014349.7	Ube2z	chr11:96047431-96065388	WT_U	WT_D	OK	39.1892	37.3682	-0.0686451	0.401987	0.56645	0.808033	no
ENSMUSG00000014353.14	ENSMUSG00000014353.14	Tmem87b	chr2:128818117-128854261	WT_U	WT_D	OK	8.92456	9.60499	0.106003	-0.353099	0.5916	0.82383	no
ENSMUSG00000014355.10	ENSMUSG00000014355.10	Anapc1	chr2:128610103-128687391	WT_U	WT_D	OK	29.5169	31.9081	0.112381	-0.30586	0.64915	0.859202	no
ENSMUSG00000014402.14	ENSMUSG00000014402.14	Tsg101	chr7:46888948-46919969	WT_U	WT_D	OK	64.3546	70.3841	0.129206	-0.621317	0.36795	0.636336	no
ENSMUSG00000014418.15	ENSMUSG00000014418.15	Hps5	chr7:46760465-46796064	WT_U	WT_D	OK	8.9806	10.2782	0.194704	-0.593265	0.38425	0.653327	no
ENSMUSG00000014426.8	ENSMUSG00000014426.8	Map3k4	chr17:12227620-12318660	WT_U	WT_D	OK	10.6613	10.3696	-0.0400231	0.23219	0.7434	0.909041	no
ENSMUSG00000014496.7	ENSMUSG00000014496.7	Ankrd28	chr14:31700014-31830415	WT_U	WT_D	OK	18.6849	16.1959	-0.206244	1.20438	0.0875	0.244153	no
ENSMUSG00000014498.9	ENSMUSG00000014498.9	Ankrd52	chr10:128377114-128411492	WT_U	WT_D	OK	34.3767	33.1402	-0.0528488	0.216801	0.75655	0.914838	no
ENSMUSG00000014504.16	ENSMUSG00000014504.16	Srp19	chr18:34330846-34336599	WT_U	WT_D	OK	68.5983	63.4546	-0.112448	0.54913	0.4329	0.699463	no
ENSMUSG00000014547.9	ENSMUSG00000014547.9	Wdfy2	chr14:62836907-62956886	WT_U	WT_D	OK	4.4859	4.6112	0.0397448	-0.188544	0.78575	0.927273	no
ENSMUSG00000014550.14	ENSMUSG00000014550.14	Rbsn	chr6:92186711-92214925	WT_U	WT_D	OK	12.9551	13.6007	0.0701608	-0.354615	0.59495	0.826152	no
ENSMUSG00000014551.8	ENSMUSG00000014551.8	Mrps25	chr6:92091389-92184033	WT_U	WT_D	OK	30.9189	26.4579	-0.22479	0.372925	0.6009	0.829871	no
ENSMUSG00000014554.13	ENSMUSG00000014554.13	Dguok	chr6:83480216-83506969	WT_U	WT_D	OK	20.5965	19.9931	-0.042897	0.13125	0.84275	0.947876	no
ENSMUSG00000014592.19	ENSMUSG00000014592.19	Camta1	chr4:150914561-151861876	WT_U	WT_D	OK	17.8115	12.7347	-0.484044	0.632945	0.36015	0.627897	no
ENSMUSG00000014599.10	ENSMUSG00000014599.10	Csf1	chr3:107741047-107760469	WT_U	WT_D	OK	7.20777	3.59634	-1.00302	3.50432	5e-05	0.00046241	yes
ENSMUSG00000014601.13	ENSMUSG00000014601.13	Strip1	chr3:107612531-107633090	WT_U	WT_D	OK	18.4593	21.8738	0.244856	-1.2693	0.0517	0.165392	no
ENSMUSG00000014602.15	ENSMUSG00000014602.15	Kif1a	chr1:93015463-93101951	WT_U	WT_D	OK	1.82615	2.04131	0.16069	-0.589264	0.31575	0.578555	no
ENSMUSG00000014603.2	ENSMUSG00000014603.2	Alx3	chr3:107595030-107605776	WT_U	WT_D	OK	0.0840334	0.541077	2.6868	-5.85479	5e-05	0.00046241	yes
ENSMUSG00000014606.14	ENSMUSG00000014606.14	Slc25a11	chr11:70644195-70651421	WT_U	WT_D	OK	31.1793	31.7847	0.0277439	-0.117589	0.8619	0.954222	no
ENSMUSG00000014633.15	ENSMUSG00000014633.15	Cmc2	chr8:116888684-116921455	WT_U	WT_D	OK	43.3306	29.3436	-0.56234	2.0944	0.00265	0.0151033	yes
ENSMUSG00000014668.15	ENSMUSG00000014668.15	Chfr	chr5:110135841-110176504	WT_U	WT_D	OK	34.2289	36.09	0.0763842	-0.306942	0.647	0.857975	no
ENSMUSG00000014748.13	ENSMUSG00000014748.13	Tex261	chr6:83768884-83775813	WT_U	WT_D	OK	32.1937	30.6459	-0.0710843	0.358311	0.5644	0.806544	no
ENSMUSG00000014763.7	ENSMUSG00000014763.7	Fam120b	chr17:15396245-15433580	WT_U	WT_D	OK	5.50662	6.62636	0.26705	-1.34981	0.05385	0.170485	no
ENSMUSG00000014767.16	ENSMUSG00000014767.16	Tbp	chr17:15499887-15528379	WT_U	WT_D	OK	52.1228	51.6114	-0.0142248	0.0547739	0.94015	0.978116	no
ENSMUSG00000014769.9	ENSMUSG00000014769.9	Psmb1	chr17:15475720-15498276	WT_U	WT_D	OK	152.619	157.705	0.0472938	-0.276915	0.6948	0.885479	no
ENSMUSG00000014771.12	ENSMUSG00000014771.12	Pdcd2	chr17:15499887-15528379	WT_U	WT_D	OK	39.7275	46.9973	0.24244	-0.680643	0.3193	0.582482	no
ENSMUSG00000014773.13	ENSMUSG00000014773.13	Dll1	chr17:15367353-15379475	WT_U	WT_D	OK	0.169552	0.23722	0.484498	-0.749662	0.21955	0.461838	no
ENSMUSG00000014776.6	ENSMUSG00000014776.6	Nol3	chr8:105276446-105289528	WT_U	WT_D	OK	8.72049	12.8268	0.55668	-2.14626	0.00295	0.016519	yes
ENSMUSG00000014778.10	ENSMUSG00000014778.10	Fhod1	chr8:105326353-105347953	WT_U	WT_D	OK	4.75752	2.76638	-0.78221	1.86761	0.0018	0.0108711	yes
ENSMUSG00000014782.15	ENSMUSG00000014782.15	Plekhg4	chr8:105373273-105413502	WT_U	WT_D	OK	1.64647	1.65392	0.00651323	-0.0176017	0.9713	0.987964	no
ENSMUSG00000014786.7	ENSMUSG00000014786.7	Slc9a5	chr8:105348257-105369881	WT_U	WT_D	OK	6.95225	6.79936	-0.032081	0.163321	0.8135	0.937581	no
ENSMUSG00000014791.9	ENSMUSG00000014791.9	Elmo3	chr8:105305600-105310623	WT_U	WT_D	OK	0.380341	0.292866	-0.377053	1.28967	0.06675	0.199971	no
ENSMUSG00000014837.14	ENSMUSG00000014837.14	4931428F04Rik	chr8:105276446-105289528	WT_U	WT_D	OK	8.94161	10.5139	0.233691	-0.941409	0.18205	0.408467	no
ENSMUSG00000014846.12	ENSMUSG00000014846.12	Tppp3	chr8:105467492-105471526	WT_U	WT_D	OK	51.5738	47.6263	-0.11488	0.581775	0.4116	0.68014	no
ENSMUSG00000014850.15	ENSMUSG00000014850.15	Msh3	chr13:92211871-92389053	WT_U	WT_D	OK	25.8491	24.3202	-0.087959	0.289857	0.65945	0.865563	no
ENSMUSG00000014852.16	ENSMUSG00000014852.16	Adamts13	chr2:26973415-27009628	WT_U	WT_D	OK	0.0825293	0.0775751	-0.0893128	0.0778063	0.91115	0.969159	no
ENSMUSG00000014856.12	ENSMUSG00000014856.12	Tmem208	chr8:105326353-105347953	WT_U	WT_D	OK	40.0068	39.5561	-0.016345	0.0664018	0.92245	0.972709	no
ENSMUSG00000014859.8	ENSMUSG00000014859.8	E2f4	chr8:105297662-105305369	WT_U	WT_D	OK	49.6655	47.43	-0.0664442	0.38781	0.58115	0.817079	no
ENSMUSG00000014867.9	ENSMUSG00000014867.9	Surf4	chr2:26913380-26933928	WT_U	WT_D	OK	77.6351	84.4061	0.120638	-0.468339	0.49405	0.751969	no
ENSMUSG00000014873.15	ENSMUSG00000014873.15	Surf2	chr2:26913380-26933928	WT_U	WT_D	OK	64.0803	65.3676	0.0286948	-0.0635324	0.9293	0.974721	no
ENSMUSG00000014905.3	ENSMUSG00000014905.3	Dnajb9	chr12:44205896-44210068	WT_U	WT_D	OK	23.4465	72.1155	1.62094	-8.81179	5e-05	0.00046241	yes
ENSMUSG00000014907.9	ENSMUSG00000014907.9	Naf1	chr8:66860216-66890564	WT_U	WT_D	OK	30.7083	27.6263	-0.152586	0.890141	0.2005	0.435819	no
ENSMUSG00000014932.15	ENSMUSG00000014932.15	Yes1	chr5:32458842-32687057	WT_U	WT_D	OK	15.4524	14.3302	-0.108772	0.279155	0.681	0.877521	no
ENSMUSG00000014956.15	ENSMUSG00000014956.15	Ppp1cb	chr5:32458842-32687057	WT_U	WT_D	OK	90.7822	80.8568	-0.16704	0.599469	0.3849	0.653944	no
ENSMUSG00000014959.12	ENSMUSG00000014959.12	Gorasp2	chr2:70661247-70825728	WT_U	WT_D	OK	77.8332	74.5793	-0.0616104	0.237279	0.734	0.905291	no
ENSMUSG00000014980.14	ENSMUSG00000014980.14	Tsen15	chr1:152370734-152386688	WT_U	WT_D	OK	33.6624	33.1235	-0.0232829	0.11271	0.8736	0.95761	no
ENSMUSG00000015002.16	ENSMUSG00000015002.16	Efr3a	chr15:65787033-65873816	WT_U	WT_D	OK	41.6224	38.6073	-0.108486	0.40028	0.5174	0.770994	no
ENSMUSG00000015023.7	ENSMUSG00000015023.7	Ddx19a	chr8:110974995-110997800	WT_U	WT_D	OK	26.8173	24.7971	-0.112993	0.632045	0.3507	0.617687	no
ENSMUSG00000015053.14	ENSMUSG00000015053.14	Gata2	chr6:88193890-88207032	WT_U	WT_D	OK	74.1142	43.3633	-0.773275	2.29348	0.0011	0.00713086	yes
ENSMUSG00000015083.11	ENSMUSG00000015083.11	C8g	chr2:25498650-25505471	WT_U	WT_D	OK	0.190918	0.103035	-0.889819	0.187647	0.4316	0.698331	no
ENSMUSG00000015085.8	ENSMUSG00000015085.8	Entpd2	chr2:25395873-25409494	WT_U	WT_D	OK	0.163161	0.315597	0.951787	-0.357148	0.58625	0.82045	no
ENSMUSG00000015087.14	ENSMUSG00000015087.14	Rabl6	chr2:25583017-25631761	WT_U	WT_D	OK	59.9738	52.6217	-0.188675	0.650026	0.27	0.52451	no
ENSMUSG00000015090.13	ENSMUSG00000015090.13	Ptgds	chr2:25466708-25470046	WT_U	WT_D	OK	0.893984	0.668721	-0.418845	1.12587	0.10765	0.283954	no
ENSMUSG00000015092.9	ENSMUSG00000015092.9	Edf1	chr2:25557846-25562082	WT_U	WT_D	OK	237.368	222.328	-0.0944358	0.551851	0.42965	0.696751	no
ENSMUSG00000015094.16	ENSMUSG00000015094.16	Npdc1	chr2:25395873-25409494	WT_U	WT_D	OK	72.5327	84.3538	0.217822	-1.18211	0.0875	0.244153	no
ENSMUSG00000015095.12	ENSMUSG00000015095.12	Fbxw5	chr2:25498650-25505471	WT_U	WT_D	OK	23.4556	24.6829	0.0735795	-0.308482	0.6524	0.861205	no
ENSMUSG00000015112.15	ENSMUSG00000015112.15	Slc25a13	chr6:6041217-6217173	WT_U	WT_D	OK	1.13022	0.82904	-0.44709	1.47834	0.026	0.0973894	no
ENSMUSG00000015120.15	ENSMUSG00000015120.15	Ube2i	chr17:25261915-25274622	WT_U	WT_D	OK	234.766	228.455	-0.0393135	0.205679	0.7688	0.920233	no
ENSMUSG00000015126.9	ENSMUSG00000015126.9	Tsr3	chr17:25240169-25256364	WT_U	WT_D	OK	19.1029	19.6024	0.0372386	-0.185776	0.79175	0.929638	no
ENSMUSG00000015127.14	ENSMUSG00000015127.14	Unkl	chr17:25188396-25240124	WT_U	WT_D	OK	8.29868	8.78719	0.08252	-0.148467	0.828	0.942969	no
ENSMUSG00000015133.16	ENSMUSG00000015133.16	Lrrk1	chr7:66226911-66388350	WT_U	WT_D	OK	3.85371	3.61952	-0.0904496	0.254578	0.63405	0.85013	no
ENSMUSG00000015134.14	ENSMUSG00000015134.14	Aldh1a3	chr7:66390891-66427517	WT_U	WT_D	OK	1.0265	0.761872	-0.430113	1.47973	0.03135	0.112641	no
ENSMUSG00000015143.14	ENSMUSG00000015143.14	Actn1	chr12:80167541-80260371	WT_U	WT_D	OK	68.0589	60.1761	-0.177593	1.03705	0.13685	0.336244	no
ENSMUSG00000015149.13	ENSMUSG00000015149.13	Sirt2	chr7:28756173-28788665	WT_U	WT_D	OK	21.3151	21.3676	0.00354905	-0.0137532	0.9838	0.992227	no
ENSMUSG00000015165.16	ENSMUSG00000015165.16	Hnrnpl	chr7:28808540-28822266	WT_U	WT_D	OK	295.844	260.007	-0.186286	0.734127	0.2951	0.55478	no
ENSMUSG00000015176.9	ENSMUSG00000015176.9	Nolc1	chr19:46075862-46085528	WT_U	WT_D	OK	70.6484	64.3063	-0.135697	0.794123	0.261	0.513538	no
ENSMUSG00000015189.12	ENSMUSG00000015189.12	Casd1	chr6:4600838-4643355	WT_U	WT_D	OK	19.4862	23.4169	0.265097	-0.988069	0.07075	0.208887	no
ENSMUSG00000015202.13	ENSMUSG00000015202.13	Cnksr3	chr10:7119062-7212237	WT_U	WT_D	OK	0.0584299	0.127851	1.12968	-2.36024	0.0016	0.00983992	yes
ENSMUSG00000015217.11	ENSMUSG00000015217.11	Hmgb3	chrX:71555917-71560676	WT_U	WT_D	OK	81.0454	81.4756	0.00763777	-0.0390657	0.9544	0.982484	no
ENSMUSG00000015222.17	ENSMUSG00000015222.17	Map2	chr1:66175272-66442583	WT_U	WT_D	OK	31.601	32.0501	0.0203586	-0.0580102	0.93075	0.975221	no
ENSMUSG00000015243.4	ENSMUSG00000015243.4	Abca1	chr4:53030786-53159895	WT_U	WT_D	OK	0.609998	1.0153	0.73503	-3.14171	5e-05	0.00046241	yes
ENSMUSG00000015247.10	ENSMUSG00000015247.10	Nipsnap3b	chr4:53011879-53022060	WT_U	WT_D	OK	17.5524	18.1551	0.0487066	-0.216965	0.75295	0.913417	no
ENSMUSG00000015289.4	ENSMUSG00000015289.4	Lage3	chrX:74351275-74353618	WT_U	WT_D	OK	23.5207	20.715	-0.183255	0.893909	0.19965	0.434632	no
ENSMUSG00000015290.15	ENSMUSG00000015290.15	Ubl4a	chrX:74365717-74373349	WT_U	WT_D	OK	40.7456	45.2432	0.151057	-0.685647	0.32395	0.588	no
ENSMUSG00000015291.10	ENSMUSG00000015291.10	Gdi1	chrX:74304997-74311862	WT_U	WT_D	OK	102.152	110.126	0.108438	-0.534625	0.41785	0.685953	no
ENSMUSG00000015305.5	ENSMUSG00000015305.5	Sash1	chr10:8722218-8886880	WT_U	WT_D	OK	3.46202	3.88155	0.165019	-0.831234	0.2395	0.487045	no
ENSMUSG00000015312.8	ENSMUSG00000015312.8	Gadd45b	chr10:80930090-80932204	WT_U	WT_D	OK	6.13499	1.74535	-1.81354	7.74653	5e-05	0.00046241	yes
ENSMUSG00000015335.16	ENSMUSG00000015335.16	Zdhhc12	chr2:30077683-30093648	WT_U	WT_D	OK	32.3515	31.402	-0.0429762	0.171474	0.8067	0.935241	no
ENSMUSG00000015337.5	ENSMUSG00000015337.5	Endog	chr2:30171492-30178459	WT_U	WT_D	OK	7.24236	6.30225	-0.200593	0.375219	0.60065	0.829698	no
ENSMUSG00000015341.16	ENSMUSG00000015341.16	Golga7	chr8:23241352-23257074	WT_U	WT_D	OK	68.4444	67.9533	-0.0103889	0.0583336	0.9352	0.976667	no
ENSMUSG00000015357.10	ENSMUSG00000015357.10	Clpx	chr9:65294259-65330658	WT_U	WT_D	OK	12.7209	13.4824	0.0838766	-0.413962	0.541	0.78919	no
ENSMUSG00000015363.13	ENSMUSG00000015363.13	Trabd	chr15:89059733-89087077	WT_U	WT_D	OK	32.2056	33.759	0.0679606	-0.340732	0.62105	0.842442	no
ENSMUSG00000015377.9	ENSMUSG00000015377.9	Dennd6b	chr15:89182216-89196474	WT_U	WT_D	OK	3.08911	3.15674	0.0312442	-0.154189	0.82435	0.941502	no
ENSMUSG00000015396.3	ENSMUSG00000015396.3	Cd83	chr13:43785106-43803130	WT_U	WT_D	OK	0.543764	0.314954	-0.78784	2.55097	0.00065	0.00454161	yes
ENSMUSG00000015401.12	ENSMUSG00000015401.12	Tmem27	chrX:164088829-164118860	WT_U	WT_D	OK	0.128685	0.0466733	-1.46317	1.08464	0.0721	0.211762	no
ENSMUSG00000015451.16	ENSMUSG00000015451.16	C4a	chr17:34809091-34823464	WT_U	WT_D	OK	0.793924	0.596416	-0.412682	0.579598	0.3447	0.611408	no
ENSMUSG00000015452.14	ENSMUSG00000015452.14	Ager	chr17:34597861-34600936	WT_U	WT_D	OK	1.07907	0.966703	-0.158644	0.576693	0.40285	0.671763	no
ENSMUSG00000015461.15	ENSMUSG00000015461.15	Atf6b	chr17:34647145-34655074	WT_U	WT_D	OK	28.993	27.4504	-0.0788774	0.393786	0.52325	0.775468	no
ENSMUSG00000015467.14	ENSMUSG00000015467.14	Egfl8	chr17:34604261-34628510	WT_U	WT_D	OK	0.347181	0.246521	-0.493977	0.142779	0.6586	0.864912	no
ENSMUSG00000015468.14	ENSMUSG00000015468.14	Notch4	chr17:34564267-34588503	WT_U	WT_D	OK	0.720065	0.82282	0.19245	-0.303938	0.62415	0.844167	no
ENSMUSG00000015474.16	ENSMUSG00000015474.16	Ppt2	chr17:34604261-34628510	WT_U	WT_D	OK	19.7135	19.7856	0.00526688	-0.014116	0.9828	0.991919	no
ENSMUSG00000015476.6	ENSMUSG00000015476.6	Prrt1	chr17:34629532-34633126	WT_U	WT_D	OK	0.307557	0.441915	0.522915	-1.34194	0.0567	0.177228	no
ENSMUSG00000015478.13	ENSMUSG00000015478.13	Rnf5	chr17:34601090-34603690	WT_U	WT_D	OK	43.7335	46.5823	0.0910431	-0.4614	0.50445	0.760554	no
ENSMUSG00000015484.3	ENSMUSG00000015484.3	Fam163a	chr1:156075965-156205026	WT_U	WT_D	OK	4.12141	4.00766	-0.0403779	0.199977	0.7759	0.923107	no
ENSMUSG00000015488.14	ENSMUSG00000015488.14	Cacfd1	chr2:27009925-27021089	WT_U	WT_D	OK	18.1973	20.2165	0.151809	-0.641597	0.29185	0.550757	no
ENSMUSG00000015501.10	ENSMUSG00000015501.10	Hivep2	chr10:13966074-14154446	WT_U	WT_D	OK	8.51462	7.79503	-0.127388	0.57827	0.36465	0.63266	no
ENSMUSG00000015522.18	ENSMUSG00000015522.18	Arnt	chr3:95434387-95497240	WT_U	WT_D	OK	14.1541	13.4539	-0.0731956	0.31105	0.62025	0.841858	no
ENSMUSG00000015533.8	ENSMUSG00000015533.8	Itga2	chr13:114835915-114932041	WT_U	WT_D	OK	1.38544	0.883326	-0.649326	2.92424	5e-05	0.00046241	yes
ENSMUSG00000015536.14	ENSMUSG00000015536.14	Mocs2	chr13:114818235-114832275	WT_U	WT_D	OK	44.1853	45.7309	0.0496028	-0.238827	0.73015	0.903512	no
ENSMUSG00000015542.17	ENSMUSG00000015542.17	Nat9	chr11:115182831-115247023	WT_U	WT_D	OK	14.1932	17.5191	0.303729	-0.951378	0.1616	0.376959	no
ENSMUSG00000015575.14	ENSMUSG00000015575.14	Atp6v0e	chr17:26676395-26699644	WT_U	WT_D	OK	51.6424	51.7844	0.0039615	-0.0196831	0.97695	0.989692	no
ENSMUSG00000015579.4	ENSMUSG00000015579.4	Nkx2-5	chr17:26838663-26841565	WT_U	WT_D	OK	18.5694	16.8251	-0.142312	0.716842	0.3	0.560814	no
ENSMUSG00000015597.16	ENSMUSG00000015597.16	Zfp318	chr17:46383730-46420920	WT_U	WT_D	OK	13.4122	13.5049	0.00993706	-0.0305159	0.9645	0.985841	no
ENSMUSG00000015599.8	ENSMUSG00000015599.8	Ttbk1	chr17:46442447-46831413	WT_U	WT_D	OK	7.80316	8.31978	0.0924869	-0.140219	0.8415	0.947509	no
ENSMUSG00000015605.5	ENSMUSG00000015605.5	Srf	chr17:46442447-46831413	WT_U	WT_D	OK	20.3822	17.5612	-0.214918	0.381862	0.58815	0.821686	no
ENSMUSG00000015619.10	ENSMUSG00000015619.10	Gata3	chr2:9857077-9890034	WT_U	WT_D	OK	5.5008	3.76432	-0.547252	2.50347	0.0003	0.00231843	yes
ENSMUSG00000015647.9	ENSMUSG00000015647.9	Lama5	chr2:180176372-180225859	WT_U	WT_D	OK	3.42446	1.77665	-0.946717	4.68504	5e-05	0.00046241	yes
ENSMUSG00000015652.9	ENSMUSG00000015652.9	Steap1	chr5:5736316-5749326	WT_U	WT_D	OK	0.783652	3.02277	1.94759	-7.1471	5e-05	0.00046241	yes
ENSMUSG00000015653.13	ENSMUSG00000015653.13	Steap2	chr5:5664828-5694578	WT_U	WT_D	OK	0.0134971	0.0856087	2.66511	-2.44711	0.00015	0.00125317	yes
ENSMUSG00000015656.16	ENSMUSG00000015656.16	Hspa8	chr9:40800983-40805200	WT_U	WT_D	OK	1263.53	1391.83	0.139523	-0.562124	0.43055	0.697466	no
ENSMUSG00000015659.12	ENSMUSG00000015659.12	Serac1	chr17:5941279-6079741	WT_U	WT_D	OK	3.36213	3.08243	-0.125307	0.249144	0.67905	0.876466	no
ENSMUSG00000015668.13	ENSMUSG00000015668.13	Pdzd11	chrX:100622882-100727214	WT_U	WT_D	OK	24.7267	22.9813	-0.105609	0.305962	0.66145	0.866904	no
ENSMUSG00000015671.10	ENSMUSG00000015671.10	Psma2	chr13:14613241-14625671	WT_U	WT_D	OK	150.67	142.456	-0.0808758	0.473052	0.50535	0.761384	no
ENSMUSG00000015672.3	ENSMUSG00000015672.3	Mrpl32	chr13:14610300-14613037	WT_U	WT_D	OK	40.4518	47.3429	0.226944	-1.14488	0.10015	0.269333	no
ENSMUSG00000015697.14	ENSMUSG00000015697.14	Setdb1	chr3:95253673-95357572	WT_U	WT_D	OK	23.2893	23.4009	0.00689674	-0.024179	0.97265	0.988224	no
ENSMUSG00000015702.13	ENSMUSG00000015702.13	Anxa9	chr3:95253673-95357572	WT_U	WT_D	OK	2.41728	2.07131	-0.222841	0.118049	0.83015	0.943658	no
ENSMUSG00000015711.8	ENSMUSG00000015711.8	Prune	chr3:95253673-95357572	WT_U	WT_D	OK	9.18462	9.79596	0.0929668	-0.173043	0.8022	0.933333	no
ENSMUSG00000015714.11	ENSMUSG00000015714.11	Cers2	chr3:95253673-95357572	WT_U	WT_D	OK	57.2132	66.7547	0.222521	-0.709551	0.3027	0.563946	no
ENSMUSG00000015733.13	ENSMUSG00000015733.13	Capza2	chr6:17636233-17666972	WT_U	WT_D	OK	144.768	129.685	-0.158731	0.586268	0.3909	0.659886	no
ENSMUSG00000015745.9	ENSMUSG00000015745.9	Plekho1	chr3:95988428-95996001	WT_U	WT_D	OK	30.5788	37.7033	0.302159	-1.29905	0.0602	0.185375	no
ENSMUSG00000015747.5	ENSMUSG00000015747.5	Vps45	chr3:95999831-96058466	WT_U	WT_D	OK	7.96871	7.47014	-0.0932109	0.273908	0.5745	0.812989	no
ENSMUSG00000015748.13	ENSMUSG00000015748.13	Prpf3	chr3:95830123-95855885	WT_U	WT_D	OK	30.8544	30.4303	-0.0199677	0.09577	0.8886	0.962108	no
ENSMUSG00000015749.12	ENSMUSG00000015749.12	Anp32e	chr3:95929245-95947390	WT_U	WT_D	OK	482.408	413.759	-0.221463	0.955627	0.1766	0.400028	no
ENSMUSG00000015750.15	ENSMUSG00000015750.15	Aph1a	chr3:95893968-95904691	WT_U	WT_D	OK	9.79297	9.41888	-0.0561909	0.26202	0.69185	0.883889	no
ENSMUSG00000015755.16	ENSMUSG00000015755.16	Tab2	chr10:7905652-7956230	WT_U	WT_D	OK	65.717	72.685	0.145391	-0.717421	0.27775	0.533678	no
ENSMUSG00000015757.10	ENSMUSG00000015757.10	Ppil4	chr10:7792890-7823135	WT_U	WT_D	OK	32.535	33.6531	0.0487469	-0.270903	0.69	0.88255	no
ENSMUSG00000015759.10	ENSMUSG00000015759.10	Cnih1	chr14:46775581-46788411	WT_U	WT_D	OK	59.9491	59.3584	-0.0142859	0.0833337	0.9042	0.966946	no
ENSMUSG00000015776.12	ENSMUSG00000015776.12	Med22	chr2:26905261-26910677	WT_U	WT_D	OK	18.9042	21.0022	0.151834	-0.58091	0.40825	0.676818	no
ENSMUSG00000015790.16	ENSMUSG00000015790.16	Surf1	chr2:26913380-26933928	WT_U	WT_D	OK	33.203	35.9706	0.115505	-0.162943	0.82115	0.940341	no
ENSMUSG00000015804.14	ENSMUSG00000015804.14	Med28	chr5:45520228-45529276	WT_U	WT_D	OK	77.3838	74.2153	-0.0603149	0.295689	0.67255	0.872787	no
ENSMUSG00000015806.12	ENSMUSG00000015806.12	Qdpr	chr5:45434020-45450236	WT_U	WT_D	OK	43.703	35.4763	-0.300877	1.52198	0.0271	0.10067	no
ENSMUSG00000015812.7	ENSMUSG00000015812.7	Gnrh1	chr14:67745228-67749435	WT_U	WT_D	OK	0.26052	0.273329	0.0692444	-0.0968083	0.88495	0.961166	no
ENSMUSG00000015829.13	ENSMUSG00000015829.13	Tnr	chr1:159523768-159931729	WT_U	WT_D	OK	0.227891	0.815983	1.8402	-3.54998	5e-05	0.00046241	yes
ENSMUSG00000015837.15	ENSMUSG00000015837.15	Sqstm1	chr11:50174443-50210827	WT_U	WT_D	OK	190.436	396.933	1.05959	-4.83583	5e-05	0.00046241	yes
ENSMUSG00000015839.6	ENSMUSG00000015839.6	Nfe2l2	chr2:75675512-75704641	WT_U	WT_D	OK	20.6423	28.7123	0.476065	-2.54986	0.0001	0.000870202	yes
ENSMUSG00000015846.14	ENSMUSG00000015846.14	Rxra	chr2:27676439-27762957	WT_U	WT_D	OK	2.17728	2.13999	-0.0249229	0.0789486	0.9088	0.968344	no
ENSMUSG00000015850.11	ENSMUSG00000015850.11	Adamtsl4	chr3:95676200-95687917	WT_U	WT_D	OK	0.262489	0.0925412	-1.50409	1.39465	0.00165	0.0100954	yes
ENSMUSG00000015869.16	ENSMUSG00000015869.16	Prpsap1	chr11:116466318-116494202	WT_U	WT_D	OK	51.9947	50.1778	-0.0513154	0.262919	0.7091	0.893217	no
ENSMUSG00000015879.8	ENSMUSG00000015879.8	Fam184b	chr5:45529704-45645469	WT_U	WT_D	OK	0.767584	0.298847	-1.36092	5.2062	5e-05	0.00046241	yes
ENSMUSG00000015880.13	ENSMUSG00000015880.13	Ncapg	chr5:45669918-45857615	WT_U	WT_D	OK	35.0367	30.496	-0.200247	0.819224	0.2069	0.444609	no
ENSMUSG00000015882.17	ENSMUSG00000015882.17	Lcorl	chr5:45669918-45857615	WT_U	WT_D	OK	47.6842	39.4947	-0.271852	0.352975	0.6163	0.839784	no
ENSMUSG00000015889.7	ENSMUSG00000015889.7	Lta4h	chr10:93453395-93484896	WT_U	WT_D	OK	35.4084	34.3803	-0.0425095	0.247401	0.7263	0.901705	no
ENSMUSG00000015890.2	ENSMUSG00000015890.2	Amdhd1	chr10:93523337-93540033	WT_U	WT_D	OK	0.105902	0.125427	0.244118	-0.543286	0.4428	0.70823	no
ENSMUSG00000015932.8	ENSMUSG00000015932.8	Dstn	chr2:143915319-143943324	WT_U	WT_D	OK	168.643	137.98	-0.289513	1.69289	0.01735	0.0708648	no
ENSMUSG00000015937.14	ENSMUSG00000015937.14	H2afy	chr13:56073618-56136361	WT_U	WT_D	OK	133.781	136.963	0.033913	-0.173688	0.79965	0.932597	no
ENSMUSG00000015942.9	ENSMUSG00000015942.9	Gtf2ird2	chr5:134184018-134229625	WT_U	WT_D	OK	0.858784	1.44015	0.745852	-2.02515	0.0044	0.0230937	yes
ENSMUSG00000015943.11	ENSMUSG00000015943.11	Bola1	chr3:96196587-96220308	WT_U	WT_D	OK	13.3603	19.3704	0.535901	-2.53536	0.00015	0.00125317	yes
ENSMUSG00000015944.9	ENSMUSG00000015944.9	Gatsl2	chr5:134099710-134144343	WT_U	WT_D	OK	3.05315	3.1582	0.0488041	-0.204002	0.73955	0.907606	no
ENSMUSG00000015950.13	ENSMUSG00000015950.13	Ncf1	chr5:134184018-134229625	WT_U	WT_D	OK	0.380696	0.519879	0.449536	-0.720165	0.2772	0.533112	no
ENSMUSG00000015957.11	ENSMUSG00000015957.11	Wnt11	chr7:98835111-98855195	WT_U	WT_D	OK	1.17549	1.32435	0.172022	-0.537232	0.44235	0.707894	no
ENSMUSG00000015961.8	ENSMUSG00000015961.8	Adss	chr1:177762961-177796511	WT_U	WT_D	OK	38.5701	37.8688	-0.0264732	0.152796	0.8259	0.942087	no
ENSMUSG00000015971.4	ENSMUSG00000015971.4	Actr8	chr14:29978336-29993221	WT_U	WT_D	OK	16.6489	16.602	-0.00406981	0.0206607	0.9744	0.988748	no
ENSMUSG00000015980.14	ENSMUSG00000015980.14	Lrrc27	chr7:139103637-139242979	WT_U	WT_D	OK	8.31537	9.27706	0.157887	-0.370967	0.57245	0.811715	no
ENSMUSG00000015981.12	ENSMUSG00000015981.12	Stk32c	chr7:139103637-139242979	WT_U	WT_D	OK	6.19871	7.71269	0.315266	-1.25022	0.0744	0.216638	no
ENSMUSG00000015994.9	ENSMUSG00000015994.9	Fnta	chr8:25998728-26015601	WT_U	WT_D	OK	68.4411	72.5243	0.0836015	-0.489192	0.4895	0.748408	no
ENSMUSG00000016018.3	ENSMUSG00000016018.3	Skiv2l2	chr13:112800893-112927380	WT_U	WT_D	OK	61.4993	58.397	-0.0746757	0.378338	0.5916	0.82383	no
ENSMUSG00000016024.9	ENSMUSG00000016024.9	Lbp	chr2:158306492-158332852	WT_U	WT_D	OK	0.0559204	0.104797	0.906151	-0.955015	0.06715	0.200923	no
ENSMUSG00000016028.9	ENSMUSG00000016028.9	Celsr1	chr15:85898757-86033777	WT_U	WT_D	OK	0.0698394	0.0763538	0.128659	-0.418652	0.5561	0.800518	no
ENSMUSG00000016128.14	ENSMUSG00000016128.14	Stard13	chr5:151037509-151432118	WT_U	WT_D	OK	3.36567	3.97576	0.240337	-0.671494	0.3007	0.561598	no
ENSMUSG00000016181.9	ENSMUSG00000016181.9	Diexf	chr1:193091103-193130272	WT_U	WT_D	OK	20.7523	21.8763	0.0760975	-0.191145	0.7444	0.909431	no
ENSMUSG00000016200.13	ENSMUSG00000016200.13	Syt14	chr1:192891232-193035775	WT_U	WT_D	OK	10.6878	10.4316	-0.0350045	0.177659	0.7944	0.930391	no
ENSMUSG00000016206.6	ENSMUSG00000016206.6	H2-M3	chr17:37270219-37274484	WT_U	WT_D	OK	3.36298	4.68637	0.478731	-2.1798	0.00195	0.0116367	yes
ENSMUSG00000016239.11	ENSMUSG00000016239.11	Lonrf3	chrX:36328352-36362341	WT_U	WT_D	OK	2.86399	3.49037	0.285354	-1.08481	0.11745	0.302626	no
ENSMUSG00000016252.7	ENSMUSG00000016252.7	Atp5e	chr2:174461071-174464105	WT_U	WT_D	OK	150.838	142.76	-0.0794081	0.395327	0.5672	0.808447	no
ENSMUSG00000016253.12	ENSMUSG00000016253.12	Nelfcd	chr2:174415803-174439039	WT_U	WT_D	OK	29.4766	25.5264	-0.20758	0.619043	0.3416	0.608084	no
ENSMUSG00000016256.10	ENSMUSG00000016256.10	Ctsz	chr2:174415803-174439039	WT_U	WT_D	OK	77.6399	72.4642	-0.0995298	0.464268	0.5087	0.763996	no
ENSMUSG00000016257.15	ENSMUSG00000016257.15	Slmo2	chr2:174465066-174473081	WT_U	WT_D	OK	107.528	90.614	-0.246907	1.29469	0.0539	0.170584	no
ENSMUSG00000016262.14	ENSMUSG00000016262.14	Sertad4	chr1:192844487-192856246	WT_U	WT_D	OK	13.5352	9.88446	-0.453482	1.99257	0.0018	0.0108711	yes
ENSMUSG00000016308.12	ENSMUSG00000016308.12	Ube2a	chrX:36823736-36884222	WT_U	WT_D	OK	30.9862	25.4821	-0.282142	0.780561	0.2688	0.523031	no
ENSMUSG00000016319.3	ENSMUSG00000016319.3	Slc25a5	chrX:36795650-36798807	WT_U	WT_D	OK	282.641	239.414	-0.239463	1.39814	0.04315	0.144215	no
ENSMUSG00000016344.14	ENSMUSG00000016344.14	Ppdpf	chr2:181187246-181188771	WT_U	WT_D	OK	25.0604	35.9018	0.518647	-2.38305	0.0005	0.00361297	yes
ENSMUSG00000016346.17	ENSMUSG00000016346.17	Kcnq2	chr2:181075578-181135300	WT_U	WT_D	OK	16.1705	14.7719	-0.130509	0.647343	0.3441	0.610711	no
ENSMUSG00000016349.10	ENSMUSG00000016349.10	Eef1a2	chr2:181147652-181157014	WT_U	WT_D	OK	115.128	165.843	0.526579	-3.0791	5e-05	0.00046241	yes
ENSMUSG00000016356.17	ENSMUSG00000016356.17	Col20a1	chr2:180983923-181017540	WT_U	WT_D	OK	0.395046	0.54418	0.462063	-0.721875	0.22305	0.466176	no
ENSMUSG00000016382.15	ENSMUSG00000016382.15	Pls3	chrX:75785653-75875182	WT_U	WT_D	OK	0.474228	0.480043	0.0175828	-0.064735	0.9256	0.973715	no
ENSMUSG00000016409.4	ENSMUSG00000016409.4	Nkap	chrX:37126794-37168842	WT_U	WT_D	OK	21.3294	20.9717	-0.0243996	0.0624799	0.92535	0.973637	no
ENSMUSG00000016427.7	ENSMUSG00000016427.7	Ndufa1	chrX:37187587-37191163	WT_U	WT_D	OK	136.045	146.353	0.105368	-0.5343	0.4491	0.713828	no
ENSMUSG00000016477.17	ENSMUSG00000016477.17	E2f3	chr13:29906574-29985668	WT_U	WT_D	OK	27.4007	27.049	-0.0186375	0.0215641	0.9424	0.978698	no
ENSMUSG00000016481.15	ENSMUSG00000016481.15	Cr1l	chr1:195097381-195131586	WT_U	WT_D	OK	46.3243	56.8995	0.296647	-1.51092	0.02855	0.10481	no
ENSMUSG00000016487.15	ENSMUSG00000016487.15	Ppfibp1	chr6:146888486-147032025	WT_U	WT_D	OK	75.5822	59.1794	-0.352951	1.12193	0.09605	0.261344	no
ENSMUSG00000016493.13	ENSMUSG00000016493.13	Cd46	chr1:194938818-195092249	WT_U	WT_D	OK	0.244517	0.35432	0.535118	-0.990242	0.1603	0.374921	no
ENSMUSG00000016495.12	ENSMUSG00000016495.12	Plgrkt	chr19:29348598-29367390	WT_U	WT_D	OK	23.5133	26.7294	0.18495	-0.863132	0.21295	0.452832	no
ENSMUSG00000016496.7	ENSMUSG00000016496.7	Cd274	chr19:29367454-29388095	WT_U	WT_D	OK	2.06711	2.56181	0.309548	-1.47193	0.03525	0.12341	no
ENSMUSG00000016503.16	ENSMUSG00000016503.16	Gtf3a	chr5:146948656-146963800	WT_U	WT_D	OK	47.9268	44.7542	-0.0988095	0.498604	0.47705	0.737533	no
ENSMUSG00000016510.11	ENSMUSG00000016510.11	Mtif3	chr5:146948656-146963800	WT_U	WT_D	OK	16.3529	16.4437	0.00798845	-0.0198649	0.9745	0.98881	no
ENSMUSG00000016520.7	ENSMUSG00000016520.7	Lnx2	chr5:147016654-147076586	WT_U	WT_D	OK	3.64759	3.34408	-0.125334	0.620814	0.37315	0.641828	no
ENSMUSG00000016526.8	ENSMUSG00000016526.8	Dyrk3	chr1:131127454-131138340	WT_U	WT_D	OK	4.03993	3.95614	-0.0302368	0.130295	0.84765	0.949685	no
ENSMUSG00000016528.10	ENSMUSG00000016528.10	Mapkapk2	chr1:131053699-131097826	WT_U	WT_D	OK	21.1088	14.8656	-0.505867	2.53646	0.0002	0.00162246	yes
ENSMUSG00000016534.15	ENSMUSG00000016534.15	Lamp2	chrX:38401356-38456454	WT_U	WT_D	OK	26.0302	26.3921	0.0199198	-0.107054	0.87765	0.959103	no
ENSMUSG00000016541.9	ENSMUSG00000016541.9	Atxn10	chr15:85336380-85463836	WT_U	WT_D	OK	49.3654	49.1279	-0.00695765	0.0406178	0.9531	0.982084	no
ENSMUSG00000016552.13	ENSMUSG00000016552.13	Foxred2	chr15:77940521-77956722	WT_U	WT_D	OK	7.65991	8.42988	0.138185	-0.672352	0.33455	0.600463	no
ENSMUSG00000016554.8	ENSMUSG00000016554.8	Eif3d	chr15:77958997-77970824	WT_U	WT_D	OK	217.687	218.471	0.00518653	-0.0302233	0.96475	0.985996	no
ENSMUSG00000016559.14	ENSMUSG00000016559.14	H3f3b	chr11:116021911-116027962	WT_U	WT_D	OK	945.229	793.478	-0.252474	1.18429	0.0886	0.246393	no
ENSMUSG00000016619.9	ENSMUSG00000016619.9	Nup50	chr15:84923427-84942955	WT_U	WT_D	OK	27.5681	27.0592	-0.0268807	0.157299	0.82095	0.940305	no
ENSMUSG00000016624.15	ENSMUSG00000016624.15	Phf21b	chr15:84785380-84856049	WT_U	WT_D	OK	43.6832	34.9882	-0.32021	1.21061	0.03685	0.127669	no
ENSMUSG00000016626.10	ENSMUSG00000016626.10	Nlrp14	chr7:107166989-107198102	WT_U	WT_D	OK	0.946661	0.74671	-0.3423	1.42557	0.04265	0.142944	no
ENSMUSG00000016637.6	ENSMUSG00000016637.6	Ift27	chr15:78159464-78174108	WT_U	WT_D	OK	22.1109	22.3265	0.0139994	-0.0698779	0.9193	0.971565	no
ENSMUSG00000016664.14	ENSMUSG00000016664.14	Pacsin2	chr15:83375606-83464606	WT_U	WT_D	OK	85.4856	84.8567	-0.0106528	0.0614661	0.92865	0.974582	no
ENSMUSG00000016757.10	ENSMUSG00000016757.10	Ttll12	chr15:83575118-83595157	WT_U	WT_D	OK	41.8562	40.7779	-0.0376539	0.217636	0.75395	0.913844	no
ENSMUSG00000016758.3	ENSMUSG00000016758.3	Bik	chr15:83526861-83544635	WT_U	WT_D	OK	0.240563	0.403556	0.746354	-1.56902	0.0279	0.102978	no
ENSMUSG00000016831.11	ENSMUSG00000016831.11	Tox4	chr14:52258810-52305128	WT_U	WT_D	OK	16.7875	17.0877	0.0255708	-0.0988217	0.87315	0.957549	no
ENSMUSG00000016833.14	ENSMUSG00000016833.14	Mrps18c	chr5:100798626-100804471	WT_U	WT_D	OK	49.0221	47.6143	-0.0420374	0.192114	0.7774	0.923915	no
ENSMUSG00000016918.15	ENSMUSG00000016918.15	Sulf1	chr1:12692276-12861192	WT_U	WT_D	OK	0.273705	0.350617	0.357274	-0.943337	0.1269	0.319306	no
ENSMUSG00000016921.14	ENSMUSG00000016921.14	Srsf6	chr2:162931527-162937121	WT_U	WT_D	OK	112.561	115.447	0.0365236	-0.200633	0.7797	0.924975	no
ENSMUSG00000016933.17	ENSMUSG00000016933.17	Plcg1	chr2:160731299-160906002	WT_U	WT_D	OK	29.9647	28.1734	-0.0889302	0.260278	0.64575	0.857216	no
ENSMUSG00000016940.18	ENSMUSG00000016940.18	Kctd2	chr11:115420127-115431274	WT_U	WT_D	OK	16.2439	18.5472	0.191303	-0.907806	0.1899	0.420153	no
ENSMUSG00000016942.5	ENSMUSG00000016942.5	Tmprss6	chr15:78439667-78468634	WT_U	WT_D	OK	0.106614	0.0951472	-0.164164	0.387066	0.5807	0.816802	no
ENSMUSG00000016946.5	ENSMUSG00000016946.5	Kctd5	chr17:24047733-24073485	WT_U	WT_D	OK	16.0111	16.258	0.0220774	-0.112447	0.8738	0.957704	no
ENSMUSG00000016984.7	ENSMUSG00000016984.7	Etaa1	chr11:17938755-17953875	WT_U	WT_D	OK	11.3449	11.4035	0.0074328	-0.0380407	0.95575	0.982794	no
ENSMUSG00000016995.17	ENSMUSG00000016995.17	Matn4	chr2:164389392-164415448	WT_U	WT_D	OK	7.48177	7.37094	-0.021531	0.0971804	0.8902	0.962796	no
ENSMUSG00000017002.14	ENSMUSG00000017002.14	Slpi	chr2:164354069-164389095	WT_U	WT_D	OK	0.411707	0.421347	0.0333909	-0.062384	0.9293	0.974721	no
ENSMUSG00000017007.9	ENSMUSG00000017007.9	Rbpjl	chr2:164389392-164415448	WT_U	WT_D	OK	0.50936	0.800491	0.6522	-0.883632	0.1673	0.385658	no
ENSMUSG00000017009.3	ENSMUSG00000017009.3	Sdc4	chr2:164424246-164443887	WT_U	WT_D	OK	0.655597	0.474511	-0.466368	1.25212	0.07055	0.208407	no
ENSMUSG00000017057.9	ENSMUSG00000017057.9	Il13ra1	chrX:36112109-36171259	WT_U	WT_D	OK	2.66133	0.935817	-1.50785	6.88385	5e-05	0.00046241	yes
ENSMUSG00000017119.19	ENSMUSG00000017119.19	Nbr1	chr11:101552148-101581951	WT_U	WT_D	OK	37.5945	43.3489	0.205474	-0.88871	0.1	0.269023	no
ENSMUSG00000017132.17	ENSMUSG00000017132.17	Cyth1	chr11:118132018-118248592	WT_U	WT_D	OK	9.72159	11.4384	0.234621	-0.625603	0.35155	0.618576	no
ENSMUSG00000017144.8	ENSMUSG00000017144.8	Rnd3	chr2:51130437-51149111	WT_U	WT_D	OK	13.1721	11.5118	-0.194372	0.859093	0.21035	0.449382	no
ENSMUSG00000017146.12	ENSMUSG00000017146.12	Brca1	chr11:101488763-101551955	WT_U	WT_D	OK	22.3367	19.3388	-0.207918	0.838181	0.13635	0.335385	no
ENSMUSG00000017167.6	ENSMUSG00000017167.6	Cntnap1	chr11:101162678-101190724	WT_U	WT_D	OK	6.50907	6.99782	0.104454	-0.355673	0.58775	0.821368	no
ENSMUSG00000017176.17	ENSMUSG00000017176.17	Nt5c3b	chr11:100415696-100441808	WT_U	WT_D	OK	59.1672	55.7379	-0.086139	0.395295	0.56105	0.803982	no
ENSMUSG00000017188.3	ENSMUSG00000017188.3	Coa3	chr11:101277967-101302286	WT_U	WT_D	OK	38.3277	37.2233	-0.0421815	0.0874072	0.89895	0.965187	no
ENSMUSG00000017210.14	ENSMUSG00000017210.14	Med24	chr11:98704590-98729435	WT_U	WT_D	OK	33.855	31.8151	-0.0896573	0.356441	0.54795	0.79447	no
ENSMUSG00000017221.14	ENSMUSG00000017221.14	Psmd3	chr11:98682553-98695979	WT_U	WT_D	OK	114.191	100.439	-0.185129	1.07362	0.1191	0.305549	no
ENSMUSG00000017264.16	ENSMUSG00000017264.16	Exosc10	chr4:148558428-148582401	WT_U	WT_D	OK	62.6252	60.746	-0.0439539	0.209795	0.72735	0.902175	no
ENSMUSG00000017286.15	ENSMUSG00000017286.15	Glod4	chr11:76046225-76250619	WT_U	WT_D	OK	29.5671	32.462	0.134759	-0.286591	0.6329	0.84942	no
ENSMUSG00000017288.15	ENSMUSG00000017288.15	Vps53	chr11:76046225-76250619	WT_U	WT_D	OK	23.1816	24.0462	0.0528288	-0.132089	0.828	0.942969	no
ENSMUSG00000017291.13	ENSMUSG00000017291.13	Taok1	chr11:77508098-77607815	WT_U	WT_D	OK	19.6212	20.028	0.0296051	-0.169421	0.80715	0.935352	no
ENSMUSG00000017299.13	ENSMUSG00000017299.13	Dnttip1	chr2:164745982-164769666	WT_U	WT_D	OK	23.0928	25.0868	0.119485	-0.526769	0.4415	0.707178	no
ENSMUSG00000017307.15	ENSMUSG00000017307.15	Acot8	chr2:164785822-164804882	WT_U	WT_D	OK	10.9303	11.3488	0.0542068	-0.131175	0.8527	0.951099	no
ENSMUSG00000017309.11	ENSMUSG00000017309.11	Cd300lg	chr11:102041508-102055620	WT_U	WT_D	OK	0.0961182	0.0281423	-1.77207	1.9268	0.0028	0.0158161	yes
ENSMUSG00000017311.15	ENSMUSG00000017311.15	Pyy	chr11:102106675-102107832	WT_U	WT_D	OK	0.106631	0.391535	1.87651	-1.92718	0.00985	0.0449009	yes
ENSMUSG00000017314.12	ENSMUSG00000017314.12	Mpp2	chr11:102057014-102088515	WT_U	WT_D	OK	12.9441	8.95588	-0.531388	1.88109	0.0006	0.00423598	yes
ENSMUSG00000017316.13	ENSMUSG00000017316.13	Ppy	chr11:102099929-102101319	WT_U	WT_D	OK	0.104268	0.291372	1.48257	-1.56121	0.0463	0.152119	no
ENSMUSG00000017344.4	ENSMUSG00000017344.4	Vtn	chr11:78499090-78502324	WT_U	WT_D	OK	0.106162	0.0444677	-1.25544	1.0429	0.0561	0.175869	no
ENSMUSG00000017376.15	ENSMUSG00000017376.15	Nlk	chr11:78567167-78697373	WT_U	WT_D	OK	14.018	16.5485	0.23942	-1.21243	0.05905	0.182789	no
ENSMUSG00000017386.10	ENSMUSG00000017386.10	Traf4	chr11:78158498-78165589	WT_U	WT_D	OK	55.4607	48.7238	-0.186839	1.04714	0.1337	0.330718	no
ENSMUSG00000017390.15	ENSMUSG00000017390.15	Aldoc	chr11:78322967-78327781	WT_U	WT_D	OK	3.88545	2.33922	-0.732054	2.92198	5e-05	0.00046241	yes
ENSMUSG00000017400.10	ENSMUSG00000017400.10	Stac2	chr11:98036622-98053462	WT_U	WT_D	OK	6.68347	5.61876	-0.250346	1.18296	0.07725	0.223031	no
ENSMUSG00000017404.12	ENSMUSG00000017404.12	Rpl19	chr11:98001507-98030492	WT_U	WT_D	OK	1726.03	1727.24	0.00101102	-0.00571044	0.99375	0.996854	no
ENSMUSG00000017405.14	ENSMUSG00000017405.14	Nek8	chr11:78166105-78176675	WT_U	WT_D	OK	2.82266	2.66388	-0.0835263	0.271465	0.6947	0.885431	no
ENSMUSG00000017412.15	ENSMUSG00000017412.15	Cacnb4	chr2:52425011-52676831	WT_U	WT_D	OK	0.0846074	0.00998517	-3.08292	0.485883	0.10045	0.269944	no
ENSMUSG00000017417.14	ENSMUSG00000017417.14	Plxdc1	chr11:97923237-97986444	WT_U	WT_D	OK	0.362926	0.331603	-0.130218	0.405027	0.54845	0.794884	no
ENSMUSG00000017418.13	ENSMUSG00000017418.13	Arl5b	chr2:14995130-15082456	WT_U	WT_D	OK	18.2667	18.614	0.0271721	-0.098019	0.88375	0.960917	no
ENSMUSG00000017421.18	ENSMUSG00000017421.18	Zfp207	chr11:80383278-80405733	WT_U	WT_D	OK	106.675	105.44	-0.0167998	0.0936274	0.89275	0.963434	no
ENSMUSG00000017428.16	ENSMUSG00000017428.16	Psmd11	chr11:80428614-80473248	WT_U	WT_D	OK	79.4684	89.2595	0.167624	-0.808251	0.237	0.483975	no
ENSMUSG00000017446.14	ENSMUSG00000017446.14	C1qtnf1	chr11:118428202-118454995	WT_U	WT_D	OK	0.510932	0.40491	-0.33553	0.639538	0.22695	0.471016	no
ENSMUSG00000017453.4	ENSMUSG00000017453.4	Pipox	chr11:77880614-77894096	WT_U	WT_D	OK	1.94439	2.92563	0.58943	-2.11499	0.00205	0.0121387	yes
ENSMUSG00000017466.9	ENSMUSG00000017466.9	Timp2	chr11:118301068-118355740	WT_U	WT_D	OK	12.7087	9.31628	-0.447991	1.46047	0.037	0.128069	no
ENSMUSG00000017485.10	ENSMUSG00000017485.10	Top2b	chr14:16365178-16430787	WT_U	WT_D	OK	62.9126	68.6953	0.126862	-0.386202	0.56875	0.809424	no
ENSMUSG00000017491.8	ENSMUSG00000017491.8	Rarb	chr14:16430841-16575472	WT_U	WT_D	OK	0.0289955	0.103804	1.83996	-3.1133	0.0003	0.00231843	yes
ENSMUSG00000017493.12	ENSMUSG00000017493.12	Igfbp4	chr11:99041243-99054392	WT_U	WT_D	OK	117.06	136.041	0.216793	-0.785268	0.256	0.507336	no
ENSMUSG00000017499.15	ENSMUSG00000017499.15	Cdc6	chr11:98907800-98923940	WT_U	WT_D	OK	25.1757	21.285	-0.242195	1.33964	0.05305	0.168623	no
ENSMUSG00000017548.15	ENSMUSG00000017548.15	Suz12	chr11:79993105-80034123	WT_U	WT_D	OK	32.811	29.2987	-0.163343	0.829894	0.18915	0.419039	no
ENSMUSG00000017550.14	ENSMUSG00000017550.14	Atad5	chr11:80089399-80135794	WT_U	WT_D	OK	10.2813	9.92309	-0.0511614	0.252018	0.6779	0.875715	no
ENSMUSG00000017561.16	ENSMUSG00000017561.16	Crlf3	chr11:80046492-80080991	WT_U	WT_D	OK	19.8071	15.104	-0.391087	1.64704	0.00985	0.0449009	yes
ENSMUSG00000017615.12	ENSMUSG00000017615.12	Tnfaip1	chr11:78522849-78536332	WT_U	WT_D	OK	28.0459	26.3385	-0.0906167	0.532346	0.44065	0.70646	no
ENSMUSG00000017631.18	ENSMUSG00000017631.18	Abr	chr11:76416733-76622314	WT_U	WT_D	OK	23.2682	21.3315	-0.125374	0.459534	0.4762	0.736685	no
ENSMUSG00000017639.13	ENSMUSG00000017639.13	Rab11fip4	chr11:79591211-79698023	WT_U	WT_D	OK	1.1548	1.06156	-0.121457	0.504294	0.4285	0.69581	no
ENSMUSG00000017652.16	ENSMUSG00000017652.16	Cd40	chr2:165055626-165072948	WT_U	WT_D	OK	5.29392	5.81638	0.135785	-0.494019	0.46825	0.730192	no
ENSMUSG00000017664.16	ENSMUSG00000017664.16	Slc35c2	chr2:165276553-165287869	WT_U	WT_D	OK	23.2292	23.4798	0.0154807	-0.073302	0.91605	0.970465	no
ENSMUSG00000017667.9	ENSMUSG00000017667.9	Zfp334	chr2:165374263-165388259	WT_U	WT_D	OK	4.3095	4.24036	-0.0233337	0.118784	0.86525	0.955166	no
ENSMUSG00000017670.16	ENSMUSG00000017670.16	Elmo2	chr2:165288030-165326479	WT_U	WT_D	OK	14.1755	13.8788	-0.0305168	0.124442	0.83475	0.945198	no
ENSMUSG00000017677.11	ENSMUSG00000017677.11	Wsb1	chr11:79239371-79254671	WT_U	WT_D	OK	62.4677	57.0749	-0.130254	0.661314	0.3467	0.613511	no
ENSMUSG00000017679.16	ENSMUSG00000017679.16	Ttpal	chr2:163602313-163619013	WT_U	WT_D	OK	8.78996	10.6646	0.278901	-0.678768	0.1935	0.425562	no
ENSMUSG00000017686.16	ENSMUSG00000017686.16	Rhot1	chr11:80209018-80267907	WT_U	WT_D	OK	26.2599	25.2818	-0.0547622	0.307667	0.65615	0.863301	no
ENSMUSG00000017692.8	ENSMUSG00000017692.8	Rhbdl3	chr11:80300911-80355955	WT_U	WT_D	OK	0.249457	0.497995	0.99734	-3.08566	5e-05	0.00046241	yes
ENSMUSG00000017697.3	ENSMUSG00000017697.3	Ada	chr2:163726583-163750239	WT_U	WT_D	OK	5.01663	4.71805	-0.0885278	0.416086	0.55245	0.797693	no
ENSMUSG00000017707.9	ENSMUSG00000017707.9	Serinc3	chr2:163623271-163645801	WT_U	WT_D	OK	28.0097	36.1936	0.369808	-2.07249	0.0023	0.0133873	yes
ENSMUSG00000017713.9	ENSMUSG00000017713.9	Tha1	chr11:117867951-117887416	WT_U	WT_D	OK	3.65988	4.97377	0.442543	-1.77012	0.01285	0.0556543	no
ENSMUSG00000017715.11	ENSMUSG00000017715.11	Pgs1	chr11:117986291-118129219	WT_U	WT_D	OK	34.6156	32.5119	-0.0904545	0.510377	0.4603	0.723788	no
ENSMUSG00000017716.15	ENSMUSG00000017716.15	Birc5	chr11:117849250-117855743	WT_U	WT_D	OK	178.789	146.416	-0.288185	1.5953	0.0218	0.0847595	no
ENSMUSG00000017718.15	ENSMUSG00000017718.15	Afmid	chr11:117809667-117839908	WT_U	WT_D	OK	1.45335	1.55163	0.0944024	-0.0661322	0.8883	0.96201	no
ENSMUSG00000017721.15	ENSMUSG00000017721.15	Pigt	chr2:164497519-164508301	WT_U	WT_D	OK	55.6958	57.2471	0.0396341	-0.228528	0.74345	0.909041	no
ENSMUSG00000017724.14	ENSMUSG00000017724.14	Etv4	chr11:101769741-101785371	WT_U	WT_D	OK	108.173	95.8765	-0.174091	0.711397	0.307	0.568721	no
ENSMUSG00000017734.15	ENSMUSG00000017734.15	Dbndd2	chr2:164456963-164493319	WT_U	WT_D	OK	12.9236	11.6835	-0.145535	0.415333	0.5547	0.799479	no
ENSMUSG00000017737.2	ENSMUSG00000017737.2	Mmp9	chr2:164940779-164955850	WT_U	WT_D	OK	0.32035	0.321987	0.00735345	-0.0151379	0.9783	0.990189	no
ENSMUSG00000017740.16	ENSMUSG00000017740.16	Slc12a5	chr2:164960801-164999731	WT_U	WT_D	OK	2.37246	2.23116	-0.0885898	0.287719	0.64585	0.857235	no
ENSMUSG00000017747.13	ENSMUSG00000017747.13	Ghdc	chr11:100766031-100770957	WT_U	WT_D	OK	15.6827	16.3658	0.0615102	-0.201453	0.7674	0.919447	no
ENSMUSG00000017754.13	ENSMUSG00000017754.13	Pltp	chr2:164830731-164857711	WT_U	WT_D	OK	6.13697	5.39557	-0.185751	0.299756	0.6354	0.851008	no
ENSMUSG00000017756.8	ENSMUSG00000017756.8	Slc12a7	chr13:73763696-73816743	WT_U	WT_D	OK	3.07073	2.70505	-0.182926	0.903601	0.19405	0.42635	no
ENSMUSG00000017760.15	ENSMUSG00000017760.15	Ctsa	chr2:164830731-164857711	WT_U	WT_D	OK	48.568	55.8835	0.202416	-0.817148	0.2084	0.446759	no
ENSMUSG00000017764.2	ENSMUSG00000017764.2	Zswim1	chr2:164822685-164828537	WT_U	WT_D	OK	8.22568	7.70066	-0.0951528	0.389123	0.5773	0.814696	no
ENSMUSG00000017765.16	ENSMUSG00000017765.16	Slc12a4	chr8:105934332-105966115	WT_U	WT_D	OK	19.1608	18.5487	-0.0468397	0.134139	0.84435	0.948454	no
ENSMUSG00000017774.19	ENSMUSG00000017774.19	Myo1c	chr11:75650503-75673910	WT_U	WT_D	OK	18.544	15.4623	-0.262198	1.32399	0.0357	0.124685	no
ENSMUSG00000017776.15	ENSMUSG00000017776.15	Crk	chr11:75679258-75706908	WT_U	WT_D	OK	47.4321	51.6557	0.123064	-0.506037	0.46275	0.725625	no
ENSMUSG00000017778.14	ENSMUSG00000017778.14	Cox7c	chr13:86044815-86046904	WT_U	WT_D	OK	288.538	306.15	0.0854774	-0.474179	0.49375	0.751817	no
ENSMUSG00000017781.17	ENSMUSG00000017781.17	Pitpna	chr11:75588096-75628804	WT_U	WT_D	OK	86.8225	76.6538	-0.179712	0.960925	0.16725	0.385569	no
ENSMUSG00000017801.15	ENSMUSG00000017801.15	Mlx	chr11:101087276-101095436	WT_U	WT_D	OK	36.1427	34.7366	-0.0572477	0.211288	0.7575	0.915285	no
ENSMUSG00000017802.14	ENSMUSG00000017802.14	Fam134c	chr11:101096321-101119893	WT_U	WT_D	OK	20.6097	21.6275	0.0695434	-0.389705	0.57385	0.812654	no
ENSMUSG00000017817.11	ENSMUSG00000017817.11	Jph2	chr2:163336241-163397993	WT_U	WT_D	OK	0.199622	0.214306	0.102402	-0.335478	0.6291	0.847248	no
ENSMUSG00000017830.15	ENSMUSG00000017830.15	Dhx58	chr11:100574903-100704271	WT_U	WT_D	OK	1.08644	1.02335	-0.0863089	0.0242643	0.9438	0.979218	no
ENSMUSG00000017831.7	ENSMUSG00000017831.7	Rab5a	chr17:53479233-53539451	WT_U	WT_D	OK	31.8467	34.5746	0.118569	-0.690728	0.31725	0.580264	no
ENSMUSG00000017832.2	ENSMUSG00000017832.2	Hspb9	chr11:100713849-100714575	WT_U	WT_D	OK	0.505956	0.43152	-0.229585	0.461798	0.50475	0.7608	no
ENSMUSG00000017837.12	ENSMUSG00000017837.12	Nkiras2	chr11:100574903-100704271	WT_U	WT_D	OK	30.0429	32.1407	0.0973773	-0.216025	0.74805	0.910947	no
ENSMUSG00000017843.13	ENSMUSG00000017843.13	Ppp2r5c	chr12:110485738-110583061	WT_U	WT_D	OK	17.6101	17.4986	-0.0091636	0.053929	0.9431	0.978968	no
ENSMUSG00000017858.12	ENSMUSG00000017858.12	Ift52	chr2:163017353-163046141	WT_U	WT_D	OK	30.7353	29.036	-0.0820538	0.340633	0.61415	0.838428	no
ENSMUSG00000017861.11	ENSMUSG00000017861.11	Mybl2	chr2:163054686-163084688	WT_U	WT_D	OK	34.9708	27.5179	-0.34578	1.31062	0.0561	0.175869	no
ENSMUSG00000017897.18	ENSMUSG00000017897.18	Eya2	chr2:165595031-165771727	WT_U	WT_D	OK	0.24341	0.150331	-0.695246	0.565856	0.35945	0.627189	no
ENSMUSG00000017929.13	ENSMUSG00000017929.13	B4galt5	chr2:167298443-167349183	WT_U	WT_D	OK	27.0597	30.2505	0.160813	-0.349682	0.61335	0.838021	no
ENSMUSG00000017943.15	ENSMUSG00000017943.15	Gdap1l1	chr2:163438475-163455324	WT_U	WT_D	OK	68.4367	78.7106	0.201788	-1.00779	0.1479	0.354857	no
ENSMUSG00000017969.13	ENSMUSG00000017969.13	Ptgis	chr2:167103377-167240604	WT_U	WT_D	OK	1.80971	1.75703	-0.0426197	0.0688663	0.91965	0.971679	no
ENSMUSG00000017999.16	ENSMUSG00000017999.16	Ddx27	chr2:167015192-167034947	WT_U	WT_D	OK	77.1945	72.6515	-0.0875055	0.456691	0.5022	0.758577	no
ENSMUSG00000018001.18	ENSMUSG00000018001.18	Cyth3	chr5:143622446-143710250	WT_U	WT_D	OK	85.3654	101.624	0.251518	-0.69973	0.27	0.52451	no
ENSMUSG00000018008.7	ENSMUSG00000018008.7	Cyth4	chr15:78597046-78622019	WT_U	WT_D	OK	0.302547	0.377518	0.319386	-1.06615	0.131	0.326157	no
ENSMUSG00000018012.11	ENSMUSG00000018012.11	Rac3	chr11:120721469-120723969	WT_U	WT_D	OK	2.39365	2.67224	0.158837	-0.573823	0.4164	0.684538	no
ENSMUSG00000018040.9	ENSMUSG00000018040.9	Rrp7a	chr15:83089505-83122801	WT_U	WT_D	OK	53.6502	52.0035	-0.0449748	0.139798	0.8345	0.945076	no
ENSMUSG00000018042.17	ENSMUSG00000018042.17	Cyb5r3	chr15:83153493-83172592	WT_U	WT_D	OK	158.581	149.819	-0.0819993	0.478567	0.48725	0.746449	no
ENSMUSG00000018068.13	ENSMUSG00000018068.13	Ints2	chr11:86201369-86357602	WT_U	WT_D	OK	18.7621	19.7304	0.0725989	-0.0919963	0.7831	0.926229	no
ENSMUSG00000018076.12	ENSMUSG00000018076.12	Med13l	chr5:118560678-118765438	WT_U	WT_D	OK	7.26795	8.51501	0.22846	-1.24418	0.05765	0.179593	no
ENSMUSG00000018102.4	ENSMUSG00000018102.4	Hist1h2bc	chr13:23684198-23692488	WT_U	WT_D	OK	26.3343	6.86292	-1.94005	9.00932	5e-05	0.00046241	yes
ENSMUSG00000018126.15	ENSMUSG00000018126.15	Baiap2l2	chr15:79258194-79285537	WT_U	WT_D	OK	0.333077	0.281016	-0.245203	0.366581	0.49165	0.75007	no
ENSMUSG00000018143.10	ENSMUSG00000018143.10	Mafk	chr5:139791512-139826885	WT_U	WT_D	OK	10.361	9.63929	-0.104164	0.409842	0.5451	0.792149	no
ENSMUSG00000018160.15	ENSMUSG00000018160.15	Med1	chr11:98152153-98193293	WT_U	WT_D	OK	25.492	23.2447	-0.133143	0.372594	0.5665	0.808049	no
ENSMUSG00000018166.8	ENSMUSG00000018166.8	Erbb3	chr10:128567522-128589652	WT_U	WT_D	OK	1.59851	1.98157	0.309916	-1.50302	0.0292	0.106544	no
ENSMUSG00000018167.10	ENSMUSG00000018167.10	Stard3	chr11:98358367-98381112	WT_U	WT_D	OK	9.238	8.3948	-0.138085	0.57073	0.4185	0.686481	no
ENSMUSG00000018169.12	ENSMUSG00000018169.12	Mfng	chr15:78755881-78773475	WT_U	WT_D	OK	2.4178	1.96738	-0.297419	1.23292	0.0765	0.221446	no
ENSMUSG00000018171.9	ENSMUSG00000018171.9	Vmp1	chr11:86583864-86683836	WT_U	WT_D	OK	51.7105	53.6072	0.0519695	-0.166474	0.80975	0.936171	no
ENSMUSG00000018189.12	ENSMUSG00000018189.12	Uchl5	chr1:143777271-143807466	WT_U	WT_D	OK	85.9472	67.877	-0.340528	1.76298	0.01175	0.0518174	no
ENSMUSG00000018196.18	ENSMUSG00000018196.18	Glrx2	chr1:143716337-143749676	WT_U	WT_D	OK	56.2786	58.0378	0.0444064	-0.174381	0.8007	0.932949	no
ENSMUSG00000018199.8	ENSMUSG00000018199.8	Trove2	chr1:143750789-143777068	WT_U	WT_D	OK	10.5007	11.3157	0.10784	-0.617468	0.38235	0.651368	no
ENSMUSG00000018209.15	ENSMUSG00000018209.15	Stk4	chr2:164053539-164155524	WT_U	WT_D	OK	26.341	23.6203	-0.157283	0.469607	0.49065	0.749275	no
ENSMUSG00000018217.12	ENSMUSG00000018217.12	Pmp22	chr11:63128981-63159547	WT_U	WT_D	OK	78.3243	37.4056	-1.06621	6.03787	5e-05	0.00046241	yes
ENSMUSG00000018238.6	ENSMUSG00000018238.6	Gdf9	chr11:53431022-53437904	WT_U	WT_D	OK	0.498892	0.460918	-0.114217	0.22281	0.73765	0.906808	no
ENSMUSG00000018239.9	ENSMUSG00000018239.9	Zcchc10	chr11:53324678-53333301	WT_U	WT_D	OK	21.4508	21.7756	0.021681	-0.105906	0.87225	0.957524	no
ENSMUSG00000018286.6	ENSMUSG00000018286.6	Psmb6	chr11:70525366-70527858	WT_U	WT_D	OK	234.801	245.173	0.0623616	-0.363932	0.5996	0.82907	no
ENSMUSG00000018287.12	ENSMUSG00000018287.12	Spag7	chr11:70663770-70669416	WT_U	WT_D	OK	129.7	112.283	-0.208039	1.04858	0.13245	0.328624	no
ENSMUSG00000018293.4	ENSMUSG00000018293.4	Pfn1	chr11:70651849-70654644	WT_U	WT_D	OK	558.332	468.82	-0.252089	1.45679	0.0379	0.130329	no
ENSMUSG00000018322.10	ENSMUSG00000018322.10	Tomm34	chr2:164053539-164155524	WT_U	WT_D	OK	29.8239	25.6878	-0.215386	0.710391	0.3109	0.573085	no
ENSMUSG00000018326.9	ENSMUSG00000018326.9	Ywhab	chr2:163994959-164018588	WT_U	WT_D	OK	102.014	92.9848	-0.1337	0.76139	0.26415	0.51752	no
ENSMUSG00000018334.16	ENSMUSG00000018334.16	Ksr1	chr11:79013439-79146407	WT_U	WT_D	OK	2.91236	2.61933	-0.152991	0.746546	0.27985	0.536119	no
ENSMUSG00000018339.11	ENSMUSG00000018339.11	Gpx3	chr11:54902452-54910377	WT_U	WT_D	OK	0.0871094	0.104495	0.262534	-0.367696	0.5483	0.794736	no
ENSMUSG00000018340.13	ENSMUSG00000018340.13	Anxa6	chr11:54979107-55033445	WT_U	WT_D	OK	119.756	72.0298	-0.733432	4.28289	5e-05	0.00046241	yes
ENSMUSG00000018347.16	ENSMUSG00000018347.16	Zkscan6	chr11:65807174-65829239	WT_U	WT_D	OK	4.63595	5.13784	0.148297	-0.720221	0.3033	0.564623	no
ENSMUSG00000018362.14	ENSMUSG00000018362.14	Kpna2	chr11:106988628-106999541	WT_U	WT_D	OK	190.143	190.386	0.00184257	-0.0101504	0.98695	0.993684	no
ENSMUSG00000018363.16	ENSMUSG00000018363.16	Smurf2	chr11:106820065-106920761	WT_U	WT_D	OK	21.4235	20.8515	-0.039043	0.194337	0.76385	0.91786	no
ENSMUSG00000018372.13	ENSMUSG00000018372.13	Cep95	chr11:106789251-106819930	WT_U	WT_D	OK	17.8123	17.8203	0.000647809	-0.00206703	0.99685	0.998285	no
ENSMUSG00000018377.10	ENSMUSG00000018377.10	Vezf1	chr11:88068278-88084729	WT_U	WT_D	OK	36.8087	37.2303	0.0164304	-0.0960301	0.8899	0.962746	no
ENSMUSG00000018378.13	ENSMUSG00000018378.13	Cuedc1	chr11:88098057-88194140	WT_U	WT_D	OK	17.0089	21.2297	0.319794	-1.5339	0.01935	0.0772327	no
ENSMUSG00000018379.17	ENSMUSG00000018379.17	Srsf1	chr11:88011990-88053755	WT_U	WT_D	OK	289.303	275.583	-0.0700944	0.296703	0.67065	0.871914	no
ENSMUSG00000018381.15	ENSMUSG00000018381.15	Abi3	chr11:95700105-95845734	WT_U	WT_D	OK	0.333941	0.194545	-0.779489	0.232748	0.54855	0.794903	no
ENSMUSG00000018387.12	ENSMUSG00000018387.12	Shroom1	chr11:53457204-53467766	WT_U	WT_D	OK	0.995213	1.42497	0.517854	-2.06586	0.002	0.0118982	yes
ENSMUSG00000018395.19	ENSMUSG00000018395.19	Kif3a	chr11:53567378-53601967	WT_U	WT_D	OK	38.0395	47.2758	0.313604	-1.75697	0.01085	0.0486036	yes
ENSMUSG00000018398.18	ENSMUSG00000018398.18	Sept8	chr11:53519256-53549565	WT_U	WT_D	OK	38.9478	43.0086	0.143083	-0.7463	0.28015	0.536417	no
ENSMUSG00000018401.17	ENSMUSG00000018401.17	Mtmr4	chr11:87592161-87616302	WT_U	WT_D	OK	11.7787	11.4526	-0.0405052	0.149828	0.8224	0.940633	no
ENSMUSG00000018405.7	ENSMUSG00000018405.7	Mrm1	chr11:84813060-84819515	WT_U	WT_D	OK	9.56704	10.2588	0.100717	-0.219424	0.5271	0.778444	no
ENSMUSG00000018411.17	ENSMUSG00000018411.17	Mapt	chr11:104231389-104332090	WT_U	WT_D	OK	65.8598	60.6464	-0.118976	0.320025	0.61865	0.840837	no
ENSMUSG00000018412.16	ENSMUSG00000018412.16	Kansl1	chr11:104333228-104468861	WT_U	WT_D	OK	26.0933	30.493	0.224799	-1.01398	0.1327	0.329016	no
ENSMUSG00000018415.14	ENSMUSG00000018415.14	Gid4	chr11:60400625-60450927	WT_U	WT_D	OK	10.923	12.0546	0.142215	-0.643279	0.35595	0.623275	no
ENSMUSG00000018417.14	ENSMUSG00000018417.14	Myo1b	chr1:51749764-51916071	WT_U	WT_D	OK	28.8036	27.514	-0.0660832	0.291654	0.61125	0.836704	no
ENSMUSG00000018425.18	ENSMUSG00000018425.18	Dhx40	chr11:86768845-86807746	WT_U	WT_D	OK	17.7205	17.6772	-0.00352954	0.0195289	0.97855	0.990262	no
ENSMUSG00000018427.7	ENSMUSG00000018427.7	Ypel2	chr11:86936424-86993707	WT_U	WT_D	OK	1.50974	2.27018	0.588507	-2.81457	5e-05	0.00046241	yes
ENSMUSG00000018428.15	ENSMUSG00000018428.15	Akap1	chr11:88830791-88881395	WT_U	WT_D	OK	25.1232	24.5672	-0.0322868	0.172666	0.7992	0.932459	no
ENSMUSG00000018433.14	ENSMUSG00000018433.14	Nol11	chr11:107157407-107189381	WT_U	WT_D	OK	41.948	40.731	-0.0424748	0.238324	0.72155	0.899386	no
ENSMUSG00000018442.13	ENSMUSG00000018442.13	Derl2	chr11:71007163-71027371	WT_U	WT_D	OK	21.3883	22.4571	0.0703498	-0.18011	0.7892	0.928533	no
ENSMUSG00000018446.8	ENSMUSG00000018446.8	C1qbp	chr11:70977835-70983026	WT_U	WT_D	OK	205.182	201.47	-0.0263391	0.153844	0.8258	0.942062	no
ENSMUSG00000018449.12	ENSMUSG00000018449.12	Rpain	chr11:70970212-70977833	WT_U	WT_D	OK	19.7178	18.6995	-0.0764989	0.28592	0.68	0.877093	no
ENSMUSG00000018451.6	ENSMUSG00000018451.6	6330403K07Rik	chr11:71031940-71033513	WT_U	WT_D	OK	4.47918	5.09615	0.186173	-0.867726	0.21585	0.456817	no
ENSMUSG00000018470.8	ENSMUSG00000018470.8	Kcnab3	chr11:69326257-69333042	WT_U	WT_D	OK	1.71226	1.04344	-0.714554	2.78944	5e-05	0.00046241	yes
ENSMUSG00000018474.17	ENSMUSG00000018474.17	Chd3	chr11:69343272-69369408	WT_U	WT_D	OK	49.1759	42.814	-0.199869	0.433379	0.52685	0.778282	no
ENSMUSG00000018476.7	ENSMUSG00000018476.7	Kdm6b	chr11:69398507-69413675	WT_U	WT_D	OK	25.3127	33.4172	0.400729	-1.88754	0.0028	0.0158161	yes
ENSMUSG00000018479.12	ENSMUSG00000018479.12	1700125H20Rik	chr11:85170403-85181145	WT_U	WT_D	OK	0.0699938	0.100871	0.527212	-0.504217	0.44435	0.709588	no
ENSMUSG00000018481.9	ENSMUSG00000018481.9	Appbp2	chr11:85187261-85238304	WT_U	WT_D	OK	19.1869	19.364	0.0132554	-0.0774509	0.9117	0.969166	no
ENSMUSG00000018501.17	ENSMUSG00000018501.17	Ncor1	chr11:62281472-62514417	WT_U	WT_D	OK	122.629	133.605	0.123674	-0.396723	0.5665	0.808049	no
ENSMUSG00000018507.16	ENSMUSG00000018507.16	Trpv2	chr11:62574485-62600515	WT_U	WT_D	OK	12.854	13.1838	0.0365489	-0.163089	0.81645	0.938768	no
ENSMUSG00000018509.8	ENSMUSG00000018509.8	Cenpv	chr11:62524945-62539261	WT_U	WT_D	OK	57.7277	62.2794	0.109491	-0.553936	0.42675	0.694228	no
ENSMUSG00000018537.16	ENSMUSG00000018537.16	Pcgf2	chr11:97688822-97700497	WT_U	WT_D	OK	31.4957	31.9484	0.0205888	-0.0992371	0.8838	0.960917	no
ENSMUSG00000018541.10	ENSMUSG00000018541.10	Cwc25	chr11:97745480-97766556	WT_U	WT_D	OK	11.5722	11.5786	0.000797661	-0.00390149	0.9948	0.997398	no
ENSMUSG00000018543.8	ENSMUSG00000018543.8	1700001P01Rik	chr11:97771480-97775918	WT_U	WT_D	OK	1.27465	0.898725	-0.50415	1.37135	0.05275	0.167947	no
ENSMUSG00000018547.8	ENSMUSG00000018547.8	Pip4k2b	chr11:97715156-97744704	WT_U	WT_D	OK	17.7606	16.73	-0.0862429	0.483784	0.4696	0.731262	no
ENSMUSG00000018548.15	ENSMUSG00000018548.15	Trim37	chr11:87127076-87220683	WT_U	WT_D	OK	32.2818	32.3706	0.00396308	-0.0174016	0.9796	0.990764	no
ENSMUSG00000018554.13	ENSMUSG00000018554.13	Ybx2	chr11:69935795-69941605	WT_U	WT_D	OK	0.09568	0.56955	2.57353	-3.59999	5e-05	0.00046241	yes
ENSMUSG00000018559.16	ENSMUSG00000018559.16	Ctdnep1	chr11:69968221-69990601	WT_U	WT_D	OK	40.669	40.2146	-0.0162101	0.0542159	0.94125	0.978345	no
ENSMUSG00000018565.17	ENSMUSG00000018565.17	Elp5	chr11:69968221-69990601	WT_U	WT_D	OK	36.9422	39.5118	0.0970138	-0.380128	0.57335	0.812336	no
ENSMUSG00000018566.14	ENSMUSG00000018566.14	Slc2a4	chr11:69942538-69948188	WT_U	WT_D	OK	0.202725	0.0822368	-1.30167	1.23838	0.02445	0.0928259	no
ENSMUSG00000018567.14	ENSMUSG00000018567.14	Gabarap	chr11:69991142-69994951	WT_U	WT_D	OK	81.7252	88.5604	0.115881	-0.632427	0.36655	0.634824	no
ENSMUSG00000018570.17	ENSMUSG00000018570.17	2810408A11Rik	chr11:69897351-69900987	WT_U	WT_D	OK	1.67489	2.67558	0.675785	-2.1049	0.0028	0.0158161	yes
ENSMUSG00000018572.10	ENSMUSG00000018572.10	Phf23	chr11:69995776-70000009	WT_U	WT_D	OK	40.0684	38.245	-0.0671938	0.355178	0.60485	0.832584	no
ENSMUSG00000018574.14	ENSMUSG00000018574.14	Acadvl	chr11:70000594-70015411	WT_U	WT_D	OK	18.6115	17.7737	-0.0664503	0.230964	0.7214	0.899315	no
ENSMUSG00000018583.5	ENSMUSG00000018583.5	G3bp1	chr11:55469684-55504838	WT_U	WT_D	OK	66.5177	62.0235	-0.100923	0.357687	0.56665	0.808112	no
ENSMUSG00000018585.9	ENSMUSG00000018585.9	Atox1	chr11:55446640-55461239	WT_U	WT_D	OK	85.8327	68.0897	-0.334091	1.68399	0.0155	0.0647524	no
ENSMUSG00000018593.12	ENSMUSG00000018593.12	Sparc	chr11:55394499-55420080	WT_U	WT_D	OK	76.5447	30.3888	-1.33276	7.75725	5e-05	0.00046241	yes
ENSMUSG00000018599.5	ENSMUSG00000018599.5	Mief2	chr11:60728397-60732951	WT_U	WT_D	OK	7.45964	6.51293	-0.195799	0.585769	0.3868	0.655705	no
ENSMUSG00000018604.18	ENSMUSG00000018604.18	Tbx3	chr5:119570129-119684724	WT_U	WT_D	OK	0.0810337	0.0367783	-1.13967	0.834602	0.1135	0.295158	no
ENSMUSG00000018634.10	ENSMUSG00000018634.10	Crhr1	chr11:104132854-104175523	WT_U	WT_D	OK	3.3156	1.92022	-0.787998	3.63487	5e-05	0.00046241	yes
ENSMUSG00000018648.15	ENSMUSG00000018648.15	Dusp14	chr11:84048040-84069261	WT_U	WT_D	OK	1.09715	1.34195	0.29057	-1.08433	0.116	0.299939	no
ENSMUSG00000018651.14	ENSMUSG00000018651.14	Tada2a	chr11:84078919-84129600	WT_U	WT_D	OK	21.293	20.1728	-0.0779679	0.343121	0.6098	0.835746	no
ENSMUSG00000018659.12	ENSMUSG00000018659.12	Pnpo	chr11:96907425-96982959	WT_U	WT_D	OK	7.73031	7.52456	-0.038919	0.0666258	0.9222	0.97259	no
ENSMUSG00000018661.17	ENSMUSG00000018661.17	Cog1	chr11:113244852-113684155	WT_U	WT_D	OK	19.5419	20.6983	0.0829415	-0.244855	0.6728	0.872885	no
ENSMUSG00000018666.13	ENSMUSG00000018666.13	Cbx1	chr11:96789126-96808640	WT_U	WT_D	OK	128.315	127.417	-0.0101321	0.0555581	0.9385	0.977689	no
ENSMUSG00000018669.14	ENSMUSG00000018669.14	Cdk5rap3	chr11:96907425-96982959	WT_U	WT_D	OK	65.1924	69.9844	0.10233	-0.398809	0.5507	0.796394	no
ENSMUSG00000018672.15	ENSMUSG00000018672.15	Copz2	chr11:96849869-96861203	WT_U	WT_D	OK	12.5589	6.41853	-0.968395	4.50144	5e-05	0.00046241	yes
ENSMUSG00000018677.9	ENSMUSG00000018677.9	Slc25a39	chr11:102402984-102407946	WT_U	WT_D	OK	108.257	130.19	0.266158	-1.36677	0.0496	0.16025	no
ENSMUSG00000018678.12	ENSMUSG00000018678.12	Sp2	chr11:96907425-96982959	WT_U	WT_D	OK	12.3736	12.363	-0.00123643	0.00333594	0.99585	0.997872	no
ENSMUSG00000018697.14	ENSMUSG00000018697.14	Aatf	chr11:84422854-84513522	WT_U	WT_D	OK	64.4423	66.3567	0.0422342	-0.244371	0.72315	0.900097	no
ENSMUSG00000018698.15	ENSMUSG00000018698.15	Lhx1	chr11:84518283-84525535	WT_U	WT_D	OK	6.09822	4.99456	-0.288031	1.08173	0.0825	0.233994	no
ENSMUSG00000018707.13	ENSMUSG00000018707.13	Dync1h1	chr12:110601451-110666945	WT_U	WT_D	OK	36.9411	40.1087	0.118688	-0.508931	0.3205	0.583938	no
ENSMUSG00000018733.10	ENSMUSG00000018733.10	Pex12	chr11:83294641-83405035	WT_U	WT_D	OK	8.06685	9.61748	0.253653	-0.403927	0.51	0.765145	no
ENSMUSG00000018736.14	ENSMUSG00000018736.14	Ndel1	chr11:68821433-68871858	WT_U	WT_D	OK	66.0754	65.1468	-0.0204189	0.0809655	0.91085	0.969154	no
ENSMUSG00000018740.14	ENSMUSG00000018740.14	Slc25a35	chr11:68968130-68975185	WT_U	WT_D	OK	0.380201	0.319247	-0.252089	0.228364	0.73535	0.905964	no
ENSMUSG00000018750.14	ENSMUSG00000018750.14	Zbtb4	chr11:69765911-69784023	WT_U	WT_D	OK	1.42191	1.66287	0.225845	-0.858541	0.1727	0.394233	no
ENSMUSG00000018752.19	ENSMUSG00000018752.19	Tnfsfm13	chr11:69682137-69696098	WT_U	WT_D	OK	0.488758	0.340969	-0.51948	1.02843	0.14055	0.342613	no
ENSMUSG00000018761.14	ENSMUSG00000018761.14	Mpdu1	chr11:69655313-69662642	WT_U	WT_D	OK	14.1504	14.1431	-0.000744459	0.00332679	0.9964	0.998133	no
ENSMUSG00000018765.5	ENSMUSG00000018765.5	Fxr2	chr11:69632989-69653297	WT_U	WT_D	OK	29.158	31.1057	0.0932872	-0.398496	0.5305	0.781083	no
ENSMUSG00000018770.9	ENSMUSG00000018770.9	Atp5g3	chr2:73908446-73911326	WT_U	WT_D	OK	537.802	394.554	-0.446852	2.60858	0.0003	0.00231843	yes
ENSMUSG00000018774.13	ENSMUSG00000018774.13	Cd68	chr11:69664212-69666153	WT_U	WT_D	OK	0.435668	0.334156	-0.382707	0.952313	0.1624	0.378121	no
ENSMUSG00000018796.12	ENSMUSG00000018796.12	Acsl1	chr8:46471040-46536051	WT_U	WT_D	OK	30.0213	38.9897	0.377107	-1.83013	0.00475	0.0246058	yes
ENSMUSG00000018800.14	ENSMUSG00000018800.14	Abca5	chr11:110269368-110337716	WT_U	WT_D	OK	1.04735	1.1088	0.0822555	-0.268148	0.6203	0.841903	no
ENSMUSG00000018809.2	ENSMUSG00000018809.2	Smyd4	chr11:75348432-75405705	WT_U	WT_D	OK	3.75845	3.77331	0.00569282	-0.0172941	0.98005	0.990919	no
ENSMUSG00000018819.10	ENSMUSG00000018819.10	Lsp1	chr7:142460808-142516009	WT_U	WT_D	OK	15.596	34.7872	1.15738	-4.07674	5e-05	0.00046241	yes
ENSMUSG00000018820.13	ENSMUSG00000018820.13	Zfyve27	chr19:42163950-42194590	WT_U	WT_D	OK	19.607	23.1584	0.240167	-0.901474	0.19385	0.426032	no
ENSMUSG00000018821.3	ENSMUSG00000018821.3	Avpi1	chr19:42123272-42129059	WT_U	WT_D	OK	10.5789	11.7023	0.145602	-0.697106	0.3192	0.582374	no
ENSMUSG00000018830.8	ENSMUSG00000018830.8	Myh11	chr16:14194526-14291408	WT_U	WT_D	OK	0.141738	0.0789787	-0.843691	2.59884	0.0005	0.00361297	yes
ENSMUSG00000018841.17	ENSMUSG00000018841.17	Rad51d	chr11:82876433-82890614	WT_U	WT_D	OK	10.1111	9.19493	-0.137029	0.585244	0.40505	0.673683	no
ENSMUSG00000018846.8	ENSMUSG00000018846.8	Pank3	chr11:35769483-35791285	WT_U	WT_D	OK	58.6977	53.4046	-0.13634	0.794124	0.25345	0.504078	no
ENSMUSG00000018848.4	ENSMUSG00000018848.4	Rars	chr11:35808380-35834506	WT_U	WT_D	OK	125.956	133.308	0.0818435	-0.468343	0.48795	0.74711	no
ENSMUSG00000018849.6	ENSMUSG00000018849.6	Wwc1	chr11:35838399-35980527	WT_U	WT_D	OK	28.9547	26.1939	-0.144567	0.716994	0.227	0.471062	no
ENSMUSG00000018858.15	ENSMUSG00000018858.15	Ict1	chr11:115403751-115412674	WT_U	WT_D	OK	80.7351	85.9025	0.0895041	-0.390763	0.57575	0.813792	no
ENSMUSG00000018861.8	ENSMUSG00000018861.8	Fdxr	chr11:115268023-115277050	WT_U	WT_D	OK	18.1025	16.627	-0.122661	0.519744	0.4503	0.715111	no
ENSMUSG00000018865.8	ENSMUSG00000018865.8	Sult4a1	chr15:84076096-84105754	WT_U	WT_D	OK	29.333	28.2164	-0.0559907	0.325671	0.63505	0.850778	no
ENSMUSG00000018882.12	ENSMUSG00000018882.12	Mrpl45	chr11:97315715-97329920	WT_U	WT_D	OK	19.4052	19.1155	-0.0217004	0.106288	0.8801	0.959706	no
ENSMUSG00000018899.16	ENSMUSG00000018899.16	Irf1	chr11:53770013-53778374	WT_U	WT_D	OK	12.2042	12.396	0.0224969	-0.0954643	0.8876	0.961792	no
ENSMUSG00000018900.7	ENSMUSG00000018900.7	Slc22a5	chr11:53864541-53891660	WT_U	WT_D	OK	3.67802	3.55219	-0.0502206	0.218463	0.7533	0.913609	no
ENSMUSG00000018906.14	ENSMUSG00000018906.14	P4ha2	chr11:54100094-54131665	WT_U	WT_D	OK	86.1374	64.6396	-0.414222	2.02695	0.0014	0.00877364	yes
ENSMUSG00000018909.15	ENSMUSG00000018909.15	Arrb1	chr7:99535465-99606771	WT_U	WT_D	OK	13.6748	9.96096	-0.457163	1.80836	0.00095	0.00629407	yes
ENSMUSG00000018921.11	ENSMUSG00000018921.11	Pelp1	chr11:70392882-70410031	WT_U	WT_D	OK	27.5054	26.0346	-0.0792846	0.450025	0.5058	0.761752	no
ENSMUSG00000018923.13	ENSMUSG00000018923.13	Med11	chr11:70451918-70453727	WT_U	WT_D	OK	22.1771	20.654	-0.10265	0.499859	0.47485	0.735607	no
ENSMUSG00000018931.3	ENSMUSG00000018931.3	Natd1	chr11:60902245-60914750	WT_U	WT_D	OK	4.07354	5.33172	0.388318	-1.9289	0.00585	0.0292924	yes
ENSMUSG00000018932.9	ENSMUSG00000018932.9	Map2k3	chr11:60932032-60952811	WT_U	WT_D	OK	22.7612	20.0467	-0.183212	0.851156	0.1979	0.432005	no
ENSMUSG00000018965.11	ENSMUSG00000018965.11	Ywhah	chr5:33018815-33027966	WT_U	WT_D	OK	294.021	258.907	-0.183485	0.699564	0.3107	0.572885	no
ENSMUSG00000018974.7	ENSMUSG00000018974.7	Sart3	chr5:113742445-113772510	WT_U	WT_D	OK	43.7803	37.9903	-0.204651	0.732402	0.24515	0.493963	no
ENSMUSG00000018983.9	ENSMUSG00000018983.9	E2f2	chr4:136172393-136196057	WT_U	WT_D	OK	15.1971	11.9149	-0.351029	1.65419	0.00745	0.0357462	yes
ENSMUSG00000018986.9	ENSMUSG00000018986.9	Slfn3	chr11:83191329-83215154	WT_U	WT_D	OK	7.79633	8.0624	0.0484142	-0.23796	0.73275	0.904685	no
ENSMUSG00000018995.12	ENSMUSG00000018995.12	Nars2	chr7:96171245-97064758	WT_U	WT_D	OK	11.3066	10.4621	-0.111993	0.198844	0.76065	0.916361	no
ENSMUSG00000018999.14	ENSMUSG00000018999.14	Slc35b4	chr6:34151928-34177111	WT_U	WT_D	OK	16.7206	17.5608	0.070732	-0.294244	0.66825	0.870759	no
ENSMUSG00000019027.7	ENSMUSG00000019027.7	Dnah1	chr14:31260374-31323896	WT_U	WT_D	OK	0.634181	1.23527	0.96186	-4.67527	5e-05	0.00046241	yes
ENSMUSG00000019039.13	ENSMUSG00000019039.13	Dalrd3	chr9:108569885-108578739	WT_U	WT_D	OK	5.91602	6.35569	0.103422	-0.0992739	0.8636	0.954786	no
ENSMUSG00000019054.13	ENSMUSG00000019054.13	Fis1	chr5:136953274-136966234	WT_U	WT_D	OK	88.3488	83.5935	-0.0798198	0.405605	0.56285	0.80534	no
ENSMUSG00000019055.15	ENSMUSG00000019055.15	Plod1	chr4:147909752-147936767	WT_U	WT_D	OK	34.3573	27.2913	-0.332176	1.68211	0.0086	0.0402202	yes
ENSMUSG00000019066.13	ENSMUSG00000019066.13	Rab3d	chr9:21907490-21918192	WT_U	WT_D	OK	6.17427	7.11408	0.204409	-0.632034	0.35405	0.621207	no
ENSMUSG00000019080.7	ENSMUSG00000019080.7	Mfsd3	chr15:76701541-76710559	WT_U	WT_D	OK	2.22537	2.33724	0.0707607	-0.111237	0.873	0.957549	no
ENSMUSG00000019082.17	ENSMUSG00000019082.17	Slc25a22	chr7:141429743-141437892	WT_U	WT_D	OK	17.8435	18.1417	0.023911	-0.0933969	0.8767	0.958847	no
ENSMUSG00000019087.13	ENSMUSG00000019087.13	Atp6ap1	chrX:74297096-74304721	WT_U	WT_D	OK	51.5267	53.4508	0.0528913	-0.292838	0.6625	0.867506	no
ENSMUSG00000019088.13	ENSMUSG00000019088.13	Dnase1l1	chrX:74273216-74290151	WT_U	WT_D	OK	3.2822	2.16545	-0.599996	0.75039	0.2985	0.558833	no
ENSMUSG00000019102.10	ENSMUSG00000019102.10	Aldh3a1	chr11:61207536-61218421	WT_U	WT_D	OK	1.18375	0.570862	-1.05215	2.10031	0.00285	0.0160515	yes
ENSMUSG00000019124.10	ENSMUSG00000019124.10	Scrn1	chr6:54039553-54566489	WT_U	WT_D	OK	22.2414	15.8205	-0.491452	0.717725	0.2294	0.474108	no
ENSMUSG00000019132.10	ENSMUSG00000019132.10	BC005537	chr13:24801656-24814013	WT_U	WT_D	OK	35.5439	44.0084	0.308177	-1.78077	0.0089	0.0413702	yes
ENSMUSG00000019139.9	ENSMUSG00000019139.9	Isyna1	chr8:70594480-70597288	WT_U	WT_D	OK	33.282	34.5617	0.0544321	-0.315966	0.6602	0.866105	no
ENSMUSG00000019143.15	ENSMUSG00000019143.15	Hars2	chr18:36766529-36792562	WT_U	WT_D	OK	17.5801	18.5116	0.0744863	-0.134955	0.8375	0.946248	no
ENSMUSG00000019158.8	ENSMUSG00000019158.8	Tmem160	chr7:16452778-16455489	WT_U	WT_D	OK	21.7721	23.1034	0.0856246	-0.422121	0.54185	0.789648	no
ENSMUSG00000019173.11	ENSMUSG00000019173.11	Rab5c	chr11:100715008-100738215	WT_U	WT_D	OK	91.698	81.3714	-0.172368	1.00653	0.14525	0.350573	no
ENSMUSG00000019178.17	ENSMUSG00000019178.17	Styxl1	chr5:135747219-135778385	WT_U	WT_D	OK	0.123719	0.211545	0.773898	-1.10973	0.0825	0.233994	no
ENSMUSG00000019179.10	ENSMUSG00000019179.10	Mdh2	chr5:135778479-135790398	WT_U	WT_D	OK	320.576	269.189	-0.252047	1.44267	0.03735	0.128911	no
ENSMUSG00000019188.16	ENSMUSG00000019188.16	H13	chr2:152669460-152708670	WT_U	WT_D	OK	60.396	65.7147	0.121763	-0.628624	0.3651	0.633221	no
ENSMUSG00000019189.13	ENSMUSG00000019189.13	Rnf145	chr11:44518963-44565520	WT_U	WT_D	OK	23.928	22.5212	-0.0874161	0.431744	0.4874	0.746542	no
ENSMUSG00000019194.14	ENSMUSG00000019194.14	Scn1b	chr7:31116524-31126945	WT_U	WT_D	OK	3.2334	2.71458	-0.252323	1.12071	0.10975	0.287849	no
ENSMUSG00000019210.10	ENSMUSG00000019210.10	Atp6v1e1	chr6:120773577-120822793	WT_U	WT_D	OK	71.3179	68.0486	-0.0676987	0.349271	0.60825	0.834878	no
ENSMUSG00000019214.13	ENSMUSG00000019214.13	Chtf18	chr17:25717170-25727419	WT_U	WT_D	OK	14.1891	12.2697	-0.209683	0.779147	0.2472	0.496765	no
ENSMUSG00000019230.14	ENSMUSG00000019230.14	Lhx9	chr1:138825185-138848577	WT_U	WT_D	OK	2.21897	1.6369	-0.438924	1.59684	0.02365	0.0904225	no
ENSMUSG00000019235.8	ENSMUSG00000019235.8	Rps6kl1	chr12:85135595-85151264	WT_U	WT_D	OK	3.87848	6.50323	0.745665	-3.63668	5e-05	0.00046241	yes
ENSMUSG00000019254.16	ENSMUSG00000019254.16	Ppp1r12c	chr7:4481519-4501680	WT_U	WT_D	OK	40.2752	36.663	-0.135567	0.510564	0.45615	0.72028	no
ENSMUSG00000019261.2	ENSMUSG00000019261.2	Map1s	chr8:70905973-70917526	WT_U	WT_D	OK	19.4098	19.7219	0.0230133	-0.133608	0.84955	0.950315	no
ENSMUSG00000019295.8	ENSMUSG00000019295.8	Tmem129	chr5:33634951-33678995	WT_U	WT_D	OK	28.6732	28.2494	-0.0214827	0.0592083	0.92695	0.974159	no
ENSMUSG00000019297.8	ENSMUSG00000019297.8	Nop9	chr14:55745692-55758458	WT_U	WT_D	OK	17.7801	17.2143	-0.0466559	0.271183	0.6949	0.885517	no
ENSMUSG00000019301.5	ENSMUSG00000019301.5	Hsd17b1	chr11:101078410-101080527	WT_U	WT_D	OK	0.869181	1.39131	0.678715	-2.46818	0.00075	0.0051382	yes
ENSMUSG00000019302.16	ENSMUSG00000019302.16	Atp6v0a1	chr11:101009451-101063719	WT_U	WT_D	OK	44.6923	46.4003	0.0541078	-0.236153	0.73055	0.903707	no
ENSMUSG00000019303.14	ENSMUSG00000019303.14	Psmc3ip	chr11:101087276-101095436	WT_U	WT_D	OK	23.041	25.4889	0.145666	-0.473104	0.49645	0.754029	no
ENSMUSG00000019320.13	ENSMUSG00000019320.13	Noxo1	chr17:24696233-24707660	WT_U	WT_D	OK	0.360728	0.348119	-0.0513309	0.0229659	0.95625	0.983004	no
ENSMUSG00000019326.14	ENSMUSG00000019326.14	Aoc3	chr11:101330604-101347939	WT_U	WT_D	OK	0.138256	0.141599	0.034469	-0.10053	0.88565	0.961447	no
ENSMUSG00000019338.13	ENSMUSG00000019338.13	Zfp687	chr3:94974730-95015448	WT_U	WT_D	OK	11.4073	11.6839	0.0345646	-0.0977855	0.87995	0.959706	no
ENSMUSG00000019362.7	ENSMUSG00000019362.7	D8Ertd738e	chr8:84246236-84249761	WT_U	WT_D	OK	104.03	95.6753	-0.120781	0.617846	0.3801	0.648914	no
ENSMUSG00000019370.10	ENSMUSG00000019370.10	Calm3	chr7:16915378-16924114	WT_U	WT_D	OK	226.747	200.624	-0.176589	0.982989	0.147	0.353417	no
ENSMUSG00000019373.11	ENSMUSG00000019373.11	Cops3	chr11:59810079-59880968	WT_U	WT_D	OK	122.894	120.586	-0.0273521	0.137437	0.82995	0.943602	no
ENSMUSG00000019428.16	ENSMUSG00000019428.16	Fkbp8	chr8:70508262-70535328	WT_U	WT_D	OK	125.908	122.892	-0.034979	0.0997399	0.88125	0.960134	no
ENSMUSG00000019432.15	ENSMUSG00000019432.15	Ddx39b	chr17:35241745-35253707	WT_U	WT_D	OK	235.999	223.72	-0.0770865	0.447851	0.52895	0.779981	no
ENSMUSG00000019433.8	ENSMUSG00000019433.8	Gipc1	chr8:83652677-83664788	WT_U	WT_D	OK	38.8848	39.293	0.015066	-0.0874526	0.8964	0.964537	no
ENSMUSG00000019437.17	ENSMUSG00000019437.17	Tlcd1	chr11:78176710-78183584	WT_U	WT_D	OK	8.20787	10.505	0.355996	-0.208994	0.69335	0.88479	no
ENSMUSG00000019461.12	ENSMUSG00000019461.12	Plscr3	chr11:69846375-69858730	WT_U	WT_D	OK	16.7934	21.7169	0.370924	-1.66004	0.01845	0.0743543	no
ENSMUSG00000019464.5	ENSMUSG00000019464.5	Ptger1	chr8:83666832-83699179	WT_U	WT_D	OK	0.355339	0.3661	0.0430417	-0.039582	0.9524	0.981898	no
ENSMUSG00000019467.13	ENSMUSG00000019467.13	Arhgef25	chr10:127182520-127190054	WT_U	WT_D	OK	18.9937	16.3405	-0.217069	1.11562	0.1101	0.288601	no
ENSMUSG00000019470.12	ENSMUSG00000019470.12	Xab2	chr8:3587449-3621316	WT_U	WT_D	OK	45.6319	50.3696	0.142511	-0.765562	0.27175	0.526613	no
ENSMUSG00000019471.9	ENSMUSG00000019471.9	Cdc37	chr9:21138540-21149906	WT_U	WT_D	OK	60.4874	53.5854	-0.174795	1.02325	0.15045	0.359118	no
ENSMUSG00000019487.10	ENSMUSG00000019487.10	Trip10	chr17:57249450-57263697	WT_U	WT_D	OK	17.6888	14.5987	-0.276996	1.40892	0.04345	0.144942	no
ENSMUSG00000019494.14	ENSMUSG00000019494.14	Cops6	chr5:138161070-138187451	WT_U	WT_D	OK	85.2142	86.9847	0.0296678	-0.0797128	0.90945	0.968657	no
ENSMUSG00000019505.7	ENSMUSG00000019505.7	Ubb	chr11:62551170-62553213	WT_U	WT_D	OK	361.829	418.911	0.211336	-1.2267	0.07975	0.228275	no
ENSMUSG00000019518.10	ENSMUSG00000019518.10	Ap4m1	chr5:138161070-138187451	WT_U	WT_D	OK	9.43784	12.1455	0.363893	-0.381155	0.51735	0.770966	no
ENSMUSG00000019528.18	ENSMUSG00000019528.18	Gyg	chr3:20122083-20155317	WT_U	WT_D	OK	7.18332	8.30826	0.209896	-1.01719	0.1447	0.349607	no
ENSMUSG00000019539.10	ENSMUSG00000019539.10	Rcn3	chr7:45082913-45092213	WT_U	WT_D	OK	62.8242	40.1406	-0.646258	3.51882	5e-05	0.00046241	yes
ENSMUSG00000019558.14	ENSMUSG00000019558.14	Slc6a8	chrX:73673149-73682502	WT_U	WT_D	OK	8.15467	6.78837	-0.264561	1.07208	0.10105	0.271156	no
ENSMUSG00000019564.12	ENSMUSG00000019564.12	Arid3a	chr10:79927042-79955018	WT_U	WT_D	OK	8.71713	9.39848	0.108574	-0.488984	0.47755	0.737941	no
ENSMUSG00000019578.11	ENSMUSG00000019578.11	Ubxn6	chr17:56040415-56075028	WT_U	WT_D	OK	24.346	27.6501	0.1836	-0.375742	0.5863	0.820486	no
ENSMUSG00000019579.13	ENSMUSG00000019579.13	Mydgf	chr17:56175743-56183920	WT_U	WT_D	OK	41.3934	36.7756	-0.170652	0.968783	0.15435	0.365501	no
ENSMUSG00000019590.16	ENSMUSG00000019590.16	Cyb561	chr11:105933701-105953336	WT_U	WT_D	OK	10.9474	13.9457	0.349232	-1.46722	0.02815	0.103702	no
ENSMUSG00000019647.16	ENSMUSG00000019647.16	Sema6a	chr18:47235597-47368870	WT_U	WT_D	OK	5.59559	6.88913	0.300032	-1.38937	0.03645	0.126642	no
ENSMUSG00000019659.8	ENSMUSG00000019659.8	Ccdc12	chr9:110656502-110711606	WT_U	WT_D	OK	58.5549	54.0634	-0.115138	0.581178	0.402	0.670864	no
ENSMUSG00000019689.4	ENSMUSG00000019689.4	1110001J03Rik	chr6:38533501-38539449	WT_U	WT_D	OK	18.4686	21.5938	0.225543	-1.03995	0.13275	0.3291	no
ENSMUSG00000019699.15	ENSMUSG00000019699.15	Akt3	chr1:176814659-177258203	WT_U	WT_D	OK	70.7544	63.3337	-0.159847	0.743118	0.28335	0.540396	no
ENSMUSG00000019710.13	ENSMUSG00000019710.13	Mrpl24	chr3:87919505-87940686	WT_U	WT_D	OK	49.5089	63.6042	0.361434	-1.15536	0.09315	0.255423	no
ENSMUSG00000019715.14	ENSMUSG00000019715.14	Gle1	chr2:29935425-29960371	WT_U	WT_D	OK	33.9503	34.3456	0.016701	-0.0619335	0.9281	0.974465	no
ENSMUSG00000019718.8	ENSMUSG00000019718.8	L3hypdh	chr12:72073427-72085439	WT_U	WT_D	OK	3.18646	2.59177	-0.298017	1.17506	0.09745	0.264156	no
ENSMUSG00000019726.10	ENSMUSG00000019726.10	Lyst	chr13:13590408-13777440	WT_U	WT_D	OK	10.6076	11.7955	0.153138	-0.896459	0.20155	0.437381	no
ENSMUSG00000019731.13	ENSMUSG00000019731.13	Slc35e1	chr8:72480640-72492614	WT_U	WT_D	OK	6.42153	6.28118	-0.0318815	0.151324	0.81915	0.93978	no
ENSMUSG00000019732.14	ENSMUSG00000019732.14	Calr3	chr8:72424175-72443870	WT_U	WT_D	OK	0.958192	2.17702	1.18397	-4.66221	5e-05	0.00046241	yes
ENSMUSG00000019734.16	ENSMUSG00000019734.16	Tmc4	chr7:3645267-3677553	WT_U	WT_D	OK	1.87567	1.43366	-0.387703	0.192986	0.7342	0.905404	no
ENSMUSG00000019737.14	ENSMUSG00000019737.14	Syne4	chr7:30314806-30319046	WT_U	WT_D	OK	1.37233	1.53123	0.158064	-0.475481	0.4608	0.724085	no
ENSMUSG00000019738.15	ENSMUSG00000019738.15	Polr2i	chr7:30224130-30233390	WT_U	WT_D	OK	35.7316	31.6847	-0.173414	0.414884	0.5451	0.792149	no
ENSMUSG00000019762.4	ENSMUSG00000019762.4	Iyd	chr10:3540239-3554877	WT_U	WT_D	OK	0.0881526	0.210558	1.25614	-2.12789	0.01325	0.0570636	no
ENSMUSG00000019763.11	ENSMUSG00000019763.11	Rmnd1	chr10:4401914-4432388	WT_U	WT_D	OK	21.3584	19.1182	-0.159857	0.557368	0.42425	0.69197	no
ENSMUSG00000019767.12	ENSMUSG00000019767.12	Ccdc170	chr10:4482501-4562231	WT_U	WT_D	OK	0.20026	0.145529	-0.460568	0.828008	0.1561	0.368392	no
ENSMUSG00000019768.16	ENSMUSG00000019768.16	Esr1	chr10:4611592-5005614	WT_U	WT_D	OK	0.937709	0.907552	-0.04716	0.150327	0.82155	0.940401	no
ENSMUSG00000019772.4	ENSMUSG00000019772.4	Vip	chr10:5639217-5647614	WT_U	WT_D	OK	0.554372	0.0694988	-2.99579	5.62005	5e-05	0.00046241	yes
ENSMUSG00000019773.7	ENSMUSG00000019773.7	Fbxo5	chr10:5799159-5805600	WT_U	WT_D	OK	47.9284	42.2707	-0.181223	1.01187	0.13095	0.326073	no
ENSMUSG00000019774.8	ENSMUSG00000019774.8	Mtrf1l	chr10:5811886-5823910	WT_U	WT_D	OK	10.5603	9.38628	-0.170025	0.52811	0.4529	0.717444	no
ENSMUSG00000019775.17	ENSMUSG00000019775.17	Rgs17	chr10:5825662-5922400	WT_U	WT_D	OK	7.90524	7.20054	-0.134704	0.477169	0.49745	0.754793	no
ENSMUSG00000019777.16	ENSMUSG00000019777.16	Hdac2	chr10:36974543-37001889	WT_U	WT_D	OK	208.927	188.316	-0.149843	0.829828	0.2243	0.467696	no
ENSMUSG00000019779.14	ENSMUSG00000019779.14	Frk	chr10:34483399-34611226	WT_U	WT_D	OK	0.134589	0.0362856	-1.89109	4.17571	5e-05	0.00046241	yes
ENSMUSG00000019782.9	ENSMUSG00000019782.9	Rwdd1	chr10:33996554-34019624	WT_U	WT_D	OK	134.528	123.427	-0.124248	0.726421	0.2998	0.56066	no
ENSMUSG00000019785.13	ENSMUSG00000019785.13	Clvs2	chr10:33512285-33662432	WT_U	WT_D	OK	0.535405	0.805605	0.589442	-0.846068	0.1797	0.404799	no
ENSMUSG00000019789.8	ENSMUSG00000019789.8	Hey2	chr10:30832358-30842801	WT_U	WT_D	OK	1.86717	1.06377	-0.811667	3.51788	5e-05	0.00046241	yes
ENSMUSG00000019790.16	ENSMUSG00000019790.16	Stxbp5	chr10:9755546-9901079	WT_U	WT_D	OK	19.2882	18.6004	-0.0523849	0.202815	0.7233	0.90015	no
ENSMUSG00000019791.11	ENSMUSG00000019791.11	Hint3	chr10:30608140-30618479	WT_U	WT_D	OK	5.78714	8.04853	0.475875	-2.14804	0.00195	0.0116367	yes
ENSMUSG00000019792.7	ENSMUSG00000019792.7	Trmt11	chr10:30534224-30600749	WT_U	WT_D	OK	11.9149	10.3355	-0.205159	1.0343	0.13375	0.330809	no
ENSMUSG00000019794.13	ENSMUSG00000019794.13	Katna1	chr10:7725999-7763150	WT_U	WT_D	OK	35.9009	33.8227	-0.0860282	0.45685	0.50995	0.765127	no
ENSMUSG00000019795.17	ENSMUSG00000019795.17	Pcmt1	chr10:7629372-7681136	WT_U	WT_D	OK	88.4537	81.5132	-0.117889	0.512482	0.45565	0.719911	no
ENSMUSG00000019796.12	ENSMUSG00000019796.12	Lrp11	chr10:7589799-7625483	WT_U	WT_D	OK	101.573	88.0916	-0.205441	0.921157	0.18395	0.41133	no
ENSMUSG00000019797.10	ENSMUSG00000019797.10	1700021F05Rik	chr10:43525120-43540994	WT_U	WT_D	OK	51.1955	39.8885	-0.360044	1.74514	0.0114	0.0505766	no
ENSMUSG00000019802.13	ENSMUSG00000019802.13	Sec63	chr10:42761495-42832514	WT_U	WT_D	OK	85.0478	82.5824	-0.0424396	0.130285	0.8492	0.950231	no
ENSMUSG00000019804.12	ENSMUSG00000019804.12	Snx3	chr10:42502029-42535381	WT_U	WT_D	OK	159.189	141.235	-0.172643	1.00759	0.15185	0.361409	no
ENSMUSG00000019806.13	ENSMUSG00000019806.13	Aig1	chr10:13647053-13868980	WT_U	WT_D	OK	10.8229	15.1096	0.481378	-2.26323	0.00125	0.00795906	yes
ENSMUSG00000019808.8	ENSMUSG00000019808.8	Adat2	chr10:13523841-13563376	WT_U	WT_D	OK	11.0099	10.9933	-0.00217684	0.00601575	0.9921	0.995867	no
ENSMUSG00000019809.16	ENSMUSG00000019809.16	Pex3	chr10:13523841-13563376	WT_U	WT_D	OK	16.9847	17.7458	0.0632419	-0.265752	0.70265	0.890027	no
ENSMUSG00000019810.15	ENSMUSG00000019810.15	Fuca2	chr10:13499539-13519035	WT_U	WT_D	OK	27.5198	28.1248	0.0313729	-0.135217	0.84505	0.948713	no
ENSMUSG00000019813.15	ENSMUSG00000019813.15	Cep57l1	chr10:41718839-41809871	WT_U	WT_D	OK	23.9066	24.4302	0.0312567	-0.13245	0.8518	0.950921	no
ENSMUSG00000019814.4	ENSMUSG00000019814.4	Ltv1	chr10:13178639-13193137	WT_U	WT_D	OK	107.477	100.302	-0.0996776	0.583843	0.4065	0.674974	no
ENSMUSG00000019818.15	ENSMUSG00000019818.15	Cd164	chr10:41519413-41531048	WT_U	WT_D	OK	108.387	103.782	-0.0626355	0.352836	0.597	0.827462	no
ENSMUSG00000019820.9	ENSMUSG00000019820.9	Utrn	chr10:12382187-12861735	WT_U	WT_D	OK	17.2666	16.9012	-0.0308583	0.180682	0.79695	0.931559	no
ENSMUSG00000019822.12	ENSMUSG00000019822.12	Smpd2	chr10:41476313-41490369	WT_U	WT_D	OK	10.484	9.52081	-0.139033	0.305095	0.6425	0.855406	no
ENSMUSG00000019823.17	ENSMUSG00000019823.17	Mical1	chr10:41476313-41490369	WT_U	WT_D	OK	23.2874	17.0108	-0.453099	1.46735	0.0157	0.0654352	no
ENSMUSG00000019826.10	ENSMUSG00000019826.10	Zbtb24	chr10:41450395-41465571	WT_U	WT_D	OK	5.05679	5.82471	0.203964	-1.00803	0.1477	0.35453	no
ENSMUSG00000019828.13	ENSMUSG00000019828.13	Grm1	chr10:10686058-11082356	WT_U	WT_D	OK	2.68929	1.62025	-0.731009	2.43143	5e-05	0.00046241	yes
ENSMUSG00000019831.14	ENSMUSG00000019831.14	Wasf1	chr10:40883474-40938570	WT_U	WT_D	OK	42.7131	39.4502	-0.114646	0.670308	0.333	0.5987	no
ENSMUSG00000019832.3	ENSMUSG00000019832.3	Rab32	chr10:10545010-10558233	WT_U	WT_D	OK	6.18864	1.91386	-1.69314	7.84142	5e-05	0.00046241	yes
ENSMUSG00000019837.7	ENSMUSG00000019837.7	Gtf3c6	chr10:40249202-40257665	WT_U	WT_D	OK	54.8573	61.1595	0.156893	-0.803392	0.2542	0.505018	no
ENSMUSG00000019838.10	ENSMUSG00000019838.10	Slc16a10	chr10:40033534-40142254	WT_U	WT_D	OK	3.52326	3.74978	0.089895	-0.449602	0.5214	0.774318	no
ENSMUSG00000019841.15	ENSMUSG00000019841.15	Rev3l	chr10:39732117-39875211	WT_U	WT_D	OK	22.6068	26.0372	0.203818	-0.608084	0.2381	0.485173	no
ENSMUSG00000019842.6	ENSMUSG00000019842.6	Traf3ip2	chr10:39368854-39732007	WT_U	WT_D	OK	9.66565	12.7883	0.403886	-0.539555	0.24505	0.493841	no
ENSMUSG00000019843.14	ENSMUSG00000019843.14	Fyn	chr10:39368854-39732007	WT_U	WT_D	OK	36.8447	54.5842	0.567026	-1.96283	0.0056	0.0282325	yes
ENSMUSG00000019845.7	ENSMUSG00000019845.7	Tube1	chr10:39134022-39163794	WT_U	WT_D	OK	6.64422	5.89298	-0.173102	0.862184	0.20835	0.446709	no
ENSMUSG00000019846.11	ENSMUSG00000019846.11	Lama4	chr10:38965514-39110188	WT_U	WT_D	OK	9.78228	11.0211	0.172026	-0.933228	0.15105	0.360121	no
ENSMUSG00000019848.14	ENSMUSG00000019848.14	Popdc3	chr10:45178097-45318452	WT_U	WT_D	OK	5.17929	9.18943	0.827221	-3.91379	5e-05	0.00046241	yes
ENSMUSG00000019849.10	ENSMUSG00000019849.10	Prep	chr10:45067205-45158997	WT_U	WT_D	OK	101.617	98.3036	-0.0478256	0.279758	0.6869	0.880811	no
ENSMUSG00000019850.11	ENSMUSG00000019850.11	Tnfaip3	chr10:19000909-19015657	WT_U	WT_D	OK	1.18691	0.343332	-1.78953	5.8495	5e-05	0.00046241	yes
ENSMUSG00000019851.7	ENSMUSG00000019851.7	Perp	chr10:18845070-18857073	WT_U	WT_D	OK	0.0648522	0.0774701	0.256484	-0.420806	0.5527	0.797893	no
ENSMUSG00000019852.6	ENSMUSG00000019852.6	Arfgef3	chr10:18588010-18743758	WT_U	WT_D	OK	7.81232	9.7264	0.316155	-1.84116	0.00905	0.0419352	yes
ENSMUSG00000019853.5	ENSMUSG00000019853.5	Hebp2	chr10:18540122-18546076	WT_U	WT_D	OK	14.8524	10.765	-0.464348	2.33184	0.00105	0.0068582	yes
ENSMUSG00000019854.16	ENSMUSG00000019854.16	Reps1	chr10:18055860-18125155	WT_U	WT_D	OK	72.4523	75.3373	0.0563328	-0.26328	0.7039	0.890664	no
ENSMUSG00000019857.6	ENSMUSG00000019857.6	Asf1a	chr10:53536328-53630439	WT_U	WT_D	OK	16.0161	17.2299	0.105391	-0.46526	0.51395	0.768345	no
ENSMUSG00000019861.14	ENSMUSG00000019861.14	Gopc	chr10:52337023-52382124	WT_U	WT_D	OK	24.1919	21.9409	-0.140901	0.820748	0.24065	0.488462	no
ENSMUSG00000019863.6	ENSMUSG00000019863.6	Qrsl1	chr10:43874187-43901745	WT_U	WT_D	OK	19.1463	18.0072	-0.0884918	0.421787	0.54705	0.793762	no
ENSMUSG00000019864.13	ENSMUSG00000019864.13	Rtn4ip1	chr10:43901806-43947862	WT_U	WT_D	OK	16.0348	14.4804	-0.147105	0.749086	0.28495	0.542384	no
ENSMUSG00000019865.9	ENSMUSG00000019865.9	Nmbr	chr10:14705590-14770850	WT_U	WT_D	OK	0.169853	0.086862	-0.96749	0.836651	0.15505	0.366639	no
ENSMUSG00000019868.16	ENSMUSG00000019868.16	Vta1	chr10:14654754-14705560	WT_U	WT_D	OK	55.0501	52.3821	-0.0716713	0.320971	0.64395	0.856118	no
ENSMUSG00000019873.7	ENSMUSG00000019873.7	Reep3	chr10:67009188-67256326	WT_U	WT_D	OK	23.537	30.0101	0.350518	-1.38044	0.04755	0.155168	no
ENSMUSG00000019877.10	ENSMUSG00000019877.10	Serinc1	chr10:57515773-57532530	WT_U	WT_D	OK	136.315	148.381	0.122362	-0.710999	0.3002	0.56101	no
ENSMUSG00000019878.7	ENSMUSG00000019878.7	Hsf2	chr10:57486384-57513133	WT_U	WT_D	OK	24.2781	23.4943	-0.0473447	0.275008	0.69275	0.884509	no
ENSMUSG00000019883.10	ENSMUSG00000019883.10	Echdc1	chr10:29313165-29362442	WT_U	WT_D	OK	48.3311	40.3231	-0.261345	0.862279	0.2133	0.453326	no
ENSMUSG00000019891.13	ENSMUSG00000019891.13	Dcbld1	chr10:52233618-52321378	WT_U	WT_D	OK	2.83139	2.65072	-0.0951262	0.454364	0.5193	0.772573	no
ENSMUSG00000019892.12	ENSMUSG00000019892.12	Lrriq1	chr10:103063197-103236322	WT_U	WT_D	OK	0.0947837	0.148699	0.649684	-1.31157	0.06745	0.201591	no
ENSMUSG00000019894.13	ENSMUSG00000019894.13	Slc6a15	chr10:103367807-103419378	WT_U	WT_D	OK	23.3418	22.5957	-0.0468676	0.273752	0.69375	0.885053	no
ENSMUSG00000019897.8	ENSMUSG00000019897.8	Ccdc59	chr10:105763188-105847833	WT_U	WT_D	OK	37.6725	37.2311	-0.0170035	0.0714198	0.91575	0.97043	no
ENSMUSG00000019899.15	ENSMUSG00000019899.15	Lama2	chr10:26980035-27619758	WT_U	WT_D	OK	0.240324	0.106879	-1.169	1.11213	0.0772	0.222925	no
ENSMUSG00000019906.14	ENSMUSG00000019906.14	Lin7a	chr10:107271842-107425143	WT_U	WT_D	OK	0.0145426	0.198847	3.7733	-6.74127	5e-05	0.00046241	yes
ENSMUSG00000019907.9	ENSMUSG00000019907.9	Ppp1r12a	chr10:108162399-108277575	WT_U	WT_D	OK	38.4028	40.1193	0.0630849	-0.369261	0.6026	0.831074	no
ENSMUSG00000019916.14	ENSMUSG00000019916.14	P4ha1	chr10:59323295-59373304	WT_U	WT_D	OK	41.5177	29.934	-0.471941	2.70729	0.0001	0.000870202	yes
ENSMUSG00000019917.9	ENSMUSG00000019917.9	Sept10	chr10:59164112-59221847	WT_U	WT_D	OK	44.7763	46.2417	0.0464591	-0.271673	0.6979	0.887263	no
ENSMUSG00000019920.17	ENSMUSG00000019920.17	Lims1	chr10:58323465-58424691	WT_U	WT_D	OK	45.4084	45.6434	0.00744706	-0.0363305	0.9523	0.981885	no
ENSMUSG00000019923.13	ENSMUSG00000019923.13	Zwint	chr10:72654844-72674964	WT_U	WT_D	OK	139.386	188.069	0.432176	-2.40104	0.0005	0.00361297	yes
ENSMUSG00000019927.6	ENSMUSG00000019927.6	Ube2d1	chr10:71254979-71285262	WT_U	WT_D	OK	65.6952	67.1515	0.0316317	-0.17348	0.80305	0.933613	no
ENSMUSG00000019929.15	ENSMUSG00000019929.15	Dcn	chr10:97479499-97518162	WT_U	WT_D	OK	0.499448	0.552704	0.146173	-0.490512	0.48765	0.746765	no
ENSMUSG00000019942.12	ENSMUSG00000019942.12	Cdk1	chr10:69336634-69352938	WT_U	WT_D	OK	453.429	390.936	-0.213944	1.01004	0.14565	0.351225	no
ENSMUSG00000019943.9	ENSMUSG00000019943.9	Atp2b1	chr10:98915151-99026143	WT_U	WT_D	OK	45.3521	48.0503	0.0833761	-0.486823	0.49155	0.749986	no
ENSMUSG00000019944.14	ENSMUSG00000019944.14	Rhobtb1	chr10:69151433-69291791	WT_U	WT_D	OK	5.21171	5.72739	0.136121	-0.381915	0.50165	0.758009	no
ENSMUSG00000019947.9	ENSMUSG00000019947.9	Arid5b	chr10:68095592-68278726	WT_U	WT_D	OK	5.17845	4.34199	-0.254164	1.27393	0.0681	0.203056	no
ENSMUSG00000019948.3	ENSMUSG00000019948.3	Actr6	chr10:89711972-89732295	WT_U	WT_D	OK	10.1753	10.2148	0.00558963	-0.0276595	0.9702	0.987638	no
ENSMUSG00000019951.9	ENSMUSG00000019951.9	Uhrf1bp1l	chr10:89744990-89819869	WT_U	WT_D	OK	11.5394	13.0137	0.173463	-1.01156	0.146	0.351739	no
ENSMUSG00000019952.14	ENSMUSG00000019952.14	Poc1b	chr10:99107035-99198074	WT_U	WT_D	OK	20.4771	18.5103	-0.145683	0.525504	0.4491	0.713828	no
ENSMUSG00000019960.7	ENSMUSG00000019960.7	Dusp6	chr10:99263230-99267488	WT_U	WT_D	OK	47.7645	55.3689	0.213137	-1.24767	0.07625	0.220844	no
ENSMUSG00000019961.16	ENSMUSG00000019961.16	Tmpo	chr10:91147570-91171582	WT_U	WT_D	OK	115.045	111.816	-0.0410716	0.23867	0.73305	0.904872	no
ENSMUSG00000019969.13	ENSMUSG00000019969.13	Psen1	chr12:83688202-83735199	WT_U	WT_D	OK	25.6652	27.3638	0.0924551	-0.495693	0.47475	0.735555	no
ENSMUSG00000019970.15	ENSMUSG00000019970.15	Sgk1	chr10:21882183-21999903	WT_U	WT_D	OK	23.4204	17.2124	-0.444317	1.51291	0.02695	0.100258	no
ENSMUSG00000019971.9	ENSMUSG00000019971.9	Cep290	chr10:100488288-100589259	WT_U	WT_D	OK	6.76536	6.9955	0.0482605	-0.225713	0.7501	0.91208	no
ENSMUSG00000019975.11	ENSMUSG00000019975.11	Ikbip	chr10:91082939-91102607	WT_U	WT_D	OK	9.90072	8.67286	-0.191026	0.735981	0.27635	0.532039	no
ENSMUSG00000019977.15	ENSMUSG00000019977.15	Hbs1l	chr10:21295978-21368889	WT_U	WT_D	OK	48.4038	49.358	0.0281636	-0.164344	0.8087	0.935752	no
ENSMUSG00000019978.15	ENSMUSG00000019978.15	Epb41l2	chr10:25359797-25523519	WT_U	WT_D	OK	55.3707	43.4542	-0.349627	2.04739	0.00275	0.0155864	yes
ENSMUSG00000019979.12	ENSMUSG00000019979.12	Apaf1	chr10:90989310-91082770	WT_U	WT_D	OK	5.73832	5.77322	0.00874778	-0.0313594	0.9518	0.981754	no
ENSMUSG00000019982.14	ENSMUSG00000019982.14	Myb	chr10:21124935-21160905	WT_U	WT_D	OK	14.3353	13.7381	-0.0613896	0.30913	0.65635	0.863451	no
ENSMUSG00000019984.16	ENSMUSG00000019984.16	Med23	chr10:24869985-24913681	WT_U	WT_D	OK	22.1721	24.0171	0.115317	-0.508553	0.3657	0.633933	no
ENSMUSG00000019986.16	ENSMUSG00000019986.16	Ahi1	chr10:20952546-21080428	WT_U	WT_D	OK	20.935	25.3742	0.277445	-1.61895	0.018	0.0729693	no
ENSMUSG00000019988.6	ENSMUSG00000019988.6	Nedd1	chr10:92684745-92722420	WT_U	WT_D	OK	13.1115	12.2862	-0.093794	0.479437	0.4979	0.755179	no
ENSMUSG00000019989.7	ENSMUSG00000019989.7	Enpp3	chr10:24773813-24836195	WT_U	WT_D	OK	34.2632	18.529	-0.886875	4.82879	5e-05	0.00046241	yes
ENSMUSG00000019992.7	ENSMUSG00000019992.7	Mtfr2	chr10:20347818-20361669	WT_U	WT_D	OK	5.29161	4.16593	-0.345068	1.66873	0.01565	0.0652594	no
ENSMUSG00000019998.5	ENSMUSG00000019998.5	Stx7	chr10:24149316-24188959	WT_U	WT_D	OK	19.9481	22.1352	0.150091	-0.768837	0.26885	0.523077	no
ENSMUSG00000020003.15	ENSMUSG00000020003.15	Pex7	chr10:19859928-19907689	WT_U	WT_D	OK	7.18352	6.91298	-0.0553832	0.264615	0.6994	0.888021	no
ENSMUSG00000020009.12	ENSMUSG00000020009.12	Ifngr1	chr10:19591948-19610229	WT_U	WT_D	OK	8.23638	7.42005	-0.150581	0.660707	0.29235	0.551379	no
ENSMUSG00000020014.15	ENSMUSG00000020014.15	Cfap54	chr10:92775618-93081618	WT_U	WT_D	OK	0.417152	0.470389	0.173281	-0.402233	0.52255	0.774969	no
ENSMUSG00000020015.9	ENSMUSG00000020015.9	Cdk17	chr10:93160875-93241342	WT_U	WT_D	OK	12.6624	14.0268	0.147635	-0.755703	0.27425	0.529655	no
ENSMUSG00000020017.14	ENSMUSG00000020017.14	Hal	chr10:93488767-93519304	WT_U	WT_D	OK	0.165715	0.0710032	-1.22275	1.49817	0.0098	0.0447299	yes
ENSMUSG00000020018.6	ENSMUSG00000020018.6	Snrpf	chr10:93540631-93605245	WT_U	WT_D	OK	129.836	117.945	-0.138576	0.706271	0.30665	0.568357	no
ENSMUSG00000020020.7	ENSMUSG00000020020.7	Usp44	chr10:93831554-93848524	WT_U	WT_D	OK	6.04274	5.15641	-0.228836	1.13446	0.10515	0.279057	no
ENSMUSG00000020021.4	ENSMUSG00000020021.4	Fgd6	chr10:94036000-94145339	WT_U	WT_D	OK	3.66344	2.86389	-0.355223	1.71323	0.0102	0.0462376	yes
ENSMUSG00000020022.16	ENSMUSG00000020022.16	Ndufa12	chr10:94198954-94221443	WT_U	WT_D	OK	380.912	316.011	-0.269483	1.56307	0.02555	0.0960738	no
ENSMUSG00000020023.17	ENSMUSG00000020023.17	Tmcc3	chr10:94311948-94612084	WT_U	WT_D	OK	17.2489	15.7359	-0.132445	0.36863	0.56585	0.807706	no
ENSMUSG00000020024.6	ENSMUSG00000020024.6	Cep83	chr10:94688789-94790336	WT_U	WT_D	OK	42.6744	43.2783	0.020273	-0.118623	0.8643	0.954946	no
ENSMUSG00000020027.18	ENSMUSG00000020027.18	Socs2	chr10:95385361-95417180	WT_U	WT_D	OK	15.271	12.4971	-0.289201	1.0225	0.09895	0.267073	no
ENSMUSG00000020029.5	ENSMUSG00000020029.5	Nudt4	chr10:95547006-95564167	WT_U	WT_D	OK	27.1218	23.3065	-0.218721	1.27538	0.06625	0.199002	no
ENSMUSG00000020032.14	ENSMUSG00000020032.14	Nuak1	chr10:84370904-84440597	WT_U	WT_D	OK	4.23121	1.96071	-1.10969	5.45405	5e-05	0.00046241	yes
ENSMUSG00000020034.7	ENSMUSG00000020034.7	Tcp11l2	chr10:84576625-84614359	WT_U	WT_D	OK	1.72316	2.50645	0.540589	-2.33991	0.0009	0.00601451	yes
ENSMUSG00000020038.9	ENSMUSG00000020038.9	Cry1	chr10:85131701-85185054	WT_U	WT_D	OK	7.05513	10.9417	0.633092	-3.19328	5e-05	0.00046241	yes
ENSMUSG00000020044.13	ENSMUSG00000020044.13	Timp3	chr10:86055124-86498896	WT_U	WT_D	OK	2.25725	0.830062	-1.44328	5.42129	5e-05	0.00046241	yes
ENSMUSG00000020048.13	ENSMUSG00000020048.13	Hsp90b1	chr10:86685600-86705509	WT_U	WT_D	OK	441.631	419.412	-0.0744733	0.408489	0.54225	0.789955	no
ENSMUSG00000020056.16	ENSMUSG00000020056.16	Ccdc53	chr10:88201092-88246158	WT_U	WT_D	OK	29.0321	29.1479	0.00574301	-0.0284053	0.96665	0.98671	no
ENSMUSG00000020059.9	ENSMUSG00000020059.9	Sycp3	chr10:88452744-88504073	WT_U	WT_D	OK	0.091599	0.0966642	0.0776498	-0.0363829	0.96555	0.986301	no
ENSMUSG00000020063.16	ENSMUSG00000020063.16	Sirt1	chr10:63319004-63381704	WT_U	WT_D	OK	17.5014	17.0476	-0.0379017	0.174315	0.79985	0.932631	no
ENSMUSG00000020064.8	ENSMUSG00000020064.8	Herc4	chr10:63243067-63317881	WT_U	WT_D	OK	17.2004	14.8222	-0.214683	1.24761	0.07595	0.220166	no
ENSMUSG00000020067.7	ENSMUSG00000020067.7	Mypn	chr10:63115794-63203952	WT_U	WT_D	OK	0.193008	0.314453	0.704184	-2.55622	0.0006	0.00423598	yes
ENSMUSG00000020069.16	ENSMUSG00000020069.16	Hnrnph3	chr10:62980222-63024217	WT_U	WT_D	OK	60.7204	65.4939	0.109179	-0.4001	0.5561	0.800518	no
ENSMUSG00000020070.18	ENSMUSG00000020070.18	Rufy2	chr10:62980222-63024217	WT_U	WT_D	OK	25.1052	25.249	0.00824003	-0.021012	0.9738	0.98856	no
ENSMUSG00000020072.14	ENSMUSG00000020072.14	Pbld2	chr10:63061581-63077962	WT_U	WT_D	OK	2.02103	2.52671	0.322169	-0.982243	0.15755	0.370618	no
ENSMUSG00000020074.6	ENSMUSG00000020074.6	Ccar1	chr10:62743927-62792368	WT_U	WT_D	OK	62.7042	71.4091	0.187546	-1.09627	0.11685	0.301529	no
ENSMUSG00000020075.7	ENSMUSG00000020075.7	Ddx21	chr10:62580247-62602298	WT_U	WT_D	OK	137.405	130.383	-0.0756787	0.438516	0.5308	0.781306	no
ENSMUSG00000020076.6	ENSMUSG00000020076.6	Ddx50	chr10:62616022-62651218	WT_U	WT_D	OK	61.8183	64.3268	0.0573859	-0.336075	0.634	0.850099	no
ENSMUSG00000020078.15	ENSMUSG00000020078.15	Vps26a	chr10:62454842-62486805	WT_U	WT_D	OK	51.3905	49.3971	-0.0570753	0.334266	0.62875	0.847163	no
ENSMUSG00000020079.15	ENSMUSG00000020079.15	Supv3l1	chr10:62429208-62451322	WT_U	WT_D	OK	23.3796	23.3822	0.00016043	-0.000703038	0.9991	0.999419	no
ENSMUSG00000020080.8	ENSMUSG00000020080.8	Hkdc1	chr10:62383136-62422491	WT_U	WT_D	OK	0.35337	0.646494	0.871457	-2.65252	5e-05	0.00046241	yes
ENSMUSG00000020081.5	ENSMUSG00000020081.5	Tacr2	chr10:62252437-62265990	WT_U	WT_D	OK	0.234626	0.256085	0.12626	-0.359553	0.60795	0.834672	no
ENSMUSG00000020085.15	ENSMUSG00000020085.15	Aifm2	chr10:61715262-61784147	WT_U	WT_D	OK	8.07128	17.566	1.12192	-3.49901	5e-05	0.00046241	yes
ENSMUSG00000020086.6	ENSMUSG00000020086.6	H2afy2	chr10:61715262-61784147	WT_U	WT_D	OK	8.58108	10.8358	0.336575	-1.20726	0.08515	0.239463	no
ENSMUSG00000020087.4	ENSMUSG00000020087.4	Tysnd1	chr10:61695513-61702773	WT_U	WT_D	OK	17.4954	20.9424	0.259451	-1.32478	0.05815	0.180695	no
ENSMUSG00000020088.9	ENSMUSG00000020088.9	Sar1a	chr10:61680309-61693295	WT_U	WT_D	OK	58.7202	57.1048	-0.0402449	0.235662	0.73765	0.906808	no
ENSMUSG00000020089.8	ENSMUSG00000020089.8	Ppa1	chr10:61648551-61674168	WT_U	WT_D	OK	150.032	137.157	-0.129442	0.754327	0.2729	0.528004	no
ENSMUSG00000020091.14	ENSMUSG00000020091.14	Eif4ebp2	chr10:61432496-61452669	WT_U	WT_D	OK	52.0468	52.4976	0.012442	-0.0725957	0.91405	0.969781	no
ENSMUSG00000020092.8	ENSMUSG00000020092.8	Pald1	chr10:61319656-61383523	WT_U	WT_D	OK	4.1017	3.39971	-0.27081	1.34233	0.0555	0.174435	no
ENSMUSG00000020097.14	ENSMUSG00000020097.14	Sgpl1	chr10:61098641-61147703	WT_U	WT_D	OK	26.9565	32.8286	0.28432	-1.19375	0.06495	0.196144	no
ENSMUSG00000020098.6	ENSMUSG00000020098.6	Pcbd1	chr10:61089342-61094328	WT_U	WT_D	OK	54.5431	45.1934	-0.271285	1.37624	0.0476	0.15527	no
ENSMUSG00000020099.7	ENSMUSG00000020099.7	Unc5b	chr10:60762609-60831581	WT_U	WT_D	OK	46.5717	41.1513	-0.178516	1.04445	0.1356	0.334164	no
ENSMUSG00000020100.15	ENSMUSG00000020100.15	Slc29a3	chr10:60712071-60752794	WT_U	WT_D	OK	4.46872	4.56216	0.0298554	-0.123428	0.8398	0.946893	no
ENSMUSG00000020107.10	ENSMUSG00000020107.10	Anapc16	chr10:59987408-60099990	WT_U	WT_D	OK	85.6904	87.4337	0.0290559	-0.132141	0.84735	0.949585	no
ENSMUSG00000020108.3	ENSMUSG00000020108.3	Ddit4	chr10:59949674-59951770	WT_U	WT_D	OK	106.292	96.7357	-0.135913	0.795765	0.25475	0.50582	no
ENSMUSG00000020109.13	ENSMUSG00000020109.13	Dnajb12	chr10:59879555-59899302	WT_U	WT_D	OK	34.8812	41.3887	0.246787	-1.35774	0.0543	0.171584	no
ENSMUSG00000020111.15	ENSMUSG00000020111.15	Micu1	chr10:59702476-59864132	WT_U	WT_D	OK	45.4037	44.6717	-0.0234487	0.117742	0.86	0.953681	no
ENSMUSG00000020114.12	ENSMUSG00000020114.12	Cand1	chr10:119199254-119240055	WT_U	WT_D	OK	51.8426	48.8484	-0.0858268	0.194875	0.77035	0.9209	no
ENSMUSG00000020115.2	ENSMUSG00000020115.2	Tbk1	chr10:121546454-121586794	WT_U	WT_D	OK	32.9905	31.3627	-0.0730009	0.426442	0.54105	0.789228	no
ENSMUSG00000020116.7	ENSMUSG00000020116.7	Pno1	chr11:17159262-17233796	WT_U	WT_D	OK	65.7969	61.6154	-0.0947286	0.253826	0.7144	0.895778	no
ENSMUSG00000020120.15	ENSMUSG00000020120.15	Plek	chr11:16971205-17079371	WT_U	WT_D	OK	0.882175	1.22411	0.472596	-0.718803	0.2915	0.550377	no
ENSMUSG00000020121.15	ENSMUSG00000020121.15	Srgap1	chr10:121780967-122047315	WT_U	WT_D	OK	0.258678	0.409758	0.663615	-1.44657	0.0299	0.108549	no
ENSMUSG00000020122.16	ENSMUSG00000020122.16	Egfr	chr11:16752202-16918158	WT_U	WT_D	OK	1.81024	1.59115	-0.186111	0.432054	0.4848	0.744175	no
ENSMUSG00000020124.9	ENSMUSG00000020124.9	Usp15	chr10:123113243-123196971	WT_U	WT_D	OK	72.1084	67.4498	-0.0963532	0.564161	0.4129	0.681449	no
ENSMUSG00000020128.15	ENSMUSG00000020128.15	Vps54	chr11:21239280-21321136	WT_U	WT_D	OK	27.0542	24.3413	-0.152446	0.599058	0.35795	0.625498	no
ENSMUSG00000020130.8	ENSMUSG00000020130.8	Tbc1d15	chr10:115197876-115251493	WT_U	WT_D	OK	30.0818	29.5764	-0.0244444	0.142967	0.83615	0.945704	no
ENSMUSG00000020131.14	ENSMUSG00000020131.14	Pcsk4	chr10:80321282-80329498	WT_U	WT_D	OK	2.00285	2.23274	0.156761	-0.624744	0.37345	0.642046	no
ENSMUSG00000020132.9	ENSMUSG00000020132.9	Rab21	chr10:115289862-115315591	WT_U	WT_D	OK	46.9775	45.139	-0.0575955	0.33569	0.63135	0.848669	no
ENSMUSG00000020133.8	ENSMUSG00000020133.8	2310011J03Rik	chr10:80295976-80320537	WT_U	WT_D	OK	9.24739	9.12983	-0.0184582	0.0512912	0.9423	0.978685	no
ENSMUSG00000020134.13	ENSMUSG00000020134.13	Peli1	chr11:21091290-21150323	WT_U	WT_D	OK	28.6962	29.0504	0.0176983	-0.0990199	0.88805	0.962005	no
ENSMUSG00000020135.13	ENSMUSG00000020135.13	Apc2	chr10:80295976-80320537	WT_U	WT_D	OK	6.3274	7.35036	0.216202	-0.296682	0.6536	0.862085	no
ENSMUSG00000020137.4	ENSMUSG00000020137.4	Thap2	chr10:115369965-115384435	WT_U	WT_D	OK	5.33031	7.03414	0.400155	-2.00324	0.0046	0.0239676	yes
ENSMUSG00000020140.15	ENSMUSG00000020140.15	Lgr5	chr10:115450310-115587780	WT_U	WT_D	OK	12.0788	10.7882	-0.163023	0.671087	0.27885	0.534899	no
ENSMUSG00000020142.12	ENSMUSG00000020142.12	Slc1a4	chr11:20302179-20332713	WT_U	WT_D	OK	37.955	44.7428	0.237366	-1.39061	0.04755	0.155168	no
ENSMUSG00000020143.15	ENSMUSG00000020143.15	Dock2	chr11:34226814-34783892	WT_U	WT_D	OK	3.65526	2.34625	-0.639617	2.70221	5e-05	0.00046241	yes
ENSMUSG00000020149.17	ENSMUSG00000020149.17	Rab1a	chr11:20201431-20226856	WT_U	WT_D	OK	115.629	106.757	-0.115173	0.61221	0.37355	0.642108	no
ENSMUSG00000020150.13	ENSMUSG00000020150.13	Gamt	chr10:80258150-80261012	WT_U	WT_D	OK	8.4129	5.57849	-0.592729	2.70875	0.00015	0.00125317	yes
ENSMUSG00000020151.16	ENSMUSG00000020151.16	Ptprr	chr10:116018212-116274932	WT_U	WT_D	OK	1.79367	1.32362	-0.438425	1.95451	0.0042	0.0222068	yes
ENSMUSG00000020152.7	ENSMUSG00000020152.7	Actr2	chr11:20062303-20112913	WT_U	WT_D	OK	93.4943	85.3954	-0.13072	0.75834	0.2756	0.531146	no
ENSMUSG00000020153.14	ENSMUSG00000020153.14	Ndufs7	chr10:80249120-80256794	WT_U	WT_D	OK	61.233	55.7313	-0.135822	0.685329	0.31555	0.578358	no
ENSMUSG00000020154.9	ENSMUSG00000020154.9	Ptprb	chr10:116301373-116389538	WT_U	WT_D	OK	0.0695787	0.0991767	0.511355	-1.75058	0.0131	0.0565512	no
ENSMUSG00000020156.16	ENSMUSG00000020156.16	Mum1	chr10:80226433-80243903	WT_U	WT_D	OK	31.6886	27.2054	-0.220071	1.02796	0.13415	0.331553	no
ENSMUSG00000020160.18	ENSMUSG00000020160.18	Meis1	chr11:18879816-19018985	WT_U	WT_D	OK	6.86787	17.0811	1.31447	-6.24953	5e-05	0.00046241	yes
ENSMUSG00000020163.12	ENSMUSG00000020163.12	Uqcr11	chr10:80402996-80406830	WT_U	WT_D	OK	158.033	133.804	-0.240105	1.22118	0.082	0.232965	no
ENSMUSG00000020166.14	ENSMUSG00000020166.14	Cnot2	chr10:116485160-116583515	WT_U	WT_D	OK	75.7913	77.4429	0.0311007	-0.131597	0.83685	0.945983	no
ENSMUSG00000020167.14	ENSMUSG00000020167.14	Tcf3	chr10:80409513-80433647	WT_U	WT_D	OK	24.9095	23.1024	-0.108653	0.577747	0.388	0.657116	no
ENSMUSG00000020170.3	ENSMUSG00000020170.3	Frs2	chr10:117070128-117148474	WT_U	WT_D	OK	16.5585	15.6895	-0.0777726	0.45419	0.51525	0.769381	no
ENSMUSG00000020171.7	ENSMUSG00000020171.7	Yeats4	chr10:117215141-117224507	WT_U	WT_D	OK	58.7713	60.6745	0.0459785	-0.267925	0.70375	0.890635	no
ENSMUSG00000020175.13	ENSMUSG00000020175.13	Rab36	chr10:75037057-75054748	WT_U	WT_D	OK	4.83978	5.38527	0.154077	-0.447929	0.5128	0.767341	no
ENSMUSG00000020176.17	ENSMUSG00000020176.17	Grb10	chr11:11930507-12038683	WT_U	WT_D	OK	0.583135	0.968888	0.7325	-1.59035	0.0076	0.0363372	yes
ENSMUSG00000020178.5	ENSMUSG00000020178.5	Adora2a	chr10:75316942-75334788	WT_U	WT_D	OK	12.0793	10.0943	-0.258996	1.30747	0.0614	0.188134	no
ENSMUSG00000020180.9	ENSMUSG00000020180.9	Snrpd3	chr10:75351110-75537373	WT_U	WT_D	OK	388.216	319.007	-0.283271	1.26704	0.07205	0.211684	no
ENSMUSG00000020181.15	ENSMUSG00000020181.15	Nav3	chr10:109682659-110456204	WT_U	WT_D	OK	4.56008	4.57752	0.00550705	-0.0108887	0.9877	0.99396	no
ENSMUSG00000020182.16	ENSMUSG00000020182.16	Ddc	chr11:11814100-11898144	WT_U	WT_D	OK	12.3076	10.9941	-0.16282	0.662325	0.34075	0.607089	no
ENSMUSG00000020183.11	ENSMUSG00000020183.11	Cpm	chr10:117629499-117687352	WT_U	WT_D	OK	3.58969	4.81402	0.423383	-1.83606	0.00955	0.0438064	yes
ENSMUSG00000020184.14	ENSMUSG00000020184.14	Mdm2	chr10:117688887-117710758	WT_U	WT_D	OK	69.6969	74.0871	0.0881279	-0.36872	0.58315	0.818444	no
ENSMUSG00000020185.16	ENSMUSG00000020185.16	E2f7	chr10:110745438-110896550	WT_U	WT_D	OK	21.418	16.6402	-0.364151	1.20347	0.0649	0.196023	no
ENSMUSG00000020186.6	ENSMUSG00000020186.6	Csrp2	chr10:110920176-110939599	WT_U	WT_D	OK	42.9969	30.5846	-0.491427	2.48738	0.00045	0.00330168	yes
ENSMUSG00000020189.13	ENSMUSG00000020189.13	Osbpl8	chr10:111164801-111297247	WT_U	WT_D	OK	16.8315	16.3167	-0.0448144	0.262818	0.7058	0.891672	no
ENSMUSG00000020190.13	ENSMUSG00000020190.13	Mknk2	chr10:80665326-80678112	WT_U	WT_D	OK	19.3889	19.8663	0.0350922	-0.109365	0.86565	0.955365	no
ENSMUSG00000020196.9	ENSMUSG00000020196.9	Cabin1	chr10:75646109-75764357	WT_U	WT_D	OK	15.1803	14.8621	-0.0305623	0.178804	0.7965	0.931456	no
ENSMUSG00000020198.7	ENSMUSG00000020198.7	Ap3d1	chr10:80706977-80742211	WT_U	WT_D	OK	46.1393	47.2149	0.0332461	-0.194616	0.7867	0.927659	no
ENSMUSG00000020205.8	ENSMUSG00000020205.8	Phlda1	chr10:111506285-111508645	WT_U	WT_D	OK	41.9681	39.9208	-0.0721525	0.372564	0.5654	0.807386	no
ENSMUSG00000020211.15	ENSMUSG00000020211.15	Sf3a2	chr10:80796099-80804924	WT_U	WT_D	OK	100.084	92.3529	-0.115982	0.495331	0.46495	0.727446	no
ENSMUSG00000020212.13	ENSMUSG00000020212.13	Mdm1	chr10:118141786-118168997	WT_U	WT_D	OK	44.4239	32.0869	-0.469352	2.75206	5e-05	0.00046241	yes
ENSMUSG00000020213.6	ENSMUSG00000020213.6	Glipr1l1	chr10:112060188-112078510	WT_U	WT_D	OK	0.190439	0.129801	-0.553027	0.848593	0.2218	0.464747	no
ENSMUSG00000020216.13	ENSMUSG00000020216.13	Jsrp1	chr10:80808495-80813498	WT_U	WT_D	OK	1.61823	1.96153	0.277563	-1.02155	0.1385	0.339042	no
ENSMUSG00000020219.6	ENSMUSG00000020219.6	Timm13	chr10:80899449-80900969	WT_U	WT_D	OK	74.045	67.8845	-0.12532	0.730173	0.2933	0.552578	no
ENSMUSG00000020220.16	ENSMUSG00000020220.16	Vps13d	chr4:144972621-145195005	WT_U	WT_D	OK	9.07276	12.1988	0.427126	-0.935021	0.1839	0.411246	no
ENSMUSG00000020224.14	ENSMUSG00000020224.14	Llph	chr10:120227069-120232071	WT_U	WT_D	OK	40.9506	40.5665	-0.0135958	0.0685666	0.9222	0.97259	no
ENSMUSG00000020225.10	ENSMUSG00000020225.10	Tmbim4	chr10:120141647-120224917	WT_U	WT_D	OK	54.0834	53.3398	-0.0199734	0.0876292	0.89875	0.965187	no
ENSMUSG00000020227.10	ENSMUSG00000020227.10	Irak3	chr10:120141647-120224917	WT_U	WT_D	OK	1.71412	1.68717	-0.0228628	0.0394997	0.9521	0.981822	no
ENSMUSG00000020228.11	ENSMUSG00000020228.11	Helb	chr10:119429366-120112987	WT_U	WT_D	OK	10.2638	7.46964	-0.458454	1.07928	0.1136	0.295364	no
ENSMUSG00000020230.14	ENSMUSG00000020230.14	Prmt2	chr10:76207221-76237865	WT_U	WT_D	OK	19.3514	22.7391	0.232737	-1.17209	0.09495	0.259125	no
ENSMUSG00000020231.15	ENSMUSG00000020231.15	Dip2a	chr10:76253852-76345291	WT_U	WT_D	OK	10.2243	8.82332	-0.212609	0.623984	0.3556	0.622912	no
ENSMUSG00000020232.17	ENSMUSG00000020232.17	Hmg20b	chr10:81346047-81350480	WT_U	WT_D	OK	54.8437	71.5459	0.383543	-1.86513	0.00675	0.032983	yes
ENSMUSG00000020234.10	ENSMUSG00000020234.10	4930404N11Rik	chr10:81357490-81378516	WT_U	WT_D	OK	0.21135	0.169898	-0.314965	0.0629266	0.7946	0.930466	no
ENSMUSG00000020235.16	ENSMUSG00000020235.16	Fzr1	chr10:81357490-81378516	WT_U	WT_D	OK	28.8657	31.077	0.106491	-0.496709	0.46625	0.728547	no
ENSMUSG00000020238.14	ENSMUSG00000020238.14	Ncln	chr10:81486248-81496392	WT_U	WT_D	OK	52.5869	49.5708	-0.0852129	0.33369	0.6153	0.839163	no
ENSMUSG00000020246.13	ENSMUSG00000020246.13	Hcfc2	chr10:82696159-82742428	WT_U	WT_D	OK	24.8271	29.6375	0.255508	-0.759487	0.26375	0.51703	no
ENSMUSG00000020248.18	ENSMUSG00000020248.18	Nfyb	chr10:82748700-82764144	WT_U	WT_D	OK	34.6198	38.5565	0.155377	-0.535355	0.42985	0.69685	no
ENSMUSG00000020250.9	ENSMUSG00000020250.9	Txnrd1	chr10:82859205-82897724	WT_U	WT_D	OK	99.7043	166.703	0.741552	-4.31605	5e-05	0.00046241	yes
ENSMUSG00000020251.13	ENSMUSG00000020251.13	Glt8d2	chr10:82629827-82690650	WT_U	WT_D	OK	1.03	1.24146	0.269393	-0.2413	0.6408	0.854346	no
ENSMUSG00000020253.14	ENSMUSG00000020253.14	Ppm1m	chr9:106194171-106199746	WT_U	WT_D	OK	6.36655	5.0412	-0.336745	1.14802	0.09785	0.264925	no
ENSMUSG00000020255.7	ENSMUSG00000020255.7	D10Wsu102e	chr10:83360220-83368835	WT_U	WT_D	OK	40.0094	36.4659	-0.133791	0.782997	0.26485	0.518425	no
ENSMUSG00000020256.14	ENSMUSG00000020256.14	Aldh1l2	chr10:83487449-83534140	WT_U	WT_D	OK	32.8759	62.6179	0.929545	-3.66344	5e-05	0.00046241	yes
ENSMUSG00000020257.12	ENSMUSG00000020257.12	Wdr82	chr9:106170927-106191136	WT_U	WT_D	OK	30.686	32.6638	0.090112	-0.344751	0.61635	0.839784	no
ENSMUSG00000020258.15	ENSMUSG00000020258.15	Glyctk	chr9:106148686-106160201	WT_U	WT_D	OK	0.775159	0.84316	0.121314	-0.46512	0.4735	0.734652	no
ENSMUSG00000020260.8	ENSMUSG00000020260.8	Pofut2	chr10:77259299-77269586	WT_U	WT_D	OK	34.0339	32.1192	-0.0835365	0.486287	0.4919	0.750246	no
ENSMUSG00000020261.15	ENSMUSG00000020261.15	Slc36a1	chr11:55204349-55236330	WT_U	WT_D	OK	26.7212	21.042	-0.344713	1.93055	0.0047	0.0243998	yes
ENSMUSG00000020262.15	ENSMUSG00000020262.15	Adarb1	chr10:77290725-77418270	WT_U	WT_D	OK	12.9965	10.2793	-0.338381	1.14737	0.0909	0.250984	no
ENSMUSG00000020263.14	ENSMUSG00000020263.14	Appl2	chr10:83600032-83648738	WT_U	WT_D	OK	10.934	10.6182	-0.0422821	0.146533	0.8301	0.943658	no
ENSMUSG00000020265.15	ENSMUSG00000020265.15	Sumo3	chr10:77606096-77645993	WT_U	WT_D	OK	235.565	225.091	-0.0656168	0.235187	0.7336	0.905043	no
ENSMUSG00000020267.6	ENSMUSG00000020267.6	Hint1	chr11:54866382-54870501	WT_U	WT_D	OK	576.265	644.348	0.161108	-0.942246	0.17275	0.394293	no
ENSMUSG00000020268.13	ENSMUSG00000020268.13	Lyrm7	chr11:54826865-54860916	WT_U	WT_D	OK	1.47062	1.63516	0.153007	-0.32586	0.61275	0.837658	no
ENSMUSG00000020271.17	ENSMUSG00000020271.17	Fbxw11	chr11:32642723-32746816	WT_U	WT_D	OK	43.1061	43.0966	-0.000317985	0.000778198	0.9992	0.999459	no
ENSMUSG00000020272.8	ENSMUSG00000020272.8	Stk10	chr11:32533304-32624587	WT_U	WT_D	OK	4.63456	4.57341	-0.0191621	0.0802957	0.89815	0.965075	no
ENSMUSG00000020273.13	ENSMUSG00000020273.13	Papolg	chr11:23862645-23895488	WT_U	WT_D	OK	10.9954	11.7821	0.0996966	-0.493033	0.4754	0.736061	no
ENSMUSG00000020275.9	ENSMUSG00000020275.9	Rel	chr11:23736846-23770970	WT_U	WT_D	OK	3.95255	2.75221	-0.522193	2.63173	0.0001	0.000870202	yes
ENSMUSG00000020277.9	ENSMUSG00000020277.9	Pfkl	chr10:77986946-78010083	WT_U	WT_D	OK	56.8499	34.9875	-0.700318	3.72777	5e-05	0.00046241	yes
ENSMUSG00000020279.10	ENSMUSG00000020279.10	Il9r	chr11:32187540-32200279	WT_U	WT_D	OK	0.0807617	0.12527	0.633298	-0.846535	0.1949	0.42758	no
ENSMUSG00000020280.12	ENSMUSG00000020280.12	Pus10	chr11:23646478-23732876	WT_U	WT_D	OK	41.2801	41.2919	0.000412338	-0.00108576	0.9992	0.999459	no
ENSMUSG00000020282.18	ENSMUSG00000020282.18	Rhbdf1	chr11:32209584-32222300	WT_U	WT_D	OK	19.4214	11.6988	-0.731287	2.45441	0.0003	0.00231843	yes
ENSMUSG00000020283.5	ENSMUSG00000020283.5	Pex13	chr11:23646478-23732876	WT_U	WT_D	OK	11.38	11.543	0.0205177	-0.0431359	0.92015	0.971818	no
ENSMUSG00000020284.16	ENSMUSG00000020284.16	1810043G02Rik	chr10:77978523-77986905	WT_U	WT_D	OK	10.9191	10.7017	-0.029014	0.115004	0.86745	0.955857	no
ENSMUSG00000020286.12	ENSMUSG00000020286.12	1700093K21Rik	chr11:23516202-23521155	WT_U	WT_D	OK	0.08536	0.02121	-2.00882	1.08705	0.0285	0.104668	no
ENSMUSG00000020287.15	ENSMUSG00000020287.15	Mpg	chr11:32225627-32267707	WT_U	WT_D	OK	14.0353	13.3368	-0.0736474	0.237615	0.7348	0.905709	no
ENSMUSG00000020288.13	ENSMUSG00000020288.13	Ahsa2	chr11:23306894-23499661	WT_U	WT_D	OK	89.233	93.0007	0.0596642	-0.114202	0.86525	0.955166	no
ENSMUSG00000020289.15	ENSMUSG00000020289.15	Nprl3	chr11:32225627-32267707	WT_U	WT_D	OK	22.2802	20.2938	-0.134723	0.408263	0.54305	0.790557	no
ENSMUSG00000020290.14	ENSMUSG00000020290.14	Xpo1	chr11:23256040-23298249	WT_U	WT_D	OK	169.31	157.025	-0.108673	0.605228	0.3791	0.647924	no
ENSMUSG00000020297.10	ENSMUSG00000020297.10	Nsg2	chr11:32000462-32059202	WT_U	WT_D	OK	42.2631	35.4589	-0.253251	1.46543	0.03695	0.127931	no
ENSMUSG00000020300.14	ENSMUSG00000020300.14	Cpeb4	chr11:31872210-31935634	WT_U	WT_D	OK	24.8375	29.1244	0.229708	-1.25383	0.0712	0.209758	no
ENSMUSG00000020303.2	ENSMUSG00000020303.2	Stc2	chr11:31357306-31370074	WT_U	WT_D	OK	12.578	21.0353	0.74191	-3.53094	5e-05	0.00046241	yes
ENSMUSG00000020305.13	ENSMUSG00000020305.13	Asb3	chr11:30885357-31102704	WT_U	WT_D	OK	6.38201	7.63682	0.258961	-0.637376	0.3607	0.628549	no
ENSMUSG00000020307.14	ENSMUSG00000020307.14	Cdc34	chr10:79682194-79688394	WT_U	WT_D	OK	103.005	100.078	-0.0415895	0.241552	0.72885	0.902963	no
ENSMUSG00000020308.5	ENSMUSG00000020308.5	Tpgs1	chr10:79669409-79676126	WT_U	WT_D	OK	24.4133	30.194	0.306595	-1.54627	0.0263	0.0983	no
ENSMUSG00000020309.6	ENSMUSG00000020309.6	Chac2	chr11:30885357-31102704	WT_U	WT_D	OK	9.16172	9.37177	0.0327031	-0.0661733	0.9239	0.973173	no
ENSMUSG00000020310.8	ENSMUSG00000020310.8	Madcam1	chr10:79664573-79668536	WT_U	WT_D	OK	0.665177	0.268194	-1.31046	3.62603	5e-05	0.00046241	yes
ENSMUSG00000020311.17	ENSMUSG00000020311.17	Erlec1	chr11:30885357-31102704	WT_U	WT_D	OK	30.1318	32.9169	0.127542	-0.443859	0.514	0.768385	no
ENSMUSG00000020315.18	ENSMUSG00000020315.18	Sptbn1	chr11:30099394-30280491	WT_U	WT_D	OK	90.2036	86.5046	-0.0604082	0.322544	0.6261	0.8454	no
ENSMUSG00000020319.9	ENSMUSG00000020319.9	Wdpcp	chr11:21556786-21898989	WT_U	WT_D	OK	4.27069	3.51923	-0.279209	0.181446	0.696	0.886092	no
ENSMUSG00000020321.15	ENSMUSG00000020321.15	Mdh1	chr11:21556786-21898989	WT_U	WT_D	OK	160.702	149.818	-0.101177	0.418282	0.5475	0.794128	no
ENSMUSG00000020325.10	ENSMUSG00000020325.10	Fstl3	chr10:79777271-79790961	WT_U	WT_D	OK	5.10328	2.56679	-0.99146	4.34258	5e-05	0.00046241	yes
ENSMUSG00000020326.7	ENSMUSG00000020326.7	Ccng1	chr11:40748551-40755311	WT_U	WT_D	OK	14.6218	12.4614	-0.230655	1.17981	0.08595	0.241104	no
ENSMUSG00000020327.3	ENSMUSG00000020327.3	Fgf22	chr10:79755118-79756961	WT_U	WT_D	OK	0.908394	0.464849	-0.966556	1.83087	0.015	0.0630686	no
ENSMUSG00000020328.10	ENSMUSG00000020328.10	Nudcd2	chr11:40733666-40740046	WT_U	WT_D	OK	136.022	128.647	-0.0804222	0.383713	0.58335	0.818599	no
ENSMUSG00000020329.12	ENSMUSG00000020329.12	Polrmt	chr10:79736122-79746581	WT_U	WT_D	OK	16.7531	15.644	-0.0988186	0.306465	0.57825	0.815164	no
ENSMUSG00000020330.16	ENSMUSG00000020330.16	Hmmr	chr11:40701394-40733422	WT_U	WT_D	OK	39.3833	39.186	-0.00724569	0.0384678	0.9515	0.981668	no
ENSMUSG00000020331.9	ENSMUSG00000020331.9	Hcn2	chr10:79716633-79736108	WT_U	WT_D	OK	21.1797	19.7555	-0.100428	0.588858	0.40095	0.669888	no
ENSMUSG00000020333.17	ENSMUSG00000020333.17	Acsl6	chr11:54303797-54364756	WT_U	WT_D	OK	16.3408	12.5451	-0.381355	1.82589	0.00855	0.0400349	yes
ENSMUSG00000020334.6	ENSMUSG00000020334.6	Slc22a4	chr11:53983122-54028090	WT_U	WT_D	OK	0.328939	0.552664	0.748583	-1.32129	0.05465	0.172375	no
ENSMUSG00000020335.13	ENSMUSG00000020335.13	Zfp354b	chr11:50921822-50931633	WT_U	WT_D	OK	0.154393	0.181004	0.229414	-0.444753	0.50025	0.756967	no
ENSMUSG00000020340.16	ENSMUSG00000020340.16	Cyfip2	chr11:46193849-46312859	WT_U	WT_D	OK	8.72477	9.93427	0.187297	-1.08197	0.12355	0.313585	no
ENSMUSG00000020346.16	ENSMUSG00000020346.16	Mgat1	chr11:49244190-49263030	WT_U	WT_D	OK	11.4741	10.9473	-0.0678059	0.223193	0.7192	0.898339	no
ENSMUSG00000020349.4	ENSMUSG00000020349.4	Ppp2ca	chr11:51949881-52286179	WT_U	WT_D	OK	63.0968	63.559	0.0105296	-0.0380046	0.9503	0.981288	no
ENSMUSG00000020358.17	ENSMUSG00000020358.17	Hnrnpab	chr11:51584756-51606847	WT_U	WT_D	OK	1089.95	1081.53	-0.0111883	0.0539437	0.93755	0.977328	no
ENSMUSG00000020359.13	ENSMUSG00000020359.13	Phykpl	chr11:51584756-51606847	WT_U	WT_D	OK	5.46032	4.92827	-0.147904	0.0523638	0.83565	0.945534	no
ENSMUSG00000020361.13	ENSMUSG00000020361.13	Hspa4	chr11:53259813-53300457	WT_U	WT_D	OK	249.52	227.795	-0.131419	0.436995	0.53575	0.784925	no
ENSMUSG00000020362.13	ENSMUSG00000020362.13	Cnot6	chr11:49671502-49712723	WT_U	WT_D	OK	84.7899	79.8115	-0.0872958	0.428388	0.5098	0.764983	no
ENSMUSG00000020363.6	ENSMUSG00000020363.6	Gfpt2	chr11:49794177-49838613	WT_U	WT_D	OK	0.919216	1.45272	0.660281	-2.84676	5e-05	0.00046241	yes
ENSMUSG00000020364.14	ENSMUSG00000020364.14	Zfp354a	chr11:51059256-51072799	WT_U	WT_D	OK	7.36545	7.86666	0.0949776	-0.287341	0.67305	0.873029	no
ENSMUSG00000020366.18	ENSMUSG00000020366.18	Mapk9	chr11:49846750-49886421	WT_U	WT_D	OK	34.3658	35.7569	0.0572481	-0.260319	0.7082	0.892858	no
ENSMUSG00000020368.15	ENSMUSG00000020368.15	Canx	chr11:50293960-50325673	WT_U	WT_D	OK	523.479	490.202	-0.0947553	0.351803	0.60895	0.83529	no
ENSMUSG00000020372.15	ENSMUSG00000020372.15	Gnb2l1	chr11:48800331-48817353	WT_U	WT_D	OK	1147.27	1232.85	0.103792	-0.47653	0.4922	0.750521	no
ENSMUSG00000020374.16	ENSMUSG00000020374.16	Rasgef1c	chr11:49901834-49980994	WT_U	WT_D	OK	0.0746727	0.155306	1.05646	-1.66013	0.01235	0.0539011	no
ENSMUSG00000020375.9	ENSMUSG00000020375.9	Rufy1	chr11:50389285-50431125	WT_U	WT_D	OK	11.0606	11.5589	0.0635745	-0.283919	0.68105	0.877521	no
ENSMUSG00000020380.16	ENSMUSG00000020380.16	Rad50	chr11:53649518-53707319	WT_U	WT_D	OK	32.8868	32.1787	-0.0314026	0.154984	0.804	0.933855	no
ENSMUSG00000020381.10	ENSMUSG00000020381.10	3010026O09Rik	chr11:50174443-50210827	WT_U	WT_D	OK	13.1534	14.5726	0.147823	-0.134428	0.839	0.946705	no
ENSMUSG00000020385.16	ENSMUSG00000020385.16	Clk4	chr11:51253650-51281766	WT_U	WT_D	OK	43.8357	50.5954	0.2069	-0.875824	0.20805	0.446276	no
ENSMUSG00000020386.5	ENSMUSG00000020386.5	Sar1b	chr11:51763686-51791925	WT_U	WT_D	OK	44.4556	43.0468	-0.0464592	0.236508	0.7296	0.903233	no
ENSMUSG00000020387.15	ENSMUSG00000020387.15	Jade2	chr11:51813454-51857653	WT_U	WT_D	OK	7.58725	6.69158	-0.18123	0.926421	0.1861	0.414408	no
ENSMUSG00000020389.18	ENSMUSG00000020389.18	Cdkl3	chr11:51949881-52286179	WT_U	WT_D	OK	18.6676	18.7923	0.00960519	-0.00482116	0.9947	0.997368	no
ENSMUSG00000020390.12	ENSMUSG00000020390.12	Ube2b	chr11:51949881-52286179	WT_U	WT_D	OK	88.6865	92.1551	0.0553495	-0.0724344	0.91225	0.969319	no
ENSMUSG00000020392.8	ENSMUSG00000020392.8	Cdkn2aipnl	chr11:51949881-52286179	WT_U	WT_D	OK	45.0567	45.0394	-0.000554045	0.000924853	0.999	0.999379	no
ENSMUSG00000020393.16	ENSMUSG00000020393.16	Kremen1	chr11:5191551-5261558	WT_U	WT_D	OK	12.8852	8.81714	-0.547332	2.94279	5e-05	0.00046241	yes
ENSMUSG00000020396.8	ENSMUSG00000020396.8	Nefh	chr11:4938753-4948064	WT_U	WT_D	OK	52.1243	47.3318	-0.139146	0.814863	0.2469	0.496351	no
ENSMUSG00000020397.15	ENSMUSG00000020397.15	Med7	chr11:46436924-46447248	WT_U	WT_D	OK	41.7348	42.713	0.0334244	-0.144126	0.8363	0.945756	no
ENSMUSG00000020400.17	ENSMUSG00000020400.17	Tnip1	chr11:54910784-54962917	WT_U	WT_D	OK	18.2282	13.3628	-0.44795	1.60922	0.01315	0.0567133	no
ENSMUSG00000020402.11	ENSMUSG00000020402.11	Vdac1	chr11:52360859-52389397	WT_U	WT_D	OK	359.451	310.101	-0.213057	1.10208	0.1106	0.28954	no
ENSMUSG00000020407.13	ENSMUSG00000020407.13	Upp1	chr11:9118102-9136170	WT_U	WT_D	OK	7.02617	4.64748	-0.59629	2.2878	0.0011	0.00713086	yes
ENSMUSG00000020409.10	ENSMUSG00000020409.10	Slu7	chr11:43433743-43447981	WT_U	WT_D	OK	36.7717	42.8091	0.219322	-1.11021	0.0936	0.256306	no
ENSMUSG00000020411.2	ENSMUSG00000020411.2	Nipal4	chr11:46148154-46166508	WT_U	WT_D	OK	0.105541	0.176808	0.74438	-2.00785	0.00645	0.0317759	yes
ENSMUSG00000020412.16	ENSMUSG00000020412.16	Ascc2	chr11:4637746-4685699	WT_U	WT_D	OK	31.1616	40.9236	0.393164	-2.19334	0.00195	0.0116367	yes
ENSMUSG00000020413.11	ENSMUSG00000020413.11	Hus1	chr11:8993136-9011191	WT_U	WT_D	OK	7.37376	7.26116	-0.0222004	0.0888547	0.88485	0.96112	no
ENSMUSG00000020415.16	ENSMUSG00000020415.16	Pttg1	chr11:43420249-43426251	WT_U	WT_D	OK	73.4109	56.7983	-0.370147	1.75333	0.0122	0.053372	no
ENSMUSG00000020420.8	ENSMUSG00000020420.8	Zfp607	chr7:27857526-27880825	WT_U	WT_D	OK	1.81203	1.44975	-0.321803	1.47812	0.03605	0.125605	no
ENSMUSG00000020423.6	ENSMUSG00000020423.6	Btg2	chr1:134075169-134079120	WT_U	WT_D	OK	3.28677	3.41226	0.0540571	-0.258421	0.7076	0.892618	no
ENSMUSG00000020424.3	ENSMUSG00000020424.3	Gatsl3	chr11:4218224-4222409	WT_U	WT_D	OK	0.917075	0.561466	-0.707841	2.42269	0.0013	0.00823191	yes
ENSMUSG00000020430.12	ENSMUSG00000020430.12	Pes1	chr11:3937540-3980004	WT_U	WT_D	OK	93.9961	86.1438	-0.125854	0.458468	0.5087	0.763996	no
ENSMUSG00000020432.12	ENSMUSG00000020432.12	Tcn2	chr11:3917191-3932159	WT_U	WT_D	OK	3.62113	4.12252	0.187087	-0.875367	0.20985	0.448687	no
ENSMUSG00000020434.4	ENSMUSG00000020434.4	4921536K21Rik	chr11:3886087-3895098	WT_U	WT_D	OK	0.0947266	0.127758	0.431572	-0.966179	0.16875	0.387743	no
ENSMUSG00000020435.17	ENSMUSG00000020435.17	Osbp2	chr11:3703730-3863903	WT_U	WT_D	OK	0.0217851	0.198155	3.18522	-1.78125	0.0059	0.0295015	yes
ENSMUSG00000020437.12	ENSMUSG00000020437.12	Myo1g	chr11:6506547-6520965	WT_U	WT_D	OK	0.0910937	0.044542	-1.03218	0.603798	0.2014	0.43715	no
ENSMUSG00000020439.17	ENSMUSG00000020439.17	Smtn	chr11:3517522-3540612	WT_U	WT_D	OK	11.8985	7.86124	-0.597951	2.05295	0.00255	0.0146165	yes
ENSMUSG00000020440.13	ENSMUSG00000020440.13	Arf5	chr6:28416090-28438622	WT_U	WT_D	OK	80.2444	73.4284	-0.128063	0.591017	0.3981	0.667185	no
ENSMUSG00000020441.6	ENSMUSG00000020441.6	2310033P09Rik	chr11:59208245-59210738	WT_U	WT_D	OK	27.8998	26.3049	-0.0849232	0.429479	0.53935	0.787804	no
ENSMUSG00000020444.19	ENSMUSG00000020444.19	Guk1	chr11:59183874-59192212	WT_U	WT_D	OK	77.1436	73.3805	-0.0721497	0.403152	0.5587	0.80237	no
ENSMUSG00000020447.5	ENSMUSG00000020447.5	Npc1l1	chr11:6211012-6230143	WT_U	WT_D	OK	0.0945078	0.079231	-0.254368	0.647614	0.3551	0.622374	no
ENSMUSG00000020448.16	ENSMUSG00000020448.16	Rnf185	chr11:3415981-3452363	WT_U	WT_D	OK	10.7139	14.2127	0.407697	-2.01658	0.0026	0.0148564	yes
ENSMUSG00000020451.17	ENSMUSG00000020451.17	Limk2	chr11:3344255-3409189	WT_U	WT_D	OK	21.1652	17.0794	-0.309437	1.09793	0.081	0.230903	no
ENSMUSG00000020453.17	ENSMUSG00000020453.17	Patz1	chr11:3288873-3342971	WT_U	WT_D	OK	23.7267	25.8484	0.123564	-0.515797	0.44235	0.707894	no
ENSMUSG00000020454.17	ENSMUSG00000020454.17	Eif4enif1	chr11:3131849-3266415	WT_U	WT_D	OK	59.8619	54.2871	-0.141029	0.359987	0.5318	0.782112	no
ENSMUSG00000020455.16	ENSMUSG00000020455.16	Trim11	chr11:58978092-58991458	WT_U	WT_D	OK	10.7202	10.6018	-0.0160226	0.0791744	0.90775	0.967914	no
ENSMUSG00000020456.17	ENSMUSG00000020456.17	Ogdh	chr11:6291632-6356642	WT_U	WT_D	OK	64.8564	59.7545	-0.118202	0.60259	0.34225	0.608787	no
ENSMUSG00000020457.13	ENSMUSG00000020457.13	Drg1	chr11:3131849-3266415	WT_U	WT_D	OK	122.106	115.426	-0.0811659	0.279856	0.6821	0.878118	no
ENSMUSG00000020458.16	ENSMUSG00000020458.16	Rtn4	chr11:29692946-30026033	WT_U	WT_D	OK	207.026	200.656	-0.0450877	0.212763	0.76335	0.917722	no
ENSMUSG00000020459.14	ENSMUSG00000020459.14	Mtif2	chr11:29526407-29545279	WT_U	WT_D	OK	14.956	15.1294	0.0166304	-0.0746505	0.9145	0.96994	no
ENSMUSG00000020460.15	ENSMUSG00000020460.15	Rps27a	chr11:29545845-29578367	WT_U	WT_D	OK	1491.36	1510.75	0.0186364	-0.105736	0.8808	0.959947	no
ENSMUSG00000020461.9	ENSMUSG00000020461.9	Clhc1	chr11:29545845-29578367	WT_U	WT_D	OK	0.342792	0.286608	-0.258255	0.0356255	0.86815	0.956018	no
ENSMUSG00000020462.14	ENSMUSG00000020462.14	Cfap36	chr11:29221531-29247409	WT_U	WT_D	OK	58.9748	64.7924	0.135726	-0.721128	0.29555	0.555292	no
ENSMUSG00000020463.15	ENSMUSG00000020463.15	Smek2	chr11:29170908-29220797	WT_U	WT_D	OK	30.7503	33.3415	0.116719	-0.487473	0.4596	0.723253	no
ENSMUSG00000020464.15	ENSMUSG00000020464.15	Pnpt1	chr11:29130743-29161828	WT_U	WT_D	OK	55.2035	57.3181	0.054231	-0.193997	0.77415	0.922416	no
ENSMUSG00000020469.8	ENSMUSG00000020469.8	Myl7	chr11:5896636-5898782	WT_U	WT_D	OK	0.0740243	0.135179	0.8688	-0.833953	0.2586	0.51042	no
ENSMUSG00000020471.11	ENSMUSG00000020471.11	Pold2	chr11:5872179-5878292	WT_U	WT_D	OK	63.9367	60.559	-0.0783029	0.449238	0.51375	0.768206	no
ENSMUSG00000020472.14	ENSMUSG00000020472.14	Zkscan17	chr11:59485519-59526751	WT_U	WT_D	OK	43.5848	50.0971	0.200902	-1.01295	0.1074	0.283518	no
ENSMUSG00000020473.13	ENSMUSG00000020473.13	Aebp1	chr11:5861946-5872088	WT_U	WT_D	OK	25.6793	24.9099	-0.0438866	0.224561	0.7416	0.90848	no
ENSMUSG00000020474.11	ENSMUSG00000020474.11	Polm	chr11:5827859-5838016	WT_U	WT_D	OK	4.96227	4.41625	-0.168178	0.533576	0.43175	0.698461	no
ENSMUSG00000020475.3	ENSMUSG00000020475.3	Pgam2	chr11:5801639-5803733	WT_U	WT_D	OK	0.0801635	0.0112343	-2.83504	1.29578	0.1345	0.332197	no
ENSMUSG00000020476.14	ENSMUSG00000020476.14	Dbnl	chr11:5788487-5800962	WT_U	WT_D	OK	74.4361	67.0018	-0.151803	0.888342	0.2034	0.439824	no
ENSMUSG00000020477.10	ENSMUSG00000020477.10	Mrps24	chr11:5703982-5784710	WT_U	WT_D	OK	63.3183	55.6718	-0.185676	0.779837	0.2632	0.516305	no
ENSMUSG00000020482.4	ENSMUSG00000020482.4	Ccdc117	chr11:5528886-5542187	WT_U	WT_D	OK	18.4664	21.4796	0.218064	-1.26836	0.07045	0.208235	no
ENSMUSG00000020483.14	ENSMUSG00000020483.14	Dynll2	chr11:87979524-87987533	WT_U	WT_D	OK	90.2374	100.581	0.15656	-0.916127	0.19825	0.432467	no
ENSMUSG00000020484.18	ENSMUSG00000020484.18	Xbp1	chr11:5520658-5525893	WT_U	WT_D	OK	60.5083	75.282	0.315172	-1.76133	0.01275	0.055312	no
ENSMUSG00000020485.14	ENSMUSG00000020485.14	Supt4a	chr11:87737551-87743623	WT_U	WT_D	OK	33.5425	34.2834	0.03152	-0.156705	0.82585	0.942062	no
ENSMUSG00000020486.18	ENSMUSG00000020486.18	Sept4	chr11:87566652-87590539	WT_U	WT_D	OK	0.182048	0.213505	0.229951	-0.27128	0.61815	0.840568	no
ENSMUSG00000020491.15	ENSMUSG00000020491.15	2810021J22Rik	chr11:58867215-58883288	WT_U	WT_D	OK	2.87697	2.94715	0.0347703	-0.167944	0.81085	0.936542	no
[truncated: 14,558 more rows]

## Sheet: Undiff_FPKMover1
test_id	gene_id	gene	locus	sample_2	sample_1	status	value_2	value_1	log2(fold_change)	test_stat	p_value	q_value	significant
ENSMUSG00000000001.4	ENSMUSG00000000001.4	Gnai3	chr3:108107279-108146146	WT_U	WT_D	OK	52.5405	50.2617	-0.0639705	0.374672	0.5928	0.824641	no
ENSMUSG00000000028.14	ENSMUSG00000000028.14	Cdc45	chr16:18780446-18835261	WT_U	WT_D	OK	32.7228	32.6077	-0.00508352	0.0212913	0.97515	0.989009	no
ENSMUSG00000000037.16	ENSMUSG00000000037.16	Scml2	chrX:161117192-161258213	WT_U	WT_D	OK	6.68094	5.69158	-0.231222	0.630529	0.34185	0.608378	no
ENSMUSG00000000056.7	ENSMUSG00000000056.7	Narf	chr11:121237252-121255856	WT_U	WT_D	OK	6.06142	3.54251	-0.774884	3.78495	5e-05	0.00046241	yes
ENSMUSG00000000078.6	ENSMUSG00000000078.6	Klf6	chr13:5861488-5870393	WT_U	WT_D	OK	21.832	21.6658	-0.0110248	0.0643838	0.9281	0.974465	no
ENSMUSG00000000088.6	ENSMUSG00000000088.6	Cox5a	chr9:57521231-57543187	WT_U	WT_D	OK	242.907	220.027	-0.142723	0.765662	0.27545	0.53099	no
ENSMUSG00000000093.6	ENSMUSG00000000093.6	Tbx2	chr11:85832550-85841948	WT_U	WT_D	OK	11.7553	8.92727	-0.39702	2.0182	0.00365	0.0197639	yes
ENSMUSG00000000094.12	ENSMUSG00000000094.12	Tbx4	chr11:85886421-85916097	WT_U	WT_D	OK	1.10842	1.00538	-0.140764	0.604759	0.3873	0.65633	no
ENSMUSG00000000120.6	ENSMUSG00000000120.6	Ngfr	chr11:95568817-95587735	WT_U	WT_D	OK	93.5808	74.3631	-0.331626	1.93892	0.00645	0.0317759	yes
ENSMUSG00000000125.5	ENSMUSG00000000125.5	Wnt3	chr11:103774149-103817957	WT_U	WT_D	OK	2.20987	3.02174	0.451418	-2.13722	0.0023	0.0133873	yes
ENSMUSG00000000127.14	ENSMUSG00000000127.14	Fer	chr17:63896017-64139494	WT_U	WT_D	OK	17.575	16.8157	-0.0637159	0.326405	0.6376	0.852268	no
ENSMUSG00000000131.15	ENSMUSG00000000131.15	Xpo6	chr7:126101714-126200501	WT_U	WT_D	OK	28.3736	26.5241	-0.0972454	0.400102	0.49625	0.75392	no
ENSMUSG00000000134.17	ENSMUSG00000000134.17	Tfe3	chrX:7762559-7775202	WT_U	WT_D	OK	18.6426	23.5048	0.334352	-0.873069	0.18705	0.415803	no
ENSMUSG00000000142.15	ENSMUSG00000000142.15	Axin2	chr11:108920348-108950783	WT_U	WT_D	OK	3.73627	4.2741	0.194022	-0.690852	0.30195	0.562999	no
ENSMUSG00000000148.17	ENSMUSG00000000148.17	Brat1	chr5:140705010-140719379	WT_U	WT_D	OK	12.7678	13.3139	0.0604233	-0.302434	0.6706	0.871914	no
ENSMUSG00000000149.10	ENSMUSG00000000149.10	Gna12	chr5:140724126-140830431	WT_U	WT_D	OK	24.582	28.7564	0.226281	-1.28119	0.06415	0.194308	no
ENSMUSG00000000167.14	ENSMUSG00000000167.14	Pih1d2	chr9:50603900-50625000	WT_U	WT_D	OK	2.94959	2.53867	-0.216442	0.214185	0.72825	0.902717	no
ENSMUSG00000000168.9	ENSMUSG00000000168.9	Dlat	chr9:50634632-50659780	WT_U	WT_D	OK	46.6665	46.5089	-0.00488045	0.0189943	0.97585	0.989148	no
ENSMUSG00000000171.4	ENSMUSG00000000171.4	Sdhd	chr9:50596337-50603849	WT_U	WT_D	OK	94.7292	74.8404	-0.339992	1.98507	0.0043	0.0226542	yes
ENSMUSG00000000194.13	ENSMUSG00000000194.13	Gpr107	chr2:31152315-31218775	WT_U	WT_D	OK	20.3688	18.2492	-0.158528	0.57056	0.3371	0.603149	no
ENSMUSG00000000214.10	ENSMUSG00000000214.10	Th	chr7:142892751-142931128	WT_U	WT_D	OK	1.84539	1.45912	-0.338827	1.4102	0.04235	0.142148	no
ENSMUSG00000000247.11	ENSMUSG00000000247.11	Lhx2	chr2:38339280-38369733	WT_U	WT_D	OK	1.84557	2.04704	0.149473	-0.60208	0.37165	0.640303	no
ENSMUSG00000000253.12	ENSMUSG00000000253.12	Gmpr	chr13:45507443-45546382	WT_U	WT_D	OK	8.63107	6.25952	-0.463487	2.17349	0.0013	0.00823191	yes
ENSMUSG00000000266.11	ENSMUSG00000000266.11	Mid2	chrX:140664598-140767715	WT_U	WT_D	OK	4.89337	4.57687	-0.0964671	0.384264	0.5426	0.790155	no
ENSMUSG00000000275.16	ENSMUSG00000000275.16	Trim25	chr11:88999375-89020293	WT_U	WT_D	OK	16.1279	15.2479	-0.080948	0.381412	0.57555	0.813658	no
ENSMUSG00000000276.11	ENSMUSG00000000276.11	Dgke	chr11:89035178-89069098	WT_U	WT_D	OK	4.13174	3.81441	-0.11529	0.556	0.42865	0.695907	no
ENSMUSG00000000278.10	ENSMUSG00000000278.10	Scpep1	chr11:88905927-88955465	WT_U	WT_D	OK	58.3994	78.6192	0.428928	-2.5072	0.00035	0.00265006	yes
ENSMUSG00000000282.12	ENSMUSG00000000282.12	Mnt	chr11:74830919-74845725	WT_U	WT_D	OK	16.6366	19.6668	0.241402	-0.832144	0.2288	0.473317	no
ENSMUSG00000000295.12	ENSMUSG00000000295.12	Hddc2	chr10:31313381-31328204	WT_U	WT_D	OK	35.4605	31.0694	-0.190718	0.947883	0.17415	0.396243	no
ENSMUSG00000000296.7	ENSMUSG00000000296.7	Tpd52l1	chr10:31332379-31445921	WT_U	WT_D	OK	1.12156	1.15064	0.0369297	-0.133623	0.8504	0.950491	no
ENSMUSG00000000301.16	ENSMUSG00000000301.16	Pemt	chr11:59970613-60046489	WT_U	WT_D	OK	11.1347	12.9855	0.221839	-0.862991	0.20985	0.448687	no
ENSMUSG00000000308.14	ENSMUSG00000000308.14	Ckmt1	chr2:121357713-121387168	WT_U	WT_D	OK	6.75931	4.48516	-0.591717	2.75745	5e-05	0.00046241	yes
ENSMUSG00000000325.15	ENSMUSG00000000325.15	Arvcf	chr16:18348181-18479073	WT_U	WT_D	OK	22.3611	30.8188	0.46282	-1.45251	0.0186	0.0748204	no
ENSMUSG00000000326.12	ENSMUSG00000000326.12	Comt	chr16:18348181-18479073	WT_U	WT_D	OK	34.1703	33.8543	-0.0134038	0.0392596	0.9561	0.982921	no
ENSMUSG00000000339.14	ENSMUSG00000000339.14	Rtca	chr3:116488962-116508208	WT_U	WT_D	OK	34.0477	32.2497	-0.0782716	0.365954	0.5977	0.827906	no
ENSMUSG00000000340.10	ENSMUSG00000000340.10	Dbt	chr3:116513069-116549981	WT_U	WT_D	OK	13.1391	10.4155	-0.335134	1.25502	0.04025	0.136596	no
ENSMUSG00000000346.8	ENSMUSG00000000346.8	Dazap2	chr15:100615627-100620731	WT_U	WT_D	OK	77.0826	77.097	0.000269488	-0.00158459	0.9983	0.999128	no
ENSMUSG00000000355.13	ENSMUSG00000000355.13	Mcts1	chrX:38600577-38613426	WT_U	WT_D	OK	24.6247	25.6796	0.0605166	-0.291255	0.67425	0.873635	no
ENSMUSG00000000374.7	ENSMUSG00000000374.7	Trappc10	chr10:78186724-78244642	WT_U	WT_D	OK	17.2205	16.8973	-0.0273343	0.159537	0.81575	0.938501	no
ENSMUSG00000000378.15	ENSMUSG00000000378.15	Ccm2	chr11:6546886-6596744	WT_U	WT_D	OK	15.4433	16.4591	0.0919044	-0.41399	0.5334	0.783258	no
ENSMUSG00000000384.15	ENSMUSG00000000384.15	Tbrg4	chr11:6615597-6626067	WT_U	WT_D	OK	59.156	54.5121	-0.117948	0.498204	0.47245	0.733772	no
ENSMUSG00000000399.10	ENSMUSG00000000399.10	Ndufa9	chr6:126821720-126849136	WT_U	WT_D	OK	84.9252	83.7675	-0.0198021	0.115287	0.86695	0.955768	no
ENSMUSG00000000409.14	ENSMUSG00000000409.14	Lck	chr4:129548343-129573641	WT_U	WT_D	OK	19.7073	34.2224	0.796211	-2.9677	5e-05	0.00046241	yes
ENSMUSG00000000420.15	ENSMUSG00000000420.15	Galnt1	chr18:24205343-24286818	WT_U	WT_D	OK	45.0935	35.4486	-0.347191	1.54679	0.02525	0.0951564	no
ENSMUSG00000000439.9	ENSMUSG00000000439.9	Mkrn2	chr6:115601901-115677780	WT_U	WT_D	OK	19.2677	19.6263	0.0266039	-0.0298442	0.96445	0.98581	no
ENSMUSG00000000440.12	ENSMUSG00000000440.12	Pparg	chr6:115360950-115490399	WT_U	WT_D	OK	5.86211	10.5055	0.841653	-2.49863	5e-05	0.00046241	yes
ENSMUSG00000000441.17	ENSMUSG00000000441.17	Raf1	chr6:115601901-115677780	WT_U	WT_D	OK	50.0115	50.6277	0.0176671	-0.0739293	0.9121	0.969262	no
ENSMUSG00000000486.13	ENSMUSG00000000486.13	Sept1	chr7:127214446-127238179	WT_U	WT_D	OK	2.76399	2.3231	-0.250701	0.184203	0.78655	0.927594	no
ENSMUSG00000000531.4	ENSMUSG00000000531.4	Grasp	chr15:101224206-101232755	WT_U	WT_D	OK	9.33606	7.04576	-0.406058	2.00755	0.0052	0.0265674	yes
ENSMUSG00000000532.10	ENSMUSG00000000532.10	Acvr1b	chr15:101174066-101213679	WT_U	WT_D	OK	11.4577	10.9956	-0.0593911	0.304076	0.66085	0.866481	no
ENSMUSG00000000538.18	ENSMUSG00000000538.18	Tom1l2	chr11:60226713-60352905	WT_U	WT_D	OK	14.1131	16.0539	0.185889	-0.905514	0.1688	0.387831	no
ENSMUSG00000000552.9	ENSMUSG00000000552.9	Zfp385a	chr15:103313894-103340086	WT_U	WT_D	OK	12.2857	10.7051	-0.198682	1.00104	0.14985	0.358138	no
ENSMUSG00000000555.6	ENSMUSG00000000555.6	Itga5	chr15:103344288-103366763	WT_U	WT_D	OK	2.54409	1.67039	-0.606965	2.90403	5e-05	0.00046241	yes
ENSMUSG00000000561.14	ENSMUSG00000000561.14	Wdr77	chr3:105942697-105987423	WT_U	WT_D	OK	55.3785	58.4971	0.0790391	-0.187334	0.77705	0.92369	no
ENSMUSG00000000563.17	ENSMUSG00000000563.17	Atp5f1	chr3:105942697-105987423	WT_U	WT_D	OK	251.712	218.792	-0.202214	0.939293	0.17	0.389766	no
ENSMUSG00000000567.5	ENSMUSG00000000567.5	Sox9	chr11:112782223-112787760	WT_U	WT_D	OK	15.9287	10.0684	-0.661794	3.59119	5e-05	0.00046241	yes
ENSMUSG00000000568.15	ENSMUSG00000000568.15	Hnrnpd	chr5:99955934-99978938	WT_U	WT_D	OK	361.811	333.184	-0.118917	0.519853	0.4575	0.721673	no
ENSMUSG00000000579.14	ENSMUSG00000000579.14	Dynlt1c	chr17:6601670-6609774	WT_U	WT_D	OK	2.31034	2.59583	0.168091	-0.440707	0.52265	0.775048	no
ENSMUSG00000000581.8	ENSMUSG00000000581.8	C1d	chr11:17257578-17269176	WT_U	WT_D	OK	41.9967	39.2684	-0.0969072	0.227372	0.74125	0.908351	no
ENSMUSG00000000594.7	ENSMUSG00000000594.7	Gm2a	chr11:55098114-55113029	WT_U	WT_D	OK	3.82079	2.99964	-0.349082	1.71898	0.01335	0.0574153	no
ENSMUSG00000000600.15	ENSMUSG00000000600.15	Krit1	chr5:3803183-3866596	WT_U	WT_D	OK	29.4936	33.01	0.162501	-0.848768	0.2027	0.438973	no
ENSMUSG00000000605.8	ENSMUSG00000000605.8	Clcn4	chr7:7282315-7299511	WT_U	WT_D	OK	14.2248	17.1591	0.270566	-1.57544	0.02355	0.0901261	no
ENSMUSG00000000628.10	ENSMUSG00000000628.10	Hk2	chr6:82725024-82774454	WT_U	WT_D	OK	38.1006	30.7684	-0.308364	1.70428	0.01165	0.0514489	no
ENSMUSG00000000631.19	ENSMUSG00000000631.19	Myo18a	chr11:77763245-77865980	WT_U	WT_D	OK	19.9878	20.6904	0.0498418	-0.115187	0.8606	0.953869	no
ENSMUSG00000000632.13	ENSMUSG00000000632.13	Sez6	chr11:77930799-77979048	WT_U	WT_D	OK	18.9763	17.6514	-0.104416	0.314196	0.6517	0.860678	no
ENSMUSG00000000686.11	ENSMUSG00000000686.11	Abhd15	chr11:77508098-77607815	WT_U	WT_D	OK	1.04872	1.36795	0.383386	-0.219252	0.7558	0.914449	no
ENSMUSG00000000693.10	ENSMUSG00000000693.10	Loxl3	chr6:83034172-83057808	WT_U	WT_D	OK	1.54895	1.24937	-0.31009	0.150949	0.6587	0.864975	no
ENSMUSG00000000708.14	ENSMUSG00000000708.14	Kat2b	chr17:53566860-53672720	WT_U	WT_D	OK	15.3621	13.9915	-0.134825	0.301111	0.6237	0.843967	no
ENSMUSG00000000711.2	ENSMUSG00000000711.2	Rab5b	chr10:128677192-128696268	WT_U	WT_D	OK	28.4157	30.9989	0.125529	-0.733037	0.2963	0.556128	no
ENSMUSG00000000732.8	ENSMUSG00000000732.8	Icosl	chr10:78069359-78079525	WT_U	WT_D	OK	2.91364	2.58206	-0.1743	0.819454	0.2442	0.492713	no
ENSMUSG00000000751.13	ENSMUSG00000000751.13	Rpa1	chr11:75298165-75348324	WT_U	WT_D	OK	59.7733	51.8727	-0.204526	0.906855	0.19305	0.42488	no
ENSMUSG00000000753.15	ENSMUSG00000000753.15	Serpinf1	chr11:75409768-75422701	WT_U	WT_D	OK	14.5589	19.7719	0.44155	-1.82576	0.0085	0.0398455	yes
ENSMUSG00000000759.14	ENSMUSG00000000759.14	Tubgcp3	chr8:12614276-12679229	WT_U	WT_D	OK	62.5462	53.9844	-0.21238	0.537815	0.4095	0.678067	no
ENSMUSG00000000776.12	ENSMUSG00000000776.12	Polr3d	chr14:70438747-70443471	WT_U	WT_D	OK	23.2974	22.8279	-0.0293708	0.150757	0.83255	0.944308	no
ENSMUSG00000000782.15	ENSMUSG00000000782.15	Tcf7	chr11:51949881-52286179	WT_U	WT_D	OK	3.66087	4.59118	0.326678	-0.183763	0.82245	0.940658	no
ENSMUSG00000000787.12	ENSMUSG00000000787.12	Ddx3x	chrX:13280969-13294052	WT_U	WT_D	OK	244.299	227.698	-0.101526	0.358676	0.60865	0.835084	no
ENSMUSG00000000794.9	ENSMUSG00000000794.9	Kcnn3	chr3:89520163-89675132	WT_U	WT_D	OK	3.95755	1.88747	-1.06815	4.50227	5e-05	0.00046241	yes
ENSMUSG00000000804.14	ENSMUSG00000000804.14	Usp32	chr11:84984441-85140161	WT_U	WT_D	OK	20.4167	20.3453	-0.00505415	0.00944072	0.9894	0.994801	no
ENSMUSG00000000811.13	ENSMUSG00000000811.13	Txnrd3	chr6:89643987-89675529	WT_U	WT_D	OK	11.4524	11.2928	-0.0202467	0.102704	0.87845	0.95941	no
ENSMUSG00000000823.16	ENSMUSG00000000823.16	Znf512b	chr2:181569148-181655660	WT_U	WT_D	OK	22.466	25.0124	0.1549	-0.292027	0.6382	0.852581	no
ENSMUSG00000000826.16	ENSMUSG00000000826.16	Dnajc5	chr2:181520484-181555133	WT_U	WT_D	OK	30.5532	27.6955	-0.141672	0.65157	0.33755	0.603631	no
ENSMUSG00000000827.18	ENSMUSG00000000827.18	Tpd52l2	chr2:181497141-181517966	WT_U	WT_D	OK	84.1261	84.2195	0.00160085	-0.00775474	0.99075	0.995429	no
ENSMUSG00000000838.17	ENSMUSG00000000838.17	Fmr1	chrX:68678484-68717963	WT_U	WT_D	OK	35.8944	32.8267	-0.128889	0.53546	0.4313	0.698015	no
ENSMUSG00000000861.15	ENSMUSG00000000861.15	Bcl11a	chr11:24078055-24174123	WT_U	WT_D	OK	6.39482	7.10688	0.152313	-0.654915	0.33575	0.60184	no
ENSMUSG00000000876.11	ENSMUSG00000000876.11	Pxmp4	chr2:154585757-154603708	WT_U	WT_D	OK	4.12456	3.48692	-0.242287	0.823844	0.2362	0.482961	no
ENSMUSG00000000881.12	ENSMUSG00000000881.12	Dlg3	chrX:100767721-100818410	WT_U	WT_D	OK	1.93704	1.36935	-0.500363	1.15039	0.08445	0.238123	no
ENSMUSG00000000884.16	ENSMUSG00000000884.16	Gnb1l	chr16:18498767-18566679	WT_U	WT_D	OK	2.98374	2.9438	-0.0194422	0.0495204	0.93575	0.976864	no
ENSMUSG00000000889.8	ENSMUSG00000000889.8	Dbh	chr2:27165232-27183200	WT_U	WT_D	OK	3.96222	2.40962	-0.717503	3.13757	5e-05	0.00046241	yes
ENSMUSG00000000901.15	ENSMUSG00000000901.15	Mmp11	chr10:75923221-75932502	WT_U	WT_D	OK	10.6846	18.4633	0.789128	-3.49534	5e-05	0.00046241	yes
ENSMUSG00000000902.13	ENSMUSG00000000902.13	Smarcb1	chr10:75896768-75921617	WT_U	WT_D	OK	84.0354	102.055	0.280278	-1.56931	0.0257	0.0965074	no
ENSMUSG00000000915.15	ENSMUSG00000000915.15	Hip1r	chr5:123973627-124032270	WT_U	WT_D	OK	6.92512	6.1006	-0.182888	0.352374	0.6115	0.836771	no
ENSMUSG00000000916.15	ENSMUSG00000000916.15	Nsun5	chr5:135369952-135394546	WT_U	WT_D	OK	14.721	14.6448	-0.00748719	0.0125886	0.98365	0.992156	no
ENSMUSG00000000934.8	ENSMUSG00000000934.8	Top1mt	chr15:75657034-75678800	WT_U	WT_D	OK	14.7006	15.2167	0.0497805	-0.251318	0.7191	0.898281	no
ENSMUSG00000000948.16	ENSMUSG00000000948.16	Gm38393	chr7:59937370-60140219	WT_U	WT_D	OK	6.66718	6.36336	-0.0672879	0.0692179	0.88935	0.962429	no
ENSMUSG00000000958.9	ENSMUSG00000000958.9	Slc7a7	chr14:54360840-54417780	WT_U	WT_D	OK	1.42424	1.62346	0.18888	-0.148849	0.75935	0.915902	no
ENSMUSG00000000959.6	ENSMUSG00000000959.6	Oxa1l	chr14:54360840-54417780	WT_U	WT_D	OK	22.2946	23.5551	0.0793451	-0.357321	0.60915	0.835393	no
ENSMUSG00000000976.13	ENSMUSG00000000976.13	Heatr6	chr11:83753695-83783754	WT_U	WT_D	OK	8.35619	9.03008	0.111893	-0.429607	0.4574	0.721606	no
ENSMUSG00000001016.12	ENSMUSG00000001016.12	Ilf2	chr3:90476125-90491033	WT_U	WT_D	OK	107.756	102.418	-0.0732989	0.400944	0.5682	0.809067	no
ENSMUSG00000001017.15	ENSMUSG00000001017.15	Chtop	chr3:90498955-90509498	WT_U	WT_D	OK	63.8581	66.7893	0.0647474	-0.362491	0.61285	0.837715	no
ENSMUSG00000001018.15	ENSMUSG00000001018.15	Snapin	chr3:90476125-90491033	WT_U	WT_D	OK	11.3931	12.9766	0.187752	-0.284017	0.6986	0.887601	no
ENSMUSG00000001020.8	ENSMUSG00000001020.8	S100a4	chr3:90560555-90606045	WT_U	WT_D	OK	15.5086	4.6188	-1.74748	6.70341	5e-05	0.00046241	yes
ENSMUSG00000001025.8	ENSMUSG00000001025.8	S100a6	chr3:90612881-90624181	WT_U	WT_D	OK	92.7309	46.9917	-0.980644	4.92132	5e-05	0.00046241	yes
ENSMUSG00000001029.15	ENSMUSG00000001029.15	Icam2	chr11:106377655-106388075	WT_U	WT_D	OK	17.5114	13.2851	-0.398485	1.90271	0.00595	0.0296952	yes
ENSMUSG00000001034.17	ENSMUSG00000001034.17	Mapk7	chr11:61485430-61494406	WT_U	WT_D	OK	20.8117	20.9645	0.0105536	-0.0365227	0.9573	0.983347	no
ENSMUSG00000001036.17	ENSMUSG00000001036.17	Epn2	chr11:61517248-61579687	WT_U	WT_D	OK	24.2533	24.3054	0.00309582	-0.00823544	0.9896	0.994922	no
ENSMUSG00000001039.12	ENSMUSG00000001039.12	B9d1	chr11:61505143-61512931	WT_U	WT_D	OK	9.57646	11.9065	0.314185	-1.39924	0.045	0.148814	no
ENSMUSG00000001052.15	ENSMUSG00000001052.15	Sec24b	chr3:129982758-130061553	WT_U	WT_D	OK	38.7502	36.6871	-0.0789309	0.254705	0.69405	0.885176	no
ENSMUSG00000001053.15	ENSMUSG00000001053.15	N4bp3	chr11:51643062-51650842	WT_U	WT_D	OK	9.07893	6.83426	-0.409737	1.94592	0.00435	0.0228744	yes
ENSMUSG00000001054.9	ENSMUSG00000001054.9	Rmnd5b	chr11:51619734-51635896	WT_U	WT_D	OK	9.03151	9.76215	0.112232	-0.172356	0.7767	0.923565	no
ENSMUSG00000001056.3	ENSMUSG00000001056.3	Nhp2	chr11:51619734-51635896	WT_U	WT_D	OK	201.089	185.075	-0.119724	0.666401	0.34105	0.607429	no
ENSMUSG00000001082.12	ENSMUSG00000001082.12	Mfsd10	chr5:34633641-34637212	WT_U	WT_D	OK	30.1267	30.7828	0.0310818	-0.115269	0.85505	0.951908	no
ENSMUSG00000001089.14	ENSMUSG00000001089.14	Luzp1	chr4:136469760-136602723	WT_U	WT_D	OK	33.2609	27.0674	-0.297271	0.897121	0.1271	0.31968	no
ENSMUSG00000001098.15	ENSMUSG00000001098.15	Kctd10	chr5:114289165-114380508	WT_U	WT_D	OK	28.7394	27.9744	-0.0389228	0.189375	0.78295	0.926139	no
ENSMUSG00000001100.10	ENSMUSG00000001100.10	Poldip2	chr11:78512192-78522736	WT_U	WT_D	OK	34.7217	38.8179	0.160884	-0.829177	0.2169	0.458226	no
ENSMUSG00000001105.15	ENSMUSG00000001105.15	Ift20	chr11:78536360-78541737	WT_U	WT_D	OK	36.8303	35.9464	-0.0350459	0.161032	0.81585	0.938573	no
ENSMUSG00000001119.7	ENSMUSG00000001119.7	Col6a1	chr10:76708791-76726168	WT_U	WT_D	OK	1.57292	0.916479	-0.779272	3.50871	5e-05	0.00046241	yes
ENSMUSG00000001120.15	ENSMUSG00000001120.15	Pcbp3	chr10:76761856-76961887	WT_U	WT_D	OK	533.008	461.717	-0.207148	0.990231	0.15715	0.369903	no
ENSMUSG00000001123.15	ENSMUSG00000001123.15	Lgals9	chr11:78962973-78984946	WT_U	WT_D	OK	4.31839	3.09666	-0.479781	2.17367	0.0016	0.00983992	yes
ENSMUSG00000001127.12	ENSMUSG00000001127.12	Araf	chrX:20797813-20921004	WT_U	WT_D	OK	28.2707	33.6929	0.253137	-0.86797	0.1957	0.4288	no
ENSMUSG00000001128.7	ENSMUSG00000001128.7	Cfp	chrX:20925453-20931555	WT_U	WT_D	OK	1.47719	1.37295	-0.105576	0.254988	0.71165	0.894484	no
ENSMUSG00000001134.9	ENSMUSG00000001134.9	Uxt	chrX:20933394-20986737	WT_U	WT_D	OK	22.5022	24.2407	0.107365	-0.243747	0.73405	0.905308	no
ENSMUSG00000001138.13	ENSMUSG00000001138.13	Cnnm3	chr1:36511866-36528237	WT_U	WT_D	OK	7.1154	7.56102	0.087636	-0.253165	0.7057	0.891613	no
ENSMUSG00000001143.13	ENSMUSG00000001143.13	Lman2l	chr1:36372290-36445271	WT_U	WT_D	OK	22.7051	28.4246	0.324124	-1.36212	0.04975	0.160647	no
ENSMUSG00000001150.6	ENSMUSG00000001150.6	Mcm3ap	chr10:76449080-76515856	WT_U	WT_D	OK	13.5083	13.0088	-0.0543582	0.305577	0.66175	0.867116	no
ENSMUSG00000001151.9	ENSMUSG00000001151.9	Pcnt	chr10:76351253-76442912	WT_U	WT_D	OK	13.4078	12.43	-0.109246	0.63863	0.3646	0.632639	no
ENSMUSG00000001156.9	ENSMUSG00000001156.9	Mxd1	chr6:86647041-86669161	WT_U	WT_D	OK	1.78123	1.78159	0.00029155	-0.00102162	0.99855	0.999158	no
ENSMUSG00000001157.13	ENSMUSG00000001157.13	Gmcl1	chr6:86691767-86733383	WT_U	WT_D	OK	14.2824	14.1928	-0.00907919	0.0431289	0.94825	0.980768	no
ENSMUSG00000001158.13	ENSMUSG00000001158.13	Snrnp27	chr6:86675150-86684522	WT_U	WT_D	OK	76.5547	73.3518	-0.0616586	0.314673	0.64765	0.858328	no
ENSMUSG00000001166.17	ENSMUSG00000001166.17	Oas1c	chr5:120777795-120812514	WT_U	WT_D	OK	1.7034	1.38444	-0.299115	1.10472	0.0797	0.228178	no
ENSMUSG00000001173.15	ENSMUSG00000001173.15	Ocrl	chrX:47912386-47965868	WT_U	WT_D	OK	5.71127	5.72734	0.00405366	-0.0189602	0.9774	0.989848	no
ENSMUSG00000001175.13	ENSMUSG00000001175.13	Calm1	chr12:100199434-100209814	WT_U	WT_D	OK	270.68	268.636	-0.0109356	0.0357471	0.95985	0.984241	no
ENSMUSG00000001211.14	ENSMUSG00000001211.14	Agpat3	chr10:78269177-78352489	WT_U	WT_D	OK	76.3921	95.8071	0.326709	-1.39248	0.04435	0.147204	no
ENSMUSG00000001227.11	ENSMUSG00000001227.11	Sema6b	chr17:56123084-56140343	WT_U	WT_D	OK	1.33772	0.823959	-0.699132	3.08682	5e-05	0.00046241	yes
ENSMUSG00000001228.14	ENSMUSG00000001228.14	Uhrf1	chr17:56303320-56323486	WT_U	WT_D	OK	102.09	87.007	-0.230638	0.802809	0.2336	0.479612	no
ENSMUSG00000001229.7	ENSMUSG00000001229.7	Dpp9	chr17:56186681-56218889	WT_U	WT_D	OK	25.5341	26.8118	0.0704429	-0.411046	0.56265	0.805238	no
ENSMUSG00000001240.13	ENSMUSG00000001240.13	Ramp2	chr11:101246027-101259549	WT_U	WT_D	OK	20.7193	10.1455	-1.03014	1.88918	0.01205	0.0528728	no
ENSMUSG00000001248.14	ENSMUSG00000001248.14	Gramd1a	chr7:31130126-31170641	WT_U	WT_D	OK	37.86	42.4283	0.164352	-0.878129	0.18605	0.414334	no
ENSMUSG00000001249.14	ENSMUSG00000001249.14	Hpn	chr7:31098724-31115290	WT_U	WT_D	OK	1.22863	1.43421	0.223206	-0.58404	0.3946	0.663672	no
ENSMUSG00000001270.8	ENSMUSG00000001270.8	Ckb	chr12:111669354-111672338	WT_U	WT_D	OK	11.7257	10.193	-0.202095	0.997562	0.15285	0.363013	no
ENSMUSG00000001280.12	ENSMUSG00000001280.12	Sp1	chr15:102406142-102436404	WT_U	WT_D	OK	29.6087	28.2527	-0.0676324	0.271433	0.5943	0.82573	no
ENSMUSG00000001285.12	ENSMUSG00000001285.12	Myg1	chr15:102326115-102338139	WT_U	WT_D	OK	67.4688	66.7733	-0.0149492	0.0436876	0.9514	0.981594	no
ENSMUSG00000001288.14	ENSMUSG00000001288.14	Rarg	chr15:102234937-102257517	WT_U	WT_D	OK	5.51297	4.58834	-0.264857	1.01076	0.13465	0.332477	no
ENSMUSG00000001289.12	ENSMUSG00000001289.12	Pfdn5	chr15:102326115-102338139	WT_U	WT_D	OK	232.264	218.073	-0.0909544	0.349045	0.61405	0.838394	no
ENSMUSG00000001305.5	ENSMUSG00000001305.5	Rrp15	chr1:186720977-186749358	WT_U	WT_D	OK	102.181	104.989	0.0391112	-0.227281	0.74325	0.908979	no
ENSMUSG00000001313.12	ENSMUSG00000001313.12	Rnd2	chr11:101458744-101471853	WT_U	WT_D	OK	26.4717	32.5176	0.29677	-0.551163	0.4219	0.689709	no
ENSMUSG00000001323.17	ENSMUSG00000001323.17	Srr	chr11:74898070-75164448	WT_U	WT_D	OK	4.78878	5.63526	0.234824	-0.19685	0.7463	0.910309	no
ENSMUSG00000001333.9	ENSMUSG00000001333.9	Sync	chr4:129287616-129335370	WT_U	WT_D	OK	2.99133	2.99771	0.00307375	-0.00228054	0.99725	0.998566	no
ENSMUSG00000001334.9	ENSMUSG00000001334.9	Fndc5	chr4:129136998-129144593	WT_U	WT_D	OK	4.64354	2.39092	-0.957659	4.57327	5e-05	0.00046241	yes
ENSMUSG00000001366.14	ENSMUSG00000001366.14	Fbxo9	chr9:78081498-78109065	WT_U	WT_D	OK	13.06	12.5528	-0.0571457	0.254851	0.7017	0.889419	no
ENSMUSG00000001376.17	ENSMUSG00000001376.17	Ccdc132	chr6:3498381-3603531	WT_U	WT_D	OK	24.5342	25.4905	0.0551654	-0.288895	0.6563	0.863407	no
ENSMUSG00000001380.6	ENSMUSG00000001380.6	Hars	chr18:36766529-36792562	WT_U	WT_D	OK	69.3792	65.4181	-0.0848133	0.44083	0.5271	0.778444	no
ENSMUSG00000001383.8	ENSMUSG00000001383.8	Zmat2	chr18:36793922-36799660	WT_U	WT_D	OK	55.9839	51.9992	-0.106523	0.623073	0.3718	0.640407	no
ENSMUSG00000001403.13	ENSMUSG00000001403.13	Ube2c	chr2:164769897-164779967	WT_U	WT_D	OK	193.619	185.204	-0.0641053	0.37494	0.58455	0.819319	no
ENSMUSG00000001415.10	ENSMUSG00000001415.10	Smg5	chr3:88336259-88362338	WT_U	WT_D	OK	51.017	47.6719	-0.0978389	0.391765	0.53805	0.786776	no
ENSMUSG00000001416.13	ENSMUSG00000001416.13	Cct3	chr3:88297115-88321767	WT_U	WT_D	OK	313.302	299.943	-0.0628656	0.362863	0.60395	0.831974	no
ENSMUSG00000001418.13	ENSMUSG00000001418.13	Glmp	chr3:88325022-88336148	WT_U	WT_D	OK	14.9802	16.0642	0.100792	-0.357365	0.60805	0.834741	no
ENSMUSG00000001419.17	ENSMUSG00000001419.17	Mef2d	chr3:88142371-88177785	WT_U	WT_D	OK	51.9719	43.3618	-0.261307	1.0153	0.13225	0.32829	no
ENSMUSG00000001420.13	ENSMUSG00000001420.13	Tmem79	chr3:88325022-88336148	WT_U	WT_D	OK	1.47683	1.29393	-0.190744	0.252705	0.7204	0.898885	no
ENSMUSG00000001424.14	ENSMUSG00000001424.14	Snd1	chr6:28475138-28935162	WT_U	WT_D	OK	326.553	374.321	0.196959	-0.556785	0.4256	0.69319	no
ENSMUSG00000001435.14	ENSMUSG00000001435.14	Col18a1	chr10:77032240-77166548	WT_U	WT_D	OK	6.91773	6.59965	-0.0679092	0.133998	0.8281	0.942986	no
ENSMUSG00000001436.15	ENSMUSG00000001436.15	Slc19a1	chr10:77032240-77166548	WT_U	WT_D	OK	41.8884	38.6399	-0.116459	0.455624	0.5113	0.766281	no
ENSMUSG00000001440.5	ENSMUSG00000001440.5	Kpnb1	chr11:97159713-97187881	WT_U	WT_D	OK	353.967	321.793	-0.137482	0.381735	0.58945	0.82239	no
ENSMUSG00000001441.13	ENSMUSG00000001441.13	Npepps	chr11:97205841-97282897	WT_U	WT_D	OK	46.5239	40.0093	-0.217637	0.969462	0.08375	0.236762	no
ENSMUSG00000001445.10	ENSMUSG00000001445.10	Mrpl10	chr11:97041559-97068904	WT_U	WT_D	OK	63.8243	63.4591	-0.00827875	0.0451299	0.9463	0.980056	no
ENSMUSG00000001467.5	ENSMUSG00000001467.5	Cyp51	chr5:3928053-4104746	WT_U	WT_D	OK	61.444	66.6165	0.116607	-0.486629	0.4417	0.707374	no
ENSMUSG00000001473.6	ENSMUSG00000001473.6	Tubb6	chr18:67390716-67402748	WT_U	WT_D	OK	95.6769	85.7722	-0.157661	0.923113	0.18835	0.417784	no
ENSMUSG00000001507.16	ENSMUSG00000001507.16	Itga3	chr11:95044473-95076801	WT_U	WT_D	OK	2.62183	3.55666	0.439949	-1.15683	0.08745	0.244062	no
ENSMUSG00000001517.14	ENSMUSG00000001517.14	Foxm1	chr6:128362966-128424931	WT_U	WT_D	OK	40.1122	37.3222	-0.104007	0.365136	0.5635	0.805925	no
ENSMUSG00000001518.12	ENSMUSG00000001518.12	Itfg2	chr6:128362966-128424931	WT_U	WT_D	OK	17.5456	20.9769	0.257692	-0.421006	0.4252	0.69282	no
ENSMUSG00000001520.12	ENSMUSG00000001520.12	Nrip2	chr6:128362966-128424931	WT_U	WT_D	OK	1.0025	4.01111	2.0004	-1.4046	0.02355	0.0901261	no
ENSMUSG00000001521.12	ENSMUSG00000001521.12	Tulp3	chr6:128321160-128355851	WT_U	WT_D	OK	18.8635	18.6071	-0.0197442	0.109533	0.86765	0.955909	no
ENSMUSG00000001524.14	ENSMUSG00000001524.14	Gtf2h4	chr17:35667729-35673739	WT_U	WT_D	OK	16.6867	16.7514	0.005583	-0.025256	0.97085	0.987908	no
ENSMUSG00000001525.10	ENSMUSG00000001525.10	Tubb5	chr17:35833920-35838306	WT_U	WT_D	OK	662.41	698.71	0.0769693	-0.376912	0.5782	0.815128	no
ENSMUSG00000001552.14	ENSMUSG00000001552.14	Jup	chr11:100368957-100397763	WT_U	WT_D	OK	25.3887	16.809	-0.594953	2.27955	0.00075	0.0051382	yes
ENSMUSG00000001555.10	ENSMUSG00000001555.10	Fkbp10	chr11:100415696-100441808	WT_U	WT_D	OK	3.56799	1.95783	-0.865856	1.39118	0.03265	0.116262	no
ENSMUSG00000001569.10	ENSMUSG00000001569.10	Nom1	chr5:29434663-29457843	WT_U	WT_D	OK	14.2489	14.3013	0.00529575	-0.0112483	0.98725	0.993796	no
ENSMUSG00000001576.14	ENSMUSG00000001576.14	Ergic1	chr17:26554253-26656931	WT_U	WT_D	OK	54.8096	57.7064	0.0743027	-0.363512	0.5872	0.821057	no
ENSMUSG00000001604.14	ENSMUSG00000001604.14	Tcea3	chr4:136247728-136274898	WT_U	WT_D	OK	1.62799	0.881577	-0.884933	2.89133	0.00015	0.00125317	yes
ENSMUSG00000001627.11	ENSMUSG00000001627.11	Ifrd1	chr12:40201566-40248504	WT_U	WT_D	OK	195.961	193.669	-0.0169735	0.0642071	0.92745	0.974249	no
ENSMUSG00000001630.13	ENSMUSG00000001630.13	Stk38l	chr6:146724994-146778812	WT_U	WT_D	OK	6.82614	6.77098	-0.0117053	0.0486172	0.9385	0.977689	no
ENSMUSG00000001632.16	ENSMUSG00000001632.16	Brpf1	chr6:113307136-113326747	WT_U	WT_D	OK	16.3785	15.8325	-0.0489142	0.220379	0.71345	0.895365	no
ENSMUSG00000001642.18	ENSMUSG00000001642.18	Akr1b3	chr6:34290264-34324249	WT_U	WT_D	OK	107.062	80.0163	-0.420081	2.4274	0.0006	0.00423598	yes
ENSMUSG00000001661.5	ENSMUSG00000001661.5	Hoxc6	chr15:102966795-103017429	WT_U	WT_D	OK	12.4652	11.6301	-0.100043	0.188912	0.78845	0.928316	no
ENSMUSG00000001666.8	ENSMUSG00000001666.8	Ddt	chr10:75771229-75781414	WT_U	WT_D	OK	45.628	49.9765	0.13133	-0.658387	0.3403	0.606578	no
ENSMUSG00000001674.11	ENSMUSG00000001674.11	Ddx18	chr1:121553834-121567989	WT_U	WT_D	OK	66.2599	63.4296	-0.0629798	0.257491	0.70325	0.890427	no
ENSMUSG00000001687.15	ENSMUSG00000001687.15	Ubl3	chr5:148504634-148552789	WT_U	WT_D	OK	28.0803	32.2392	0.199258	-0.812314	0.24005	0.487728	no
ENSMUSG00000001700.9	ENSMUSG00000001700.9	Gramd3	chr18:56432131-56503792	WT_U	WT_D	OK	3.85388	3.10002	-0.314034	1.49928	0.0321	0.114784	no
ENSMUSG00000001707.7	ENSMUSG00000001707.7	Eef1e1	chr13:38645697-38659028	WT_U	WT_D	OK	59.0932	56.7392	-0.0586463	0.300338	0.6654	0.869273	no
ENSMUSG00000001729.14	ENSMUSG00000001729.14	Akt1	chr12:112653820-112674884	WT_U	WT_D	OK	56.7996	54.1166	-0.0698096	0.336716	0.6106	0.836214	no
ENSMUSG00000001750.15	ENSMUSG00000001750.15	Tcirg1	chr19:3896049-3907133	WT_U	WT_D	OK	6.98512	4.58489	-0.607398	1.83983	0.01085	0.0486036	yes
ENSMUSG00000001751.9	ENSMUSG00000001751.9	Naglu	chr11:101070011-101077672	WT_U	WT_D	OK	12.8944	12.5542	-0.0385745	0.193891	0.77715	0.923717	no
ENSMUSG00000001755.12	ENSMUSG00000001755.12	Coasy	chr11:101082564-101086619	WT_U	WT_D	OK	31.483	37.7007	0.260018	-1.12476	0.10645	0.281619	no
ENSMUSG00000001763.14	ENSMUSG00000001763.14	Tspan33	chr6:29694221-29718559	WT_U	WT_D	OK	1.88971	2.02109	0.0969687	-0.422176	0.5481	0.79455	no
ENSMUSG00000001767.5	ENSMUSG00000001767.5	Crnkl1	chr2:145917478-146215039	WT_U	WT_D	OK	12.5041	12.4066	-0.0112934	0.0483928	0.93565	0.976831	no
ENSMUSG00000001774.7	ENSMUSG00000001774.7	Chordc1	chr9:18292266-18314000	WT_U	WT_D	OK	53.664	63.6541	0.246299	-1.44099	0.03895	0.133167	no
ENSMUSG00000001783.3	ENSMUSG00000001783.3	Rtcb	chr10:85927680-85957823	WT_U	WT_D	OK	92.5604	96.2852	0.056919	-0.331195	0.63685	0.851742	no
ENSMUSG00000001785.11	ENSMUSG00000001785.11	Pwp1	chr10:85871830-85889096	WT_U	WT_D	OK	42.083	40.1249	-0.0687398	0.37696	0.59425	0.825718	no
ENSMUSG00000001786.14	ENSMUSG00000001786.14	Fbxo7	chr10:86020440-86051873	WT_U	WT_D	OK	8.12284	8.26798	0.0255507	-0.0972132	0.8827	0.960534	no
ENSMUSG00000001794.12	ENSMUSG00000001794.12	Capns1	chr7:30186941-30195164	WT_U	WT_D	OK	106.36	114.598	0.107626	-0.575121	0.4032	0.672123	no
ENSMUSG00000001827.11	ENSMUSG00000001827.11	Folr1	chr7:101858330-101870788	WT_U	WT_D	OK	11.1923	12.7667	0.189879	-0.775254	0.2672	0.521254	no
ENSMUSG00000001829.16	ENSMUSG00000001829.16	Clpb	chr7:101663632-101790168	WT_U	WT_D	OK	44.2003	48.8969	0.145687	-0.602818	0.38245	0.651483	no
ENSMUSG00000001833.16	ENSMUSG00000001833.16	Sept7	chr9:25252438-25308571	WT_U	WT_D	OK	99.599	86.9102	-0.196606	1.15102	0.09865	0.266522	no
ENSMUSG00000001844.10	ENSMUSG00000001844.10	Zdhhc4	chr5:143316488-143332704	WT_U	WT_D	OK	20.6133	22.5823	0.131617	-0.590383	0.39415	0.663205	no
ENSMUSG00000001847.14	ENSMUSG00000001847.14	Rac1	chr5:143464583-143528036	WT_U	WT_D	OK	297.532	242.52	-0.294941	1.20342	0.08235	0.233701	no
ENSMUSG00000001855.15	ENSMUSG00000001855.15	Nup214	chr2:31974435-32084857	WT_U	WT_D	OK	18.7774	18.3871	-0.0303034	0.120608	0.83155	0.944082	no
ENSMUSG00000001864.13	ENSMUSG00000001864.13	Aif1l	chr2:31950138-31973442	WT_U	WT_D	OK	4.13384	4.29172	0.0540734	-0.14922	0.7951	0.930677	no
ENSMUSG00000001891.16	ENSMUSG00000001891.16	Ugp2	chr11:21321137-21374161	WT_U	WT_D	OK	43.8743	41.3236	-0.0864102	0.480412	0.48025	0.740287	no
ENSMUSG00000001909.15	ENSMUSG00000001909.15	Trmt1	chr8:84670482-84699808	WT_U	WT_D	OK	51.8283	57.3113	0.14508	-0.322759	0.62465	0.844421	no
ENSMUSG00000001910.4	ENSMUSG00000001910.4	Nacc1	chr8:84670482-84699808	WT_U	WT_D	OK	33.4797	35.3529	0.078542	-0.377997	0.5891	0.822222	no
ENSMUSG00000001911.16	ENSMUSG00000001911.16	Nfix	chr8:84699875-84800344	WT_U	WT_D	OK	7.06672	4.39035	-0.686705	2.31094	0.0001	0.000870202	yes
ENSMUSG00000001918.17	ENSMUSG00000001918.17	Slc1a5	chr7:16781339-16798274	WT_U	WT_D	OK	88.6832	108.241	0.287514	-1.43351	0.03085	0.1113	no
ENSMUSG00000001924.15	ENSMUSG00000001924.15	Uba1	chrX:20658325-20683179	WT_U	WT_D	OK	127.256	129.274	0.0226985	-0.105148	0.8784	0.95941	no
ENSMUSG00000001930.17	ENSMUSG00000001930.17	Vwf	chr6:125546773-125686679	WT_U	WT_D	OK	2.42639	2.62898	0.115692	-0.417022	0.52485	0.776701	no
ENSMUSG00000001942.7	ENSMUSG00000001942.7	Siae	chr9:37613846-37648318	WT_U	WT_D	OK	1.70219	1.38385	-0.298705	1.36439	0.05225	0.166758	no
ENSMUSG00000001948.9	ENSMUSG00000001948.9	Spa17	chr9:37603294-37613720	WT_U	WT_D	OK	11.0272	10.3635	-0.0895552	0.410164	0.56135	0.804205	no
ENSMUSG00000001962.8	ENSMUSG00000001962.8	Fam50a	chrX:74313032-74320149	WT_U	WT_D	OK	59.5561	62.0709	0.0596678	-0.343287	0.61905	0.841118	no
ENSMUSG00000001964.14	ENSMUSG00000001964.14	Emd	chrX:74254686-74261548	WT_U	WT_D	OK	68.9344	75.4515	0.130325	-0.683082	0.33705	0.603081	no
ENSMUSG00000001983.7	ENSMUSG00000001983.7	Taco1	chr11:106065076-106073612	WT_U	WT_D	OK	22.6002	22.0203	-0.0375014	0.188921	0.7898	0.928803	no
ENSMUSG00000001988.8	ENSMUSG00000001988.8	Npas1	chr7:16455720-16476780	WT_U	WT_D	OK	2.19842	2.2457	0.0306982	-0.137543	0.844	0.948331	no
ENSMUSG00000001995.8	ENSMUSG00000001995.8	Sipa1l2	chr8:125418062-125492710	WT_U	WT_D	OK	23.8349	21.2319	-0.166842	0.976825	0.1653	0.38265	no
ENSMUSG00000001998.15	ENSMUSG00000001998.15	Ap4e1	chr2:127008716-127067909	WT_U	WT_D	OK	9.83831	9.51863	-0.0476566	0.22	0.7424	0.908683	no
ENSMUSG00000001999.15	ENSMUSG00000001999.15	Blvra	chr2:127070664-127097084	WT_U	WT_D	OK	12.4304	9.62378	-0.369197	1.77983	0.0097	0.0443624	yes
ENSMUSG00000002006.12	ENSMUSG00000002006.12	Pdzd4	chrX:73793358-73824969	WT_U	WT_D	OK	9.67194	9.30238	-0.0562054	0.286154	0.68765	0.881322	no
ENSMUSG00000002010.17	ENSMUSG00000002010.17	Idh3g	chrX:73778962-73786897	WT_U	WT_D	OK	101.473	107.426	0.0822473	-0.400612	0.55995	0.803279	no
ENSMUSG00000002014.12	ENSMUSG00000002014.12	Ssr4	chrX:73787027-73790830	WT_U	WT_D	OK	73.1343	77.4246	0.0822438	-0.384834	0.58	0.816493	no
ENSMUSG00000002015.5	ENSMUSG00000002015.5	Bcap31	chrX:73686177-73716175	WT_U	WT_D	OK	59.9914	59.6462	-0.00832547	0.0484102	0.9435	0.97913	no
ENSMUSG00000002017.9	ENSMUSG00000002017.9	Fam98a	chr17:75537085-75551946	WT_U	WT_D	OK	35.3948	34.7843	-0.0251011	0.136401	0.8365	0.945823	no
ENSMUSG00000002028.12	ENSMUSG00000002028.12	Kmt2a	chr9:44803354-44881296	WT_U	WT_D	OK	17.392	16.8396	-0.046566	0.176804	0.7942	0.930363	no
ENSMUSG00000002031.11	ENSMUSG00000002031.11	Ift46	chr9:44767907-44792714	WT_U	WT_D	OK	51.9243	52.4608	0.0148299	-0.0582575	0.9322	0.975689	no
ENSMUSG00000002043.16	ENSMUSG00000002043.16	Trappc6a	chr7:19508669-19516145	WT_U	WT_D	OK	11.1826	17.2171	0.622587	-2.94485	5e-05	0.00046241	yes
ENSMUSG00000002052.6	ENSMUSG00000002052.6	Supt6	chr11:78206745-78255496	WT_U	WT_D	OK	36.6879	35.1429	-0.0620711	0.34885	0.6117	0.836862	no
ENSMUSG00000002055.9	ENSMUSG00000002055.9	Spag5	chr11:78301528-78322457	WT_U	WT_D	OK	26.5775	30.0291	0.176156	-0.610416	0.33365	0.599406	no
ENSMUSG00000002058.13	ENSMUSG00000002058.13	Unc119	chr11:78343481-78349164	WT_U	WT_D	OK	14.2895	12.1461	-0.234462	1.1487	0.1011	0.271211	no
ENSMUSG00000002059.17	ENSMUSG00000002059.17	Rab34	chr11:78188429-78192193	WT_U	WT_D	OK	24.9742	26.4443	0.0825183	-0.391817	0.56095	0.803953	no
ENSMUSG00000002064.10	ENSMUSG00000002064.10	Sdf2	chr11:78206745-78255496	WT_U	WT_D	OK	17.9368	18.8811	0.0740203	-0.114982	0.8599	0.953681	no
ENSMUSG00000002068.16	ENSMUSG00000002068.16	Ccne1	chr7:38097983-38107534	WT_U	WT_D	OK	34.6104	29.6397	-0.223675	0.870927	0.2116	0.451024	no
ENSMUSG00000002083.12	ENSMUSG00000002083.12	Bbc3	chr7:16309615-16318205	WT_U	WT_D	OK	6.7263	8.97609	0.416274	-1.51819	0.02775	0.102545	no
ENSMUSG00000002102.15	ENSMUSG00000002102.15	Psmc3	chr2:91054008-91070417	WT_U	WT_D	OK	136.806	143.754	0.0714706	-0.383249	0.5696	0.810128	no
ENSMUSG00000002103.15	ENSMUSG00000002103.15	Acp2	chr2:91202884-91236982	WT_U	WT_D	OK	4.60163	6.31966	0.457702	-1.45908	0.024	0.091471	no
ENSMUSG00000002105.15	ENSMUSG00000002105.15	Slc39a13	chr2:91054008-91070417	WT_U	WT_D	OK	5.62161	4.94661	-0.184543	0.192281	0.73625	0.906303	no
ENSMUSG00000002108.10	ENSMUSG00000002108.10	Nr1h3	chr2:91184060-91202834	WT_U	WT_D	OK	1.17982	0.95574	-0.303877	1.06914	0.1119	0.292172	no
ENSMUSG00000002109.14	ENSMUSG00000002109.14	Ddb2	chr2:91202884-91236982	WT_U	WT_D	OK	2.34426	2.74886	0.229701	-0.488621	0.4883	0.747463	no
ENSMUSG00000002129.11	ENSMUSG00000002129.11	Sf3a1	chr11:4160349-4182541	WT_U	WT_D	OK	44.0282	43.2291	-0.0264251	0.119338	0.8389	0.946677	no
ENSMUSG00000002147.18	ENSMUSG00000002147.18	Stat6	chr10:127642985-127701049	WT_U	WT_D	OK	14.9697	11.0885	-0.432981	1.26102	0.037	0.128069	no
ENSMUSG00000002205.15	ENSMUSG00000002205.15	Vrk3	chr7:44731480-44777515	WT_U	WT_D	OK	15.6393	15.7551	0.010643	-0.0422926	0.9505	0.981332	no
ENSMUSG00000002210.11	ENSMUSG00000002210.11	Smg9	chr7:24399618-24422778	WT_U	WT_D	OK	23.3351	22.6095	-0.0455726	0.200665	0.76835	0.91998	no
ENSMUSG00000002221.11	ENSMUSG00000002221.11	Paxip1	chr5:27740079-27791691	WT_U	WT_D	OK	27.6717	25.9259	-0.0940172	0.258748	0.70255	0.890001	no
ENSMUSG00000002222.14	ENSMUSG00000002222.14	Rmnd5a	chr6:71388633-71440637	WT_U	WT_D	OK	25.238	30.6185	0.278806	-1.43842	0.0273	0.101226	no
ENSMUSG00000002227.15	ENSMUSG00000002227.15	Mov10	chr3:104794835-104818563	WT_U	WT_D	OK	11.619	12.9227	0.153422	-0.602024	0.3851	0.654118	no
ENSMUSG00000002233.13	ENSMUSG00000002233.13	Rhoc	chr3:104788374-104794459	WT_U	WT_D	OK	85.1547	159.629	0.906565	-4.89825	5e-05	0.00046241	yes
ENSMUSG00000002249.17	ENSMUSG00000002249.17	Tead3	chr17:28331670-28350805	WT_U	WT_D	OK	3.00794	1.11951	-1.42591	3.61256	5e-05	0.00046241	yes
ENSMUSG00000002250.15	ENSMUSG00000002250.15	Ppard	chr17:28232753-28301469	WT_U	WT_D	OK	11.1881	10.451	-0.0983241	0.377075	0.5914	0.823723	no
ENSMUSG00000002257.7	ENSMUSG00000002257.7	Def6	chr17:28207777-28228608	WT_U	WT_D	OK	3.4756	3.18806	-0.124583	0.58521	0.39675	0.665891	no
ENSMUSG00000002265.15	ENSMUSG00000002265.15	Peg3	chr7:6703891-6730421	WT_U	WT_D	OK	51.3225	43.575	-0.236091	1.16143	0.0603	0.185586	no
ENSMUSG00000002274.12	ENSMUSG00000002274.12	Metrn	chr17:25794570-25985680	WT_U	WT_D	OK	24.4544	56.3219	1.2036	-2.06208	0.00575	0.028858	yes
ENSMUSG00000002279.18	ENSMUSG00000002279.18	Lmf1	chr17:25579173-25662826	WT_U	WT_D	OK	21.2967	21.3751	0.00530127	-0.025501	0.9703	0.987639	no
ENSMUSG00000002280.10	ENSMUSG00000002280.10	Narfl	chr17:25773775-25785673	WT_U	WT_D	OK	8.42876	9.10977	0.112094	-0.309188	0.5604	0.803579	no
ENSMUSG00000002297.15	ENSMUSG00000002297.15	Dbf4	chr5:8396972-8422716	WT_U	WT_D	OK	57.1754	58.7388	0.0389192	-0.211186	0.7552	0.914341	no
ENSMUSG00000002307.15	ENSMUSG00000002307.15	Daxx	chr17:33909413-33915589	WT_U	WT_D	OK	14.1946	13.6494	-0.0565047	0.254281	0.6955	0.885887	no
ENSMUSG00000002308.15	ENSMUSG00000002308.15	Cd320	chr17:33843090-33849774	WT_U	WT_D	OK	18.4236	15.9015	-0.212392	0.796167	0.2564	0.507768	no
ENSMUSG00000002319.15	ENSMUSG00000002319.15	Ipo4	chr14:55625399-55643806	WT_U	WT_D	OK	30.2678	30.819	0.0260362	-0.0759489	0.89735	0.964896	no
ENSMUSG00000002320.15	ENSMUSG00000002320.15	Tm9sf1	chr14:55625399-55643806	WT_U	WT_D	OK	30.5715	30.9573	0.0180923	-0.0462612	0.9397	0.978073	no
ENSMUSG00000002324.7	ENSMUSG00000002324.7	Rec8	chr14:55618036-55625395	WT_U	WT_D	OK	4.86691	23.3652	2.26328	-9.1783	5e-05	0.00046241	yes
ENSMUSG00000002325.14	ENSMUSG00000002325.14	Irf9	chr14:55591707-55610030	WT_U	WT_D	OK	4.37087	4.08378	-0.0980153	0.224633	0.73285	0.904753	no
ENSMUSG00000002326.5	ENSMUSG00000002326.5	Gmpr2	chr14:55672234-55678750	WT_U	WT_D	OK	12.8317	12.502	-0.0375534	0.187015	0.78965	0.92874	no
ENSMUSG00000002329.6	ENSMUSG00000002329.6	Mdp1	chr14:55657878-55660508	WT_U	WT_D	OK	20.8026	22.6967	0.125719	-0.639385	0.35765	0.625246	no
ENSMUSG00000002332.15	ENSMUSG00000002332.15	Dhrs1	chr14:55739019-55745690	WT_U	WT_D	OK	16.1097	14.9962	-0.103333	0.502525	0.4577	0.721841	no
ENSMUSG00000002341.8	ENSMUSG00000002341.8	Ncan	chr8:70093084-70120873	WT_U	WT_D	OK	2.76891	2.7663	-0.00136054	0.00681894	0.9922	0.995917	no
ENSMUSG00000002342.17	ENSMUSG00000002342.17	Tmem161a	chr8:70172355-70183681	WT_U	WT_D	OK	23.8539	26.3465	0.143386	-0.46237	0.47305	0.734295	no
ENSMUSG00000002343.11	ENSMUSG00000002343.11	Armc6	chr8:70220171-70279915	WT_U	WT_D	OK	16.3151	17.5677	0.106717	-0.285377	0.66825	0.870759	no
ENSMUSG00000002345.17	ENSMUSG00000002345.17	Borcs8	chr8:70139498-70167488	WT_U	WT_D	OK	11.3015	15.3907	0.445545	-1.38568	0.0522	0.166646	no
ENSMUSG00000002346.16	ENSMUSG00000002346.16	Slc25a42	chr8:70184339-70212305	WT_U	WT_D	OK	1.05002	1.07855	0.0386763	-0.151162	0.8329	0.944438	no
ENSMUSG00000002365.9	ENSMUSG00000002365.9	Snx9	chr17:5841327-5931033	WT_U	WT_D	OK	16.932	20.3506	0.265319	-1.35517	0.0535	0.169704	no
ENSMUSG00000002372.8	ENSMUSG00000002372.8	Ranbp3	chr17:56673224-56711769	WT_U	WT_D	OK	29.8417	28.8531	-0.0486034	0.282898	0.6872	0.881027	no
ENSMUSG00000002379.6	ENSMUSG00000002379.6	Ndufa11	chr17:56717761-56724248	WT_U	WT_D	OK	11.8693	11.4028	-0.0578467	0.293124	0.68185	0.877965	no
ENSMUSG00000002393.14	ENSMUSG00000002393.14	Nr2f6	chr8:71371297-71381960	WT_U	WT_D	OK	18.3727	15.6005	-0.235971	0.699243	0.29325	0.552536	no
ENSMUSG00000002395.14	ENSMUSG00000002395.14	Use1	chr8:71366847-71369732	WT_U	WT_D	OK	49.8077	63.1359	0.342092	-1.70649	0.0149	0.0627113	no
ENSMUSG00000002396.8	ENSMUSG00000002396.8	Ocel1	chr8:71371297-71381960	WT_U	WT_D	OK	1.30988	1.45109	0.147702	-0.146759	0.7826	0.926036	no
ENSMUSG00000002409.17	ENSMUSG00000002409.17	Dyrk1b	chr7:28179468-28187294	WT_U	WT_D	OK	2.57112	3.85607	0.584734	-2.7194	0.0001	0.000870202	yes
ENSMUSG00000002413.15	ENSMUSG00000002413.15	Braf	chr6:39573872-39725463	WT_U	WT_D	OK	15.8932	14.6815	-0.11441	0.443579	0.5255	0.777193	no
ENSMUSG00000002416.13	ENSMUSG00000002416.13	Ndufb2	chr6:39573872-39725463	WT_U	WT_D	OK	72.0705	70.253	-0.036849	0.0777415	0.91465	0.969966	no
ENSMUSG00000002428.12	ENSMUSG00000002428.12	Hltf	chr3:20057810-20118490	WT_U	WT_D	OK	12.1949	11.2495	-0.116417	0.590629	0.4001	0.669171	no
ENSMUSG00000002455.14	ENSMUSG00000002455.14	Prpf6	chr2:181569148-181655660	WT_U	WT_D	OK	34.9713	33.8864	-0.045465	0.180174	0.79185	0.929664	no
ENSMUSG00000002458.13	ENSMUSG00000002458.13	Rgs19	chr2:181688418-181693977	WT_U	WT_D	OK	33.7837	31.7408	-0.0899889	0.328353	0.6348	0.850557	no
ENSMUSG00000002459.17	ENSMUSG00000002459.17	Rgs20	chr1:4909575-5162529	WT_U	WT_D	OK	1.92392	2.0505	0.0919269	-0.0896938	0.8923	0.963364	no
ENSMUSG00000002477.4	ENSMUSG00000002477.4	Snrpd1	chr18:10617795-10628230	WT_U	WT_D	OK	215.145	183.3	-0.231103	1.35154	0.0534	0.169483	no
ENSMUSG00000002486.15	ENSMUSG00000002486.15	Tchp	chr5:114707759-114722327	WT_U	WT_D	OK	9.95482	11.3873	0.193959	-0.654066	0.33395	0.59974	no
ENSMUSG00000002489.15	ENSMUSG00000002489.15	Tiam1	chr16:89787110-89980080	WT_U	WT_D	OK	12.8091	12.2175	-0.06822	0.194016	0.6613	0.86681	no
ENSMUSG00000002496.9	ENSMUSG00000002496.9	Tsc2	chr17:24549949-24632629	WT_U	WT_D	OK	10.7372	11.3966	0.0859857	-0.376086	0.5912	0.823559	no
ENSMUSG00000002504.14	ENSMUSG00000002504.14	Slc9a3r2	chr17:24639281-24650305	WT_U	WT_D	OK	2.73133	3.279	0.263652	-1.21985	0.0834	0.235939	no
ENSMUSG00000002524.15	ENSMUSG00000002524.15	Puf60	chr15:76070183-76080946	WT_U	WT_D	OK	101.949	96.1684	-0.0842128	0.493128	0.48325	0.7429	no
ENSMUSG00000002546.16	ENSMUSG00000002546.16	Golga2	chr2:32278815-32307921	WT_U	WT_D	OK	24.5973	25.3825	0.0453342	-0.0951309	0.85185	0.950924	no
ENSMUSG00000002550.16	ENSMUSG00000002550.16	Uck1	chr2:32236589-32260159	WT_U	WT_D	OK	28.6648	38.0253	0.407679	-1.74383	0.01255	0.0545672	no
ENSMUSG00000002580.7	ENSMUSG00000002580.7	Mien1	chr11:98412469-98439046	WT_U	WT_D	OK	80.9431	73.8187	-0.132922	0.672771	0.3386	0.604731	no
ENSMUSG00000002603.15	ENSMUSG00000002603.15	Tgfb1	chr7:25687001-25705077	WT_U	WT_D	OK	5.10246	3.62372	-0.493721	2.26891	0.0009	0.00601451	yes
ENSMUSG00000002608.8	ENSMUSG00000002608.8	Ccdc97	chr7:25711105-25719088	WT_U	WT_D	OK	24.0876	22.796	-0.07951	0.260671	0.6729	0.87297	no
ENSMUSG00000002617.14	ENSMUSG00000002617.14	Zfp40	chr17:23173868-23193252	WT_U	WT_D	OK	2.83785	3.33173	0.231473	-0.83781	0.21235	0.452016	no
ENSMUSG00000002625.9	ENSMUSG00000002625.9	Akap8l	chr17:32321424-32350581	WT_U	WT_D	OK	26.3814	30.4765	0.208176	-1.13119	0.10225	0.273468	no
ENSMUSG00000002635.11	ENSMUSG00000002635.11	Pdcd2l	chr7:34184498-34196661	WT_U	WT_D	OK	22.616	22.1151	-0.032312	0.149484	0.81985	0.940059	no
ENSMUSG00000002658.9	ENSMUSG00000002658.9	Gtf2f1	chr17:57003404-57011288	WT_U	WT_D	OK	66.3489	69.1195	0.0590202	-0.345094	0.6235	0.843857	no
ENSMUSG00000002660.7	ENSMUSG00000002660.7	Clpp	chr17:56990263-56996371	WT_U	WT_D	OK	36.089	41.2357	0.192335	-0.981075	0.1607	0.375568	no
ENSMUSG00000002661.14	ENSMUSG00000002661.14	Alkbh7	chr17:56997338-56999322	WT_U	WT_D	OK	10.6415	15.294	0.523264	-2.44975	0.00055	0.00392894	yes
ENSMUSG00000002679.14	ENSMUSG00000002679.14	Med6	chr12:81573556-81595008	WT_U	WT_D	OK	32.4237	31.6497	-0.0348569	0.166746	0.81275	0.937288	no
ENSMUSG00000002718.14	ENSMUSG00000002718.14	Cse1l	chr2:166906039-166946389	WT_U	WT_D	OK	74.1388	66.1183	-0.165179	0.716975	0.2659	0.519557	no
ENSMUSG00000002728.14	ENSMUSG00000002728.14	Naa20	chr2:145902098-145916425	WT_U	WT_D	OK	68.1761	60.887	-0.163132	0.865674	0.19165	0.422746	no
ENSMUSG00000002731.6	ENSMUSG00000002731.6	Prkra	chr2:76629897-76648015	WT_U	WT_D	OK	20.5001	21.3865	0.0610695	-0.295651	0.66935	0.871366	no
ENSMUSG00000002732.14	ENSMUSG00000002732.14	Fkbp7	chr2:76663043-76673116	WT_U	WT_D	OK	7.2865	6.67812	-0.125784	0.549836	0.4328	0.699347	no
ENSMUSG00000002733.8	ENSMUSG00000002733.8	Plekha3	chr2:76675280-76696828	WT_U	WT_D	OK	24.2727	23.8749	-0.0238399	0.134143	0.84665	0.949318	no
ENSMUSG00000002741.9	ENSMUSG00000002741.9	Ykt6	chr11:5955692-5967780	WT_U	WT_D	OK	56.0526	52.7052	-0.088836	0.474631	0.4949	0.752839	no
ENSMUSG00000002748.7	ENSMUSG00000002748.7	Baz1b	chr5:135187263-135246129	WT_U	WT_D	OK	72.1435	71.7611	-0.00766741	0.0418531	0.9503	0.981288	no
ENSMUSG00000002763.16	ENSMUSG00000002763.16	Pex6	chr17:46442447-46831413	WT_U	WT_D	OK	8.71375	8.96807	0.0415038	-0.0432736	0.9468	0.980179	no
ENSMUSG00000002767.13	ENSMUSG00000002767.13	Mrpl2	chr17:46442447-46831413	WT_U	WT_D	OK	62.1201	60.1671	-0.0460853	0.0621909	0.9248	0.973415	no
ENSMUSG00000002768.7	ENSMUSG00000002768.7	Mea1	chr17:46442447-46831413	WT_U	WT_D	OK	59.7158	79.8932	0.41996	-0.57207	0.41075	0.679419	no
ENSMUSG00000002778.12	ENSMUSG00000002778.12	Kdelr1	chr7:45872771-45883731	WT_U	WT_D	OK	46.3082	48.8502	0.0770968	-0.442243	0.5256	0.777272	no
ENSMUSG00000002781.17	ENSMUSG00000002781.17	Tmem143	chr7:45896940-45917413	WT_U	WT_D	OK	12.1438	13.8682	0.191561	-0.781012	0.2632	0.516305	no
ENSMUSG00000002797.9	ENSMUSG00000002797.9	Ggct	chr6:54982579-54992950	WT_U	WT_D	OK	6.72628	5.02669	-0.4202	1.07954	0.1187	0.30482	no
ENSMUSG00000002799.5	ENSMUSG00000002799.5	Jag2	chr12:112908589-112929495	WT_U	WT_D	OK	12.1367	10.0237	-0.275961	1.41066	0.0443	0.147097	no
ENSMUSG00000002804.3	ENSMUSG00000002804.3	Nudt14	chr12:112934732-112942118	WT_U	WT_D	OK	9.68794	8.32069	-0.219487	1.00906	0.152	0.361655	no
ENSMUSG00000002808.6	ENSMUSG00000002808.6	Epdr1	chr13:19591708-19619830	WT_U	WT_D	OK	14.2826	16.3412	0.194255	-0.988179	0.1539	0.364755	no
ENSMUSG00000002812.4	ENSMUSG00000002812.4	Flii	chr11:60699722-60727263	WT_U	WT_D	OK	40.3085	34.3233	-0.231896	1.00419	0.1111	0.290583	no
ENSMUSG00000002814.15	ENSMUSG00000002814.15	Top3a	chr11:60740057-60777365	WT_U	WT_D	OK	12.1445	10.9708	-0.146634	0.666406	0.3069	0.56861	no
ENSMUSG00000002820.5	ENSMUSG00000002820.5	Atg4d	chr9:21265298-21287969	WT_U	WT_D	OK	6.42396	6.71396	0.063701	-0.179694	0.79905	0.932371	no
ENSMUSG00000002825.6	ENSMUSG00000002825.6	Qtrt1	chr9:21411836-21420277	WT_U	WT_D	OK	11.7093	13.737	0.230412	-1.1381	0.106	0.280695	no
ENSMUSG00000002833.10	ENSMUSG00000002833.10	Hdgfrp2	chr17:56079656-56109803	WT_U	WT_D	OK	57.3942	53.6387	-0.0976307	0.57108	0.40925	0.677821	no
ENSMUSG00000002835.8	ENSMUSG00000002835.8	Chaf1a	chr17:56040415-56075028	WT_U	WT_D	OK	36.8479	30.817	-0.257856	1.29892	0.0662	0.198894	no
ENSMUSG00000002844.8	ENSMUSG00000002844.8	Adprh	chr16:38445398-38453493	WT_U	WT_D	OK	57.8225	52.9648	-0.126597	0.737919	0.2875	0.545549	no
ENSMUSG00000002845.14	ENSMUSG00000002845.14	Tmem39a	chr16:38558697-38592162	WT_U	WT_D	OK	24.358	28.8359	0.24347	-0.8947	0.1933	0.42529	no
ENSMUSG00000002846.9	ENSMUSG00000002846.9	Timmdc1	chr16:38498346-38522663	WT_U	WT_D	OK	30.1976	28.7991	-0.0684102	0.339527	0.62525	0.844742	no
ENSMUSG00000002870.8	ENSMUSG00000002870.8	Mcm2	chr6:88883473-88898780	WT_U	WT_D	OK	79.9281	78.3813	-0.0281933	0.148704	0.81125	0.936734	no
ENSMUSG00000002871.14	ENSMUSG00000002871.14	Tpra1	chr6:88902250-88912238	WT_U	WT_D	OK	14.4033	14.8043	0.0396169	-0.0991465	0.88265	0.960521	no
ENSMUSG00000002881.14	ENSMUSG00000002881.14	Nab1	chr1:52457293-52500679	WT_U	WT_D	OK	30.3587	25.3968	-0.257463	1.331	0.03635	0.126387	no
ENSMUSG00000002885.14	ENSMUSG00000002885.14	Adgre5	chr8:83715176-83741326	WT_U	WT_D	OK	1.36018	0.981266	-0.471081	0.297382	0.57015	0.810542	no
ENSMUSG00000002897.5	ENSMUSG00000002897.5	Il17ra	chr6:120463246-120487559	WT_U	WT_D	OK	3.35576	3.05002	-0.137821	0.418118	0.5438	0.791178	no
ENSMUSG00000002910.10	ENSMUSG00000002910.10	Arrdc2	chr8:70835154-70839720	WT_U	WT_D	OK	3.98147	3.6695	-0.117718	0.560925	0.42125	0.689119	no
ENSMUSG00000002948.18	ENSMUSG00000002948.18	Map2k7	chr8:4238739-4251423	WT_U	WT_D	OK	37.0957	44.1964	0.252677	-1.28033	0.0633	0.192478	no
ENSMUSG00000002949.14	ENSMUSG00000002949.14	Timm44	chr8:4259730-4275913	WT_U	WT_D	OK	80.3695	79.9179	-0.00812943	0.0419935	0.95205	0.981822	no
ENSMUSG00000002957.11	ENSMUSG00000002957.11	Ap2a2	chr7:141562172-141633011	WT_U	WT_D	OK	52.1463	46.0475	-0.179442	1.03982	0.12975	0.324068	no
ENSMUSG00000002963.16	ENSMUSG00000002963.16	Pnkp	chr7:44857138-44862992	WT_U	WT_D	OK	14.7853	15.8859	0.103583	-0.452838	0.49445	0.752406	no
ENSMUSG00000002968.7	ENSMUSG00000002968.7	Med25	chr7:44879390-44892397	WT_U	WT_D	OK	14.9652	13.4738	-0.151455	0.768275	0.2737	0.52899	no
ENSMUSG00000002981.9	ENSMUSG00000002981.9	Clptm1	chr7:19631580-19665030	WT_U	WT_D	OK	21.683	21.7857	0.00681709	-0.0398142	0.95335	0.982109	no
ENSMUSG00000002983.16	ENSMUSG00000002983.16	Relb	chr7:19606216-19629438	WT_U	WT_D	OK	3.51919	2.32221	-0.599745	2.59898	0.00015	0.00125317	yes
ENSMUSG00000002984.16	ENSMUSG00000002984.16	Tomm40	chr7:19701312-19749573	WT_U	WT_D	OK	49.2836	48.2912	-0.0293473	0.145565	0.8386	0.946563	no
ENSMUSG00000002985.15	ENSMUSG00000002985.15	Apoe	chr7:19696108-19699166	WT_U	WT_D	OK	5.96039	5.32038	-0.163877	0.707023	0.30585	0.567388	no
ENSMUSG00000002996.17	ENSMUSG00000002996.17	Hbp1	chr12:31654868-31950535	WT_U	WT_D	OK	12.7539	14.7695	0.211683	-0.618598	0.3569	0.624305	no
ENSMUSG00000002997.15	ENSMUSG00000002997.15	Prkar2b	chr12:31958475-32061296	WT_U	WT_D	OK	20.4826	24.5763	0.262869	-1.37156	0.0501	0.161532	no
ENSMUSG00000003031.14	ENSMUSG00000003031.14	Cdkn1b	chr6:134920400-134925513	WT_U	WT_D	OK	63.0289	70.7585	0.16689	-0.905527	0.2035	0.439954	no
ENSMUSG00000003032.8	ENSMUSG00000003032.8	Klf4	chr4:55527142-55532466	WT_U	WT_D	OK	4.18256	3.60245	-0.215408	0.996666	0.1565	0.369031	no
ENSMUSG00000003033.14	ENSMUSG00000003033.14	Ap1m1	chr8:72240017-72257385	WT_U	WT_D	OK	59.2959	65.1765	0.13642	-0.742329	0.2822	0.538962	no
ENSMUSG00000003037.16	ENSMUSG00000003037.16	Rab8a	chr8:72161199-72183904	WT_U	WT_D	OK	93.9391	93.2545	-0.0105524	0.0371213	0.95585	0.982815	no
ENSMUSG00000003038.15	ENSMUSG00000003038.15	Hmgn2	chr4:133964737-133968650	WT_U	WT_D	OK	574.244	575.804	0.00391393	-0.0224341	0.97335	0.988507	no
ENSMUSG00000003039.8	ENSMUSG00000003039.8	Fam32a	chr8:72219729-72223764	WT_U	WT_D	OK	22.6823	29.4064	0.374563	-1.91575	0.0055	0.0278165	yes
ENSMUSG00000003062.12	ENSMUSG00000003062.12	Stard3nl	chr13:19357675-19395795	WT_U	WT_D	OK	14.2446	16.8723	0.244242	-1.05678	0.1249	0.315876	no
ENSMUSG00000003068.15	ENSMUSG00000003068.15	Stk11	chr10:80115802-80145818	WT_U	WT_D	OK	47.9045	44.9419	-0.0921001	0.215295	0.74725	0.910581	no
ENSMUSG00000003070.6	ENSMUSG00000003070.6	Efna2	chr10:80179481-80190010	WT_U	WT_D	OK	4.40712	4.73463	0.103416	-0.495563	0.47785	0.738177	no
ENSMUSG00000003072.15	ENSMUSG00000003072.15	Atp5d	chr10:80115802-80145818	WT_U	WT_D	OK	332.628	292.315	-0.186386	0.900652	0.19625	0.429657	no
ENSMUSG00000003099.11	ENSMUSG00000003099.11	Ppp5c	chr7:17004639-17027924	WT_U	WT_D	OK	70.5989	61.1969	-0.206187	1.06215	0.1201	0.30743	no
ENSMUSG00000003119.14	ENSMUSG00000003119.14	Cdk12	chr11:98203058-98278504	WT_U	WT_D	OK	21.7982	23.5266	0.110084	-0.605948	0.3771	0.646016	no
ENSMUSG00000003123.15	ENSMUSG00000003123.15	Lipe	chr7:25376818-25566417	WT_U	WT_D	OK	1.63508	2.39538	0.550893	-1.89118	0.0032	0.0176662	yes
ENSMUSG00000003131.6	ENSMUSG00000003131.6	Pafah1b2	chr9:45965310-45984871	WT_U	WT_D	OK	41.1604	40.5714	-0.0207939	0.121803	0.86325	0.95462	no
ENSMUSG00000003135.15	ENSMUSG00000003135.15	Cnot11	chr1:39534991-39546889	WT_U	WT_D	OK	32.5799	31.3836	-0.0539713	0.313198	0.65325	0.861805	no
ENSMUSG00000003153.10	ENSMUSG00000003153.10	Slc2a3	chr6:122727808-122801640	WT_U	WT_D	OK	59.045	34.948	-0.756605	2.8301	5e-05	0.00046241	yes
ENSMUSG00000003154.15	ENSMUSG00000003154.15	Foxj2	chr6:122813618-122845366	WT_U	WT_D	OK	6.1803	5.42354	-0.188442	0.631095	0.34375	0.610384	no
ENSMUSG00000003161.15	ENSMUSG00000003161.15	Sri	chr5:8037293-8069379	WT_U	WT_D	OK	27.0517	24.3858	-0.149678	0.580391	0.40405	0.672873	no
ENSMUSG00000003166.19	ENSMUSG00000003166.19	Dgcr2	chr16:17835275-17894145	WT_U	WT_D	OK	24.9855	25.3919	0.0232773	-0.128253	0.85505	0.951908	no
ENSMUSG00000003184.14	ENSMUSG00000003184.14	Irf3	chr7:44997647-45002847	WT_U	WT_D	OK	16.6463	13.178	-0.33707	1.67165	0.01745	0.0711948	no
ENSMUSG00000003190.11	ENSMUSG00000003190.11	Bcl2l12	chr7:44986899-44997579	WT_U	WT_D	OK	1.00067	0.758006	-0.400685	0.767677	0.2685	0.52264	no
ENSMUSG00000003198.9	ENSMUSG00000003198.9	Zfp959	chr17:55892119-55898928	WT_U	WT_D	OK	4.86892	5.31852	0.127423	-0.613461	0.3851	0.654118	no
ENSMUSG00000003199.16	ENSMUSG00000003199.16	Mpnd	chr17:56005710-56036637	WT_U	WT_D	OK	43.6165	51.3193	0.234627	-0.971622	0.16095	0.375985	no
ENSMUSG00000003200.9	ENSMUSG00000003200.9	Sh3gl1	chr17:56005710-56036637	WT_U	WT_D	OK	23.7366	23.4038	-0.0203705	0.0761233	0.9144	0.96994	no
ENSMUSG00000003208.8	ENSMUSG00000003208.8	Ccdc94	chr17:55952622-55967949	WT_U	WT_D	OK	12.4037	12.1904	-0.0250251	0.122421	0.8593	0.953546	no
ENSMUSG00000003226.6	ENSMUSG00000003226.6	Ranbp2	chr10:58446851-58494155	WT_U	WT_D	OK	54.6032	55.97	0.0356682	-0.207163	0.7673	0.919426	no
ENSMUSG00000003228.8	ENSMUSG00000003228.8	Grk5	chr19:60889748-61140840	WT_U	WT_D	OK	6.77133	6.08456	-0.154286	0.596838	0.3942	0.663244	no
ENSMUSG00000003233.11	ENSMUSG00000003233.11	Dvl3	chr16:20511132-20532520	WT_U	WT_D	OK	25.9104	25.3777	-0.02997	0.173978	0.80585	0.934775	no
ENSMUSG00000003234.15	ENSMUSG00000003234.15	Abcf3	chr16:20548576-20561379	WT_U	WT_D	OK	20.8491	21.5022	0.0444992	-0.170189	0.80985	0.936174	no
ENSMUSG00000003235.12	ENSMUSG00000003235.12	Eif2b5	chr16:20498816-20509955	WT_U	WT_D	OK	40.0503	37.5557	-0.0927812	0.541648	0.4353	0.701565	no
ENSMUSG00000003269.14	ENSMUSG00000003269.14	Cyth2	chr7:45806636-45814581	WT_U	WT_D	OK	97.1223	120.012	0.305304	-1.414	0.0405	0.137249	no
ENSMUSG00000003299.9	ENSMUSG00000003299.9	Mrpl4	chr9:21002736-21008835	WT_U	WT_D	OK	20.1188	19.5617	-0.0405125	0.203385	0.7683	0.91998	no
ENSMUSG00000003308.14	ENSMUSG00000003308.14	Keap1	chr9:21225370-21239332	WT_U	WT_D	OK	15.5946	18.5048	0.246853	-1.17963	0.06575	0.197951	no
ENSMUSG00000003316.14	ENSMUSG00000003316.14	Glg1	chr8:111154420-111259216	WT_U	WT_D	OK	38.2276	36.8048	-0.0547207	0.301387	0.66	0.865944	no
ENSMUSG00000003344.14	ENSMUSG00000003344.14	Btbd2	chr10:80642616-80657071	WT_U	WT_D	OK	21.765	19.9156	-0.128111	0.50061	0.4779	0.738209	no
ENSMUSG00000003345.15	ENSMUSG00000003345.15	Csnk1g2	chr10:80622779-80640771	WT_U	WT_D	OK	47.7843	44.4916	-0.103004	0.604626	0.38085	0.649774	no
ENSMUSG00000003346.14	ENSMUSG00000003346.14	Abhd17a	chr10:80583653-80590341	WT_U	WT_D	OK	18.0239	17.3517	-0.0548342	0.273482	0.6993	0.887973	no
ENSMUSG00000003348.9	ENSMUSG00000003348.9	Mob3a	chr10:80681837-80701820	WT_U	WT_D	OK	9.00824	9.89242	0.135078	-0.674565	0.33955	0.605758	no
ENSMUSG00000003352.13	ENSMUSG00000003352.13	Cacnb3	chr15:98632219-98644530	WT_U	WT_D	OK	18.9107	18.6476	-0.0202128	0.103969	0.8843	0.960939	no
ENSMUSG00000003355.6	ENSMUSG00000003355.6	Fkbp11	chr15:98724372-98728198	WT_U	WT_D	OK	26.1691	22.0582	-0.246549	1.21015	0.08115	0.231213	no
ENSMUSG00000003360.14	ENSMUSG00000003360.14	Ddx23	chr15:98645133-98662889	WT_U	WT_D	OK	100.23	89.8797	-0.157247	0.373696	0.57455	0.813025	no
ENSMUSG00000003363.15	ENSMUSG00000003363.15	Pld3	chr7:27531999-27553218	WT_U	WT_D	OK	26.8798	27.3188	0.0233717	-0.0937464	0.88455	0.961044	no
ENSMUSG00000003378.9	ENSMUSG00000003378.9	Grik5	chr7:25009848-25072346	WT_U	WT_D	OK	17.4279	21.2525	0.286234	-1.10184	0.0983	0.265842	no
ENSMUSG00000003380.11	ENSMUSG00000003380.11	Rabac1	chr7:24969751-24972754	WT_U	WT_D	OK	51.4029	52.8115	0.0390024	-0.196589	0.7772	0.923732	no
ENSMUSG00000003382.18	ENSMUSG00000003382.18	Etv3	chr3:87525406-87540156	WT_U	WT_D	OK	6.68397	8.42181	0.333425	-1.65416	0.0177	0.0720242	no
ENSMUSG00000003402.13	ENSMUSG00000003402.13	Prkcsh	chr9:22003034-22014219	WT_U	WT_D	OK	55.5015	55.829	0.00848795	-0.0495643	0.9454	0.979782	no
ENSMUSG00000003410.7	ENSMUSG00000003410.7	Elavl3	chr9:22015004-22052023	WT_U	WT_D	OK	25.113	25.0689	-0.00253569	0.0148299	0.9846	0.992525	no
ENSMUSG00000003411.10	ENSMUSG00000003411.10	Rab3b	chr4:108879062-108972077	WT_U	WT_D	OK	1.79143	1.21006	-0.566033	1.89465	0.00705	0.0341805	yes
ENSMUSG00000003420.7	ENSMUSG00000003420.7	Fcgrt	chr7:45092992-45103822	WT_U	WT_D	OK	1.43952	1.54739	0.104249	-0.428896	0.541	0.78919	no
ENSMUSG00000003421.12	ENSMUSG00000003421.12	Nosip	chr7:45062428-45078503	WT_U	WT_D	OK	18.5222	18.751	0.0177121	-0.0910034	0.89555	0.964324	no
ENSMUSG00000003423.14	ENSMUSG00000003423.14	Pih1d1	chr7:45140683-45160064	WT_U	WT_D	OK	31.8882	34.5427	0.115358	-0.495695	0.48225	0.742046	no
ENSMUSG00000003429.10	ENSMUSG00000003429.10	Rps11	chr7:45122387-45124389	WT_U	WT_D	OK	880.307	915.674	0.0568273	-0.331447	0.6276	0.846422	no
ENSMUSG00000003435.8	ENSMUSG00000003435.8	Supt5	chr7:28314897-28338719	WT_U	WT_D	OK	48.407	48.0696	-0.0100909	0.0590884	0.92985	0.97491	no
ENSMUSG00000003437.14	ENSMUSG00000003437.14	Paf1	chr7:28392950-28399388	WT_U	WT_D	OK	121.009	106.974	-0.177854	0.654327	0.3473	0.614106	no
ENSMUSG00000003438.17	ENSMUSG00000003438.17	Timm50	chr7:28305515-28312072	WT_U	WT_D	OK	61.7323	62.0902	0.00834004	-0.037004	0.9576	0.983484	no
ENSMUSG00000003444.8	ENSMUSG00000003444.8	Med29	chr7:28386145-28392708	WT_U	WT_D	OK	14.5679	13.4637	-0.113718	0.563335	0.41605	0.684288	no
ENSMUSG00000003452.15	ENSMUSG00000003452.15	Bicd1	chr6:149408885-149563329	WT_U	WT_D	OK	9.35172	16.0703	0.781093	-2.95179	5e-05	0.00046241	yes
ENSMUSG00000003458.12	ENSMUSG00000003458.12	Ncstn	chr1:172066012-172122330	WT_U	WT_D	OK	28.7899	28.4179	-0.0187628	0.0377737	0.95135	0.981573	no
ENSMUSG00000003464.13	ENSMUSG00000003464.13	Pex19	chr1:172126754-172136493	WT_U	WT_D	OK	31.9458	35.5368	0.153688	-0.738401	0.2423	0.490479	no
ENSMUSG00000003500.13	ENSMUSG00000003500.13	Impdh1	chr6:29200433-29216364	WT_U	WT_D	OK	30.0111	28.9568	-0.051594	0.291571	0.67165	0.87232	no
ENSMUSG00000003518.13	ENSMUSG00000003518.13	Dusp3	chr11:101971142-101992264	WT_U	WT_D	OK	21.5512	22.2354	0.0450902	-0.1297	0.82855	0.943231	no
ENSMUSG00000003527.8	ENSMUSG00000003527.8	Dgcr14	chr16:17900710-17911348	WT_U	WT_D	OK	9.8758	9.93949	0.00927421	-0.0468717	0.94815	0.980735	no
ENSMUSG00000003528.14	ENSMUSG00000003528.14	Slc25a1	chr16:17925210-17928219	WT_U	WT_D	OK	102.233	113.469	0.150437	-0.698888	0.31795	0.58094	no
ENSMUSG00000003531.14	ENSMUSG00000003531.14	Dgcr6	chr16:18052859-18090203	WT_U	WT_D	OK	10.3312	13.436	0.379096	-1.75454	0.0128	0.0554881	no
ENSMUSG00000003534.17	ENSMUSG00000003534.17	Ddr1	chr17:35681566-35708244	WT_U	WT_D	OK	15.8577	14.1457	-0.16482	0.718993	0.278	0.533923	no
ENSMUSG00000003541.6	ENSMUSG00000003541.6	Ier3	chr17:35821683-35822923	WT_U	WT_D	OK	27.0771	23.3376	-0.214417	1.07642	0.12355	0.313585	no
ENSMUSG00000003546.9	ENSMUSG00000003546.9	Klc4	chr17:46442447-46831413	WT_U	WT_D	OK	3.50243	3.77898	0.109641	-0.0614136	0.93045	0.975131	no
ENSMUSG00000003549.9	ENSMUSG00000003549.9	Ercc1	chr7:19344777-19356524	WT_U	WT_D	OK	10.0498	9.4131	-0.094425	0.422076	0.531	0.781451	no
ENSMUSG00000003559.7	ENSMUSG00000003559.7	As3mt	chr19:46707442-46741095	WT_U	WT_D	OK	30.4841	35.5047	0.219953	-1.19451	0.0864	0.24194	no
ENSMUSG00000003573.15	ENSMUSG00000003573.15	Homer3	chr8:70282826-70302489	WT_U	WT_D	OK	18.0661	20.385	0.174223	-0.49691	0.4744	0.735308	no
ENSMUSG00000003575.13	ENSMUSG00000003575.13	Crtc1	chr8:70382354-70439579	WT_U	WT_D	OK	7.88573	9.27526	0.234143	-0.655624	0.3365	0.602603	no
ENSMUSG00000003581.14	ENSMUSG00000003581.14	Rnf215	chr11:4135201-4160293	WT_U	WT_D	OK	6.43408	6.70723	0.0599832	-0.19766	0.77495	0.922775	no
ENSMUSG00000003585.13	ENSMUSG00000003585.13	Sec14l2	chr11:4097038-4123415	WT_U	WT_D	OK	1.60699	1.12475	-0.514757	1.21744	0.07175	0.211044	no
ENSMUSG00000003604.14	ENSMUSG00000003604.14	Aven	chr2:112492963-113217096	WT_U	WT_D	OK	23.3383	23.6588	0.0196774	-0.0740655	0.9155	0.970344	no
ENSMUSG00000003623.4	ENSMUSG00000003623.4	Crot	chr5:8966032-8997427	WT_U	WT_D	OK	14.0925	14.9231	0.0826197	-0.413849	0.5598	0.803155	no
ENSMUSG00000003644.17	ENSMUSG00000003644.17	Rps6ka1	chr4:133847289-133887797	WT_U	WT_D	OK	32.0422	29.2048	-0.133768	0.600356	0.28565	0.543252	no
ENSMUSG00000003660.10	ENSMUSG00000003660.10	Snrnp200	chr2:127208385-127240451	WT_U	WT_D	OK	47.4238	45.7058	-0.053234	0.269984	0.66985	0.871586	no
ENSMUSG00000003662.10	ENSMUSG00000003662.10	Ciao1	chr2:127240937-127247816	WT_U	WT_D	OK	41.9496	43.9398	0.0668712	-0.270865	0.69255	0.884355	no
ENSMUSG00000003680.15	ENSMUSG00000003680.15	Taf6l	chr19:8772521-8786417	WT_U	WT_D	OK	19.2286	19.8184	0.0435868	-0.18526	0.79045	0.929153	no
ENSMUSG00000003721.14	ENSMUSG00000003721.14	Insig2	chr1:121304352-121332589	WT_U	WT_D	OK	12.3946	13.1142	0.0814181	-0.275203	0.6538	0.862179	no
ENSMUSG00000003731.13	ENSMUSG00000003731.13	Kpna6	chr4:129643979-129672767	WT_U	WT_D	OK	20.0954	18.3277	-0.13284	0.560362	0.3004	0.561216	no
ENSMUSG00000003752.9	ENSMUSG00000003752.9	Itpkc	chr7:27187004-27228661	WT_U	WT_D	OK	3.47108	3.73496	0.105708	-0.17894	0.783	0.926154	no
ENSMUSG00000003762.13	ENSMUSG00000003762.13	Adck4	chr7:27233022-27282144	WT_U	WT_D	OK	4.77414	4.521	-0.078599	0.176693	0.7937	0.93018	no
ENSMUSG00000003778.14	ENSMUSG00000003778.14	Brd8	chr18:34598614-34624601	WT_U	WT_D	OK	58.1458	57.5133	-0.0157794	0.052193	0.94005	0.978116	no
ENSMUSG00000003779.15	ENSMUSG00000003779.15	Kif20a	chr18:34624623-34651735	WT_U	WT_D	OK	42.2012	38.4035	-0.136046	0.636457	0.36525	0.633405	no
ENSMUSG00000003808.18	ENSMUSG00000003808.18	Farsa	chr8:84856988-84869257	WT_U	WT_D	OK	54.0285	53.3579	-0.0180187	0.100923	0.88405	0.96092	no
ENSMUSG00000003809.14	ENSMUSG00000003809.14	Gcdh	chr8:84872110-84893921	WT_U	WT_D	OK	6.92241	6.38356	-0.116913	0.450802	0.51015	0.76521	no
ENSMUSG00000003810.12	ENSMUSG00000003810.12	Mast2	chr4:116306761-116464183	WT_U	WT_D	OK	29.5298	28.0896	-0.0721355	0.261085	0.6749	0.873913	no
ENSMUSG00000003812.13	ENSMUSG00000003812.13	Dnase2a	chr8:84908559-84937359	WT_U	WT_D	OK	1.03897	0.755134	-0.460349	0.217686	0.64085	0.854367	no
ENSMUSG00000003813.15	ENSMUSG00000003813.15	Rad23a	chr8:84831521-84840665	WT_U	WT_D	OK	66.6267	64.3071	-0.0511224	0.234776	0.7312	0.903963	no
ENSMUSG00000003814.8	ENSMUSG00000003814.8	Calr	chr8:84841849-84846934	WT_U	WT_D	OK	626.701	677.456	0.11235	-0.568807	0.4155	0.68372	no
ENSMUSG00000003847.16	ENSMUSG00000003847.16	Nfat5	chr8:107293469-107379517	WT_U	WT_D	OK	43.3026	45.1349	0.0597898	-0.150715	0.7608	0.916415	no
ENSMUSG00000003848.14	ENSMUSG00000003848.14	Nob1	chr8:107412485-107425051	WT_U	WT_D	OK	58.1751	57.6581	-0.0128785	0.0686688	0.9159	0.97043	no
ENSMUSG00000003849.8	ENSMUSG00000003849.8	Nqo1	chr8:107388224-107403206	WT_U	WT_D	OK	3.85813	3.20206	-0.268901	1.22231	0.08015	0.229139	no
ENSMUSG00000003863.16	ENSMUSG00000003863.16	Ppfia3	chr7:45339125-45370583	WT_U	WT_D	OK	5.97778	6.97751	0.223102	-1.03452	0.11845	0.304412	no
ENSMUSG00000003865.14	ENSMUSG00000003865.14	Gys1	chr7:45420819-45456619	WT_U	WT_D	OK	17.5351	22.3994	0.353214	-0.960804	0.09165	0.25254	no
ENSMUSG00000003868.12	ENSMUSG00000003868.12	Ruvbl2	chr7:45420819-45456619	WT_U	WT_D	OK	85.8325	87.6722	0.0305954	-0.125597	0.8591	0.953525	no
ENSMUSG00000003873.10	ENSMUSG00000003873.10	Bax	chr7:45461694-45466898	WT_U	WT_D	OK	90.6512	102.408	0.17593	-1.02306	0.1436	0.347654	no
ENSMUSG00000003923.14	ENSMUSG00000003923.14	Tfam	chr10:71225463-71238280	WT_U	WT_D	OK	60.7231	66.8212	0.13806	-0.475769	0.4908	0.74939	no
ENSMUSG00000003929.10	ENSMUSG00000003929.10	Zfp81	chr17:33329341-33358878	WT_U	WT_D	OK	7.83136	8.3296	0.0889843	-0.483426	0.48845	0.747636	no
ENSMUSG00000003948.16	ENSMUSG00000003948.16	Mmd	chr11:90187683-90278589	WT_U	WT_D	OK	31.7547	51.7446	0.704438	-4.07592	5e-05	0.00046241	yes
ENSMUSG00000003949.16	ENSMUSG00000003949.16	Hlf	chr11:90336535-90390895	WT_U	WT_D	OK	6.11098	6.05569	-0.0131124	0.0567692	0.93315	0.976052	no
ENSMUSG00000003955.7	ENSMUSG00000003955.7	Fam162a	chr16:36043843-36071515	WT_U	WT_D	OK	78.4314	52.128	-0.589373	2.98122	5e-05	0.00046241	yes
ENSMUSG00000003970.8	ENSMUSG00000003970.8	Rpl8	chr15:76904070-76906318	WT_U	WT_D	OK	1918.75	1821.62	-0.0749447	0.397912	0.57795	0.815005	no
ENSMUSG00000003992.14	ENSMUSG00000003992.14	Ssbp2	chr13:91460282-91786148	WT_U	WT_D	OK	71.6707	51.7657	-0.469387	2.5314	0.00035	0.00265006	yes
ENSMUSG00000004018.9	ENSMUSG00000004018.9	Fancl	chr11:26386134-26593999	WT_U	WT_D	OK	3.97335	4.58617	0.206934	-0.579977	0.40055	0.669532	no
ENSMUSG00000004031.13	ENSMUSG00000004031.13	Brinp2	chr1:158245268-158356326	WT_U	WT_D	OK	3.44905	2.65838	-0.375652	1.83689	0.0082	0.0387017	yes
ENSMUSG00000004032.10	ENSMUSG00000004032.10	Gstm5	chr3:107877228-107898686	WT_U	WT_D	OK	50.0946	49.8393	-0.00737129	0.033209	0.9625	0.985093	no
ENSMUSG00000004040.16	ENSMUSG00000004040.16	Stat3	chr11:100859350-100939540	WT_U	WT_D	OK	26.8421	17.9936	-0.577014	2.53228	5e-05	0.00046241	yes
ENSMUSG00000004043.14	ENSMUSG00000004043.14	Stat5a	chr11:100859350-100939540	WT_U	WT_D	OK	1.73293	1.44233	-0.264812	0.262892	0.6115	0.836771	no
ENSMUSG00000004044.9	ENSMUSG00000004044.9	Ptrf	chr11:100956732-100970887	WT_U	WT_D	OK	9.51972	5.10068	-0.90023	4.37447	5e-05	0.00046241	yes
ENSMUSG00000004054.8	ENSMUSG00000004054.8	Map3k11	chr19:5689130-5702862	WT_U	WT_D	OK	6.95503	7.17971	0.0458688	-0.231588	0.73745	0.906808	no
ENSMUSG00000004056.15	ENSMUSG00000004056.15	Akt2	chr7:27591551-27640826	WT_U	WT_D	OK	31.7126	29.3435	-0.112015	0.550433	0.40895	0.677492	no
ENSMUSG00000004069.16	ENSMUSG00000004069.16	Dnaja3	chr16:4626132-4707695	WT_U	WT_D	OK	35.5186	50.6456	0.511862	-2.54356	0.00035	0.00265006	yes
ENSMUSG00000004070.15	ENSMUSG00000004070.15	Hmox2	chr16:4726360-4790292	WT_U	WT_D	OK	42.9307	37.0046	-0.214305	0.877297	0.18195	0.408325	no
ENSMUSG00000004071.12	ENSMUSG00000004071.12	Cdip1	chr16:4726360-4790292	WT_U	WT_D	OK	16.124	19.4058	0.267278	-0.92607	0.165	0.382158	no
ENSMUSG00000004096.8	ENSMUSG00000004096.8	Cwc15	chr9:14500616-14510577	WT_U	WT_D	OK	71.8801	70.2122	-0.0338707	0.197068	0.78215	0.925816	no
ENSMUSG00000004099.15	ENSMUSG00000004099.15	Dnmt1	chr9:20907205-20959888	WT_U	WT_D	OK	67.4789	59.9952	-0.169589	0.983214	0.1612	0.376324	no
ENSMUSG00000004100.11	ENSMUSG00000004100.11	Ppan	chr9:20888174-20892178	WT_U	WT_D	OK	92.7185	92.2772	-0.006883	0.0270414	0.96975	0.98752	no
ENSMUSG00000004105.8	ENSMUSG00000004105.8	Angptl2	chr2:33133416-33371486	WT_U	WT_D	OK	4.34188	2.21428	-0.971482	2.13103	0.00315	0.0174353	yes
ENSMUSG00000004113.18	ENSMUSG00000004113.18	Cacna1b	chr2:24603886-24763152	WT_U	WT_D	OK	15.9429	16.8194	0.0772122	-0.163847	0.7543	0.914003	no
ENSMUSG00000004127.12	ENSMUSG00000004127.12	Trmt10a	chr3:138089853-138159821	WT_U	WT_D	OK	23.1525	17.7215	-0.385667	0.974426	0.15845	0.371923	no
ENSMUSG00000004151.16	ENSMUSG00000004151.16	Etv1	chr12:38779379-38868215	WT_U	WT_D	OK	10.5283	7.21313	-0.545575	1.53455	0.0121	0.0530411	no
ENSMUSG00000004207.14	ENSMUSG00000004207.14	Psap	chr10:60277626-60302597	WT_U	WT_D	OK	263.128	253.378	-0.0544735	0.316823	0.65015	0.859797	no
ENSMUSG00000004221.16	ENSMUSG00000004221.16	Ikbkg	chrX:74393289-74453854	WT_U	WT_D	OK	21.4376	22.9338	0.097332	-0.159839	0.82085	0.94028	no
ENSMUSG00000004233.14	ENSMUSG00000004233.14	Wars2	chr3:99141067-99239186	WT_U	WT_D	OK	3.92407	4.42262	0.172551	-0.357297	0.5928	0.824641	no
ENSMUSG00000004263.15	ENSMUSG00000004263.15	Atn1	chr6:124739182-124756524	WT_U	WT_D	OK	51.8188	54.3459	0.0686956	-0.246984	0.69465	0.885431	no
ENSMUSG00000004264.17	ENSMUSG00000004264.17	Phb2	chr6:124712335-124718831	WT_U	WT_D	OK	170.226	158.655	-0.101558	0.56162	0.4089	0.677454	no
ENSMUSG00000004266.15	ENSMUSG00000004266.15	Ptpn6	chr6:124720706-124738714	WT_U	WT_D	OK	1.04364	0.523152	-0.996322	2.12211	0.00035	0.00265006	yes
ENSMUSG00000004267.16	ENSMUSG00000004267.16	Eno2	chr6:124760052-124769673	WT_U	WT_D	OK	25.9561	24.8787	-0.0611625	0.223524	0.73475	0.90567	no
ENSMUSG00000004268.11	ENSMUSG00000004268.11	Emg1	chr6:124663026-124712178	WT_U	WT_D	OK	93.6199	86.5815	-0.112756	0.444663	0.5116	0.766501	no
ENSMUSG00000004270.13	ENSMUSG00000004270.13	Lpcat3	chr6:124663026-124712178	WT_U	WT_D	OK	37.8313	53.1729	0.491111	-1.35385	0.04815	0.156641	no
ENSMUSG00000004285.12	ENSMUSG00000004285.12	Atp6v1f	chr6:29467717-29470512	WT_U	WT_D	OK	46.07	56.4441	0.292995	-1.47155	0.0353	0.123546	no
ENSMUSG00000004317.14	ENSMUSG00000004317.14	Clcn5	chrX:7153809-7319358	WT_U	WT_D	OK	12.5616	13.8683	0.142771	-0.326718	0.5343	0.783901	no
ENSMUSG00000004319.15	ENSMUSG00000004319.15	Clcn3	chr8:60910388-60983300	WT_U	WT_D	OK	47.4749	58.7895	0.308394	-1.73029	0.01315	0.0567133	no
ENSMUSG00000004347.16	ENSMUSG00000004347.16	Pde1c	chr6:56069803-56569103	WT_U	WT_D	OK	4.45126	4.4537	0.00079061	-0.00161537	0.9979	0.998917	no
ENSMUSG00000004356.7	ENSMUSG00000004356.7	Utp20	chr10:88746606-88826814	WT_U	WT_D	OK	16.2295	17.4211	0.102217	-0.598542	0.39475	0.663847	no
ENSMUSG00000004360.8	ENSMUSG00000004360.8	9330159F19Rik	chr10:29211642-29230779	WT_U	WT_D	OK	6.37951	6.54402	0.0367315	-0.187062	0.78475	0.926868	no
ENSMUSG00000004364.14	ENSMUSG00000004364.14	Cul3	chr1:80264922-80340480	WT_U	WT_D	OK	90.803	85.9618	-0.0790443	0.393171	0.5486	0.794952	no
ENSMUSG00000004383.17	ENSMUSG00000004383.17	Large	chr8:72814598-73353540	WT_U	WT_D	OK	10.9129	11.3666	0.0587662	-0.298049	0.6702	0.871725	no
ENSMUSG00000004393.10	ENSMUSG00000004393.10	Ddx56	chr11:6258918-6267772	WT_U	WT_D	OK	33.7818	35.5901	0.0752298	-0.356441	0.6077	0.834581	no
ENSMUSG00000004394.12	ENSMUSG00000004394.12	Tmed4	chr11:6270368-6274870	WT_U	WT_D	OK	52.4442	59.0229	0.170492	-0.901302	0.19615	0.429467	no
ENSMUSG00000004446.12	ENSMUSG00000004446.12	Bid	chr6:120836211-120916853	WT_U	WT_D	OK	13.5195	14.6612	0.116961	-0.271788	0.64145	0.854724	no
ENSMUSG00000004451.14	ENSMUSG00000004451.14	Ralb	chr1:119470304-119504794	WT_U	WT_D	OK	23.3806	21.4117	-0.126913	0.637523	0.35635	0.623681	no
ENSMUSG00000004455.16	ENSMUSG00000004455.16	Ppp1cc	chr5:122158277-122175273	WT_U	WT_D	OK	109.856	98.1554	-0.162474	0.843804	0.2061	0.443623	no
ENSMUSG00000004460.16	ENSMUSG00000004460.16	Dnajb11	chr16:22857844-22879634	WT_U	WT_D	OK	88.8381	76.5652	-0.21449	1.25078	0.07005	0.207456	no
ENSMUSG00000004462.6	ENSMUSG00000004462.6	Tbccd1	chr16:22813214-22857569	WT_U	WT_D	OK	7.43097	7.86966	0.0827508	-0.413827	0.551	0.79659	no
ENSMUSG00000004500.8	ENSMUSG00000004500.8	Zfp324	chr7:12965837-12974236	WT_U	WT_D	OK	3.55447	4.19359	0.238551	-1.18428	0.09125	0.251743	no
ENSMUSG00000004508.6	ENSMUSG00000004508.6	Gab2	chr7:97081585-97308946	WT_U	WT_D	OK	8.84528	9.50884	0.104362	-0.467557	0.50345	0.759561	no
ENSMUSG00000004530.12	ENSMUSG00000004530.12	Coro1c	chr5:113842435-113908758	WT_U	WT_D	OK	111.501	109.511	-0.0259809	0.124104	0.8304	0.943761	no
ENSMUSG00000004535.12	ENSMUSG00000004535.12	Tax1bp1	chr6:52713343-52766780	WT_U	WT_D	OK	43.1565	45.7435	0.0839889	-0.480411	0.48195	0.741789	no
ENSMUSG00000004558.14	ENSMUSG00000004558.14	Ndrg2	chr14:51905270-51913488	WT_U	WT_D	OK	6.16645	3.02849	-1.02584	4.90648	5e-05	0.00046241	yes
ENSMUSG00000004561.14	ENSMUSG00000004561.14	Mettl17	chr14:51884841-51896745	WT_U	WT_D	OK	15.086	15.4753	0.036757	-0.131913	0.8513	0.950797	no
ENSMUSG00000004562.16	ENSMUSG00000004562.16	Arhgef40	chr14:51984718-52020733	WT_U	WT_D	OK	30.4727	19.7508	-0.625606	1.44455	0.0093	0.0428893	yes
ENSMUSG00000004565.14	ENSMUSG00000004565.14	Pnpla6	chr8:3515383-3544266	WT_U	WT_D	OK	6.43199	7.74301	0.267629	-1.36595	0.05165	0.165285	no
ENSMUSG00000004567.15	ENSMUSG00000004567.15	Mcoln1	chr8:3500456-3515232	WT_U	WT_D	OK	55.0617	69.6716	0.339522	-1.09046	0.11675	0.30138	no
ENSMUSG00000004568.12	ENSMUSG00000004568.12	Arhgef18	chr8:3393005-3456601	WT_U	WT_D	OK	15.0852	12.3388	-0.289932	1.54216	0.0216	0.0841516	no
ENSMUSG00000004591.16	ENSMUSG00000004591.16	Pkn2	chr3:142790901-142898582	WT_U	WT_D	OK	43.9832	40.2751	-0.127064	0.50467	0.44445	0.709657	no
ENSMUSG00000004610.4	ENSMUSG00000004610.4	Etfb	chr7:43444082-43472019	WT_U	WT_D	OK	98.8399	113.139	0.194931	-1.03711	0.1372	0.336773	no
ENSMUSG00000004626.14	ENSMUSG00000004626.14	Stxbp2	chr8:3630954-3643644	WT_U	WT_D	OK	18.585	18.2213	-0.0285128	0.0955565	0.87865	0.959485	no
ENSMUSG00000004631.15	ENSMUSG00000004631.15	Sgce	chr6:4674349-4747207	WT_U	WT_D	OK	35.912	36.5646	0.0259816	-0.143279	0.83625	0.945721	no
ENSMUSG00000004633.17	ENSMUSG00000004633.17	Chn2	chr6:54039553-54566489	WT_U	WT_D	OK	49.8045	37.9827	-0.390934	1.13887	0.08235	0.233701	no
ENSMUSG00000004637.15	ENSMUSG00000004637.15	Wwox	chr8:114439654-115352708	WT_U	WT_D	OK	9.70162	9.55366	-0.0221721	0.104875	0.87845	0.95941	no
ENSMUSG00000004642.13	ENSMUSG00000004642.13	Slbp	chr5:33634951-33678995	WT_U	WT_D	OK	62.8011	57.6658	-0.123074	0.381059	0.58325	0.818538	no
ENSMUSG00000004661.15	ENSMUSG00000004661.15	Arid3b	chr9:57777864-57836793	WT_U	WT_D	OK	3.59337	2.90365	-0.30747	1.35215	0.0494	0.159748	no
ENSMUSG00000004665.10	ENSMUSG00000004665.10	Cnn2	chr10:79988583-79996062	WT_U	WT_D	OK	53.2765	30.8372	-0.788828	4.06303	5e-05	0.00046241	yes
ENSMUSG00000004667.18	ENSMUSG00000004667.18	Polr2e	chr10:80035948-80039795	WT_U	WT_D	OK	108.466	98.6306	-0.137136	0.790237	0.25415	0.504939	no
ENSMUSG00000004677.15	ENSMUSG00000004677.15	Myo9b	chr8:71248560-71360712	WT_U	WT_D	OK	13.3458	14.539	0.123542	-0.637691	0.3656	0.633836	no
ENSMUSG00000004698.9	ENSMUSG00000004698.9	Hdac9	chr12:34371502-34528889	WT_U	WT_D	OK	7.47331	4.36152	-0.776916	3.91314	5e-05	0.00046241	yes
ENSMUSG00000004748.5	ENSMUSG00000004748.5	Mtfp1	chr11:4091479-4095445	WT_U	WT_D	OK	24.107	19.8815	-0.278026	1.20332	0.07875	0.226156	no
ENSMUSG00000004768.14	ENSMUSG00000004768.14	Rab23	chr1:33719886-33742564	WT_U	WT_D	OK	32.1671	32.046	-0.00544159	0.0158023	0.9828	0.991919	no
ENSMUSG00000004771.12	ENSMUSG00000004771.12	Rab11a	chr9:64715298-64737758	WT_U	WT_D	OK	147.449	138.194	-0.0935211	0.424836	0.54435	0.791587	no
ENSMUSG00000004788.11	ENSMUSG00000004788.11	Eif2b2	chr12:85219480-85226628	WT_U	WT_D	OK	203.785	193.49	-0.0747889	0.273579	0.6961	0.88611	no
ENSMUSG00000004789.9	ENSMUSG00000004789.9	Dlst	chr12:85110832-85134091	WT_U	WT_D	OK	72.4836	64.676	-0.164424	0.963018	0.1705	0.390626	no
ENSMUSG00000004791.6	ENSMUSG00000004791.6	Pgf	chr12:85166638-85177296	WT_U	WT_D	OK	11.3026	5.80653	-0.960907	4.66804	5e-05	0.00046241	yes
ENSMUSG00000004798.14	ENSMUSG00000004798.14	Ulk2	chr11:61775648-61855073	WT_U	WT_D	OK	3.92387	5.52389	0.493407	-2.15224	0.00115	0.00741326	yes
ENSMUSG00000004815.12	ENSMUSG00000004815.12	Dgkq	chr5:108629769-108684557	WT_U	WT_D	OK	5.7973	7.63285	0.396841	-0.937975	0.1658	0.383418	no
ENSMUSG00000004843.6	ENSMUSG00000004843.6	Chmp2b	chr16:65539132-65562697	WT_U	WT_D	OK	6.52956	6.09211	-0.100044	0.485379	0.4874	0.746542	no
ENSMUSG00000004846.10	ENSMUSG00000004846.10	Plod3	chr5:136982163-136996648	WT_U	WT_D	OK	69.6945	64.2148	-0.118139	0.447649	0.52245	0.774924	no
ENSMUSG00000004849.14	ENSMUSG00000004849.14	Ap1s1	chr5:137034992-137046135	WT_U	WT_D	OK	129.517	107.004	-0.275477	1.28803	0.0703	0.207926	no
ENSMUSG00000004865.15	ENSMUSG00000004865.15	Srpk1	chr17:28587647-28622521	WT_U	WT_D	OK	70.6058	72.8655	0.0454492	-0.172049	0.7982	0.931976	no
ENSMUSG00000004872.15	ENSMUSG00000004872.15	Pax3	chr1:78101266-78197134	WT_U	WT_D	OK	1.54306	2.25777	0.549104	-2.53734	0.00035	0.00265006	yes
ENSMUSG00000004880.11	ENSMUSG00000004880.11	Lbr	chr1:181806000-181843046	WT_U	WT_D	OK	34.8968	35.2076	0.0127921	-0.0459397	0.9308	0.975233	no
ENSMUSG00000004891.16	ENSMUSG00000004891.16	Nes	chr3:87971077-87980451	WT_U	WT_D	OK	23.4998	21.3137	-0.140867	0.78258	0.2496	0.499634	no
ENSMUSG00000004892.13	ENSMUSG00000004892.13	Bcan	chr3:87987530-88000230	WT_U	WT_D	OK	6.21448	6.03168	-0.0430738	0.179523	0.79255	0.929821	no
ENSMUSG00000004895.9	ENSMUSG00000004895.9	Prcc	chr3:87858902-87885608	WT_U	WT_D	OK	34.0156	31.3457	-0.117929	0.685425	0.3264	0.590788	no
ENSMUSG00000004896.16	ENSMUSG00000004896.16	Rrnad1	chr3:87919505-87940686	WT_U	WT_D	OK	11.8868	12.563	0.0798206	-0.191229	0.7624	0.917185	no
ENSMUSG00000004897.16	ENSMUSG00000004897.16	Hdgf	chr3:87906320-87916132	WT_U	WT_D	OK	328.264	263.899	-0.314871	1.51455	0.027	0.100407	no
ENSMUSG00000004929.12	ENSMUSG00000004929.12	Thop1	chr10:81070034-81082559	WT_U	WT_D	OK	41.5217	37.7698	-0.136632	0.718114	0.28565	0.543252	no
ENSMUSG00000004931.10	ENSMUSG00000004931.10	Apba3	chr10:81268171-81291267	WT_U	WT_D	OK	17.2185	16.9499	-0.0226827	0.11292	0.87265	0.957549	no
ENSMUSG00000004934.13	ENSMUSG00000004934.13	Pias4	chr10:81153265-81167923	WT_U	WT_D	OK	17.0761	16.615	-0.0394922	0.157202	0.82295	0.940864	no
ENSMUSG00000004936.8	ENSMUSG00000004936.8	Map2k1	chr9:64185769-64253631	WT_U	WT_D	OK	34.6933	30.4011	-0.190534	1.06354	0.11935	0.306026	no
ENSMUSG00000004937.5	ENSMUSG00000004937.5	Sgta	chr10:81044074-81060178	WT_U	WT_D	OK	64.0956	63.2708	-0.0186855	0.109262	0.87455	0.958127	no
ENSMUSG00000004945.15	ENSMUSG00000004945.15	Tmem242	chr17:5388762-5440259	WT_U	WT_D	OK	40.6354	37.3359	-0.122174	0.611727	0.3855	0.654453	no
ENSMUSG00000004947.15	ENSMUSG00000004947.15	Dtx2	chr5:135994799-136032872	WT_U	WT_D	OK	8.27659	8.86475	0.0990435	-0.462894	0.4927	0.750929	no
ENSMUSG00000004952.13	ENSMUSG00000004952.13	Rasa4	chr5:136083915-136111860	WT_U	WT_D	OK	1.04363	1.14889	0.13863	-0.387251	0.53735	0.786269	no
ENSMUSG00000004961.7	ENSMUSG00000004961.7	Syt5	chr7:4539764-4547541	WT_U	WT_D	OK	7.5285	6.46914	-0.218789	0.989756	0.1357	0.334336	no
ENSMUSG00000004980.16	ENSMUSG00000004980.16	Hnrnpa2b1	chr6:51460931-51469894	WT_U	WT_D	OK	1247.03	1122.24	-0.152115	0.719223	0.30015	0.561	no
ENSMUSG00000004994.12	ENSMUSG00000004994.12	Ccdc130	chr8:84257794-84270380	WT_U	WT_D	OK	37.053	39.7311	0.100678	-0.29094	0.6809	0.877475	no
ENSMUSG00000004996.9	ENSMUSG00000004996.9	Mri1	chr8:84249905-84257326	WT_U	WT_D	OK	8.36572	8.38605	0.00350172	-0.0131848	0.9844	0.992463	no
ENSMUSG00000005034.15	ENSMUSG00000005034.15	Prkacb	chr3:146729573-146812990	WT_U	WT_D	OK	24.4505	24.7543	0.0178152	-0.0876951	0.8891	0.962304	no
ENSMUSG00000005043.13	ENSMUSG00000005043.13	Sgsh	chr11:119307767-119355536	WT_U	WT_D	OK	6.42148	4.19602	-0.613884	1.99433	0.00515	0.0263483	yes
ENSMUSG00000005045.16	ENSMUSG00000005045.16	Chd5	chr4:152338650-152390194	WT_U	WT_D	OK	6.80723	6.16858	-0.142129	0.409125	0.302	0.563029	no
ENSMUSG00000005054.6	ENSMUSG00000005054.6	Cstb	chr10:78425669-78427619	WT_U	WT_D	OK	109.971	154.44	0.489923	-2.65956	5e-05	0.00046241	yes
ENSMUSG00000005057.13	ENSMUSG00000005057.13	Sh2b2	chr5:136218146-136246556	WT_U	WT_D	OK	10.6936	11.992	0.165325	-0.700341	0.2509	0.501265	no
ENSMUSG00000005069.12	ENSMUSG00000005069.12	Pex5	chr6:124396815-124415067	WT_U	WT_D	OK	17.4172	17.1481	-0.022464	0.0968027	0.8856	0.961403	no
ENSMUSG00000005078.16	ENSMUSG00000005078.16	Jkamp	chr12:72085588-72185029	WT_U	WT_D	OK	23.4075	23.0562	-0.0218161	0.104797	0.876	0.958636	no
ENSMUSG00000005102.13	ENSMUSG00000005102.13	Eif2ak4	chr2:118388617-118475234	WT_U	WT_D	OK	8.09281	8.56729	0.0821982	-0.335545	0.5894	0.822366	no
ENSMUSG00000005103.12	ENSMUSG00000005103.12	Wdr1	chr5:38526812-38563221	WT_U	WT_D	OK	96.3917	88.3222	-0.126133	0.594924	0.3788	0.647655	no
ENSMUSG00000005107.13	ENSMUSG00000005107.13	Slc2a9	chr5:38349272-38503143	WT_U	WT_D	OK	1.29769	1.02298	-0.343168	1.39536	0.0329	0.116911	no
ENSMUSG00000005124.9	ENSMUSG00000005124.9	Wisp1	chr15:66891319-66923201	WT_U	WT_D	OK	4.68809	5.92154	0.336972	-1.55307	0.02005	0.0794255	no
ENSMUSG00000005125.12	ENSMUSG00000005125.12	Ndrg1	chr15:66929320-67013039	WT_U	WT_D	OK	4.91158	5.16086	0.0714243	-0.308774	0.6241	0.844145	no
ENSMUSG00000005131.3	ENSMUSG00000005131.3	4930550C14Rik	chr9:53405285-53432803	WT_U	WT_D	OK	1.69083	1.628	-0.0546309	0.213517	0.76145	0.91668	no
ENSMUSG00000005142.9	ENSMUSG00000005142.9	Man2b1	chr8:85083268-85098739	WT_U	WT_D	OK	8.35876	6.11862	-0.450083	2.28224	0.00105	0.0068582	yes
ENSMUSG00000005148.7	ENSMUSG00000005148.7	Klf5	chr14:99298690-99313405	WT_U	WT_D	OK	20.1827	17.6562	-0.192944	0.977854	0.15935	0.373388	no
ENSMUSG00000005150.16	ENSMUSG00000005150.16	Wdr83	chr8:85071756-85082339	WT_U	WT_D	OK	14.8217	16.5632	0.16027	-0.429619	0.53305	0.782943	no
ENSMUSG00000005161.15	ENSMUSG00000005161.15	Prdx2	chr8:84956609-84974834	WT_U	WT_D	OK	164.524	159.299	-0.0465608	0.243811	0.72305	0.900062	no
ENSMUSG00000005198.15	ENSMUSG00000005198.15	Polr2a	chr11:69733996-69758637	WT_U	WT_D	OK	96.0573	89.4261	-0.103199	0.580067	0.3891	0.658078	no
ENSMUSG00000005202.2	ENSMUSG00000005202.2	Shbg	chr11:69614803-69617905	WT_U	WT_D	OK	5.55467	5.92831	0.0939197	-0.435748	0.53195	0.782194	no
ENSMUSG00000005204.12	ENSMUSG00000005204.12	Senp3	chr11:69673114-69682084	WT_U	WT_D	OK	34.7084	33.7312	-0.0412012	0.0784217	0.81945	0.93992	no
ENSMUSG00000005225.15	ENSMUSG00000005225.15	Plekha8	chr6:54577603-54645839	WT_U	WT_D	OK	12.9577	12.247	-0.0813813	0.361104	0.6019	0.830577	no
ENSMUSG00000005233.16	ENSMUSG00000005233.16	Spc25	chr2:69193894-69206194	WT_U	WT_D	OK	49.0264	40.9503	-0.259685	1.17459	0.08465	0.238492	no
ENSMUSG00000005262.12	ENSMUSG00000005262.12	Ufd1l	chr16:18780446-18835261	WT_U	WT_D	OK	32.0735	35.2476	0.136143	-0.474985	0.47845	0.738694	no
ENSMUSG00000005267.13	ENSMUSG00000005267.13	Zfp287	chr11:62700355-62731905	WT_U	WT_D	OK	5.0488	5.1312	0.0233557	-0.10919	0.8763	0.958745	no
ENSMUSG00000005299.6	ENSMUSG00000005299.6	Letm1	chr5:33739672-33782817	WT_U	WT_D	OK	21.0344	18.7275	-0.167592	0.545448	0.42	0.687781	no
ENSMUSG00000005312.14	ENSMUSG00000005312.14	Ubqln1	chr13:58176155-58215653	WT_U	WT_D	OK	79.5761	76.8459	-0.0503669	0.293203	0.6754	0.874255	no
ENSMUSG00000005354.15	ENSMUSG00000005354.15	Txn2	chr15:77915046-77929006	WT_U	WT_D	OK	189.364	171.536	-0.142651	0.752872	0.24385	0.492353	no
ENSMUSG00000005362.14	ENSMUSG00000005362.14	Crbn	chr6:106769119-106800077	WT_U	WT_D	OK	15.451	15.8722	0.0388019	-0.104539	0.8758	0.958606	no
ENSMUSG00000005370.3	ENSMUSG00000005370.3	Msh6	chr17:87975049-88065291	WT_U	WT_D	OK	22.3685	21.9173	-0.0293984	0.114625	0.87305	0.957549	no
ENSMUSG00000005371.14	ENSMUSG00000005371.14	Fbxo11	chr17:87975049-88065291	WT_U	WT_D	OK	35.6053	36.0124	0.0164017	-0.0612982	0.93045	0.975131	no
ENSMUSG00000005374.13	ENSMUSG00000005374.13	Tbl2	chr5:135149656-135165760	WT_U	WT_D	OK	17.1427	14.3614	-0.255398	0.801937	0.20985	0.448687	no
ENSMUSG00000005378.17	ENSMUSG00000005378.17	Wbscr22	chr5:135052956-135065862	WT_U	WT_D	OK	52.9981	50.0035	-0.0839116	0.196931	0.7634	0.917749	no
ENSMUSG00000005397.7	ENSMUSG00000005397.7	Nid1	chr13:13437601-13512275	WT_U	WT_D	OK	1.83851	1.07552	-0.773503	3.68681	5e-05	0.00046241	yes
ENSMUSG00000005410.5	ENSMUSG00000005410.5	Mcm5	chr8:75109527-75128439	WT_U	WT_D	OK	48.2116	47.371	-0.0253762	0.148604	0.83055	0.94377	no
ENSMUSG00000005413.7	ENSMUSG00000005413.7	Hmox1	chr8:75093590-75100596	WT_U	WT_D	OK	46.7025	60.5719	0.375149	-2.17251	0.0018	0.0108711	yes
ENSMUSG00000005417.17	ENSMUSG00000005417.17	Mprip	chr11:59661304-59780860	WT_U	WT_D	OK	70.3502	70.1816	-0.00346169	0.0172336	0.97985	0.990827	no
ENSMUSG00000005442.13	ENSMUSG00000005442.13	Cic	chr7:25267703-25294159	WT_U	WT_D	OK	32.0305	35.169	0.134858	-0.306553	0.55425	0.799141	no
ENSMUSG00000005447.12	ENSMUSG00000005447.12	Pafah1b3	chr7:25295048-25297986	WT_U	WT_D	OK	38.9087	38.0632	-0.0316959	0.158987	0.8227	0.94074	no
ENSMUSG00000005465.8	ENSMUSG00000005465.8	Il27ra	chr8:84021470-84042575	WT_U	WT_D	OK	2.27397	1.43702	-0.662133	2.945	5e-05	0.00046241	yes
ENSMUSG00000005469.9	ENSMUSG00000005469.9	Prkaca	chr8:83972977-83996445	WT_U	WT_D	OK	79.2626	65.0658	-0.284741	1.6675	0.01775	0.072169	no
ENSMUSG00000005470.8	ENSMUSG00000005470.8	Asf1b	chr8:83955506-83970197	WT_U	WT_D	OK	65.546	53.1874	-0.301423	1.08011	0.11945	0.306181	no
ENSMUSG00000005481.17	ENSMUSG00000005481.17	Ddx39	chr8:83715176-83741326	WT_U	WT_D	OK	79.5485	67.3989	-0.23911	1.36425	0.05225	0.166758	no
ENSMUSG00000005483.9	ENSMUSG00000005483.9	Dnajb1	chr8:83608174-83611902	WT_U	WT_D	OK	32.9112	36.7721	0.160033	-0.931907	0.1881	0.417424	no
ENSMUSG00000005501.14	ENSMUSG00000005501.14	Usp40	chr1:87853286-88008551	WT_U	WT_D	OK	3.95476	4.6169	0.223334	-0.419984	0.49735	0.75471	no
ENSMUSG00000005505.12	ENSMUSG00000005505.12	Kbtbd4	chr2:90894633-90918258	WT_U	WT_D	OK	7.50565	7.8177	0.0587672	-0.117803	0.83555	0.945485	no
ENSMUSG00000005506.16	ENSMUSG00000005506.16	Celf1	chr2:90940381-91019497	WT_U	WT_D	OK	64.1607	62.0699	-0.0477961	0.201598	0.7054	0.891455	no
ENSMUSG00000005510.9	ENSMUSG00000005510.9	Ndufs3	chr2:90894633-90918258	WT_U	WT_D	OK	64.2283	60.7889	-0.0794012	0.341664	0.6261	0.8454	no
ENSMUSG00000005514.14	ENSMUSG00000005514.14	Por	chr5:135653809-135735326	WT_U	WT_D	OK	80.6261	90.9224	0.173389	-0.774035	0.26245	0.515308	no
ENSMUSG00000005533.9	ENSMUSG00000005533.9	Igf1r	chr7:67952858-68226780	WT_U	WT_D	OK	9.50314	7.83366	-0.278718	1.42104	0.0431	0.14411	no
ENSMUSG00000005534.9	ENSMUSG00000005534.9	Insr	chr8:3150921-3279617	WT_U	WT_D	OK	9.85103	10.7498	0.125963	-0.72882	0.29585	0.555637	no
ENSMUSG00000005566.13	ENSMUSG00000005566.13	Trim28	chr7:13024151-13031035	WT_U	WT_D	OK	150.969	157.872	0.064503	-0.292283	0.64305	0.855704	no
ENSMUSG00000005575.15	ENSMUSG00000005575.15	Ube2m	chr7:13035119-13038275	WT_U	WT_D	OK	104.26	102.639	-0.0226067	0.112644	0.8717	0.957381	no
ENSMUSG00000005580.11	ENSMUSG00000005580.11	Adcy9	chr16:4287528-4420498	WT_U	WT_D	OK	1.59279	1.96884	0.30579	-1.44398	0.0397	0.135104	no
ENSMUSG00000005609.15	ENSMUSG00000005609.15	Ctr9	chr7:111028950-111056377	WT_U	WT_D	OK	26.2348	27.3889	0.0621095	-0.320251	0.60545	0.833055	no
ENSMUSG00000005610.16	ENSMUSG00000005610.16	Eif4g2	chr7:111070567-111083030	WT_U	WT_D	OK	506.2	523.22	0.0477102	-0.140746	0.80515	0.934482	no
ENSMUSG00000005611.15	ENSMUSG00000005611.15	Mrvi1	chr7:110868265-110982461	WT_U	WT_D	OK	4.45127	2.19494	-1.02004	2.26549	0.00075	0.0051382	yes
ENSMUSG00000005615.14	ENSMUSG00000005615.14	Pcyt1a	chr16:32430920-32475070	WT_U	WT_D	OK	15.1529	15.3609	0.0196688	-0.0625653	0.9183	0.97138	no
ENSMUSG00000005621.11	ENSMUSG00000005621.11	Zfp592	chr7:80993680-81045164	WT_U	WT_D	OK	6.98807	6.93165	-0.0116952	0.0293623	0.96465	0.985924	no
ENSMUSG00000005625.15	ENSMUSG00000005625.15	Psmd4	chr3:95032693-95042614	WT_U	WT_D	OK	119.063	124.402	0.0632845	-0.357934	0.6033	0.831467	no
ENSMUSG00000005656.8	ENSMUSG00000005656.8	Snx6	chr12:54746348-54795703	WT_U	WT_D	OK	50.6247	48.1075	-0.0735796	0.429553	0.54165	0.789575	no
ENSMUSG00000005667.8	ENSMUSG00000005667.8	Mthfd2	chr6:83305690-83325908	WT_U	WT_D	OK	162.032	174.313	0.105401	-0.581523	0.3863	0.655223	no
ENSMUSG00000005674.9	ENSMUSG00000005674.9	Tomm40l	chr1:171213969-171222514	WT_U	WT_D	OK	15.0661	15.1139	0.00456997	-0.0145815	0.98455	0.992504	no
ENSMUSG00000005682.8	ENSMUSG00000005682.8	Pan2	chr10:128303334-128321358	WT_U	WT_D	OK	15.4582	17.441	0.17411	-1.0142	0.15185	0.361409	no
ENSMUSG00000005683.7	ENSMUSG00000005683.7	Cs	chr10:128337831-128362479	WT_U	WT_D	OK	173.004	163.998	-0.0771272	0.448626	0.5159	0.769881	no
ENSMUSG00000005686.16	ENSMUSG00000005686.16	Ampd3	chr7:110768205-110844457	WT_U	WT_D	OK	18.6164	12.3129	-0.596404	1.51694	0.01665	0.0686154	no
ENSMUSG00000005687.14	ENSMUSG00000005687.14	Bcas2	chr3:103171654-103179166	WT_U	WT_D	OK	84.6574	77.6681	-0.124314	0.674434	0.3321	0.597639	no
ENSMUSG00000005698.15	ENSMUSG00000005698.15	Ctcf	chr8:105566323-105682922	WT_U	WT_D	OK	79.51	76.669	-0.052493	0.149868	0.8285	0.943227	no
ENSMUSG00000005699.15	ENSMUSG00000005699.15	Pard6a	chr8:105701153-105703493	WT_U	WT_D	OK	9.7679	12.7167	0.380604	-1.87274	0.0067	0.0327802	yes
ENSMUSG00000005718.7	ENSMUSG00000005718.7	Tfap4	chr16:4544660-4559720	WT_U	WT_D	OK	6.54518	7.53811	0.20377	-1.00394	0.15285	0.363013	no
ENSMUSG00000005732.14	ENSMUSG00000005732.14	Ranbp1	chr16:18239783-18289249	WT_U	WT_D	OK	622.904	565.508	-0.139462	0.722552	0.2966	0.556451	no
ENSMUSG00000005774.12	ENSMUSG00000005774.12	Rfx5	chr3:94954074-94962048	WT_U	WT_D	OK	6.15233	6.45699	0.0697289	-0.231469	0.7031	0.890372	no
ENSMUSG00000005779.12	ENSMUSG00000005779.12	Psmb4	chr3:94884092-94886961	WT_U	WT_D	OK	112.848	115.256	0.030461	-0.171038	0.79835	0.932021	no
ENSMUSG00000005802.12	ENSMUSG00000005802.12	Slc30a4	chr2:122681232-122721456	WT_U	WT_D	OK	10.5043	11.9251	0.183021	-1.01093	0.14615	0.352007	no
ENSMUSG00000005804.14	ENSMUSG00000005804.14	Bloc1s6	chr2:122738502-122749475	WT_U	WT_D	OK	25.1636	27.6746	0.137224	-0.389326	0.5563	0.800633	no
ENSMUSG00000005813.12	ENSMUSG00000005813.12	Metap1	chr3:138458955-138489515	WT_U	WT_D	OK	37.7871	39.3725	0.0592945	-0.296318	0.6653	0.869222	no
ENSMUSG00000005823.8	ENSMUSG00000005823.8	Gpr108	chr17:57234913-57247641	WT_U	WT_D	OK	6.98886	8.67535	0.311865	-1.54349	0.02895	0.105871	no
ENSMUSG00000005846.11	ENSMUSG00000005846.11	Rsl1d1	chr16:11192969-11203331	WT_U	WT_D	OK	139.281	144.941	0.0574673	-0.320946	0.6434	0.855905	no
ENSMUSG00000005871.14	ENSMUSG00000005871.14	Apc	chr18:34207774-34322189	WT_U	WT_D	OK	18.1956	18.8966	0.0545371	-0.178989	0.7115	0.894419	no
ENSMUSG00000005873.5	ENSMUSG00000005873.5	Reep5	chr18:34344888-34373415	WT_U	WT_D	OK	25.1138	23.2451	-0.111554	0.6492	0.3533	0.620391	no
ENSMUSG00000005881.13	ENSMUSG00000005881.13	Ergic3	chr2:156008044-156018279	WT_U	WT_D	OK	38.2566	39.203	0.0352554	-0.161951	0.8141	0.937787	no
ENSMUSG00000005882.18	ENSMUSG00000005882.18	Uqcc1	chr2:155846893-155930310	WT_U	WT_D	OK	55.5904	55.471	-0.00310203	0.0116733	0.98635	0.993389	no
ENSMUSG00000005886.14	ENSMUSG00000005886.14	Ncoa2	chr1:13139104-13374083	WT_U	WT_D	OK	17.2564	19.1696	0.151689	-0.356574	0.5617	0.804545	no
ENSMUSG00000005893.14	ENSMUSG00000005893.14	Nr2c2	chr6:92091389-92184033	WT_U	WT_D	OK	15.378	15.7859	0.0377686	-0.127014	0.8098	0.936171	no
ENSMUSG00000005897.14	ENSMUSG00000005897.14	Nr2c1	chr10:94148022-94197211	WT_U	WT_D	OK	5.48466	6.15028	0.16525	-0.801099	0.2558	0.507081	no
ENSMUSG00000005899.12	ENSMUSG00000005899.12	Smpd4	chr16:17619353-17644828	WT_U	WT_D	OK	27.7169	26.8864	-0.0438893	0.15263	0.81425	0.937885	no
ENSMUSG00000005907.14	ENSMUSG00000005907.14	Pex1	chr5:3571565-3680325	WT_U	WT_D	OK	12.1871	12.2507	0.00750932	-0.0127159	0.98395	0.992279	no
ENSMUSG00000005917.15	ENSMUSG00000005917.15	Otx1	chr11:21994763-22002897	WT_U	WT_D	OK	5.32574	6.39867	0.26479	-1.28093	0.0648	0.195768	no
ENSMUSG00000005936.18	ENSMUSG00000005936.18	Kctd20	chr17:28951949-28969549	WT_U	WT_D	OK	36.6584	38.297	0.0630876	-0.279208	0.6772	0.875296	no
ENSMUSG00000005949.9	ENSMUSG00000005949.9	Ctns	chr11:73183595-73199042	WT_U	WT_D	OK	2.72872	4.34385	0.67075	-2.72159	0.0002	0.00162246	yes
ENSMUSG00000005968.14	ENSMUSG00000005968.14	Tuft1	chr3:94612756-94658872	WT_U	WT_D	OK	3.26638	2.31753	-0.495105	1.88724	0.00435	0.0228744	yes
ENSMUSG00000005973.6	ENSMUSG00000005973.6	Rcn1	chr2:105386290-105399319	WT_U	WT_D	OK	38.8936	34.599	-0.168802	0.986046	0.1514	0.36069	no
ENSMUSG00000005981.11	ENSMUSG00000005981.11	Trap1	chr16:4032838-4077827	WT_U	WT_D	OK	60.5488	61.0967	0.0129961	-0.0755681	0.9116	0.969163	no
ENSMUSG00000005982.13	ENSMUSG00000005982.13	Naa60	chr16:3847267-3941147	WT_U	WT_D	OK	27.6015	22.9176	-0.268291	0.72304	0.21665	0.457853	no
ENSMUSG00000005983.15	ENSMUSG00000005983.15	1700037C18Rik	chr16:3847267-3941147	WT_U	WT_D	OK	2.06041	2.03352	-0.0189523	0.0153431	0.97925	0.99063	no
ENSMUSG00000005986.15	ENSMUSG00000005986.15	Ankrd13d	chr19:4270179-4283137	WT_U	WT_D	OK	1.429	1.23101	-0.215163	0.789242	0.23875	0.486043	no
ENSMUSG00000006005.17	ENSMUSG00000006005.17	Tpr	chr1:150361304-150466165	WT_U	WT_D	OK	110.055	101.806	-0.112402	0.315467	0.6201	0.841803	no
ENSMUSG00000006010.14	ENSMUSG00000006010.14	BC003331	chr1:150361304-150466165	WT_U	WT_D	OK	29.0387	29.2361	0.009774	-0.0128097	0.9838	0.992227	no
ENSMUSG00000006019.15	ENSMUSG00000006019.15	Dhx34	chr7:16197146-16222037	WT_U	WT_D	OK	2.44895	2.66096	0.119784	-0.552136	0.4228	0.690651	no
ENSMUSG00000006021.5	ENSMUSG00000006021.5	Kptn	chr7:16119894-16127516	WT_U	WT_D	OK	5.03286	5.75964	0.1946	-0.751639	0.27175	0.526613	no
ENSMUSG00000006024.12	ENSMUSG00000006024.12	Napa	chr7:16098457-16117975	WT_U	WT_D	OK	23.2984	24.7592	0.0877338	-0.292957	0.67085	0.871993	no
ENSMUSG00000006050.11	ENSMUSG00000006050.11	Sra1	chr18:36666680-36683861	WT_U	WT_D	OK	53.9763	53.0604	-0.0246905	0.0883527	0.9003	0.965591	no
ENSMUSG00000006057.15	ENSMUSG00000006057.15	Atp5g1	chr11:96068851-96075670	WT_U	WT_D	OK	120.31	118.415	-0.0229047	0.113348	0.8763	0.958745	no
ENSMUSG00000006058.10	ENSMUSG00000006058.10	Snf8	chr11:96034884-96047430	WT_U	WT_D	OK	77.1601	74.3815	-0.0529112	0.30344	0.66545	0.869293	no
ENSMUSG00000006095.12	ENSMUSG00000006095.12	Tbcb	chr7:30224130-30233390	WT_U	WT_D	OK	64.4374	64.6765	0.00534333	-0.0214316	0.97575	0.989127	no
ENSMUSG00000006127.9	ENSMUSG00000006127.9	Inpp5k	chr11:75630987-75648871	WT_U	WT_D	OK	3.93181	4.01673	0.0308279	-0.110224	0.8755	0.958518	no
ENSMUSG00000006134.3	ENSMUSG00000006134.3	Crkl	chr16:17451986-17486255	WT_U	WT_D	OK	17.6396	18.4029	0.0611153	-0.355748	0.61555	0.839367	no
ENSMUSG00000006169.19	ENSMUSG00000006169.19	Clint1	chr11:45852050-45910625	WT_U	WT_D	OK	47.5452	47.6243	0.00239819	-0.0139169	0.98635	0.993389	no
ENSMUSG00000006191.17	ENSMUSG00000006191.17	Cdkal1	chr13:29191745-29855674	WT_U	WT_D	OK	9.91438	9.80427	-0.0161123	0.0572545	0.934	0.976319	no
ENSMUSG00000006215.12	ENSMUSG00000006215.12	Zbtb17	chr4:141444653-141538597	WT_U	WT_D	OK	17.5855	16.5603	-0.0866575	0.155878	0.80185	0.933229	no
ENSMUSG00000006219.12	ENSMUSG00000006219.12	Fblim1	chr4:141576061-141606096	WT_U	WT_D	OK	2.79847	1.67712	-0.738652	2.6181	5e-05	0.00046241	yes
ENSMUSG00000006235.5	ENSMUSG00000006235.5	Epor	chr9:21958898-21963576	WT_U	WT_D	OK	1.89892	1.01919	-0.897756	3.66461	5e-05	0.00046241	yes
ENSMUSG00000006241.15	ENSMUSG00000006241.15	Ccdc159	chr9:21921009-21935872	WT_U	WT_D	OK	1.27234	1.93425	0.60429	-1.49554	0.03405	0.120023	no
ENSMUSG00000006262.15	ENSMUSG00000006262.15	Mob1b	chr5:88720854-88764220	WT_U	WT_D	OK	17.7412	16.4487	-0.10913	0.505823	0.45065	0.71544	no
ENSMUSG00000006270.7	ENSMUSG00000006270.7	Vax1	chr19:59166186-59170056	WT_U	WT_D	OK	7.33215	6.14532	-0.254748	1.16501	0.09205	0.253336	no
ENSMUSG00000006273.14	ENSMUSG00000006273.14	Atp6v1b2	chr8:69037710-69113711	WT_U	WT_D	OK	59.7021	63.6143	0.0915694	-0.465122	0.45615	0.72028	no
ENSMUSG00000006276.9	ENSMUSG00000006276.9	Eps15l1	chr8:72341000-72421474	WT_U	WT_D	OK	19.4317	22.0534	0.182589	-1.06157	0.1277	0.320674	no
ENSMUSG00000006281.7	ENSMUSG00000006281.7	Tep1	chr14:50824061-50879003	WT_U	WT_D	OK	2.42575	2.35111	-0.0450888	0.217551	0.75555	0.91439	no
ENSMUSG00000006288.7	ENSMUSG00000006288.7	Ttc5	chr14:50765414-50785518	WT_U	WT_D	OK	13.6704	14.3485	0.0698445	-0.351456	0.61865	0.840837	no
ENSMUSG00000006289.14	ENSMUSG00000006289.14	Osgep	chr14:50906477-50924893	WT_U	WT_D	OK	42.9506	42.965	0.00048361	-0.00213825	0.9969	0.998315	no
ENSMUSG00000006299.13	ENSMUSG00000006299.13	Aamp	chr1:74279839-74284738	WT_U	WT_D	OK	137.741	134.829	-0.0308272	0.171932	0.8026	0.933466	no
ENSMUSG00000006301.17	ENSMUSG00000006301.17	Tmbim1	chr1:74284929-74353694	WT_U	WT_D	OK	14.5033	12.8571	-0.173816	0.337337	0.61835	0.840668	no
ENSMUSG00000006304.14	ENSMUSG00000006304.14	Arpc2	chr1:74236083-74268209	WT_U	WT_D	OK	482.126	375.447	-0.360801	2.09134	0.0026	0.0148564	yes
ENSMUSG00000006307.16	ENSMUSG00000006307.16	Kmt2b	chr7:30568857-30588726	WT_U	WT_D	OK	27.4271	26.6764	-0.0400381	0.0994145	0.88095	0.960008	no
ENSMUSG00000006311.8	ENSMUSG00000006311.8	Etv2	chr7:30633615-30635852	WT_U	WT_D	OK	2.21564	1.87396	-0.241633	0.944505	0.1763	0.399547	no
ENSMUSG00000006315.8	ENSMUSG00000006315.8	Tmem147	chr7:30727700-30729534	WT_U	WT_D	OK	38.1833	44.3285	0.215293	-1.08948	0.12135	0.309751	no
ENSMUSG00000006333.14	ENSMUSG00000006333.14	Rps9	chr7:3703992-3706897	WT_U	WT_D	OK	1275.92	1388.03	0.121501	-0.666783	0.33835	0.604457	no
ENSMUSG00000006335.16	ENSMUSG00000006335.16	Tfpt	chr7:3617372-3629929	WT_U	WT_D	OK	16.3435	16.5401	0.017251	-0.0550392	0.93795	0.97745	no
ENSMUSG00000006356.10	ENSMUSG00000006356.10	Crip2	chr12:113140235-113145506	WT_U	WT_D	OK	125.193	79.0683	-0.662983	3.60272	5e-05	0.00046241	yes
ENSMUSG00000006360.11	ENSMUSG00000006360.11	Crip1	chr12:113146315-113153879	WT_U	WT_D	OK	112.455	53.4862	-1.07211	5.27096	5e-05	0.00046241	yes
ENSMUSG00000006369.14	ENSMUSG00000006369.14	Fbln1	chr15:85205948-85286535	WT_U	WT_D	OK	154.428	113.989	-0.43804	2.49782	0.0005	0.00361297	yes
ENSMUSG00000006373.10	ENSMUSG00000006373.10	Pgrmc1	chrX:36598205-36606079	WT_U	WT_D	OK	23.6621	28.9268	0.289829	-1.48193	0.0348	0.122116	no
ENSMUSG00000006378.13	ENSMUSG00000006378.13	Gcat	chr15:79030873-79043558	WT_U	WT_D	OK	14.0046	16.2512	0.214645	-1.06771	0.1262	0.318087	no
ENSMUSG00000006390.15	ENSMUSG00000006390.15	Elovl1	chr4:118428092-118437352	WT_U	WT_D	OK	30.2255	29.7572	-0.0225274	0.0787743	0.91345	0.969699	no
ENSMUSG00000006392.16	ENSMUSG00000006392.16	Med8	chr4:118409336-118415782	WT_U	WT_D	OK	41.4213	44.701	0.109934	-0.538992	0.43985	0.705629	no
ENSMUSG00000006395.16	ENSMUSG00000006395.16	Hyi	chr4:118359989-118409273	WT_U	WT_D	OK	5.96216	7.81593	0.390582	-0.77581	0.2715	0.526363	no
ENSMUSG00000006398.15	ENSMUSG00000006398.15	Cdc20	chr4:118428092-118437352	WT_U	WT_D	OK	32.7904	31.4338	-0.0609568	0.266344	0.6852	0.879836	no
ENSMUSG00000006403.12	ENSMUSG00000006403.12	Adamts4	chr1:171234852-171260637	WT_U	WT_D	OK	9.85861	8.14434	-0.275586	0.699461	0.3169	0.579825	no
ENSMUSG00000006412.10	ENSMUSG00000006412.10	Pfdn2	chr1:171345669-171360798	WT_U	WT_D	OK	195.588	175.165	-0.159103	0.757379	0.2773	0.533191	no
ENSMUSG00000006418.17	ENSMUSG00000006418.17	Rnf114	chr2:167481132-167516173	WT_U	WT_D	OK	25.4332	31.4087	0.304451	-1.40799	0.0455	0.150076	no
ENSMUSG00000006423.15	ENSMUSG00000006423.15	C330007P06Rik	chrX:36823736-36884222	WT_U	WT_D	OK	8.85761	7.90438	-0.164265	0.588978	0.35005	0.617074	no
ENSMUSG00000006435.15	ENSMUSG00000006435.15	Neurl1a	chr19:47178819-47259440	WT_U	WT_D	OK	7.55111	8.57467	0.183392	-0.935721	0.1839	0.411246	no
ENSMUSG00000006442.10	ENSMUSG00000006442.10	Srm	chr4:148591502-148594993	WT_U	WT_D	OK	224.14	230.119	0.03798	-0.218569	0.7477	0.910841	no
ENSMUSG00000006456.10	ENSMUSG00000006456.10	Rbm14	chr19:4711207-4811634	WT_U	WT_D	OK	26.1546	23.9752	-0.125522	0.582755	0.4078	0.676404	no
ENSMUSG00000006463.13	ENSMUSG00000006463.13	Zdhhc24	chr19:4878667-4885397	WT_U	WT_D	OK	6.83531	7.8088	0.192094	-0.871383	0.21915	0.461355	no
ENSMUSG00000006464.8	ENSMUSG00000006464.8	Bbs1	chr19:4886897-4906627	WT_U	WT_D	OK	1.57611	1.8578	0.237227	-1.14149	0.1015	0.271963	no
ENSMUSG00000006471.17	ENSMUSG00000006471.17	Ndor1	chr2:25244820-25256292	WT_U	WT_D	OK	14.0906	15.7043	0.156427	-0.400044	0.54955	0.795627	no
ENSMUSG00000006476.19	ENSMUSG00000006476.19	Nsmf	chr2:25054354-25062881	WT_U	WT_D	OK	17.8968	19.1024	0.0940523	-0.282277	0.68635	0.880523	no
ENSMUSG00000006494.11	ENSMUSG00000006494.11	Pdk1	chr2:71873223-71903858	WT_U	WT_D	OK	3.18597	0.555309	-2.52037	6.13497	5e-05	0.00046241	yes
ENSMUSG00000006498.16	ENSMUSG00000006498.16	Ptbp1	chr10:79851380-79883174	WT_U	WT_D	OK	253.468	246.735	-0.0388412	0.156544	0.78455	0.926767	no
ENSMUSG00000006526.11	ENSMUSG00000006526.11	Tmem110	chr14:30825589-30876986	WT_U	WT_D	OK	6.86821	6.6788	-0.0403452	0.14178	0.8394	0.946835	no
ENSMUSG00000006527.14	ENSMUSG00000006527.14	Sfmbt1	chr14:30714848-30822713	WT_U	WT_D	OK	4.18034	5.03379	0.268025	-1.1903	0.08715	0.243468	no
ENSMUSG00000006575.14	ENSMUSG00000006575.14	Rundc3a	chr11:102393402-102402555	WT_U	WT_D	OK	161.42	150.353	-0.102466	0.360421	0.5966	0.827228	no
ENSMUSG00000006576.16	ENSMUSG00000006576.16	Slc4a3	chr1:75546265-75562172	WT_U	WT_D	OK	8.95852	10.4101	0.216652	-0.550486	0.40315	0.672096	no
ENSMUSG00000006599.13	ENSMUSG00000006599.13	Gtf2h1	chr7:46796102-46823800	WT_U	WT_D	OK	28.6902	31.2626	0.12388	-0.547714	0.436	0.702275	no
ENSMUSG00000006611.14	ENSMUSG00000006611.14	Hfe	chr13:23702033-23710854	WT_U	WT_D	OK	1.39298	2.29787	0.722123	-3.03863	5e-05	0.00046241	yes
ENSMUSG00000006638.14	ENSMUSG00000006638.14	Abhd1	chr5:30950065-30960361	WT_U	WT_D	OK	6.17865	6.03615	-0.033663	0.0510118	0.93665	0.977123	no
ENSMUSG00000006641.12	ENSMUSG00000006641.12	Slc5a6	chr5:31036035-31054623	WT_U	WT_D	OK	8.56232	7.49034	-0.192971	0.405125	0.5634	0.805863	no
ENSMUSG00000006651.7	ENSMUSG00000006651.7	Aplp1	chr7:30434980-30445582	WT_U	WT_D	OK	31.143	35.6846	0.196394	-1.14462	0.1046	0.277914	no
ENSMUSG00000006673.14	ENSMUSG00000006673.14	Qrich1	chr9:108516805-108560163	WT_U	WT_D	OK	45.3449	44.7353	-0.0195266	0.0721059	0.9142	0.969828	no
ENSMUSG00000006675.10	ENSMUSG00000006675.10	P4htm	chr9:108578861-108597667	WT_U	WT_D	OK	4.74178	5.33202	0.169253	-0.725399	0.29105	0.549952	no
ENSMUSG00000006676.16	ENSMUSG00000006676.16	Usp19	chr9:108490601-108502337	WT_U	WT_D	OK	26.4746	25.8498	-0.0344558	0.127163	0.84095	0.947348	no
ENSMUSG00000006678.6	ENSMUSG00000006678.6	Pola1	chrX:93304766-93632155	WT_U	WT_D	OK	14.7537	14.6832	-0.00691039	0.0370149	0.9539	0.982312	no
ENSMUSG00000006699.17	ENSMUSG00000006699.17	Cdc42	chr4:137319695-137357720	WT_U	WT_D	OK	261.183	229.042	-0.189449	1.09826	0.11685	0.301529	no
ENSMUSG00000006705.12	ENSMUSG00000006705.12	Pknox1	chr17:31564748-31607684	WT_U	WT_D	OK	8.07963	8.39907	0.0559404	-0.25216	0.69305	0.884678	no
ENSMUSG00000006715.11	ENSMUSG00000006715.11	Gmnn	chr13:24751844-24761923	WT_U	WT_D	OK	51.6089	45.8935	-0.16933	0.861104	0.2213	0.464107	no
ENSMUSG00000006717.6	ENSMUSG00000006717.6	Acot13	chr13:24817947-24831517	WT_U	WT_D	OK	26.5469	22.3595	-0.247655	1.21556	0.08135	0.231651	no
ENSMUSG00000006720.16	ENSMUSG00000006720.16	Zfp184	chr13:21940373-21960779	WT_U	WT_D	OK	4.30013	5.44367	0.340199	-1.49233	0.0286	0.104939	no
ENSMUSG00000006724.12	ENSMUSG00000006724.12	Cyp27b1	chr10:127048249-127053006	WT_U	WT_D	OK	1.04252	1.24915	0.260872	-1.03601	0.1244	0.315096	no
ENSMUSG00000006728.12	ENSMUSG00000006728.12	Cdk4	chr10:127063533-127070261	WT_U	WT_D	OK	487.297	569.216	0.224175	-0.947232	0.17035	0.390345	no
ENSMUSG00000006731.9	ENSMUSG00000006731.9	B4galnt1	chr10:127165155-127172340	WT_U	WT_D	OK	8.36895	13.0487	0.640788	-3.22826	5e-05	0.00046241	yes
ENSMUSG00000006732.14	ENSMUSG00000006732.14	Mettl1	chr10:127031003-127046365	WT_U	WT_D	OK	36.6145	37.0452	0.0168715	-0.0810022	0.9049	0.967099	no
ENSMUSG00000006736.8	ENSMUSG00000006736.8	Tspan31	chr10:127063533-127070261	WT_U	WT_D	OK	72.6215	78.4154	0.11074	-0.285863	0.68775	0.88136	no
ENSMUSG00000006740.13	ENSMUSG00000006740.13	Kif5b	chr18:6201001-6242174	WT_U	WT_D	OK	64.8467	60.5401	-0.0991421	0.466972	0.46405	0.726651	no
ENSMUSG00000006763.12	ENSMUSG00000006763.12	Saal1	chr7:46686107-46710680	WT_U	WT_D	OK	13.2255	10.4709	-0.336937	1.54766	0.0225	0.0869279	no
ENSMUSG00000006764.8	ENSMUSG00000006764.8	Tph2	chr10:115078640-115185022	WT_U	WT_D	OK	5.33244	4.6633	-0.193445	0.946862	0.1732	0.394925	no
ENSMUSG00000006782.16	ENSMUSG00000006782.16	Cnp	chr11:100574903-100704271	WT_U	WT_D	OK	7.43624	5.24766	-0.502899	0.556467	0.409	0.677519	no
ENSMUSG00000006818.4	ENSMUSG00000006818.4	Sod2	chr17:13007838-13018119	WT_U	WT_D	OK	21.7167	20.5755	-0.0778774	0.454133	0.5188	0.772162	no
ENSMUSG00000006850.7	ENSMUSG00000006850.7	Tmco6	chr18:36735067-36744557	WT_U	WT_D	OK	5.43516	5.37211	-0.0168337	0.0431599	0.9519	0.981796	no
ENSMUSG00000006906.10	ENSMUSG00000006906.10	Stambp	chr6:83543210-83588123	WT_U	WT_D	OK	13.6934	15.0494	0.136225	-0.60507	0.3689	0.637341	no
ENSMUSG00000006920.14	ENSMUSG00000006920.14	Ezh1	chr11:101191114-101226463	WT_U	WT_D	OK	8.56012	8.09944	-0.0798089	0.270369	0.68565	0.880031	no
ENSMUSG00000006930.15	ENSMUSG00000006930.15	Hap1	chr11:100347326-100356128	WT_U	WT_D	OK	130.811	143.1	0.12954	-0.539667	0.43115	0.697907	no
ENSMUSG00000006931.15	ENSMUSG00000006931.15	P3h4	chr11:100408455-100414836	WT_U	WT_D	OK	12.8076	10.7085	-0.258244	0.930374	0.1072	0.28317	no
ENSMUSG00000006932.16	ENSMUSG00000006932.16	Ctnnb1	chr9:120924454-121277197	WT_U	WT_D	OK	120.228	103.074	-0.222092	1.22658	0.0638	0.193546	no
ENSMUSG00000006941.4	ENSMUSG00000006941.4	Eif1b	chr9:120492605-120495327	WT_U	WT_D	OK	39.3515	34.5823	-0.186385	0.942058	0.18035	0.40577	no
ENSMUSG00000006998.15	ENSMUSG00000006998.15	Psmd2	chr16:20651651-20663414	WT_U	WT_D	OK	143.142	131.256	-0.125064	0.706399	0.2921	0.551084	no
ENSMUSG00000007021.4	ENSMUSG00000007021.4	Syngr3	chr17:24685091-24689955	WT_U	WT_D	OK	14.0402	14.989	0.0943406	-0.476388	0.4996	0.75644	no
ENSMUSG00000007029.16	ENSMUSG00000007029.16	Vars	chr17:35000986-35016322	WT_U	WT_D	OK	118.892	123.833	0.0587442	-0.219256	0.72055	0.898984	no
ENSMUSG00000007035.15	ENSMUSG00000007035.15	Msh5	chr17:35028604-35046745	WT_U	WT_D	OK	1.54962	1.32479	-0.226151	0.685411	0.2957	0.555428	no
ENSMUSG00000007036.15	ENSMUSG00000007036.15	Abhd16a	chr17:35089262-35102987	WT_U	WT_D	OK	22.9568	25.7327	0.164681	-0.546319	0.42995	0.696967	no
ENSMUSG00000007038.5	ENSMUSG00000007038.5	Neu1	chr17:34931252-34935953	WT_U	WT_D	OK	10.2974	12.9902	0.335144	-1.25733	0.06475	0.195664	no
ENSMUSG00000007039.12	ENSMUSG00000007039.12	Ddah2	chr17:35059034-35062095	WT_U	WT_D	OK	92.5086	89.9714	-0.040121	0.211693	0.7635	0.917775	no
ENSMUSG00000007041.9	ENSMUSG00000007041.9	Clic1	chr17:35049965-35058749	WT_U	WT_D	OK	147.424	159.954	0.117686	-0.687143	0.3269	0.591372	no
ENSMUSG00000007050.17	ENSMUSG00000007050.17	Lsm2	chr17:34981861-34985891	WT_U	WT_D	OK	76.2858	72.8414	-0.0666559	0.27426	0.695	0.885554	no
ENSMUSG00000007080.14	ENSMUSG00000007080.14	Pole	chr5:110286305-110337474	WT_U	WT_D	OK	27.8048	24.9157	-0.158279	0.50401	0.47585	0.736496	no
ENSMUSG00000007207.10	ENSMUSG00000007207.10	Stx1a	chr5:135023481-135051100	WT_U	WT_D	OK	23.8193	24.7277	0.053997	-0.211022	0.75935	0.915902	no
ENSMUSG00000007216.6	ENSMUSG00000007216.6	Zfp775	chr6:48589444-48623227	WT_U	WT_D	OK	4.62865	5.47642	0.242642	-0.406141	0.55775	0.801707	no
ENSMUSG00000007338.9	ENSMUSG00000007338.9	Mrpl49	chr19:6046575-6057751	WT_U	WT_D	OK	34.7295	33.4179	-0.0555406	0.247282	0.7205	0.898954	no
ENSMUSG00000007411.15	ENSMUSG00000007411.15	Mark3	chr12:111574509-111656227	WT_U	WT_D	OK	22.3086	22.8673	0.0356861	-0.209097	0.7664	0.919029	no
ENSMUSG00000007415.15	ENSMUSG00000007415.15	Gatad1	chr5:3571565-3680325	WT_U	WT_D	OK	85.3388	80.1285	-0.0908864	0.341637	0.6181	0.840568	no
ENSMUSG00000007458.14	ENSMUSG00000007458.14	M6pr	chr6:122308719-122317680	WT_U	WT_D	OK	65.9623	63.6926	-0.0505159	0.295826	0.67255	0.872787	no
ENSMUSG00000007476.18	ENSMUSG00000007476.18	Lrrc8a	chr2:30236794-30344266	WT_U	WT_D	OK	7.006	7.90778	0.174682	-0.366822	0.60145	0.830242	no
ENSMUSG00000007564.14	ENSMUSG00000007564.14	Ppp2r1a	chr17:20945310-20965916	WT_U	WT_D	OK	85.2519	81.9263	-0.0574053	0.327599	0.62885	0.847173	no
ENSMUSG00000007570.15	ENSMUSG00000007570.15	Fance	chr17:28313529-28326568	WT_U	WT_D	OK	19.2544	20.4202	0.0848088	-0.303287	0.64295	0.855641	no
ENSMUSG00000007589.8	ENSMUSG00000007589.8	Tinf2	chr14:55679082-55681817	WT_U	WT_D	OK	12.5979	12.2515	-0.0402249	0.201312	0.77275	0.921932	no
ENSMUSG00000007594.9	ENSMUSG00000007594.9	Hapln4	chr8:70083528-70090862	WT_U	WT_D	OK	1.42162	1.59749	0.168271	-0.770706	0.27105	0.525836	no
ENSMUSG00000007603.8	ENSMUSG00000007603.8	Dus3l	chr17:56764750-56770092	WT_U	WT_D	OK	25.5211	29.6551	0.21659	-1.25818	0.0701	0.207555	no
ENSMUSG00000007610.15	ENSMUSG00000007610.15	Gtpbp3	chr8:71488102-71511769	WT_U	WT_D	OK	12.822	13.2159	0.0436534	-0.160704	0.8194	0.93992	no
ENSMUSG00000007613.15	ENSMUSG00000007613.15	Tgfbr1	chr4:47353221-47414931	WT_U	WT_D	OK	27.2128	23.2338	-0.22806	1.22316	0.0776	0.223693	no
ENSMUSG00000007617.17	ENSMUSG00000007617.17	Homer1	chr13:93303756-93404129	WT_U	WT_D	OK	21.2606	19.9712	-0.0902613	0.475148	0.49225	0.750563	no
ENSMUSG00000007646.13	ENSMUSG00000007646.13	Rad51c	chr11:87376644-87404954	WT_U	WT_D	OK	12.3524	13.3999	0.117431	-0.555244	0.43105	0.697858	no
ENSMUSG00000007656.13	ENSMUSG00000007656.13	Arpp19	chr9:75037613-75060313	WT_U	WT_D	OK	79.3839	77.5619	-0.0334983	0.117952	0.8667	0.95574	no
ENSMUSG00000007659.18	ENSMUSG00000007659.18	Bcl2l1	chr2:152780667-152831728	WT_U	WT_D	OK	13.7817	16.6019	0.268595	-1.03389	0.128	0.321114	no
ENSMUSG00000007670.9	ENSMUSG00000007670.9	Khsrp	chr17:57021057-57031507	WT_U	WT_D	OK	49.5322	49.541	0.00025629	-0.00150152	0.9984	0.999128	no
ENSMUSG00000007721.5	ENSMUSG00000007721.5	Ccdc124	chr8:70868226-70873490	WT_U	WT_D	OK	164.799	132.336	-0.316502	1.85065	0.00905	0.0419352	yes
ENSMUSG00000007739.10	ENSMUSG00000007739.10	Cct4	chr11:22990518-23003780	WT_U	WT_D	OK	324.793	315.723	-0.0408612	0.185234	0.7835	0.926374	no
ENSMUSG00000007777.9	ENSMUSG00000007777.9	0610009B22Rik	chr11:51685385-51688874	WT_U	WT_D	OK	22.3903	27.2767	0.284795	-1.41168	0.04505	0.14893	no
ENSMUSG00000007783.9	ENSMUSG00000007783.9	Cpt1c	chr7:44959372-44974851	WT_U	WT_D	OK	7.97696	7.60004	-0.069832	0.350084	0.61515	0.83905	no
ENSMUSG00000007812.16	ENSMUSG00000007812.16	Zfp655	chr5:145231714-145247302	WT_U	WT_D	OK	19.8034	24.9857	0.335354	-1.51256	0.0169	0.069403	no
ENSMUSG00000007815.13	ENSMUSG00000007815.13	Rhoa	chr9:108302957-108338273	WT_U	WT_D	OK	205.229	182.491	-0.169409	0.570565	0.4102	0.678722	no
ENSMUSG00000007817.14	ENSMUSG00000007817.14	Zmiz1	chr14:25455736-25666743	WT_U	WT_D	OK	20.0436	20.4845	0.031391	-0.0767784	0.88295	0.960618	no
ENSMUSG00000007827.10	ENSMUSG00000007827.10	Ankrd26	chr6:118501307-118562226	WT_U	WT_D	OK	10.1121	9.62574	-0.0711133	0.251882	0.6473	0.858102	no
ENSMUSG00000007833.13	ENSMUSG00000007833.13	Aldh16a1	chr7:45140683-45160064	WT_U	WT_D	OK	10.1125	10.2854	0.0244582	-0.0682383	0.9121	0.969262	no
ENSMUSG00000007836.6	ENSMUSG00000007836.6	Hnrnpa0	chr13:58125878-58128556	WT_U	WT_D	OK	108.229	108.232	3.99895e-05	-0.000244148	0.9997	0.99976	no
ENSMUSG00000007837.10	ENSMUSG00000007837.10	Prrg2	chr7:45053612-45061652	WT_U	WT_D	OK	2.72508	2.59998	-0.0677981	0.289922	0.6802	0.877159	no
ENSMUSG00000007850.16	ENSMUSG00000007850.16	Hnrnph1	chr11:50376989-50386528	WT_U	WT_D	OK	632.798	638.762	0.0135334	-0.0431053	0.92505	0.973504	no
ENSMUSG00000007867.8	ENSMUSG00000007867.8	Ift43	chr12:86082560-86162458	WT_U	WT_D	OK	29.594	33.3002	0.170226	-0.84963	0.2225	0.465512	no
ENSMUSG00000007872.3	ENSMUSG00000007872.3	Id3	chr4:136143496-136145755	WT_U	WT_D	OK	27.6497	6.59328	-2.0682	9.52642	5e-05	0.00046241	yes
ENSMUSG00000007880.16	ENSMUSG00000007880.16	Arid1a	chr4:133679007-133756769	WT_U	WT_D	OK	58.6986	64.5008	0.135991	-0.720736	0.25835	0.510117	no
ENSMUSG00000007888.15	ENSMUSG00000007888.15	Crlf1	chr8:70493157-70504081	WT_U	WT_D	OK	1.19006	1.15914	-0.0379795	0.103669	0.87305	0.957549	no
ENSMUSG00000007891.15	ENSMUSG00000007891.15	Ctsd	chr7:142325836-142388038	WT_U	WT_D	OK	307.515	403.091	0.390449	-1.92363	0.00545	0.0276054	yes
ENSMUSG00000007892.7	ENSMUSG00000007892.7	Rplp1	chr9:61913283-61914538	WT_U	WT_D	OK	2132.87	2191.9	0.0393859	-0.228119	0.74485	0.909659	no
ENSMUSG00000007908.14	ENSMUSG00000007908.14	Hmgcll1	chr9:75775363-76136350	WT_U	WT_D	OK	4.18117	5.22855	0.322504	-1.21111	0.04925	0.159376	no
ENSMUSG00000007944.8	ENSMUSG00000007944.8	Ttc9b	chr7:27653914-27674598	WT_U	WT_D	OK	13.0893	10.9168	-0.261838	0.947693	0.1782	0.40256	no
ENSMUSG00000007946.10	ENSMUSG00000007946.10	Phox2a	chr7:101818312-101838076	WT_U	WT_D	OK	95.6972	121.917	0.349351	-1.51687	0.03155	0.113242	no
ENSMUSG00000007950.8	ENSMUSG00000007950.8	Abhd8	chr8:71456699-71463657	WT_U	WT_D	OK	37.9887	31.096	-0.288841	1.67939	0.017	0.0697052	no
ENSMUSG00000007987.12	ENSMUSG00000007987.12	Ift22	chr5:136908149-136915404	WT_U	WT_D	OK	14.6655	13.3973	-0.130484	0.442183	0.5286	0.779637	no
ENSMUSG00000007989.6	ENSMUSG00000007989.6	Fzd3	chr14:65201025-65262463	WT_U	WT_D	OK	10.1228	11.3552	0.165745	-0.846816	0.21805	0.459803	no
ENSMUSG00000008035.12	ENSMUSG00000008035.12	Mid1ip1	chrX:10707175-10719690	WT_U	WT_D	OK	57.7442	73.5708	0.349457	-1.70629	0.0119	0.0523522	no
ENSMUSG00000008036.11	ENSMUSG00000008036.11	Ap2s1	chr7:16738409-16749294	WT_U	WT_D	OK	100.325	89.8756	-0.15868	0.917854	0.18455	0.412092	no
ENSMUSG00000008090.14	ENSMUSG00000008090.14	Fgfrl1	chr5:108692381-108706924	WT_U	WT_D	OK	3.94599	3.07981	-0.357546	0.958068	0.16025	0.374831	no
ENSMUSG00000008140.17	ENSMUSG00000008140.17	Emc10	chr7:44489936-44496529	WT_U	WT_D	OK	60.8383	61.5486	0.0167462	-0.0884049	0.8935	0.963476	no
ENSMUSG00000008153.11	ENSMUSG00000008153.11	Clstn3	chr6:124430758-124464794	WT_U	WT_D	OK	3.58411	3.87762	0.113557	-0.398307	0.53125	0.781624	no
ENSMUSG00000008167.14	ENSMUSG00000008167.14	Fbxw9	chr8:85036914-85067124	WT_U	WT_D	OK	5.72564	6.90385	0.269964	-0.29471	0.6413	0.854626	no
ENSMUSG00000008200.14	ENSMUSG00000008200.14	Fnbp4	chr2:90745369-90781021	WT_U	WT_D	OK	36.9238	33.4439	-0.142808	0.538939	0.4261	0.693621	no
ENSMUSG00000008206.15	ENSMUSG00000008206.15	Cers4	chr8:4493025-4531680	WT_U	WT_D	OK	20.0555	15.0234	-0.416787	1.67088	0.0085	0.0398455	yes
ENSMUSG00000008226.14	ENSMUSG00000008226.14	Scrn3	chr2:73271924-73337818	WT_U	WT_D	OK	13.7566	13.9026	0.0152308	-0.0354993	0.95865	0.983877	no
ENSMUSG00000008301.11	ENSMUSG00000008301.11	Phax	chr18:56509686-56587712	WT_U	WT_D	OK	26.1274	26.2255	0.00540671	-0.0248313	0.97255	0.988212	no
ENSMUSG00000008305.18	ENSMUSG00000008305.18	Tle1	chr4:72117141-72200919	WT_U	WT_D	OK	6.46521	4.62376	-0.483631	2.13986	0.00145	0.00904287	yes
ENSMUSG00000008307.11	ENSMUSG00000008307.11	1700109H08Rik	chr5:3571565-3680325	WT_U	WT_D	OK	1.89837	1.63102	-0.218987	0.111045	0.78025	0.925075	no
ENSMUSG00000008318.9	ENSMUSG00000008318.9	Relt	chr7:100845847-100863446	WT_U	WT_D	OK	6.0849	5.531	-0.137693	0.378152	0.57235	0.811666	no
ENSMUSG00000008333.12	ENSMUSG00000008333.12	Snrpb2	chr2:143063038-143072853	WT_U	WT_D	OK	61.7237	56.5355	-0.126667	0.553141	0.4274	0.694778	no
ENSMUSG00000008348.9	ENSMUSG00000008348.9	Ubc	chr5:125385964-125390554	WT_U	WT_D	OK	2.82058	4.03508	0.516605	-2.44967	0.00065	0.00454161	yes
ENSMUSG00000008373.16	ENSMUSG00000008373.16	Prpf31	chr7:3629984-3644887	WT_U	WT_D	OK	83.6259	81.135	-0.0436254	0.197597	0.7752	0.922882	no
ENSMUSG00000008384.8	ENSMUSG00000008384.8	Sertad1	chr7:27486909-27490316	WT_U	WT_D	OK	6.99996	4.95382	-0.498805	2.24481	0.00085	0.0057262	yes
ENSMUSG00000008393.8	ENSMUSG00000008393.8	Carhsp1	chr16:8658586-8672153	WT_U	WT_D	OK	25.2837	24.6711	-0.0353856	0.205867	0.7724	0.921745	no
ENSMUSG00000008398.14	ENSMUSG00000008398.14	Elk3	chr10:93247413-93311135	WT_U	WT_D	OK	18.4049	13.1892	-0.480733	2.30391	0.00095	0.00629407	yes
[truncated: 10,912 more rows]

## Sheet: Diff_FPKMover1
test_id	gene_id	gene	locus	sample_2	sample_1	status	value_2	value_1	log2(fold_change)	test_stat	p_value	q_value	significant
[truncated: 11,700 more rows]

[truncated: 5 more sheets: Significant, 2-fold, 2-fold_FPKMover1, Down_in_Diff, Up_in_Diff]
